# Supplementary material for: Full-length transcriptome sequences of ephemeral plant Arabidopsis pumila provides insight into gene expression dynamics during continuous salt stress
Source: BMC Genomics. 2018 Sep 27;19:717. doi: 10.1186/s12864-018-5106-y (PMC6161380; doi:10.1186/s12864-018-5106-y)
Supplement: Supplementary file 12 — The 483 differentially expressed transcription factors between different time points. (XLSX 461 kb) [file 12864_2018_5106_MOESM12_ESM.xlsx]

## Sheet: Transcription factors
Transcription factors gene family	gene_id	S0h FPKM	S0.5h FPKM	S3h FPKM	S6h FPKM	S12h FPKM	S24h FPKM	S48h FPKM	Gene Length	NR GI	NR ID	NR Score	NR Evalue	NR Description	NT GI	NT ID	NT Score	NT Evalue	NT Description	KO ID	KO Name	KO Description	Http Link	Swissprot ID	Swissprot Score	Swissprot Evalue	Swissprot Description	PFAM ID	PFAM description	Gene Ontology Biological Pathway	BP Description	Gene Ontology Molecular Function	MF Description	Gene Ontology Cellular Component	CC Description	KOG ID	KOG Description	UP_DOWN_REGULATION(S48hvsS3h)	log2ratio(S48hvsS3h)	q value(S48hvsS3h)	UP_DOWN_REGULATION(S48hvsS0h)	log2ratio(S48hvsS0h)	q value(S48hvsS0h)	UP_DOWN_REGULATION(S6hvsS0h)	log2ratio(S6hvsS0h)	q value(S6hvsS0h)	UP_DOWN_REGULATION(S12hvsS3h)	log2ratio(S12hvsS3h)	q value(S12hvsS3h)
Orphans	1-2k.c1414/9/1878	32.5433	31.3867	47.32	40.64	17.14	4.91333	6.38	1873	727630696	XP_010486334.1	1617	1.1e-177	PREDICTED: zinc finger protein CONSTANS-LIKE 9-like [Camelina sativa]	727630695	XM_010488032.1	1174	0	PREDICTED: Camelina sativa zinc finger protein CONSTANS-LIKE 9-like (LOC104764491), mRNA	--	--	--	--	Q9SSE5	1625	1.9e-179	Zinc finger protein CONSTANS-LIKE 9 OS=Arabidopsis thaliana GN=COL9 PE=2 SV=1	PF03137//PF06203//PF00643	Organic Anion Transporter Polypeptide (OATP) family//CCT motif//B-box zinc finger	GO:0006810	transport	GO:0005515//GO:0008270//GO:0005215	protein binding//zinc ion binding//transporter activity	GO:0005622//GO:0016020	intracellular//membrane	--	--	FALSE	-2.8684	0.055933	DOWN	-2.2704	0.027923	FALSE	0.42985	0.99065	FALSE	-1.427	0.052952
	1-2k.c19041/1/2180	0.283333	0.156667	0.67	1.27667	3.40667	4.74667	4.56667	2192	727542816	XP_010444769.1	2085	7.1e-232	PREDICTED: protein DA1-related 6-like isoform X2 [Camelina sativa]	727627609	XM_010486313.1	632	0	PREDICTED: Camelina sativa protein DA1-related 6-like (LOC104762909), transcript variant X4, mRNA	--	--	--	--	Q9FJX8	1863	5.5e-207	Protein DA1-related 6 OS=Arabidopsis thaliana GN=DAR6 PE=2 SV=1	PF00345//PF00412//PF04548	Pili and flagellar-assembly chaperone, PapD N-terminal domain//LIM domain//AIG1 family	GO:0071555	cell wall organization	GO:0005525//GO:0008270	GTP binding//zinc ion binding	GO:0030288	outer membrane-bounded periplasmic space	--	--	FALSE	2.7137	0.63275	UP	3.9721	0.014571	FALSE	2.2208	0.66004	FALSE	2.3429	0.4696
	1-2k.c21738/1/2216	0.14	3.9	3.15333	4.94	0.156667	6.41667	5.15	2197	565498024	XP_006306651.1	2572	2.4e-288	hypothetical protein CARUB_v10008167mg [Capsella rubella]>gi|482575362|gb|EOA39549.1| hypothetical protein CARUB_v10008167mg [Capsella rubella]	565498023	XM_006306589.1	1291	0	Capsella rubella hypothetical protein (CARUB_v10008167mg) mRNA, complete cds	K11644	SIN3A	paired amphipathic helix protein Sin3a	http://www.genome.jp/dbget-bin/www_bget?ko:K11644	Q9XIK6	2418	2.4e-271	Paired amphipathic helix protein Sin3-like 6 OS=Arabidopsis thaliana GN=SNL6 PE=3 SV=2	PF01857//PF02671	Retinoblastoma-associated protein B domain//Paired amphipathic helix repeat	GO:0051726//GO:0006355	regulation of cell cycle//regulation of transcription, DNA-templated	--	--	GO:0005634	nucleus	KOG4204	Histone deacetylase complex, SIN3 component	FALSE	0.67123	1	UP	5.4222	0.043918	FALSE	5.3259	0.056994	FALSE	-4.3357	1
	1-2k.c23601/1/1734.1	3.94	4.42	0.91	0.843333	0.756667	30.34	26.8533	810	297824763	XP_002880264.1	907	1e-95	pseudo-response regulator 9 [Arabidopsis lyrata subsp. lyrata]>gi|297326103|gb|EFH56523.1| pseudo-response regulator 9 [Arabidopsis lyrata subsp. lyrata]	727472836	XM_010520055.1	466	0	PREDICTED: Camelina sativa two-component response regulator-like APRR9 (LOC104793656), transcript variant X2, mRNA	K12128	PRR9	pseudo-response regulator 9	http://www.genome.jp/dbget-bin/www_bget?ko:K12128	Q8L500	831	9.4e-88	Two-component response regulator-like APRR9 OS=Arabidopsis thaliana GN=APRR9 PE=1 SV=2	PF02045//PF06203	CCAAT-binding transcription factor (CBF-B/NF-YA) subunit B//CCT motif	GO:0035556//GO:0000160//GO:0006355	intracellular signal transduction//phosphorelay signal transduction system//regulation of transcription, DNA-templated	GO:0005515//GO:0000156//GO:0003700	protein binding//phosphorelay response regulator activity//transcription factor activity, sequence-specific DNA binding	GO:0005667//GO:0005622	transcription factor complex//intracellular	--	--	UP	4.8067	0.021142	FALSE	2.6391	0.072912	FALSE	-2.1502	0.80441	FALSE	-0.19781	1
	1-2k.c23601/1/1734.2	1.66667	2.28333	0.673333	0.18	0.25	14.3067	11.47	790	297824763	XP_002880264.1	990	2.4e-105	pseudo-response regulator 9 [Arabidopsis lyrata subsp. lyrata]>gi|297326103|gb|EFH56523.1| pseudo-response regulator 9 [Arabidopsis lyrata subsp. lyrata]	186508729	NM_130245.4	553	0	Arabidopsis thaliana two-component response regulator-like APRR9 mRNA, complete cds	K12128	PRR9	pseudo-response regulator 9	http://www.genome.jp/dbget-bin/www_bget?ko:K12128	Q8L500	984	1.7e-105	Two-component response regulator-like APRR9 OS=Arabidopsis thaliana GN=APRR9 PE=1 SV=2	PF00072//PF00788	Response regulator receiver domain//Ras association (RalGDS/AF-6) domain	GO:0006355//GO:0000160//GO:0007165//GO:0035556	regulation of transcription, DNA-templated//phosphorelay signal transduction system//signal transduction//intracellular signal transduction	GO:0000156	phosphorelay response regulator activity	GO:0005622	intracellular	--	--	FALSE	3.9946	0.43817	FALSE	2.7126	0.2758	FALSE	-3.2281	0.93675	FALSE	-1.4214	1
	1-2k.c30454/1/2197	36.4267	29.75	9.51	4.34	1.64	9.95333	11.1933	2195	297810367	XP_002873067.1	1099	1.5e-117	pseudo-response regulator 7 [Arabidopsis lyrata subsp. lyrata]>gi|297318904|gb|EFH49326.1| pseudo-response regulator 7 [Arabidopsis lyrata subsp. lyrata]	30679774	NM_120359.2	884	0	Arabidopsis thaliana pseudo-response regulator 7 mRNA, complete cds	K12129	PRR7	pseudo-response regulator 7	http://www.genome.jp/dbget-bin/www_bget?ko:K12129	Q93WK5	1071	3.8e-115	Two-component response regulator-like APRR7 OS=Arabidopsis thaliana GN=APRR7 PE=1 SV=1	PF00072//PF06203	Response regulator receiver domain//CCT motif	GO:0000160//GO:0007165	phosphorelay signal transduction system//signal transduction	GO:0005515	protein binding	--	--	--	--	FALSE	0.21234	1	FALSE	-1.7551	0.13529	DOWN	-3.0246	0.00030461	DOWN	-2.4933	0.02486
	1-2k.c31056/1/1908	4.85667	3.2	3.86	1.38333	0.73	2.76667	3.05333	1838	565499190	XP_006307234.1	1422	4.5e-155	hypothetical protein CARUB_v10008839mg [Capsella rubella]>gi|482575945|gb|EOA40132.1| hypothetical protein CARUB_v10008839mg [Capsella rubella]	110742546	AK227143.1	1286	0	Arabidopsis thaliana mRNA for hypothetical protein, clone: RAFL09-83-K10	--	--	--	--	P0C7Q8	1384	1.6e-151	Protein DA1 OS=Arabidopsis thaliana GN=DA1 PE=1 SV=1	PF04931//PF00412//PF06140	DNA polymerase phi//LIM domain//Interferon-induced 6-16 family	GO:0006351//GO:0006260	transcription, DNA-templated//DNA replication	GO:0003677//GO:0003887//GO:0008270	DNA binding//DNA-directed DNA polymerase activity//zinc ion binding	GO:0016021//GO:0042575	integral component of membrane//DNA polymerase complex	--	--	FALSE	-0.31556	1	FALSE	-0.62951	0.97834	FALSE	-1.7531	0.40676	FALSE	-2.3528	0.54513
	1-2k.c31248/1/1952	15.1233	10.54	2.26	0.41	0.48	5.25	4.01	1948	297810367	XP_002873067.1	1979	1.2e-219	pseudo-response regulator 7 [Arabidopsis lyrata subsp. lyrata]>gi|297318904|gb|EFH49326.1| pseudo-response regulator 7 [Arabidopsis lyrata subsp. lyrata]	30679774	NM_120359.2	1494	0	Arabidopsis thaliana pseudo-response regulator 7 mRNA, complete cds	K12129	PRR7	pseudo-response regulator 7	http://www.genome.jp/dbget-bin/www_bget?ko:K12129	Q93WK5	1952	2.3e-217	Two-component response regulator-like APRR7 OS=Arabidopsis thaliana GN=APRR7 PE=1 SV=1	PF06203	CCT motif	GO:0007165	signal transduction	GO:0005515	protein binding	--	--	--	--	FALSE	0.77324	1	FALSE	-2.0341	0.10831	DOWN	-5.1928	8.1205e-06	FALSE	-2.1488	0.91181
	1-2k.c32828/1/2039	2.59333	3.03333	0.8	0	0	0.756667	0.506667	2030	565492246	XP_006303762.1	2434	2.2e-272	hypothetical protein CARUB_v10011949mg [Capsella rubella]>gi|482572473|gb|EOA36660.1| hypothetical protein CARUB_v10011949mg [Capsella rubella]	297845679	XM_002890675.1	1288	0	Arabidopsis lyrata subsp. lyrata hypothetical protein, mRNA	K14489	AHK2_3_4	arabidopsis histidine kinase 2/3/4 (cytokinin receptor)	http://www.genome.jp/dbget-bin/www_bget?ko:K14489	Q9C5U1	2434	3.1e-273	Histidine kinase 3 OS=Arabidopsis thaliana GN=AHK3 PE=1 SV=1	PF00072	Response regulator receiver domain	GO:0000160	phosphorelay signal transduction system	--	--	--	--	KOG0519	Sensory transduction histidine kinase	FALSE	-0.8471	1	FALSE	-2.5143	0.36824	DOWN	#NAME?	0.00070845	FALSE	#NAME?	0.94129
	1-2k.c36985/1/1872	0	2.68333	3.35667	5.72667	0	6.73	9.63	1874	18396292	NP_564276.1	2177	1.3e-242	histidine kinase 3 [Arabidopsis thaliana]>gi|75168994|sp|Q9C5U1.1|AHK3_ARATH RecName: Full=Histidine kinase 3; AltName: Full=Arabidopsis histidine kinase 3; Short=AtHK3; AltName: Full=Protein AUTHENTIC HIS-KINASE 3; AltName: Full=Protein ORESARA 12>gi|13537198|dbj|BAB40775.1| histidine kinase [Arabidopsis thaliana]>gi|332192685|gb|AEE30806.1| histidine kinase 3 [Arabidopsis thaliana]	567147364	XM_006415715.1	1154	0	Eutrema salsugineum hypothetical protein (EUTSA_v10006654mg) mRNA, complete cds	K14489	AHK2_3_4	arabidopsis histidine kinase 2/3/4 (cytokinin receptor)	http://www.genome.jp/dbget-bin/www_bget?ko:K14489	Q9C5U1	2177	1.8e-243	Histidine kinase 3 OS=Arabidopsis thaliana GN=AHK3 PE=1 SV=1	PF00072	Response regulator receiver domain	GO:0010150//GO:0009909//GO:0018106//GO:0009863//GO:0009414//GO:0070417//GO:0006635//GO:0009873//GO:0042742//GO:0071215//GO:0007165//GO:0010271//GO:0048831//GO:0009651//GO:0016036//GO:0031537//GO:0008219//GO:0080117//GO:0010029//GO:0034757//GO:0010087//GO:0048509//GO:0071329//GO:0016310//GO:0009736//GO:0006470//GO:0007623//GO:0006355//GO:0000303//GO:0000160//GO:0016558	leaf senescence//regulation of flower development//peptidyl-histidine phosphorylation//salicylic acid mediated signaling pathway//response to water deprivation//cellular response to cold//fatty acid beta-oxidation//ethylene-activated signaling pathway//defense response to bacterium//cellular response to abscisic acid stimulus//signal transduction//regulation of chlorophyll catabolic process//regu…	GO:0004721//GO:0000156//GO:0005524//GO:0000155//GO:0043424//GO:0009884//GO:0005034	phosphoprotein phosphatase activity//phosphorelay response regulator activity//ATP binding//phosphorelay sensor kinase activity//protein histidine kinase binding//cytokinin receptor activity//osmosensor activity	GO:0009365//GO:0005886	protein histidine kinase complex//plasma membrane	KOG0519	Sensory transduction histidine kinase	FALSE	1.5009	1	UP	Inf	0.0028172	UP	Inf	0.005534	FALSE	#NAME?	0.6664
	1-2k.c37256/1/1365	6.53	1.53667	1.14667	0.546667	0.396667	0.14	0.206667	1352	727479285	XP_010415472.1	1091	8e-117	PREDICTED: zinc finger protein CONSTANS-LIKE 6-like [Camelina sativa]	727595641	XM_010472500.1	718	0	PREDICTED: Camelina sativa zinc finger protein CONSTANS-LIKE 6-like (LOC104750670), transcript variant X2, mRNA	--	--	--	--	Q8LG76	993	2.6e-106	Zinc finger protein CONSTANS-LIKE 6 OS=Arabidopsis thaliana GN=COL6 PE=2 SV=2	PF01412//PF00643	Putative GTPase activating protein for Arf//B-box zinc finger	--	--	GO:0008270//GO:0005096	zinc ion binding//GTPase activator activity	GO:0005622	intracellular	--	--	FALSE	-2.6511	1	DOWN	-5.1802	0.0075378	DOWN	-3.5465	0.030311	FALSE	-1.5039	1
	1-2k.c3938/1/2406	11.19	10.58	6.47333	2.66667	0.63	2.45333	1.35667	2383	18424319	NP_568919.1	1035	4.4e-110	pseudo-response regulator 3 [Arabidopsis thaliana]>gi|334188506|ref|NP_001190574.1| pseudo-response regulator 3 [Arabidopsis thaliana]>gi|52783244|sp|Q9LVG4.1|APRR3_ARATH RecName: Full=Two-component response regulator-like APRR3; AltName: Full=Pseudo-response regulator 3>gi|8777349|dbj|BAA96939.1| unnamed protein product [Arabidopsis thaliana]>gi|10281008|dbj|BAB13744.1| pseudo-response regulator…	186532600	NM_125403.2	745	0	Arabidopsis thaliana pseudo-response regulator 3 mRNA, complete cds	K12131	PRR3	pseudo-response regulator 3	http://www.genome.jp/dbget-bin/www_bget?ko:K12131	Q9LVG4	1035	6.2e-111	Two-component response regulator-like APRR3 OS=Arabidopsis thaliana GN=APRR3 PE=1 SV=1	PF00072//PF06203//PF04608	Response regulator receiver domain//CCT motif//Phosphatidylglycerophosphatase A	GO:0006355//GO:0006333//GO:0000160//GO:0006629//GO:0046486//GO:0042752//GO:0032091	regulation of transcription, DNA-templated//chromatin assembly or disassembly//phosphorelay signal transduction system//lipid metabolic process//glycerolipid metabolic process//regulation of circadian rhythm//negative regulation of protein binding	GO:0005515//GO:0000156//GO:0008962	protein binding//phosphorelay response regulator activity//phosphatidylglycerophosphatase activity	GO:0005634	nucleus	--	--	FALSE	-2.2573	0.7814	DOWN	-3.0372	0.010379	DOWN	-2.0088	0.039751	DOWN	-3.3257	0.0071241
	1-2k.c8443/1/1813	1.80667	1.36333	0.473333	0.31	0.236667	13.0333	11.52	1609	297824763	XP_002880264.1	1567	6.1e-172	pseudo-response regulator 9 [Arabidopsis lyrata subsp. lyrata]>gi|297326103|gb|EFH56523.1| pseudo-response regulator 9 [Arabidopsis lyrata subsp. lyrata]	727450132	XM_010508394.1	1022	0	PREDICTED: Camelina sativa two-component response regulator-like APRR9 (LOC104783264), transcript variant X1, mRNA	K12128	PRR9	pseudo-response regulator 9	http://www.genome.jp/dbget-bin/www_bget?ko:K12128	Q8L500	1535	4.4e-169	Two-component response regulator-like APRR9 OS=Arabidopsis thaliana GN=APRR9 PE=1 SV=2	PF00072//PF06203	Response regulator receiver domain//CCT motif	GO:0006355//GO:0035556//GO:0000160	regulation of transcription, DNA-templated//intracellular signal transduction//phosphorelay signal transduction system	GO:0005515//GO:0000156	protein binding//phosphorelay response regulator activity	GO:0005622	intracellular	--	--	UP	4.5215	0.024084	FALSE	2.5991	0.070166	FALSE	-2.4601	0.64965	FALSE	-0.96598	1
	1-2k.c9920/2/2088	15.7767	13.3267	7.58	3.96333	9.35	2.85333	2.60333	2104	565492246	XP_006303762.1	2690	4.8e-302	hypothetical protein CARUB_v10011949mg [Capsella rubella]>gi|482572473|gb|EOA36660.1| hypothetical protein CARUB_v10011949mg [Capsella rubella]	297845679	XM_002890675.1	1577	0	Arabidopsis lyrata subsp. lyrata hypothetical protein, mRNA	K14489	AHK2_3_4	arabidopsis histidine kinase 2/3/4 (cytokinin receptor)	http://www.genome.jp/dbget-bin/www_bget?ko:K14489	Q9C5U1	2687	1.5e-302	Histidine kinase 3 OS=Arabidopsis thaliana GN=AHK3 PE=1 SV=1	PF01855//PF00072	Pyruvate flavodoxin/ferredoxin oxidoreductase, thiamine diP-bdg//Response regulator receiver domain	GO:0000160//GO:0055114	phosphorelay signal transduction system//oxidation-reduction process	GO:0016491	oxidoreductase activity	--	--	KOG0519	Sensory transduction histidine kinase	FALSE	-1.6665	1	DOWN	-2.7972	0.0087034	FALSE	-1.8981	0.16212	FALSE	0.36769	1
	2-3k.c10579/1/3155	4.46667	2.29667	1.37667	0.693333	0.21	2.31333	1.87	3153	297810367	XP_002873067.1	1099	2.2e-117	pseudo-response regulator 7 [Arabidopsis lyrata subsp. lyrata]>gi|297318904|gb|EFH49326.1| pseudo-response regulator 7 [Arabidopsis lyrata subsp. lyrata]	727638944	XM_010492446.1	771	0	PREDICTED: Camelina sativa two-component response regulator-like APRR7 (LOC104768453), mRNA	K12129	PRR7	pseudo-response regulator 7	http://www.genome.jp/dbget-bin/www_bget?ko:K12129	Q93WK5	1071	5.5e-115	Two-component response regulator-like APRR7 OS=Arabidopsis thaliana GN=APRR7 PE=1 SV=1	PF00072//PF06203	Response regulator receiver domain//CCT motif	GO:0000160//GO:0007165	phosphorelay signal transduction system//signal transduction	GO:0005515	protein binding	--	--	--	--	FALSE	0.43083	1	FALSE	-1.2971	0.61867	FALSE	-2.6661	0.055583	FALSE	-2.7011	0.68472
	2-3k.c10866/2/3119	2.66333	1.47333	0.713333	0.176667	0.0366667	1.00333	0.436667	3112	297810367	XP_002873067.1	1099	2.2e-117	pseudo-response regulator 7 [Arabidopsis lyrata subsp. lyrata]>gi|297318904|gb|EFH49326.1| pseudo-response regulator 7 [Arabidopsis lyrata subsp. lyrata]	30679774	NM_120359.2	915	0	Arabidopsis thaliana pseudo-response regulator 7 mRNA, complete cds	K12129	PRR7	pseudo-response regulator 7	http://www.genome.jp/dbget-bin/www_bget?ko:K12129	Q93WK5	1071	5.4e-115	Two-component response regulator-like APRR7 OS=Arabidopsis thaliana GN=APRR7 PE=1 SV=1	PF06203//PF00072	CCT motif//Response regulator receiver domain	GO:0000160//GO:0007165	phosphorelay signal transduction system//signal transduction	GO:0005515	protein binding	--	--	--	--	FALSE	-0.75779	1	FALSE	-2.7432	0.15819	DOWN	-3.8462	0.012669	FALSE	-4.112	0.81974
	2-3k.c16704/1/3223	0	0.216667	0.25	0.903333	0	0.593333	0.62	3264	727532044	XP_010440767.1	3996	0	PREDICTED: histidine kinase 2 [Camelina sativa]	727556539	XM_010452114.1	2680	0	PREDICTED: Camelina sativa histidine kinase 2-like (LOC104732553), transcript variant X1, mRNA	K14489	AHK2_3_4	arabidopsis histidine kinase 2/3/4 (cytokinin receptor)	http://www.genome.jp/dbget-bin/www_bget?ko:K14489	Q9C5U2	3922	0	Histidine kinase 2 OS=Arabidopsis thaliana GN=AHK2 PE=1 SV=1	PF00072//PF08392//PF11057//PF00512	Response regulator receiver domain//FAE1/Type III polyketide synthase-like protein//Cortexin of kidney//His Kinase A (phospho-acceptor) domain	GO:0007165//GO:0016310//GO:0006633//GO:0000160	signal transduction//phosphorylation//fatty acid biosynthetic process//phosphorelay signal transduction system	GO:0016747//GO:0000155	transferase activity, transferring acyl groups other than amino-acyl groups//phosphorelay sensor kinase activity	GO:0016020//GO:0031224//GO:0009365	membrane//intrinsic component of membrane//protein histidine kinase complex	--	--	FALSE	1.225	1	FALSE	Inf	0.11338	UP	Inf	0.014203	FALSE	#NAME?	1
	2-3k.c18299/1/3755	0.346667	0	0.766667	0.566667	1.59667	0.95	0.36	3765	727460491	XP_010512077.1	4821	0	PREDICTED: paired amphipathic helix protein Sin3-like 4 [Camelina sativa]>gi|727460493|ref|XP_010512078.1| PREDICTED: paired amphipathic helix protein Sin3-like 4 [Camelina sativa]	727460492	XM_010513776.1	2640	0	PREDICTED: Camelina sativa paired amphipathic helix protein Sin3-like 4 (LOC104788091), transcript variant X2, mRNA	K11644	SIN3A	paired amphipathic helix protein Sin3a	http://www.genome.jp/dbget-bin/www_bget?ko:K11644	O04539	4747	0	Paired amphipathic helix protein Sin3-like 4 OS=Arabidopsis thaliana GN=SNL4 PE=3 SV=3	PF02671	Paired amphipathic helix repeat	GO:0006355	regulation of transcription, DNA-templated	--	--	--	--	KOG4204	Histone deacetylase complex, SIN3 component	FALSE	-1.1359	1	FALSE	0.30744	1	FALSE	0.93958	1	FALSE	1.0072	1
	2-3k.c18390/1/3515.1	0.47	1.13333	2.71	5.26667	4.49333	7.12333	7.20667	1467	727464103	XP_010513911.1	1418	1e-154	PREDICTED: histidine kinase 4 isoform X1 [Camelina sativa]	727464108	XM_010515612.1	1175	0	PREDICTED: Camelina sativa histidine kinase 4 (LOC104789945), transcript variant X4, mRNA	K14489	AHK2_3_4	arabidopsis histidine kinase 2/3/4 (cytokinin receptor)	http://www.genome.jp/dbget-bin/www_bget?ko:K14489	Q9C5U0	1379	4.9e-151	Histidine kinase 4 OS=Arabidopsis thaliana GN=AHK4 PE=1 SV=1	PF00072	Response regulator receiver domain	GO:0000160	phosphorelay signal transduction system	--	--	--	--	KOG0519	Sensory transduction histidine kinase	FALSE	1.3324	1	FALSE	3.8562	0.15319	UP	3.4946	0.036614	FALSE	0.72741	1
	2-3k.c18982/1/3106	3.14333	0.656667	1.10333	0.483333	0.696667	0.17	0.886667	3039	727609198	XP_010477744.1	4316	0	PREDICTED: paired amphipathic helix protein Sin3-like 3 [Camelina sativa]	727575138	XM_010461896.1	2224	0	PREDICTED: Camelina sativa paired amphipathic helix protein Sin3-like 3 (LOC104741114), transcript variant X1, mRNA	K11644	SIN3A	paired amphipathic helix protein Sin3a	http://www.genome.jp/dbget-bin/www_bget?ko:K11644	O48686	4166	0	Paired amphipathic helix protein Sin3-like 3 OS=Arabidopsis thaliana GN=SNL3 PE=1 SV=3	PF08785//PF02671	Ku C terminal domain like//Paired amphipathic helix repeat	GO:0006355	regulation of transcription, DNA-templated	GO:0016817	hydrolase activity, acting on acid anhydrides	--	--	KOG4204	Histone deacetylase complex, SIN3 component	FALSE	-0.37756	1	FALSE	-2.0079	0.29074	FALSE	-2.584	0.084317	FALSE	-0.55688	1
	2-3k.c18996/1/3218	2.06	0	3.03333	0.876667	1.19	0.53	0	3378	565492246	XP_006303762.1	4707	0	hypothetical protein CARUB_v10011949mg [Capsella rubella]>gi|482572473|gb|EOA36660.1| hypothetical protein CARUB_v10011949mg [Capsella rubella]	297845679	XM_002890675.1	2674	0	Arabidopsis lyrata subsp. lyrata hypothetical protein, mRNA	K14489	AHK2_3_4	arabidopsis histidine kinase 2/3/4 (cytokinin receptor)	http://www.genome.jp/dbget-bin/www_bget?ko:K14489	Q9C5U1	4680	0	Histidine kinase 3 OS=Arabidopsis thaliana GN=AHK3 PE=1 SV=1	PF01855//PF00512//PF01151//PF00072	Pyruvate flavodoxin/ferredoxin oxidoreductase, thiamine diP-bdg//His Kinase A (phospho-acceptor) domain//GNS1/SUR4 family//Response regulator receiver domain	GO:0055114//GO:0000160//GO:0007165//GO:0016310	oxidation-reduction process//phosphorelay signal transduction system//signal transduction//phosphorylation	GO:0000155//GO:0016491	phosphorelay sensor kinase activity//oxidoreductase activity	GO:0016021//GO:0009365	integral component of membrane//protein histidine kinase complex	--	--	DOWN	#NAME?	0.037125	DOWN	#NAME?	0.013432	FALSE	-1.1619	0.98517	FALSE	-1.2606	1
	2-3k.c21391/2/2980	34.2933	32.7267	8.12333	3.70667	2.90667	5.13667	2.97667	2957	297810367	XP_002873067.1	1099	2.1e-117	pseudo-response regulator 7 [Arabidopsis lyrata subsp. lyrata]>gi|297318904|gb|EFH49326.1| pseudo-response regulator 7 [Arabidopsis lyrata subsp. lyrata]	565458284	XM_006287080.1	920	0	Capsella rubella hypothetical protein (CARUB_v10000314mg) mRNA, complete cds	K12129	PRR7	pseudo-response regulator 7	http://www.genome.jp/dbget-bin/www_bget?ko:K12129	Q93WK5	1071	5.1e-115	Two-component response regulator-like APRR7 OS=Arabidopsis thaliana GN=APRR7 PE=1 SV=1	PF00072//PF06203	Response regulator receiver domain//CCT motif	GO:0007165//GO:0000160	signal transduction//phosphorelay signal transduction system	GO:0005515	protein binding	--	--	--	--	FALSE	-1.5163	1	DOWN	-3.6632	0.017397	DOWN	-3.1745	0.042533	FALSE	-1.4408	0.44377
	2-3k.c22340/1/2862	0	2.18333	1.84333	3.94333	0	3.86667	3.16	2873	565492246	XP_006303762.1	3968	0	hypothetical protein CARUB_v10011949mg [Capsella rubella]>gi|482572473|gb|EOA36660.1| hypothetical protein CARUB_v10011949mg [Capsella rubella]	297845679	XM_002890675.1	2293	0	Arabidopsis lyrata subsp. lyrata hypothetical protein, mRNA	K14489	AHK2_3_4	arabidopsis histidine kinase 2/3/4 (cytokinin receptor)	http://www.genome.jp/dbget-bin/www_bget?ko:K14489	Q9C5U1	3949	0	Histidine kinase 3 OS=Arabidopsis thaliana GN=AHK3 PE=1 SV=1	PF00072//PF00512//PF01855	Response regulator receiver domain//His Kinase A (phospho-acceptor) domain//Pyruvate flavodoxin/ferredoxin oxidoreductase, thiamine diP-bdg	GO:0007165//GO:0055114//GO:0000160//GO:0016310	signal transduction//oxidation-reduction process//phosphorelay signal transduction system//phosphorylation	GO:0016491//GO:0000155	oxidoreductase activity//phosphorelay sensor kinase activity	GO:0009365	protein histidine kinase complex	--	--	FALSE	0.81522	1	FALSE	Inf	0.084687	UP	Inf	0.0023398	FALSE	#NAME?	0.78259
	2-3k.c24252/1/2754	16.4867	18.7067	6.31333	3.46333	1.29667	8.26	9.32667	2727	297810367	XP_002873067.1	1361	7.9e-148	pseudo-response regulator 7 [Arabidopsis lyrata subsp. lyrata]>gi|297318904|gb|EFH49326.1| pseudo-response regulator 7 [Arabidopsis lyrata subsp. lyrata]	565458284	XM_006287080.1	918	0	Capsella rubella hypothetical protein (CARUB_v10000314mg) mRNA, complete cds	K12129	PRR7	pseudo-response regulator 7	http://www.genome.jp/dbget-bin/www_bget?ko:K12129	Q93WK5	1352	1.2e-147	Two-component response regulator-like APRR7 OS=Arabidopsis thaliana GN=APRR7 PE=1 SV=1	PF02768//PF00072//PF06203	DNA polymerase III beta subunit, C-terminal domain//Response regulator receiver domain//CCT motif	GO:0050794//GO:0006260//GO:0000160	regulation of cellular process//DNA replication//phosphorelay signal transduction system	GO:0003677//GO:0008408//GO:0003887//GO:0005515	DNA binding//3'-5' exonuclease activity//DNA-directed DNA polymerase activity//protein binding	GO:0009360//GO:0042575	DNA polymerase III complex//DNA polymerase complex	--	--	FALSE	0.55534	1	FALSE	-0.88227	0.72534	DOWN	-2.2188	0.015153	FALSE	-2.2317	0.098248
	2-3k.c24670/1/2697	7.86667	15.7067	6.45	4.04667	0.453333	8.84333	9.57667	2696	297810367	XP_002873067.1	1099	1.9e-117	pseudo-response regulator 7 [Arabidopsis lyrata subsp. lyrata]>gi|297318904|gb|EFH49326.1| pseudo-response regulator 7 [Arabidopsis lyrata subsp. lyrata]	565458284	XM_006287080.1	898	0	Capsella rubella hypothetical protein (CARUB_v10000314mg) mRNA, complete cds	K12129	PRR7	pseudo-response regulator 7	http://www.genome.jp/dbget-bin/www_bget?ko:K12129	Q93WK5	1071	4.7e-115	Two-component response regulator-like APRR7 OS=Arabidopsis thaliana GN=APRR7 PE=1 SV=1	PF00072//PF06203	Response regulator receiver domain//CCT motif	GO:0000160//GO:0007165	phosphorelay signal transduction system//signal transduction	GO:0005515	protein binding	--	--	--	--	FALSE	0.5584	1	FALSE	0.2703	1	FALSE	-0.93643	0.6698	DOWN	-3.8322	0.00044638
	2-3k.c24898/1/3001	2.33	2.97667	0.226667	0.406667	0.12	1.1	0.29	3000	297810367	XP_002873067.1	1882	3.4e-208	pseudo-response regulator 7 [Arabidopsis lyrata subsp. lyrata]>gi|297318904|gb|EFH49326.1| pseudo-response regulator 7 [Arabidopsis lyrata subsp. lyrata]	30679774	NM_120359.2	1337	0	Arabidopsis thaliana pseudo-response regulator 7 mRNA, complete cds	K12129	PRR7	pseudo-response regulator 7	http://www.genome.jp/dbget-bin/www_bget?ko:K12129	Q93WK5	1866	3.4e-207	Two-component response regulator-like APRR7 OS=Arabidopsis thaliana GN=APRR7 PE=1 SV=1	PF00072//PF06203	Response regulator receiver domain//CCT motif	GO:0000160//GO:0035556//GO:0006355	phosphorelay signal transduction system//intracellular signal transduction//regulation of transcription, DNA-templated	GO:0000156//GO:0005515	phosphorelay response regulator activity//protein binding	GO:0005622	intracellular	--	--	FALSE	0.51755	1	FALSE	-2.9578	0.17198	FALSE	-2.4509	0.20165	FALSE	-0.81426	1
	2-3k.c4103/6/2939	4.91	4.31667	0.77	0	0.103333	5.60333	0.903333	2936	727559748	XP_010452129.1	2187	1.4e-243	PREDICTED: two-component response regulator-like APRR7 isoform X1 [Camelina sativa]>gi|727559750|ref|XP_010452130.1| PREDICTED: two-component response regulator-like APRR7 isoform X2 [Camelina sativa]	565458284	XM_006287080.1	2012	0	Capsella rubella hypothetical protein (CARUB_v10000314mg) mRNA, complete cds	K12129	PRR7	pseudo-response regulator 7	http://www.genome.jp/dbget-bin/www_bget?ko:K12129	Q93WK5	2155	1e-240	Two-component response regulator-like APRR7 OS=Arabidopsis thaliana GN=APRR7 PE=1 SV=1	PF00072//PF06203	Response regulator receiver domain//CCT motif	GO:0000160	phosphorelay signal transduction system	GO:0005515	protein binding	--	--	--	--	FALSE	0.24533	1	FALSE	-2.3318	0.90449	FALSE	#NAME?	0.16551	FALSE	-2.8367	1
	2-3k.c5759/2/2855	8.21333	4.42667	1.67667	0.31	0.423333	0.47	0.15	2822	297810367	XP_002873067.1	1360	1.1e-147	pseudo-response regulator 7 [Arabidopsis lyrata subsp. lyrata]>gi|297318904|gb|EFH49326.1| pseudo-response regulator 7 [Arabidopsis lyrata subsp. lyrata]	565458284	XM_006287080.1	904	0	Capsella rubella hypothetical protein (CARUB_v10000314mg) mRNA, complete cds	K12129	PRR7	pseudo-response regulator 7	http://www.genome.jp/dbget-bin/www_bget?ko:K12129	Q93WK5	1351	1.7e-147	Two-component response regulator-like APRR7 OS=Arabidopsis thaliana GN=APRR7 PE=1 SV=1	PF06203//PF00072//PF02768	CCT motif//Response regulator receiver domain//DNA polymerase III beta subunit, C-terminal domain	GO:0006260//GO:0050794//GO:0000160	DNA replication//regulation of cellular process//phosphorelay signal transduction system	GO:0008408//GO:0003677//GO:0003887//GO:0005515	3'-5' exonuclease activity//DNA binding//DNA-directed DNA polymerase activity//protein binding	GO:0042575//GO:0009360	DNA polymerase complex//DNA polymerase III complex	--	--	FALSE	-3.5764	1	DOWN	-5.8882	5.5316e-06	DOWN	-4.6227	2.9601e-06	FALSE	-1.9282	1
	2-3k.c5780/1/2724	3.72333	6.00333	1.98667	0.266667	0.03	1.12667	1.94667	2748	727559748	XP_010452129.1	2187	1.3e-243	PREDICTED: two-component response regulator-like APRR7 isoform X1 [Camelina sativa]>gi|727559750|ref|XP_010452130.1| PREDICTED: two-component response regulator-like APRR7 isoform X2 [Camelina sativa]	565458284	XM_006287080.1	1928	0	Capsella rubella hypothetical protein (CARUB_v10000314mg) mRNA, complete cds	K12129	PRR7	pseudo-response regulator 7	http://www.genome.jp/dbget-bin/www_bget?ko:K12129	Q93WK5	2155	9.5e-241	Two-component response regulator-like APRR7 OS=Arabidopsis thaliana GN=APRR7 PE=1 SV=1	PF00072//PF06203	Response regulator receiver domain//CCT motif	GO:0000160	phosphorelay signal transduction system	GO:0005515	protein binding	--	--	--	--	FALSE	-0.038737	1	FALSE	-1.0554	0.92964	FALSE	-3.8573	0.34837	FALSE	-5.9417	0.34327
	2-3k.c6485/2/3672	0.0333333	4.90667	10.35	0.08	0.0166667	19.7533	24.1733	3663	565492246	XP_006303762.1	4947	0	hypothetical protein CARUB_v10011949mg [Capsella rubella]>gi|482572473|gb|EOA36660.1| hypothetical protein CARUB_v10011949mg [Capsella rubella]	297845679	XM_002890675.1	2816	0	Arabidopsis lyrata subsp. lyrata hypothetical protein, mRNA	K14489	AHK2_3_4	arabidopsis histidine kinase 2/3/4 (cytokinin receptor)	http://www.genome.jp/dbget-bin/www_bget?ko:K14489	Q9C5U1	4922	0	Histidine kinase 3 OS=Arabidopsis thaliana GN=AHK3 PE=1 SV=1	PF00072//PF00512//PF01151//PF01256//PF01855	Response regulator receiver domain//His Kinase A (phospho-acceptor) domain//GNS1/SUR4 family//Carbohydrate kinase//Pyruvate flavodoxin/ferredoxin oxidoreductase, thiamine diP-bdg	GO:0055114//GO:0000160//GO:0007165//GO:0016310	oxidation-reduction process//phosphorelay signal transduction system//signal transduction//phosphorylation	GO:0000155//GO:0052855//GO:0016491	phosphorelay sensor kinase activity//ADP-dependent NAD(P)H-hydrate dehydratase activity//oxidoreductase activity	GO:0016021//GO:0009365	integral component of membrane//protein histidine kinase complex	--	--	FALSE	1.2085	1	UP	9.5194	0.0024175	FALSE	1.274	1	FALSE	-9.182	0.74767
	2-3k.c6509/1/2964	12.8267	10.0867	8.39333	13.0633	9.44667	1.98667	3.55333	2995	565492246	XP_006303762.1	4129	0	hypothetical protein CARUB_v10011949mg [Capsella rubella]>gi|482572473|gb|EOA36660.1| hypothetical protein CARUB_v10011949mg [Capsella rubella]	297845679	XM_002890675.1	2358	0	Arabidopsis lyrata subsp. lyrata hypothetical protein, mRNA	K14489	AHK2_3_4	arabidopsis histidine kinase 2/3/4 (cytokinin receptor)	http://www.genome.jp/dbget-bin/www_bget?ko:K14489	Q9C5U1	4096	0	Histidine kinase 3 OS=Arabidopsis thaliana GN=AHK3 PE=1 SV=1	PF01855//PF00512//PF00072	Pyruvate flavodoxin/ferredoxin oxidoreductase, thiamine diP-bdg//His Kinase A (phospho-acceptor) domain//Response regulator receiver domain	GO:0016310//GO:0000160//GO:0055114//GO:0007165	phosphorylation//phosphorelay signal transduction system//oxidation-reduction process//signal transduction	GO:0016491//GO:0000155	oxidoreductase activity//phosphorelay sensor kinase activity	GO:0009365	protein histidine kinase complex	--	--	FALSE	-1.3544	1	FALSE	-2.0464	0.067437	FALSE	0.066647	1	FALSE	0.24688	1
	3-6k.c10171/1/4912.1	0.12	1.71	0.65	2.21	0.356667	0	0.0333333	3517	727581318	XP_010463539.1	4547	0	PREDICTED: paired amphipathic helix protein Sin3-like 1 [Camelina sativa]>gi|727581320|ref|XP_010463540.1| PREDICTED: paired amphipathic helix protein Sin3-like 1 [Camelina sativa]>gi|727581322|ref|XP_010463541.1| PREDICTED: paired amphipathic helix protein Sin3-like 1 [Camelina sativa]>gi|727581324|ref|XP_010463543.1| PREDICTED: paired amphipathic helix protein Sin3-like 1 [Camelina sativa]	297832803	XM_002884238.1	1432	0	Arabidopsis lyrata subsp. lyrata hypothetical protein, mRNA	K11644	SIN3A	paired amphipathic helix protein Sin3a	http://www.genome.jp/dbget-bin/www_bget?ko:K11644	Q9SRH9	4406	0	Paired amphipathic helix protein Sin3-like 1 OS=Arabidopsis thaliana GN=SNL1 PE=1 SV=2	PF02671//PF04147//PF16367	Paired amphipathic helix repeat//Nop14-like family//RNA recognition motif	GO:0006355	regulation of transcription, DNA-templated	GO:0003676	nucleic acid binding	GO:0032040	small-subunit processome	KOG4204	Histone deacetylase complex, SIN3 component	FALSE	-4.017	1	FALSE	-1.6925	1	FALSE	4.188	0.21434	FALSE	-0.76187	1
	3-6k.c10692/1/4305.1	0	2.12667	0	0	0	0	0	3699	727460491	XP_010512077.1	5315	0	PREDICTED: paired amphipathic helix protein Sin3-like 4 [Camelina sativa]>gi|727460493|ref|XP_010512078.1| PREDICTED: paired amphipathic helix protein Sin3-like 4 [Camelina sativa]	727460492	XM_010513776.1	2673	0	PREDICTED: Camelina sativa paired amphipathic helix protein Sin3-like 4 (LOC104788091), transcript variant X2, mRNA	K11644	SIN3A	paired amphipathic helix protein Sin3a	http://www.genome.jp/dbget-bin/www_bget?ko:K11644	O04539	5209	0	Paired amphipathic helix protein Sin3-like 4 OS=Arabidopsis thaliana GN=SNL4 PE=3 SV=3	PF02671	Paired amphipathic helix repeat	GO:0006355	regulation of transcription, DNA-templated	--	--	--	--	KOG4204	Histone deacetylase complex, SIN3 component	FALSE	NA	NA	FALSE	NA	NA	FALSE	NA	NA	FALSE	NA	NA
	3-6k.c10718/3/4003	5.05333	7.00333	2.78333	3.58667	7.06	1.16	2.85	3982	565492246	XP_006303762.1	4830	0	hypothetical protein CARUB_v10011949mg [Capsella rubella]>gi|482572473|gb|EOA36660.1| hypothetical protein CARUB_v10011949mg [Capsella rubella]	297845679	XM_002890675.1	2632	0	Arabidopsis lyrata subsp. lyrata hypothetical protein, mRNA	K14489	AHK2_3_4	arabidopsis histidine kinase 2/3/4 (cytokinin receptor)	http://www.genome.jp/dbget-bin/www_bget?ko:K14489	Q9C5U1	4820	0	Histidine kinase 3 OS=Arabidopsis thaliana GN=AHK3 PE=1 SV=1	PF00072//PF01855//PF01151//PF00512	Response regulator receiver domain//Pyruvate flavodoxin/ferredoxin oxidoreductase, thiamine diP-bdg//GNS1/SUR4 family//His Kinase A (phospho-acceptor) domain	GO:0007165//GO:0016310//GO:0055114//GO:0000160	signal transduction//phosphorylation//oxidation-reduction process//phosphorelay signal transduction system	GO:0016491//GO:0000155	oxidoreductase activity//phosphorelay sensor kinase activity	GO:0009365//GO:0016021	protein histidine kinase complex//integral component of membrane	--	--	FALSE	-0.09286	1	FALSE	-0.9891	0.77296	FALSE	-0.37274	1	FALSE	1.4029	0.72082
	3-6k.c13782/6/4194	11.23	4.07	8.42667	10.8	8.59333	1.88667	2.92667	4195	565492246	XP_006303762.1	4954	0	hypothetical protein CARUB_v10011949mg [Capsella rubella]>gi|482572473|gb|EOA36660.1| hypothetical protein CARUB_v10011949mg [Capsella rubella]	297845679	XM_002890675.1	2784	0	Arabidopsis lyrata subsp. lyrata hypothetical protein, mRNA	K14489	AHK2_3_4	arabidopsis histidine kinase 2/3/4 (cytokinin receptor)	http://www.genome.jp/dbget-bin/www_bget?ko:K14489	Q9C5U1	4926	0	Histidine kinase 3 OS=Arabidopsis thaliana GN=AHK3 PE=1 SV=1	PF01855//PF01256//PF01151//PF00512//PF00072	Pyruvate flavodoxin/ferredoxin oxidoreductase, thiamine diP-bdg//Carbohydrate kinase//GNS1/SUR4 family//His Kinase A (phospho-acceptor) domain//Response regulator receiver domain	GO:0000160//GO:0055114//GO:0016310//GO:0007165	phosphorelay signal transduction system//oxidation-reduction process//phosphorylation//signal transduction	GO:0000155//GO:0016491//GO:0052855	phosphorelay sensor kinase activity//oxidoreductase activity//ADP-dependent NAD(P)H-hydrate dehydratase activity	GO:0016021//GO:0009365	integral component of membrane//protein histidine kinase complex	--	--	FALSE	-1.6341	1	DOWN	-2.0881	0.037558	FALSE	0.029059	1	FALSE	0.10391	1
	3-6k.c14128/1/4533	2.79	2.04	5.02	4.56333	0.02	4.70667	5.66667	4372	727609198	XP_010477744.1	5942	0	PREDICTED: paired amphipathic helix protein Sin3-like 3 [Camelina sativa]	297850899	XM_002893285.1	3078	0	Arabidopsis lyrata subsp. lyrata hypothetical protein, mRNA	K11644	SIN3A	paired amphipathic helix protein Sin3a	http://www.genome.jp/dbget-bin/www_bget?ko:K11644	O48686	5811	0	Paired amphipathic helix protein Sin3-like 3 OS=Arabidopsis thaliana GN=SNL3 PE=1 SV=3	PF02671//PF00641	Paired amphipathic helix repeat//Zn-finger in Ran binding protein and others	GO:0006355	regulation of transcription, DNA-templated	GO:0008270	zinc ion binding	--	--	KOG4204	Histone deacetylase complex, SIN3 component	FALSE	0.12041	1	FALSE	0.97837	0.67271	FALSE	0.7503	0.97767	DOWN	-8.0188	0.039897
	3-6k.c14171/1/3651	4.41667	5.15333	2.15667	8.84667	8.71	4.36333	2.33333	3681	565492246	XP_006303762.1	4954	0	hypothetical protein CARUB_v10011949mg [Capsella rubella]>gi|482572473|gb|EOA36660.1| hypothetical protein CARUB_v10011949mg [Capsella rubella]	297845679	XM_002890675.1	2784	0	Arabidopsis lyrata subsp. lyrata hypothetical protein, mRNA	K14489	AHK2_3_4	arabidopsis histidine kinase 2/3/4 (cytokinin receptor)	http://www.genome.jp/dbget-bin/www_bget?ko:K14489	Q9C5U1	4926	0	Histidine kinase 3 OS=Arabidopsis thaliana GN=AHK3 PE=1 SV=1	PF00072//PF01151//PF00512//PF01855//PF01256	Response regulator receiver domain//GNS1/SUR4 family//His Kinase A (phospho-acceptor) domain//Pyruvate flavodoxin/ferredoxin oxidoreductase, thiamine diP-bdg//Carbohydrate kinase	GO:0016310//GO:0007165//GO:0000160//GO:0055114	phosphorylation//signal transduction//phosphorelay signal transduction system//oxidation-reduction process	GO:0052855//GO:0016491//GO:0000155	ADP-dependent NAD(P)H-hydrate dehydratase activity//oxidoreductase activity//phosphorelay sensor kinase activity	GO:0009365//GO:0016021	protein histidine kinase complex//integral component of membrane	--	--	FALSE	-0.033376	1	FALSE	-1.1187	0.83596	FALSE	1.0405	0.42748	UP	2.0564	0.021064
	3-6k.c14997/1/3798	0	1.10667	1.31667	0.0166667	0	3.04333	4.03	3795	565492246	XP_006303762.1	4947	0	hypothetical protein CARUB_v10011949mg [Capsella rubella]>gi|482572473|gb|EOA36660.1| hypothetical protein CARUB_v10011949mg [Capsella rubella]	297845679	XM_002890675.1	2793	0	Arabidopsis lyrata subsp. lyrata hypothetical protein, mRNA	K14489	AHK2_3_4	arabidopsis histidine kinase 2/3/4 (cytokinin receptor)	http://www.genome.jp/dbget-bin/www_bget?ko:K14489	Q9C5U1	4922	0	Histidine kinase 3 OS=Arabidopsis thaliana GN=AHK3 PE=1 SV=1	PF00072//PF01151//PF00512//PF01855//PF01256	Response regulator receiver domain//GNS1/SUR4 family//His Kinase A (phospho-acceptor) domain//Pyruvate flavodoxin/ferredoxin oxidoreductase, thiamine diP-bdg//Carbohydrate kinase	GO:0007165//GO:0016310//GO:0055114//GO:0000160	signal transduction//phosphorylation//oxidation-reduction process//phosphorelay signal transduction system	GO:0016491//GO:0052855//GO:0000155	oxidoreductase activity//ADP-dependent NAD(P)H-hydrate dehydratase activity//phosphorelay sensor kinase activity	GO:0009365//GO:0016021	protein histidine kinase complex//integral component of membrane	--	--	FALSE	1.5897	1	UP	Inf	0.0012797	FALSE	Inf	1	FALSE	#NAME?	0.78907
	3-6k.c15585/1/4305.2	0	2.02667	3.34333	6.01667	0	3.91667	1.14333	1985	565492246	XP_006303762.1	2518	4e-282	hypothetical protein CARUB_v10011949mg [Capsella rubella]>gi|482572473|gb|EOA36660.1| hypothetical protein CARUB_v10011949mg [Capsella rubella]	297845679	XM_002890675.1	1477	0	Arabidopsis lyrata subsp. lyrata hypothetical protein, mRNA	K14489	AHK2_3_4	arabidopsis histidine kinase 2/3/4 (cytokinin receptor)	http://www.genome.jp/dbget-bin/www_bget?ko:K14489	Q9C5U1	2512	2.8e-282	Histidine kinase 3 OS=Arabidopsis thaliana GN=AHK3 PE=1 SV=1	PF01855//PF00072	Pyruvate flavodoxin/ferredoxin oxidoreductase, thiamine diP-bdg//Response regulator receiver domain	GO:0000160//GO:0055114	phosphorelay signal transduction system//oxidation-reduction process	GO:0016491	oxidoreductase activity	--	--	KOG0519	Sensory transduction histidine kinase	FALSE	-1.6161	1	FALSE	Inf	0.092134	UP	Inf	0.0034911	FALSE	#NAME?	0.75523
	3-6k.c19256/4/4282	1.04	0.666667	0.523333	0.446667	0	0.71	0.35	4282	727460491	XP_010512077.1	5700	0	PREDICTED: paired amphipathic helix protein Sin3-like 4 [Camelina sativa]>gi|727460493|ref|XP_010512078.1| PREDICTED: paired amphipathic helix protein Sin3-like 4 [Camelina sativa]	727460492	XM_010513776.1	3094	0	PREDICTED: Camelina sativa paired amphipathic helix protein Sin3-like 4 (LOC104788091), transcript variant X2, mRNA	K11644	SIN3A	paired amphipathic helix protein Sin3a	http://www.genome.jp/dbget-bin/www_bget?ko:K11644	O04539	5609	0	Paired amphipathic helix protein Sin3-like 4 OS=Arabidopsis thaliana GN=SNL4 PE=3 SV=3	PF02671	Paired amphipathic helix repeat	GO:0006355	regulation of transcription, DNA-templated	--	--	--	--	KOG4204	Histone deacetylase complex, SIN3 component	FALSE	-0.81349	1	FALSE	-1.7763	0.617	FALSE	-1.2166	0.84984	FALSE	#NAME?	0.90271
	3-6k.c19509/41/4287	10.36	8.85333	8.49333	5.22	11.7333	3.46333	6.01333	4269	565492246	XP_006303762.1	4830	0	hypothetical protein CARUB_v10011949mg [Capsella rubella]>gi|482572473|gb|EOA36660.1| hypothetical protein CARUB_v10011949mg [Capsella rubella]	297845679	XM_002890675.1	2779	0	Arabidopsis lyrata subsp. lyrata hypothetical protein, mRNA	K14489	AHK2_3_4	arabidopsis histidine kinase 2/3/4 (cytokinin receptor)	http://www.genome.jp/dbget-bin/www_bget?ko:K14489	Q9C5U1	4820	0	Histidine kinase 3 OS=Arabidopsis thaliana GN=AHK3 PE=1 SV=1	PF00072//PF00512//PF01151//PF01855	Response regulator receiver domain//His Kinase A (phospho-acceptor) domain//GNS1/SUR4 family//Pyruvate flavodoxin/ferredoxin oxidoreductase, thiamine diP-bdg	GO:0000160//GO:0055114//GO:0016310//GO:0007165	phosphorelay signal transduction system//oxidation-reduction process//phosphorylation//signal transduction	GO:0000155//GO:0016491	phosphorelay sensor kinase activity//oxidoreductase activity	GO:0016021//GO:0009365	integral component of membrane//protein histidine kinase complex	--	--	FALSE	-0.55304	1	FALSE	-0.84915	0.66673	FALSE	-0.8846	0.53868	FALSE	0.52405	1
	3-6k.c21086/1/3784	6.83333	3.32333	4.28667	5.61333	3.28333	0.38	1.63667	3803	565492246	XP_006303762.1	3468	0	hypothetical protein CARUB_v10011949mg [Capsella rubella]>gi|482572473|gb|EOA36660.1| hypothetical protein CARUB_v10011949mg [Capsella rubella]	297845679	XM_002890675.1	2774	0	Arabidopsis lyrata subsp. lyrata hypothetical protein, mRNA	K14489	AHK2_3_4	arabidopsis histidine kinase 2/3/4 (cytokinin receptor)	http://www.genome.jp/dbget-bin/www_bget?ko:K14489	Q9C5U1	3449	0	Histidine kinase 3 OS=Arabidopsis thaliana GN=AHK3 PE=1 SV=1	PF01151//PF00512//PF01855//PF01256//PF00072	GNS1/SUR4 family//His Kinase A (phospho-acceptor) domain//Pyruvate flavodoxin/ferredoxin oxidoreductase, thiamine diP-bdg//Carbohydrate kinase//Response regulator receiver domain	GO:0016310//GO:0007165//GO:0000160//GO:0055114	phosphorylation//signal transduction//phosphorelay signal transduction system//oxidation-reduction process	GO:0016491//GO:0052855//GO:0000155	oxidoreductase activity//ADP-dependent NAD(P)H-hydrate dehydratase activity//phosphorelay sensor kinase activity	GO:0009365//GO:0016021	protein histidine kinase complex//integral component of membrane	--	--	FALSE	-1.4882	1	FALSE	-2.2253	0.057984	FALSE	-0.22267	1	FALSE	-0.30624	1
	3-6k.c21158/1/3829	0.37	2.76	5.51	8.9	0.526667	12.22	18.0933	3777	565492246	XP_006303762.1	4837	0	hypothetical protein CARUB_v10011949mg [Capsella rubella]>gi|482572473|gb|EOA36660.1| hypothetical protein CARUB_v10011949mg [Capsella rubella]	297845679	XM_002890675.1	2782	0	Arabidopsis lyrata subsp. lyrata hypothetical protein, mRNA	K14489	AHK2_3_4	arabidopsis histidine kinase 2/3/4 (cytokinin receptor)	http://www.genome.jp/dbget-bin/www_bget?ko:K14489	Q9C5U1	4827	0	Histidine kinase 3 OS=Arabidopsis thaliana GN=AHK3 PE=1 SV=1	PF00072//PF01855//PF01151//PF00512	Response regulator receiver domain//Pyruvate flavodoxin/ferredoxin oxidoreductase, thiamine diP-bdg//GNS1/SUR4 family//His Kinase A (phospho-acceptor) domain	GO:0007165//GO:0016310//GO:0055114//GO:0000160	signal transduction//phosphorylation//oxidation-reduction process//phosphorelay signal transduction system	GO:0016491//GO:0000155	oxidoreductase activity//phosphorelay sensor kinase activity	GO:0009365//GO:0016021	protein histidine kinase complex//integral component of membrane	--	--	FALSE	1.6916	1	UP	5.6188	0.040173	FALSE	4.5662	0.0886	FALSE	-3.4331	1
	3-6k.c22389/1/4383	0	0	0.863333	1.58333	0	0	0.05	4396	727609198	XP_010477744.1	5863	0	PREDICTED: paired amphipathic helix protein Sin3-like 3 [Camelina sativa]	727575138	XM_010461896.1	3066	0	PREDICTED: Camelina sativa paired amphipathic helix protein Sin3-like 3 (LOC104741114), transcript variant X1, mRNA	K11644	SIN3A	paired amphipathic helix protein Sin3a	http://www.genome.jp/dbget-bin/www_bget?ko:K11644	O48686	5756	0	Paired amphipathic helix protein Sin3-like 3 OS=Arabidopsis thaliana GN=SNL3 PE=1 SV=3	PF08785//PF02671	Ku C terminal domain like//Paired amphipathic helix repeat	GO:0006355	regulation of transcription, DNA-templated	GO:0016817	hydrolase activity, acting on acid anhydrides	--	--	KOG4204	Histone deacetylase complex, SIN3 component	FALSE	-4.0251	1	FALSE	Inf	1	UP	Inf	0.0067684	FALSE	#NAME?	0.82241
	3-6k.c23344/2/3644	7.98667	5.06667	6.79	1.71333	3.61	1.43	0.54	3638	565492246	XP_006303762.1	4830	0	hypothetical protein CARUB_v10011949mg [Capsella rubella]>gi|482572473|gb|EOA36660.1| hypothetical protein CARUB_v10011949mg [Capsella rubella]	297845679	XM_002890675.1	2779	0	Arabidopsis lyrata subsp. lyrata hypothetical protein, mRNA	K14489	AHK2_3_4	arabidopsis histidine kinase 2/3/4 (cytokinin receptor)	http://www.genome.jp/dbget-bin/www_bget?ko:K14489	Q9C5U1	4820	0	Histidine kinase 3 OS=Arabidopsis thaliana GN=AHK3 PE=1 SV=1	PF00072//PF01855//PF00512//PF01151	Response regulator receiver domain//Pyruvate flavodoxin/ferredoxin oxidoreductase, thiamine diP-bdg//His Kinase A (phospho-acceptor) domain//GNS1/SUR4 family	GO:0055114//GO:0000160//GO:0007165//GO:0016310	oxidation-reduction process//phosphorelay signal transduction system//signal transduction//phosphorylation	GO:0000155//GO:0016491	phosphorelay sensor kinase activity//oxidoreductase activity	GO:0016021//GO:0009365	integral component of membrane//protein histidine kinase complex	--	--	FALSE	-3.776	0.86372	DOWN	-4.0691	0.00021598	DOWN	-2.1169	0.029361	FALSE	-0.85494	1
	3-6k.c4146/3/4299	1.85333	1.06667	1.77333	0.28	0.516667	0.793333	0	4303	565492246	XP_006303762.1	3468	0	hypothetical protein CARUB_v10011949mg [Capsella rubella]>gi|482572473|gb|EOA36660.1| hypothetical protein CARUB_v10011949mg [Capsella rubella]	297845679	XM_002890675.1	2773	0	Arabidopsis lyrata subsp. lyrata hypothetical protein, mRNA	K14489	AHK2_3_4	arabidopsis histidine kinase 2/3/4 (cytokinin receptor)	http://www.genome.jp/dbget-bin/www_bget?ko:K14489	Q9C5U1	3449	0	Histidine kinase 3 OS=Arabidopsis thaliana GN=AHK3 PE=1 SV=1	PF00072//PF00512//PF01151//PF01256//PF01855	Response regulator receiver domain//His Kinase A (phospho-acceptor) domain//GNS1/SUR4 family//Carbohydrate kinase//Pyruvate flavodoxin/ferredoxin oxidoreductase, thiamine diP-bdg	GO:0000160//GO:0055114//GO:0016310//GO:0007165	phosphorelay signal transduction system//oxidation-reduction process//phosphorylation//signal transduction	GO:0000155//GO:0016491//GO:0052855	phosphorelay sensor kinase activity//oxidoreductase activity//ADP-dependent NAD(P)H-hydrate dehydratase activity	GO:0016021//GO:0009365	integral component of membrane//protein histidine kinase complex	--	--	FALSE	#NAME?	0.10437	DOWN	#NAME?	4.8057e-05	FALSE	-2.6368	0.10718	FALSE	-1.7202	1
	3-6k.c5773/1/3500	0	0	1.75333	3.96333	0	3.28667	2.62667	3505	565492246	XP_006303762.1	4837	0	hypothetical protein CARUB_v10011949mg [Capsella rubella]>gi|482572473|gb|EOA36660.1| hypothetical protein CARUB_v10011949mg [Capsella rubella]	297845679	XM_002890675.1	2683	0	Arabidopsis lyrata subsp. lyrata hypothetical protein, mRNA	K14489	AHK2_3_4	arabidopsis histidine kinase 2/3/4 (cytokinin receptor)	http://www.genome.jp/dbget-bin/www_bget?ko:K14489	Q9C5U1	4827	0	Histidine kinase 3 OS=Arabidopsis thaliana GN=AHK3 PE=1 SV=1	PF00072//PF00512//PF01151//PF01855	Response regulator receiver domain//His Kinase A (phospho-acceptor) domain//GNS1/SUR4 family//Pyruvate flavodoxin/ferredoxin oxidoreductase, thiamine diP-bdg	GO:0055114//GO:0000160//GO:0007165//GO:0016310	oxidation-reduction process//phosphorelay signal transduction system//signal transduction//phosphorylation	GO:0000155//GO:0016491	phosphorelay sensor kinase activity//oxidoreductase activity	GO:0016021//GO:0009365	integral component of membrane//protein histidine kinase complex	--	--	FALSE	0.63372	1	FALSE	Inf	0.13348	UP	Inf	0.027029	FALSE	#NAME?	0.75684
	3-6k.c7420/2/4326	0.203333	0	1.66667	1.37333	0.0633333	1.27667	0.63	4305	565492246	XP_006303762.1	4830	0	hypothetical protein CARUB_v10011949mg [Capsella rubella]>gi|482572473|gb|EOA36660.1| hypothetical protein CARUB_v10011949mg [Capsella rubella]	297845679	XM_002890675.1	2779	0	Arabidopsis lyrata subsp. lyrata hypothetical protein, mRNA	K14489	AHK2_3_4	arabidopsis histidine kinase 2/3/4 (cytokinin receptor)	http://www.genome.jp/dbget-bin/www_bget?ko:K14489	Q9C5U1	4820	0	Histidine kinase 3 OS=Arabidopsis thaliana GN=AHK3 PE=1 SV=1	PF00072//PF01855//PF01151//PF00512	Response regulator receiver domain//Pyruvate flavodoxin/ferredoxin oxidoreductase, thiamine diP-bdg//GNS1/SUR4 family//His Kinase A (phospho-acceptor) domain	GO:0055114//GO:0000160//GO:0007165//GO:0016310	oxidation-reduction process//phosphorelay signal transduction system//signal transduction//phosphorylation	GO:0000155//GO:0016491	phosphorelay sensor kinase activity//oxidoreductase activity	GO:0016021//GO:0009365	integral component of membrane//protein histidine kinase complex	--	--	FALSE	-1.2108	1	FALSE	1.7561	0.99741	FALSE	2.7561	0.15021	DOWN	-4.5996	0.024962
	3-6k.c9324/1/4237	0.246667	0.573333	0.913333	0.866667	1.54667	1.33333	1.69333	4247	334183798	NP_177163.3	5533	0	paired amphipathic helix protein Sin3-like 4 [Arabidopsis thaliana]>gi|374095485|sp|O04539.3|SNL4_ARATH RecName: Full=Paired amphipathic helix protein Sin3-like 4>gi|332196891|gb|AEE35012.1| paired amphipathic helix protein Sin3-like 4 [Arabidopsis thaliana]	727460492	XM_010513776.1	2223	0	PREDICTED: Camelina sativa paired amphipathic helix protein Sin3-like 4 (LOC104788091), transcript variant X2, mRNA	K11644	SIN3A	paired amphipathic helix protein Sin3a	http://www.genome.jp/dbget-bin/www_bget?ko:K11644	O04539	5533	0	Paired amphipathic helix protein Sin3-like 4 OS=Arabidopsis thaliana GN=SNL4 PE=3 SV=3	PF02671	Paired amphipathic helix repeat	GO:0043481//GO:0006355//GO:0010048//GO:0048440	anthocyanin accumulation in tissues in response to UV light//regulation of transcription, DNA-templated//vernalization response//carpel development	--	--	GO:0005634	nucleus	KOG4204	Histone deacetylase complex, SIN3 component	FALSE	0.87282	1	FALSE	2.7795	0.20399	FALSE	1.9065	0.64858	FALSE	0.80415	1
MYB	1-2k.c11045/1/2490	0.166667	0.106667	0.81	0.286667	0	0.843333	1.29333	2483	30690036	NP_195169.3	3647	0	SWI/SNF complex subunit SWI3D [Arabidopsis thaliana]>gi|332660975|gb|AEE86375.1| SWI/SNF complex subunit SWI3D [Arabidopsis thaliana]	727548300	XM_010448779.1	1928	0	PREDICTED: Camelina sativa SWI/SNF complex subunit SWI3D (LOC104729777), mRNA	K11649	SMARCC	SWI/SNF related-matrix-associated actin-dependent regulator of chromatin subfamily C	http://www.genome.jp/dbget-bin/www_bget?ko:K11649	Q8VY05	3634	0	SWI/SNF complex subunit SWI3D OS=Arabidopsis thaliana GN=SWI3D PE=1 SV=3	PF04433//PF00569	SWIRM domain//Zinc finger, ZZ type	--	--	GO:0005515//GO:0008270//GO:0003700//GO:0003677	protein binding//zinc ion binding//transcription factor activity, sequence-specific DNA binding//DNA binding	GO:0005634//GO:0005667	nucleus//transcription factor complex	KOG1279	Chromatin remodeling factor subunit and related transcription factors	FALSE	0.67073	1	FALSE	2.8718	0.48215	FALSE	0.71545	1	FALSE	#NAME?	0.32229
	1-2k.c16597/3/1812	28.5	15.8867	16.25	15.5167	7.94667	9.45	9.95	1813	565460566	XP_006288282.1	1257	6e-136	hypothetical protein CARUB_v10001525mg [Capsella rubella]>gi|482556988|gb|EOA21180.1| hypothetical protein CARUB_v10001525mg [Capsella rubella]	565460567	XM_006288221.1	1035	0	Capsella rubella hypothetical protein (CARUB_v10001525mg) mRNA, complete cds	--	--	--	--	Q8S9H7	486	2.1e-47	Transcription factor DIVARICATA OS=Antirrhinum majus GN=DIVARICATA PE=2 SV=1	--	--	--	--	--	--	--	--	--	--	FALSE	-0.70335	1	FALSE	-1.5067	0.27977	FALSE	-0.82281	0.62535	FALSE	-1.0017	0.7325
	1-2k.c17775/2/1218	124.897	320.437	197.123	213.437	237.17	185.393	216.697	1205	297797651	XP_002866710.1	1420	5e-155	AtMYB44/AtMYBr1 [Arabidopsis lyrata subsp. lyrata]>gi|297312545|gb|EFH42969.1| AtMYB44/AtMYBr1 [Arabidopsis lyrata subsp. lyrata]	665899259	AB904499.1	756	0	Cloning vector pTACAtg1 DNA, complete sequence	K09422	MYBP	myb proto-oncogene protein, plant	http://www.genome.jp/dbget-bin/www_bget?ko:K09422	Q9FDW1	1403	6.6e-154	Transcription factor MYB44 OS=Arabidopsis thaliana GN=MYB44 PE=2 SV=1	PF09111	SLIDE	GO:0006338	chromatin remodeling	GO:0016818//GO:0003676//GO:0005524//GO:0003677//GO:0003682	hydrolase activity, acting on acid anhydrides, in phosphorus-containing anhydrides//nucleic acid binding//ATP binding//DNA binding//chromatin binding	GO:0000785//GO:0005634	chromatin//nucleus	--	--	FALSE	0.10733	1	FALSE	0.8091	0.68806	FALSE	0.86798	0.43547	FALSE	0.29318	1
	1-2k.c23116/1/1563	18.4067	8.29333	2.73	1.77	2.49	5.69667	4.22333	1561	727607796	XP_010477007.1	1327	4e-144	PREDICTED: protein REVEILLE 7 [Camelina sativa]	727607795	XM_010478705.1	939	0	PREDICTED: Camelina sativa protein REVEILLE 7 (LOC104756167), mRNA	--	--	--	--	B3H5A8	1158	2.2e-125	Protein REVEILLE 7 OS=Arabidopsis thaliana GN=RVE7 PE=2 SV=1	--	--	--	--	--	--	--	--	--	--	FALSE	0.60381	1	FALSE	-2.1996	0.099891	DOWN	-3.3444	0.0012114	FALSE	-0.070904	1
	1-2k.c24160/1/2128	0	0	0.756667	3.22333	0	1.11333	1.28667	2127	727475587	XP_010413602.1	1776	4.7e-196	PREDICTED: transcriptional regulator ATRX-like [Camelina sativa]	727475586	XM_010415300.1	1365	0	PREDICTED: Camelina sativa transcriptional regulator ATRX-like (LOC104699902), mRNA	--	--	--	--	--	--	--	--	PF00439	Bromodomain	--	--	GO:0005515	protein binding	--	--	--	--	FALSE	0.74815	1	UP	Inf	0.038917	FALSE	Inf	0.12078	FALSE	#NAME?	0.94129
	1-2k.c24310/1/1963	1.06333	0.35	1.74667	3.00667	16.09	3.41667	5.59	1132	565459828	XP_006287913.1	788	9.1e-82	hypothetical protein CARUB_v10001147mg [Capsella rubella]>gi|482556619|gb|EOA20811.1| hypothetical protein CARUB_v10001147mg [Capsella rubella]	297811874	XM_002873775.1	809	0	Arabidopsis lyrata subsp. lyrata myb family transcription factor, mRNA	--	--	--	--	F4KGY6	774	5.4e-81	Protein REVEILLE 1 OS=Arabidopsis thaliana GN=RVE1 PE=2 SV=1	--	--	--	--	--	--	--	--	--	--	FALSE	1.6563	1	FALSE	2.3485	0.4373	FALSE	1.5642	0.8589	UP	3.2521	0.0083815
	1-2k.c24313/1/2553	0.62	0.383333	0.153333	0.456667	4.17667	6.32333	7.14333	2536	565498674	XP_006306976.1	2423	5.3e-271	hypothetical protein CARUB_v10008551mg [Capsella rubella]>gi|482575687|gb|EOA39874.1| hypothetical protein CARUB_v10008551mg [Capsella rubella]	565498673	XM_006306914.1	1794	0	Capsella rubella hypothetical protein (CARUB_v10008551mg) mRNA, complete cds	K12133	LHY	MYB-related transcription factor LHY	http://www.genome.jp/dbget-bin/www_bget?ko:K12133	Q6R0H1	2393	2.2e-268	Protein LHY OS=Arabidopsis thaliana GN=LHY PE=1 SV=2	PF01484	Nematode cuticle collagen N-terminal domain	--	--	GO:0042302	structural constituent of cuticle	--	--	--	--	UP	5.4709	0.002526	UP	3.4372	0.0084789	FALSE	-0.40147	1	UP	4.774	0.0013767
	1-2k.c25730/1/1771	46.4367	27.6933	25.0667	24.85	14.22	15.25	16.7533	1732	565460568	XP_006288283.1	1229	1e-132	hypothetical protein CARUB_v10001525mg [Capsella rubella]>gi|482556989|gb|EOA21181.1| hypothetical protein CARUB_v10001525mg [Capsella rubella]	565460567	XM_006288221.1	963	0	Capsella rubella hypothetical protein (CARUB_v10001525mg) mRNA, complete cds	--	--	--	--	Q8S9H7	487	1.6e-47	Transcription factor DIVARICATA OS=Antirrhinum majus GN=DIVARICATA PE=2 SV=1	PF07244//PF05053	Surface antigen variable number repeat//Menin	--	--	--	--	GO:0005634//GO:0019867	nucleus//outer membrane	--	--	FALSE	-0.58238	1	FALSE	-1.4686	0.25485	FALSE	-0.84393	0.55273	FALSE	-0.78315	0.85673
	1-2k.c28518/1/1968.1	0	1.01333	0	0.173333	0.303333	0	2.06667	1583	297810327	XP_002873047.1	1582	1.1e-173	myb domain protein 3R-5 [Arabidopsis lyrata subsp. lyrata]>gi|297318884|gb|EFH49306.1| myb domain protein 3R-5 [Arabidopsis lyrata subsp. lyrata]	565458879	XM_006287377.1	1069	0	Capsella rubella hypothetical protein (CARUB_v10000643mg) mRNA, complete cds	K09422	MYBP	myb proto-oncogene protein, plant	http://www.genome.jp/dbget-bin/www_bget?ko:K09422	Q9S7G7	441	3.1e-42	Myb-related protein 3R-1 OS=Arabidopsis thaliana GN=MYB3R-1 PE=2 SV=1	--	--	--	--	GO:0003677//GO:0003682	DNA binding//chromatin binding	GO:0000785	chromatin	KOG0048	Transcription factor, Myb superfamily	FALSE	Inf	0.23175	UP	Inf	0.030301	FALSE	Inf	1	FALSE	Inf	1
	1-2k.c28641/1/1868.2	2.57333	3.25333	1.95	8.84	24.8467	3.49333	6.18667	505	727583314	XP_010464609.1	649	5.3e-66	PREDICTED: protein REVEILLE 8-like isoform X1 [Camelina sativa]>gi|727583316|ref|XP_010464610.1| PREDICTED: protein REVEILLE 8-like isoform X1 [Camelina sativa]	727583318	XM_010466309.1	398	0	PREDICTED: Camelina sativa protein REVEILLE 8-like (LOC104745132), transcript variant X4, mRNA	--	--	--	--	Q8RWU3	643	3.7e-66	Protein REVEILLE 8 OS=Arabidopsis thaliana GN=RVE8 PE=2 SV=1	--	--	--	--	--	--	--	--	--	--	FALSE	1.4882	1	FALSE	1.2518	1	FALSE	2.022	0.85503	FALSE	3.7028	0.16938
	1-2k.c30185/1/2269	6.37	4.11667	0.74	1.6	6.23333	20.13	25.34	2242	727452318	XP_010507962.1	2398	3.7e-268	PREDICTED: protein CCA1-like isoform X1 [Camelina sativa]>gi|727452320|ref|XP_010507963.1| PREDICTED: protein CCA1-like isoform X1 [Camelina sativa]	727452317	XM_010509660.1	1482	0	PREDICTED: Camelina sativa protein CCA1-like (LOC104784624), transcript variant X1, mRNA	K12134	CCA1	circadian clock associated 1	http://www.genome.jp/dbget-bin/www_bget?ko:K12134	P92973	2285	6.6e-256	Protein CCA1 OS=Arabidopsis thaliana GN=CCA1 PE=1 SV=1	--	--	--	--	--	--	--	--	--	--	UP	5.0973	6.8939e-05	FALSE	1.8858	0.074731	FALSE	-1.966	0.36943	UP	3.1548	0.020666
	1-2k.c33119/1/1718	11.1433	5.36	5.79333	2.80667	2.68667	4.32667	3.37333	1632	297844808	XP_002890285.1	1482	4.4e-162	hypothetical protein ARALYDRAFT_472077 [Arabidopsis lyrata subsp. lyrata]>gi|297336127|gb|EFH66544.1| hypothetical protein ARALYDRAFT_472077 [Arabidopsis lyrata subsp. lyrata]	727434050	XM_010499951.1	901	0	PREDICTED: Camelina sativa transcription factor MYB51-like (LOC104775975), transcript variant X1, mRNA	K09422	MYBP	myb proto-oncogene protein, plant	http://www.genome.jp/dbget-bin/www_bget?ko:K09422	O49782	1484	3.6e-163	Transcription factor MYB51 OS=Arabidopsis thaliana GN=MYB51 PE=1 SV=2	PF09111	SLIDE	GO:0006338	chromatin remodeling	GO:0003677//GO:0003682//GO:0016818//GO:0003676//GO:0005524	DNA binding//chromatin binding//hydrolase activity, acting on acid anhydrides, in phosphorus-containing anhydrides//nucleic acid binding//ATP binding	GO:0005634//GO:0000785	nucleus//chromatin	--	--	FALSE	-0.73366	1	FALSE	-1.6336	0.32848	FALSE	-1.8869	0.12886	FALSE	-1.0663	1
	1-2k.c35820/1/2307	2.97333	1.16	0.476667	1.92	20.1933	21.75	27.0367	2228	565498674	XP_006306976.1	2426	2.1e-271	hypothetical protein CARUB_v10008551mg [Capsella rubella]>gi|482575687|gb|EOA39874.1| hypothetical protein CARUB_v10008551mg [Capsella rubella]	565498673	XM_006306914.1	1640	0	Capsella rubella hypothetical protein (CARUB_v10008551mg) mRNA, complete cds	K12133	LHY	MYB-related transcription factor LHY	http://www.genome.jp/dbget-bin/www_bget?ko:K12133	Q6R0H1	2406	6.1e-270	Protein LHY OS=Arabidopsis thaliana GN=LHY PE=1 SV=2	PF01484	Nematode cuticle collagen N-terminal domain	--	--	GO:0042302	structural constituent of cuticle	--	--	--	--	UP	5.8259	4.6853e-06	UP	3.1027	0.0015108	FALSE	-0.59933	1	UP	5.4911	3.6128e-14
	1-2k.c36743/1/1356	9.68333	7.46667	7.06333	12.3067	26.1533	18.26	19.41	1356	18414039	NP_568108.1	1094	3.6e-117	protein LHY/CCA1-like 1 [Arabidopsis thaliana]>gi|30679792|ref|NP_850756.1| protein LHY/CCA1-like 1 [Arabidopsis thaliana]>gi|75324470|sp|Q6R0G4.1|RVE4_ARATH RecName: Full=Protein REVEILLE 4; AltName: Full=Myb transcription factor LHY/CCA1-like 1>gi|41618932|gb|AAS09984.1| MYB transcription factor [Arabidopsis thaliana]>gi|62241824|emb|CAI77450.1| myb transcription factor LHY-CCA1-like1 [Arabidop…	727559767	XM_010453838.1	1017	0	PREDICTED: Camelina sativa protein REVEILLE 4 (LOC104734293), transcript variant X1, mRNA	--	--	--	--	Q6R0G4	1094	5e-118	Protein REVEILLE 4 OS=Arabidopsis thaliana GN=RVE4 PE=2 SV=1	--	--	GO:0009739//GO:0048573//GO:0009737//GO:0009733//GO:0009651//GO:0046686//GO:0009753//GO:0009751//GO:0006355//GO:0009723//GO:0007623	response to gibberellin//photoperiodism, flowering//response to abscisic acid//response to auxin//response to salt stress//response to cadmium ion//response to jasmonic acid//response to salicylic acid//regulation of transcription, DNA-templated//response to ethylene//circadian rhythm	GO:0003677//GO:0003700	DNA binding//transcription factor activity, sequence-specific DNA binding	GO:0005634//GO:0005667	nucleus//transcription factor complex	--	--	FALSE	1.4059	1	FALSE	0.96386	0.66949	FALSE	0.41477	1	UP	1.9142	0.040366
	1-2k.c36942/1/1967	8.65	6.39667	1.77333	2.09667	16.6233	41.3433	49.0133	1967	727452318	XP_010507962.1	2363	3.7e-264	PREDICTED: protein CCA1-like isoform X1 [Camelina sativa]>gi|727452320|ref|XP_010507963.1| PREDICTED: protein CCA1-like isoform X1 [Camelina sativa]	727472850	XM_010520062.1	1396	0	PREDICTED: Camelina sativa protein CCA1-like (LOC104793661), transcript variant X2, mRNA	K12134	CCA1	circadian clock associated 1	http://www.genome.jp/dbget-bin/www_bget?ko:K12134	P92973	2250	6.6e-252	Protein CCA1 OS=Arabidopsis thaliana GN=CCA1 PE=1 SV=1	--	--	--	--	--	--	--	--	--	--	UP	4.7416	5.3496e-05	UP	2.4427	0.0075967	FALSE	-2.008	0.14797	UP	3.2425	5.4551e-05
	1-2k.c4431/1/1740	2.71333	0.1	0.57	0	1.76	3.04	0.193333	1743	15239928	NP_196229.1	1232	4.6e-133	DnaJ and myb-like DNA-binding domain-containing protein [Arabidopsis thaliana]>gi|334187448|ref|NP_001190234.1| DnaJ and myb-like DNA-binding domain-containing protein [Arabidopsis thaliana]>gi|8978347|dbj|BAA98200.1| cell division related protein-like [Arabidopsis thaliana]>gi|332003584|gb|AED90967.1| DnaJ and myb-like DNA-binding domain-containing protein [Arabidopsis thaliana]>gi|332003585|gb|…	334187447	NM_001203305.1	1250	0	Arabidopsis thaliana DnaJ and myb-like DNA-binding domain-containing protein mRNA, complete cds	K09522	DNAJC2	DnaJ homolog subfamily C member 2	http://www.genome.jp/dbget-bin/www_bget?ko:K09522	Q6P2Y3	316	1.1e-27	DnaJ homolog subfamily C member 2 OS=Xenopus tropicalis GN=dnajc2 PE=2 SV=2	--	--	GO:0006457	protein folding	GO:0003677//GO:0031072	DNA binding//heat shock protein binding	GO:0005634	nucleus	KOG0724	Zuotin and related molecular chaperones (DnaJ superfamily), contains DNA-binding domains	FALSE	-1.6633	1	FALSE	-3.8636	0.20164	DOWN	#NAME?	0.0017558	FALSE	1.6406	1
	2-3k.c17886/1/2738	3.50667	1.70667	0.736667	2.08667	21.6133	21.81	25.32	2722	565498674	XP_006306976.1	2420	1.3e-270	hypothetical protein CARUB_v10008551mg [Capsella rubella]>gi|482575687|gb|EOA39874.1| hypothetical protein CARUB_v10008551mg [Capsella rubella]	565498673	XM_006306914.1	1664	0	Capsella rubella hypothetical protein (CARUB_v10008551mg) mRNA, complete cds	K12133	LHY	MYB-related transcription factor LHY	http://www.genome.jp/dbget-bin/www_bget?ko:K12133	Q6R0H1	2397	8.2e-269	Protein LHY OS=Arabidopsis thaliana GN=LHY PE=1 SV=2	PF01484	Nematode cuticle collagen N-terminal domain	--	--	GO:0042302	structural constituent of cuticle	--	--	--	--	UP	5.0467	4.6368e-05	UP	2.7614	0.0041845	FALSE	-0.71785	0.96495	UP	4.904	1.6997e-14
	2-3k.c18036/1/1351	13.6	9.94	9.44667	15.08	33.8233	36.1733	45.68	1349	565460688	XP_006288343.1	1102	4.2e-118	hypothetical protein CARUB_v10001591mg [Capsella rubella]>gi|482557049|gb|EOA21241.1| hypothetical protein CARUB_v10001591mg [Capsella rubella]	727559767	XM_010453838.1	927	0	PREDICTED: Camelina sativa protein REVEILLE 4 (LOC104734293), transcript variant X1, mRNA	--	--	--	--	Q6R0G4	1101	7.7e-119	Protein REVEILLE 4 OS=Arabidopsis thaliana GN=RVE4 PE=2 SV=1	--	--	--	--	--	--	--	--	--	--	FALSE	2.2411	0.29365	FALSE	1.7268	0.1227	FALSE	0.20486	1	UP	1.8663	0.024797
	2-3k.c18642/1/2966.1	1.33333	0.886667	0.38	1	14.4867	14.6233	17.64	2156	727429558	XP_010480703.1	1151	1.4e-123	PREDICTED: protein LHY isoform X2 [Camelina sativa]	727603299	XM_010476390.1	815	0	PREDICTED: Camelina sativa protein LHY (LOC104754250), transcript variant X3, mRNA	K12133	LHY	MYB-related transcription factor LHY	http://www.genome.jp/dbget-bin/www_bget?ko:K12133	Q6R0H1	1141	2.8e-123	Protein LHY OS=Arabidopsis thaliana GN=LHY PE=1 SV=2	PF01484//PF13361	Nematode cuticle collagen N-terminal domain//UvrD-like helicase C-terminal domain	--	--	GO:0016787//GO:0042302//GO:0005524	hydrolase activity//structural constituent of cuticle//ATP binding	--	--	--	--	UP	5.4204	0.00012815	UP	3.6503	0.00070298	FALSE	-0.35438	1	UP	5.2283	2.9658e-10
	2-3k.c18643/1/2883	3.39667	1.58	0.793333	2.42667	26.28	29.6933	34.6467	2810	565498674	XP_006306976.1	1422	6.9e-155	hypothetical protein CARUB_v10008551mg [Capsella rubella]>gi|482575687|gb|EOA39874.1| hypothetical protein CARUB_v10008551mg [Capsella rubella]	565498673	XM_006306914.1	1703	0	Capsella rubella hypothetical protein (CARUB_v10008551mg) mRNA, complete cds	K12133	LHY	MYB-related transcription factor LHY	http://www.genome.jp/dbget-bin/www_bget?ko:K12133	Q6R0H1	1410	2.4e-154	Protein LHY OS=Arabidopsis thaliana GN=LHY PE=1 SV=2	--	--	--	--	--	--	--	--	--	--	UP	5.3722	1.3544e-05	UP	3.2474	0.00090814	FALSE	-0.45525	1	UP	5.0716	3.1924e-17
	2-3k.c19326/1/1514	25.5767	53.0433	40.0567	45.0367	43.8667	14.04	10.43	1513	727500331	XP_010426206.1	1487	1.1e-162	PREDICTED: myb-related protein 306-like [Camelina sativa]	42565690	NM_114628.3	1059	0	Arabidopsis thaliana putative transcription factor MYB94 mRNA, complete cds	K09422	MYBP	myb proto-oncogene protein, plant	http://www.genome.jp/dbget-bin/www_bget?ko:K09422	P81392	783	6.5e-82	Myb-related protein 306 OS=Antirrhinum majus GN=MYB306 PE=2 SV=1	PF09111	SLIDE	GO:0006338	chromatin remodeling	GO:0005524//GO:0003676//GO:0016818	ATP binding//nucleic acid binding//hydrolase activity, acting on acid anhydrides, in phosphorus-containing anhydrides	GO:0005634	nucleus	--	--	FALSE	-2.0018	0.4928	FALSE	-1.402	0.37919	FALSE	0.85903	0.72716	FALSE	0.17647	1
	2-3k.c22392/1/3307	1.05333	0.99	6.66	9.01667	15.4667	1.59667	3.23333	3301	297818774	XP_002877270.1	2915	0	phosphoinositide phosphatase family protein [Arabidopsis lyrata subsp. lyrata]>gi|297323108|gb|EFH53529.1| phosphoinositide phosphatase family protein [Arabidopsis lyrata subsp. lyrata]	727443049	XM_010504732.1	1447	0	PREDICTED: Camelina sativa phosphoinositide phosphatase SAC3-like (LOC104780227), transcript variant X3, mRNA	--	--	--	--	Q7XZU2	2909	0	Phosphoinositide phosphatase SAC3 OS=Arabidopsis thaliana GN=SAC3 PE=2 SV=1	PF01355//PF02383	High potential iron-sulfur protein//SacI homology domain	GO:0019646//GO:0006118	aerobic electron transport chain//obsolete electron transport	GO:0042578//GO:0009055	phosphoric ester hydrolase activity//electron carrier activity	--	--	KOG1888	Putative phosphoinositide phosphatase	FALSE	-1.0275	1	FALSE	1.6439	0.4553	UP	3.1564	0.00028901	FALSE	1.2443	0.22989
	2-3k.c23192/1/1612	5.61	2.71333	2.15	2.07	1.41667	0.353333	0.303333	1609	565460688	XP_006288343.1	594	4.1e-59	hypothetical protein CARUB_v10001591mg [Capsella rubella]>gi|482557049|gb|EOA21241.1| hypothetical protein CARUB_v10001591mg [Capsella rubella]	565460687	XM_006288281.1	616	0	Capsella rubella hypothetical protein (CARUB_v10001591mg) mRNA, complete cds	--	--	--	--	Q6R0G4	590	1.7e-59	Protein REVEILLE 4 OS=Arabidopsis thaliana GN=RVE4 PE=2 SV=1	--	--	--	--	--	--	--	--	--	--	FALSE	-2.9453	1	DOWN	-4.3972	0.014571	FALSE	-1.3732	0.6147	FALSE	-0.50865	1
	2-3k.c23791/1/2939.1	0.49	0.0866667	0.143333	0.186667	3.42667	4.73667	4.21333	2091	565498674	XP_006306976.1	1758	5.6e-194	hypothetical protein CARUB_v10008551mg [Capsella rubella]>gi|482575687|gb|EOA39874.1| hypothetical protein CARUB_v10008551mg [Capsella rubella]	565498673	XM_006306914.1	1522	0	Capsella rubella hypothetical protein (CARUB_v10008551mg) mRNA, complete cds	K12133	LHY	MYB-related transcription factor LHY	http://www.genome.jp/dbget-bin/www_bget?ko:K12133	Q6R0H1	1714	1e-189	Protein LHY OS=Arabidopsis thaliana GN=LHY PE=1 SV=2	PF01484	Nematode cuticle collagen N-terminal domain	--	--	GO:0042302	structural constituent of cuticle	--	--	--	--	FALSE	4.8331	0.11041	FALSE	2.9823	0.12281	FALSE	-1.3944	1	UP	4.6294	0.025193
	2-3k.c2689/2/2958	68.2967	140.613	99.5433	116.303	143.22	101.837	106.873	2804	727427333	XP_010464230.1	2030	2.2e-225	PREDICTED: cytochrome P450 81D1-like [Camelina sativa]	665899259	AB904499.1	1411	0	Cloning vector pTACAtg1 DNA, complete sequence	--	--	--	--	Q9FDW1	1315	2.5e-143	Transcription factor MYB44 OS=Arabidopsis thaliana GN=MYB44 PE=2 SV=1	PF00067	Cytochrome P450	GO:0055114	oxidation-reduction process	GO:0020037//GO:0005506//GO:0016705	heme binding//iron ion binding//oxidoreductase activity, acting on paired donors, with incorporation or reduction of molecular oxygen	--	--	--	--	FALSE	0.084912	1	FALSE	0.64295	0.84242	FALSE	0.84806	0.44464	FALSE	0.56532	0.90591
	2-3k.c3410/1/2126	6.28	5.40667	1.13333	1.32	8.48	28.57	35.8667	2125	727472849	XP_010518363.1	2153	9e-240	PREDICTED: protein CCA1-like isoform X1 [Camelina sativa]>gi|727472851|ref|XP_010518364.1| PREDICTED: protein CCA1-like isoform X1 [Camelina sativa]	727452317	XM_010509660.1	1395	0	PREDICTED: Camelina sativa protein CCA1-like (LOC104784624), transcript variant X1, mRNA	K12134	CCA1	circadian clock associated 1	http://www.genome.jp/dbget-bin/www_bget?ko:K12134	P92973	2081	2.8e-232	Protein CCA1 OS=Arabidopsis thaliana GN=CCA1 PE=1 SV=1	--	--	--	--	--	--	--	--	--	--	UP	4.9553	4.7885e-05	UP	2.413	0.010778	FALSE	-2.2246	0.2326	UP	2.9587	0.0099276
	2-3k.c6431/1/3401.2	5.34333	8.83	5.11333	6.10333	14.2767	35.5467	30.4567	1098	8920588	AAF81310.1	1132	1.1e-121	Contains similarity to a dehydrogenase from Arabidopsis thaliana gb|Y12776 and contains a D-isomer specific 2-hydroxyacid dehydrogenases PF|00389 and Myb-like DNA binding PF|00249 domains. ESTs gb|Z48385, gb|Z48386 come from this gene [Arabidopsis thaliana]	727603412	XM_010476451.1	561	0	PREDICTED: Camelina sativa protein REVEILLE 3-like (LOC104754300), mRNA	--	--	--	--	Q6R0H0	1132	1.6e-122	Protein REVEILLE 3 OS=Arabidopsis thaliana GN=RVE3 PE=2 SV=1	--	--	--	--	--	--	--	--	--	--	FALSE	2.5332	0.29996	UP	2.4902	0.036262	FALSE	0.29614	1	FALSE	1.5473	0.68029
	2-3k.c6626/1/1221	14.4767	16.4567	100.757	128.187	209.763	16.4367	34.51	1244	727518352	XP_010435556.1	941	1.8e-99	PREDICTED: protein REVEILLE 2-like [Camelina sativa]	727518351	XM_010437254.1	657	0	PREDICTED: Camelina sativa protein REVEILLE 2-like (LOC104719342), mRNA	--	--	--	--	F4K5X6	868	7.4e-92	Protein REVEILLE 2 OS=Arabidopsis thaliana GN=RVE2 PE=2 SV=1	--	--	--	--	--	--	--	--	--	--	FALSE	-1.5315	0.89327	FALSE	1.3114	0.48112	UP	3.2346	6.6903e-07	FALSE	1.0774	0.14823
	2-3k.c7934/1/1131	72.1667	34.0667	30.1767	18.15	20.59	58.3933	42.9867	1143	685271248	XP_009126663.1	890	1.4e-93	PREDICTED: transcription factor MYB59-like isoform X1 [Brassica rapa]	565435155	XM_006281137.1	874	0	Capsella rubella hypothetical protein (CARUB_v10027237mg) mRNA, complete cds	K09422	MYBP	myb proto-oncogene protein, plant	http://www.genome.jp/dbget-bin/www_bget?ko:K09422	Q4JL84	842	7.1e-89	Transcription factor MYB59 OS=Arabidopsis thaliana GN=MYB59 PE=2 SV=2	PF09111	SLIDE	GO:0006338	chromatin remodeling	GO:0016818//GO:0003676//GO:0005524	hydrolase activity, acting on acid anhydrides, in phosphorus-containing anhydrides//nucleic acid binding//ATP binding	GO:0005634	nucleus	--	--	FALSE	0.44455	1	FALSE	-0.83333	0.6703	DOWN	-1.9228	0.011134	FALSE	-0.48656	1
	3-6k.c11594/7/3837	1.65	0.38	0.56	0.923333	0.673333	0.286667	0.01	3828	297835114	XP_002885439.1	5119	0	always early protein 3 [Arabidopsis lyrata subsp. lyrata]>gi|297331279|gb|EFH61698.1| always early protein 3 [Arabidopsis lyrata subsp. lyrata]	297835113	XM_002885393.1	2787	0	Arabidopsis lyrata subsp. lyrata always early protein 3, mRNA	--	--	--	--	Q6A332	5015	0	Protein ALWAYS EARLY 3 OS=Arabidopsis thaliana GN=ALY3 PE=1 SV=1	PF06584	DIRP	GO:0007049//GO:0006351	cell cycle//transcription, DNA-templated	GO:0003682//GO:0003677	chromatin binding//DNA binding	GO:0000785//GO:0017053	chromatin//transcriptional repressor complex	KOG1019	Retinoblastoma pathway protein LIN-9/chromatin-associated protein Aly	FALSE	-5.6454	1	DOWN	-7.0603	0.0025058	FALSE	-0.75464	0.987	FALSE	0.23515	1
	3-6k.c15977/1/2601	0.11	0.0866667	0	0.156667	2.59333	2.31	2.8	2596	565498674	XP_006306976.1	2085	8.4e-232	hypothetical protein CARUB_v10008551mg [Capsella rubella]>gi|482575687|gb|EOA39874.1| hypothetical protein CARUB_v10008551mg [Capsella rubella]	565498673	XM_006306914.1	1744	0	Capsella rubella hypothetical protein (CARUB_v10008551mg) mRNA, complete cds	K12133	LHY	MYB-related transcription factor LHY	http://www.genome.jp/dbget-bin/www_bget?ko:K12133	Q6R0H1	2058	1.6e-229	Protein LHY OS=Arabidopsis thaliana GN=LHY PE=1 SV=2	PF01484	Nematode cuticle collagen N-terminal domain	--	--	GO:0042302	structural constituent of cuticle	--	--	--	--	UP	Inf	0.004474	UP	4.6546	0.02319	FALSE	0.607	1	UP	Inf	0.00010076
	3-6k.c1754/5/3955	0.546667	0	0.863333	1.81	1.14667	1.22333	1.60667	3932	297835114	XP_002885439.1	5119	0	always early protein 3 [Arabidopsis lyrata subsp. lyrata]>gi|297331279|gb|EFH61698.1| always early protein 3 [Arabidopsis lyrata subsp. lyrata]	297835113	XM_002885393.1	2784	0	Arabidopsis lyrata subsp. lyrata always early protein 3, mRNA	--	--	--	--	Q6A332	5015	0	Protein ALWAYS EARLY 3 OS=Arabidopsis thaliana GN=ALY3 PE=1 SV=1	PF06584	DIRP	GO:0007049//GO:0006351	cell cycle//transcription, DNA-templated	GO:0003682//GO:0003677	chromatin binding//DNA binding	GO:0000785//GO:0017053	chromatin//transcriptional repressor complex	KOG1019	Retinoblastoma pathway protein LIN-9/chromatin-associated protein Aly	FALSE	0.85092	1	FALSE	1.5411	0.66744	FALSE	1.8447	0.41786	FALSE	0.47479	1
	3-6k.c18020/1/5563	0.43	0.496667	0	0.146667	0.07	0.326667	2.17667	2758	565465046	XP_006290487.1	3718	0	hypothetical protein CARUB_v10016562mg [Capsella rubella]>gi|482559194|gb|EOA23385.1| hypothetical protein CARUB_v10016562mg [Capsella rubella]	565465045	XM_006290425.1	2169	0	Capsella rubella hypothetical protein (CARUB_v10016562mg) mRNA, complete cds	K04650	NCOR1, N-CoR	nuclear receptor co-repressor 1	http://www.genome.jp/dbget-bin/www_bget?ko:K04650	Q60974	212	1.9e-15	Nuclear receptor corepressor 1 OS=Mus musculus GN=Ncor1 PE=1 SV=1	--	--	--	--	--	--	--	--	KOG1878	Nuclear receptor coregulator SMRT/SMRTER, contains Myb-like domains	UP	Inf	0.037125	FALSE	2.3036	0.51428	FALSE	-1.5344	1	FALSE	Inf	1
	3-6k.c18181/2/3933	0.07	2.52	1.84333	3.86	0.05	3.04	3.21333	3928	727444876	XP_010503962.1	5488	0	PREDICTED: uncharacterized protein LOC104781070 [Camelina sativa]	727444875	XM_010505660.1	3114	0	PREDICTED: Camelina sativa uncharacterized LOC104781070 (LOC104781070), mRNA	K04650	NCOR1, N-CoR	nuclear receptor co-repressor 1	http://www.genome.jp/dbget-bin/www_bget?ko:K04650	Q60974	221	2.5e-16	Nuclear receptor corepressor 1 OS=Mus musculus GN=Ncor1 PE=1 SV=1	--	--	--	--	--	--	--	--	KOG1878	Nuclear receptor coregulator SMRT/SMRTER, contains Myb-like domains	FALSE	0.76879	1	UP	5.6107	0.035661	UP	5.8462	0.036168	FALSE	-5.1704	1
	3-6k.c20054/1/2535	6.28333	5.91333	0.2	0.88	7.35667	14.4033	10.3167	2530	727472849	XP_010518363.1	1742	4.9e-192	PREDICTED: protein CCA1-like isoform X1 [Camelina sativa]>gi|727472851|ref|XP_010518364.1| PREDICTED: protein CCA1-like isoform X1 [Camelina sativa]	727472850	XM_010520062.1	1165	0	PREDICTED: Camelina sativa protein CCA1-like (LOC104793661), transcript variant X2, mRNA	K12134	CCA1	circadian clock associated 1	http://www.genome.jp/dbget-bin/www_bget?ko:K12134	P92973	1660	2.2e-183	Protein CCA1 OS=Arabidopsis thaliana GN=CCA1 PE=1 SV=1	--	--	--	--	--	--	--	--	--	--	UP	5.6633	0.0003369	FALSE	0.61911	0.92414	DOWN	-2.776	0.014875	UP	5.2728	8.9207e-07
	3-6k.c4083/1/4038	0.693333	0.29	0	1.55667	0	1.12	1.95333	1941	297835114	XP_002885439.1	2499	6.2e-280	always early protein 3 [Arabidopsis lyrata subsp. lyrata]>gi|297331279|gb|EFH61698.1| always early protein 3 [Arabidopsis lyrata subsp. lyrata]	297835113	XM_002885393.1	1353	0	Arabidopsis lyrata subsp. lyrata always early protein 3, mRNA	--	--	--	--	Q6A332	2413	8.2e-271	Protein ALWAYS EARLY 3 OS=Arabidopsis thaliana GN=ALY3 PE=1 SV=1	--	--	--	--	GO:0003682//GO:0003677	chromatin binding//DNA binding	GO:0000785	chromatin	--	--	FALSE	Inf	0.10581	FALSE	1.4257	0.81014	FALSE	1.0937	1	FALSE	NA	NA
HB	1-2k.c11147/1/2501	15.9167	16.26	25.2133	22.4933	19.6667	9.87333	5	2500	565471976	XP_006293790.1	2685	2.2e-301	hypothetical protein CARUB_v10022772mg [Capsella rubella]>gi|482562498|gb|EOA26688.1| hypothetical protein CARUB_v10022772mg [Capsella rubella]	727447068	XM_010506819.1	1921	0	PREDICTED: Camelina sativa BEL1-like homeodomain protein 1 (LOC104782008), mRNA	--	--	--	--	Q9SJ56	2616	3e-294	BEL1-like homeodomain protein 1 OS=Arabidopsis thaliana GN=BLH1 PE=1 SV=1	PF00046//PF01736//PF08414//PF05920	Homeobox domain//Polyomavirus agnoprotein//Respiratory burst NADPH oxidase//Homeobox KN domain	GO:0006804//GO:0006979//GO:0006355//GO:0055114	obsolete peroxidase reaction//response to oxidative stress//regulation of transcription, DNA-templated//oxidation-reduction process	GO:0003677//GO:0050664//GO:0004601	DNA binding//oxidoreductase activity, acting on NAD(P)H, oxygen as acceptor//peroxidase activity	--	--	--	--	FALSE	-2.3884	0.18547	FALSE	-1.7375	0.14566	FALSE	0.57282	0.85616	FALSE	-0.31352	1
	1-2k.c1480/5/2171	33.9667	32.3667	43.6967	28.49	52.92	15.77	9.70667	2118	297842285	XP_002889024.1	2161	1.1e-240	hypothetical protein ARALYDRAFT_476691 [Arabidopsis lyrata subsp. lyrata]>gi|297334865|gb|EFH65283.1| hypothetical protein ARALYDRAFT_476691 [Arabidopsis lyrata subsp. lyrata]	297842284	XM_002888978.1	1509	0	Arabidopsis lyrata subsp. lyrata hypothetical protein, mRNA	--	--	--	--	Q9FWS9	2105	4.6e-235	BEL1-like homeodomain protein 3 OS=Arabidopsis thaliana GN=BLH3 PE=1 SV=1	PF04810//PF05920//PF00046	Sec23/Sec24 zinc finger//Homeobox KN domain//Homeobox domain	GO:0006355//GO:0006886//GO:0006888	regulation of transcription, DNA-templated//intracellular protein transport//ER to Golgi vesicle-mediated transport	GO:0043565//GO:0003700//GO:0008270//GO:0003677	sequence-specific DNA binding//transcription factor activity, sequence-specific DNA binding//zinc ion binding//DNA binding	GO:0030127//GO:0005667//GO:0005634	COPII vesicle coat//transcription factor complex//nucleus	--	--	FALSE	-2.2601	1	FALSE	-1.954	0.10619	FALSE	-0.14903	1	FALSE	0.35228	1
	1-2k.c16411/1/1648.1	104.927	328.403	426.37	465.953	432.67	242.9	222.92	1035	727475065	XP_010413333.1	1110	3.8e-119	PREDICTED: homeobox-leucine zipper protein ATHB-12 [Camelina sativa]	297821071	XM_002878373.1	642	0	Arabidopsis lyrata subsp. lyrata ATHB-12, mRNA	K09338	HD-ZIP	homeobox-leucine zipper protein	http://www.genome.jp/dbget-bin/www_bget?ko:K09338	Q9M276	1095	2.9e-118	Homeobox-leucine zipper protein ATHB-12 OS=Arabidopsis thaliana GN=ATHB-12 PE=2 SV=1	PF05920//PF02183//PF00046//PF06657//PF01527//PF10473	Homeobox KN domain//Homeobox associated leucine zipper//Homeobox domain//Centrosome microtubule-binding domain of Cep57//Transposase//Leucine-rich repeats of kinetochore protein Cenp-F/LEK1	GO:0006355//GO:0006313	regulation of transcription, DNA-templated//transposition, DNA-mediated	GO:0003700//GO:0008134//GO:0004803//GO:0043565//GO:0003677//GO:0045502//GO:0008017//GO:0042803	transcription factor activity, sequence-specific DNA binding//transcription factor binding//transposase activity//sequence-specific DNA binding//DNA binding//dynein binding//microtubule binding//protein homodimerization activity	GO:0045298//GO:0030286//GO:0005667	tubulin complex//dynein complex//transcription factor complex	--	--	FALSE	-0.96884	1	FALSE	1.0979	0.47076	UP	2.2595	0.00034877	FALSE	0.05648	1
	1-2k.c21842/2/1662	28.54	29.29	21.4833	16.9233	11.7333	29.1367	18.9567	1662	565459822	XP_006287910.1	1640	2.1e-180	hypothetical protein CARUB_v10001144mg [Capsella rubella]>gi|482556616|gb|EOA20808.1| hypothetical protein CARUB_v10001144mg [Capsella rubella]	727640938	XM_010493499.1	1039	0	PREDICTED: Camelina sativa homeobox protein knotted-1-like 4 (LOC104769322), transcript variant X1, mRNA	--	--	--	--	P48001	1587	4.2e-175	Homeobox protein knotted-1-like 4 OS=Arabidopsis thaliana GN=KNAT4 PE=1 SV=3	PF03791//PF00046//PF03789//PF05920//PF03790	KNOX2 domain//Homeobox domain//ELK domain//Homeobox KN domain//KNOX1 domain	GO:0006355	regulation of transcription, DNA-templated	GO:0003677	DNA binding	GO:0005634	nucleus	--	--	FALSE	-0.20222	1	FALSE	-0.56715	0.9183	FALSE	-0.65058	0.79143	FALSE	-0.8371	0.88322
	1-2k.c23304/1/2286	17.82	13.8433	11.79	4.74	10.4767	2.68667	2.34333	2289	297817426	XP_002876596.1	3322	0	hypothetical protein ARALYDRAFT_324546 [Arabidopsis lyrata subsp. lyrata]>gi|297322434|gb|EFH52855.1| hypothetical protein ARALYDRAFT_324546 [Arabidopsis lyrata subsp. lyrata]	145339725	NM_115979.4	1703	0	Arabidopsis thaliana homeodomain GLABROUS 1 mRNA, complete cds	K09338	HD-ZIP	homeobox-leucine zipper protein	http://www.genome.jp/dbget-bin/www_bget?ko:K09338	Q9M2E8	3308	0	Homeobox-leucine zipper protein HDG1 OS=Arabidopsis thaliana GN=HDG1 PE=2 SV=1	PF05920//PF01852//PF00046//PF02183//PF06156	Homeobox KN domain//START domain//Homeobox domain//Homeobox associated leucine zipper//Protein of unknown function (DUF972)	GO:0006355//GO:0006260	regulation of transcription, DNA-templated//DNA replication	GO:0003677//GO:0043565//GO:0003700//GO:0008289	DNA binding//sequence-specific DNA binding//transcription factor activity, sequence-specific DNA binding//lipid binding	GO:0005667//GO:0005634	transcription factor complex//nucleus	--	--	FALSE	-2.4417	0.93094	DOWN	-3.0962	0.0022212	FALSE	-1.7994	0.075252	FALSE	-0.094583	1
	1-2k.c30546/1/1704	109.303	383.833	432.737	448.937	358.4	237.643	187.233	1031	727475065	XP_010413333.1	1075	4.4e-115	PREDICTED: homeobox-leucine zipper protein ATHB-12 [Camelina sativa]	297821071	XM_002878373.1	696	0	Arabidopsis lyrata subsp. lyrata ATHB-12, mRNA	K09338	HD-ZIP	homeobox-leucine zipper protein	http://www.genome.jp/dbget-bin/www_bget?ko:K09338	Q9M276	1054	1.7e-113	Homeobox-leucine zipper protein ATHB-12 OS=Arabidopsis thaliana GN=ATHB-12 PE=2 SV=1	PF01527//PF10473//PF08912//PF00046//PF02183//PF05920	Transposase//Leucine-rich repeats of kinetochore protein Cenp-F/LEK1//Rho Binding//Homeobox domain//Homeobox associated leucine zipper//Homeobox KN domain	GO:0006313//GO:0006355	transposition, DNA-mediated//regulation of transcription, DNA-templated	GO:0045502//GO:0042803//GO:0003677//GO:0017048//GO:0004803//GO:0043565//GO:0003700//GO:0008134	dynein binding//protein homodimerization activity//DNA binding//Rho GTPase binding//transposase activity//sequence-specific DNA binding//transcription factor activity, sequence-specific DNA binding//transcription factor binding	GO:0005667//GO:0030286	transcription factor complex//dynein complex	--	--	FALSE	-1.2514	1	FALSE	0.75951	0.72844	UP	2.1213	0.00079405	FALSE	-0.23923	1
	1-2k.c3196/1/1393	43.38	28.3833	43.6667	27.7567	34.68	14.2133	8.31	1400	565483972	XP_006299626.1	1130	2.5e-121	hypothetical protein CARUB_v10015805mg [Capsella rubella]>gi|482568335|gb|EOA32524.1| hypothetical protein CARUB_v10015805mg [Capsella rubella]	727651219	XM_010498008.1	656	0	PREDICTED: Camelina sativa homeobox-leucine zipper protein HAT5-like (LOC104773404), mRNA	K09338	HD-ZIP	homeobox-leucine zipper protein	http://www.genome.jp/dbget-bin/www_bget?ko:K09338	Q02283	1107	1.6e-119	Homeobox-leucine zipper protein HAT5 OS=Arabidopsis thaliana GN=HAT5 PE=1 SV=1	PF06156//PF02183//PF00046//PF05920	Protein of unknown function (DUF972)//Homeobox associated leucine zipper//Homeobox domain//Homeobox KN domain	GO:0006355//GO:0006260	regulation of transcription, DNA-templated//DNA replication	GO:0043565//GO:0003677//GO:0003700	sequence-specific DNA binding//DNA binding//transcription factor activity, sequence-specific DNA binding	GO:0005667	transcription factor complex	--	--	FALSE	-2.4705	0.52291	DOWN	-2.4886	0.013348	FALSE	-0.55373	0.87165	FALSE	-0.24991	1
	1-2k.c32136/1/1412	0	2.35667	12.9233	28.3667	0	26.85	23.7367	1414	565471976	XP_006293790.1	1608	9.4e-177	hypothetical protein CARUB_v10022772mg [Capsella rubella]>gi|482562498|gb|EOA26688.1| hypothetical protein CARUB_v10022772mg [Capsella rubella]	297827074	XM_002881374.1	1129	0	Arabidopsis lyrata subsp. lyrata hypothetical protein, mRNA	--	--	--	--	Q9SJ56	1599	1.5e-176	BEL1-like homeodomain protein 1 OS=Arabidopsis thaliana GN=BLH1 PE=1 SV=1	PF00046//PF05920	Homeobox domain//Homeobox KN domain	GO:0006355	regulation of transcription, DNA-templated	GO:0003677	DNA binding	--	--	--	--	FALSE	0.85779	1	UP	Inf	0.0027979	UP	Inf	0.00036444	FALSE	#NAME?	0.62727
	1-2k.c35962/2/1923	0	15.3967	13.7667	27.17	0	21.92	20.0433	1933	297842285	XP_002889024.1	2161	9.7e-241	hypothetical protein ARALYDRAFT_476691 [Arabidopsis lyrata subsp. lyrata]>gi|297334865|gb|EFH65283.1| hypothetical protein ARALYDRAFT_476691 [Arabidopsis lyrata subsp. lyrata]	297842284	XM_002888978.1	1415	0	Arabidopsis lyrata subsp. lyrata hypothetical protein, mRNA	--	--	--	--	Q9FWS9	2105	4.2e-235	BEL1-like homeodomain protein 3 OS=Arabidopsis thaliana GN=BLH3 PE=1 SV=1	PF00046//PF04810//PF05920	Homeobox domain//Sec23/Sec24 zinc finger//Homeobox KN domain	GO:0006886//GO:0006888//GO:0006355	intracellular protein transport//ER to Golgi vesicle-mediated transport//regulation of transcription, DNA-templated	GO:0003677//GO:0043565//GO:0003700//GO:0008270	DNA binding//sequence-specific DNA binding//transcription factor activity, sequence-specific DNA binding//zinc ion binding	GO:0005667//GO:0005634//GO:0030127	transcription factor complex//nucleus//COPII vesicle coat	--	--	FALSE	0.50514	1	UP	Inf	0.00042288	UP	Inf	0.00022968	FALSE	#NAME?	0.56727
	1-2k.c4618/1/1237	165.04	107.42	66.9033	48.8433	29.8533	55.52	34.61	1222	15236109	NP_195716.1	1145	3.9e-123	homeobox-leucine zipper protein ATHB-16 [Arabidopsis thaliana]>gi|118573192|sp|Q940J1.2|ATB16_ARATH RecName: Full=Homeobox-leucine zipper protein ATHB-16; AltName: Full=HD-ZIP protein ATHB-16; AltName: Full=Homeodomain transcription factor ATHB-16>gi|5668909|gb|AAD46064.1|AF076641_1 homeodomain leucine-zipper protein ATHB16 [Arabidopsis thaliana]>gi|13877723|gb|AAK43939.1|AF370620_1 homeodomain-l…	297798039	XM_002866858.1	696	0	Arabidopsis lyrata subsp. lyrata ATHB16, mRNA	K09338	HD-ZIP	homeobox-leucine zipper protein	http://www.genome.jp/dbget-bin/www_bget?ko:K09338	Q940J1	1145	5.5e-124	Homeobox-leucine zipper protein ATHB-16 OS=Arabidopsis thaliana GN=ATHB-16 PE=2 SV=2	PF08172//PF05920//PF11365//PF00046//PF02183//PF10186//PF04111//PF06156	CASP C terminal//Homeobox KN domain//Protein of unknown function (DUF3166)//Homeobox domain//Homeobox associated leucine zipper//Vacuolar sorting 38 and autophagy-related subunit 14//Autophagy protein Apg6//Protein of unknown function (DUF972)	GO:0010508//GO:0006355//GO:0006891//GO:0045893//GO:0048510//GO:0006260//GO:0048573//GO:0009637//GO:0030308//GO:0006914//GO:0010506	positive regulation of autophagy//regulation of transcription, DNA-templated//intra-Golgi vesicle-mediated transport//positive regulation of transcription, DNA-templated//regulation of timing of transition from vegetative to reproductive phase//DNA replication//photoperiodism, flowering//response to blue light//negative regulation of cell growth//autophagy//regulation of autophagy	GO:0043565//GO:0003677//GO:0003700//GO:0000976	sequence-specific DNA binding//DNA binding//transcription factor activity, sequence-specific DNA binding//transcription regulatory region sequence-specific DNA binding	GO:0030173//GO:0005615//GO:0005634//GO:0005667	integral component of Golgi membrane//extracellular space//nucleus//transcription factor complex	--	--	FALSE	-1.0291	1	DOWN	-2.3394	0.011335	DOWN	-1.6937	0.015904	FALSE	-1.1214	0.25493
	1-2k.c5729/1/2292	8.32667	5.06667	11.9833	18.2	1.67667	2.70333	5.65	2293	565471976	XP_006293790.1	2654	7.8e-298	hypothetical protein CARUB_v10022772mg [Capsella rubella]>gi|482562498|gb|EOA26688.1| hypothetical protein CARUB_v10022772mg [Capsella rubella]	727447068	XM_010506819.1	1838	0	PREDICTED: Camelina sativa BEL1-like homeodomain protein 1 (LOC104782008), mRNA	--	--	--	--	Q9SJ56	2585	1.1e-290	BEL1-like homeodomain protein 1 OS=Arabidopsis thaliana GN=BLH1 PE=1 SV=1	PF01736//PF00046//PF08414//PF05920	Polyomavirus agnoprotein//Homeobox domain//Respiratory burst NADPH oxidase//Homeobox KN domain	GO:0006355//GO:0006804//GO:0006979//GO:0055114	regulation of transcription, DNA-templated//obsolete peroxidase reaction//response to oxidative stress//oxidation-reduction process	GO:0003677//GO:0004601//GO:0050664	DNA binding//peroxidase activity//oxidoreductase activity, acting on NAD(P)H, oxygen as acceptor	--	--	--	--	FALSE	-1.0296	1	FALSE	-0.54972	1	FALSE	1.1083	0.40676	DOWN	-2.8175	0.036891
	1-2k.c6854/2/2024	1.45	3.51333	2.97333	1.48333	2.51333	2.63	0	2015	297842285	XP_002889024.1	2012	1.9e-223	hypothetical protein ARALYDRAFT_476691 [Arabidopsis lyrata subsp. lyrata]>gi|297334865|gb|EFH65283.1| hypothetical protein ARALYDRAFT_476691 [Arabidopsis lyrata subsp. lyrata]	297842284	XM_002888978.1	1351	0	Arabidopsis lyrata subsp. lyrata hypothetical protein, mRNA	--	--	--	--	Q9FWS9	1994	3.3e-222	BEL1-like homeodomain protein 3 OS=Arabidopsis thaliana GN=BLH3 PE=1 SV=1	PF00046//PF05920//PF05680	Homeobox domain//Homeobox KN domain//ATP synthase E chain	GO:0015992//GO:0015986//GO:0006355	proton transport//ATP synthesis coupled proton transport//regulation of transcription, DNA-templated	GO:0003677//GO:0043565//GO:0003700//GO:0015078	DNA binding//sequence-specific DNA binding//transcription factor activity, sequence-specific DNA binding//hydrogen ion transmembrane transporter activity	GO:0005667//GO:0005634//GO:0000276	transcription factor complex//nucleus//mitochondrial proton-transporting ATP synthase complex, coupling factor F(o)	--	--	FALSE	#NAME?	1	FALSE	#NAME?	0.062808	FALSE	0.17978	1	FALSE	-0.31206	1
	1-2k.c8958/2/1778	42.6633	40.3767	56.8267	28.6433	68.7667	21.5667	17.17	1779	565471976	XP_006293790.1	2082	1.3e-231	hypothetical protein CARUB_v10022772mg [Capsella rubella]>gi|482562498|gb|EOA26688.1| hypothetical protein CARUB_v10022772mg [Capsella rubella]	297827074	XM_002881374.1	1454	0	Arabidopsis lyrata subsp. lyrata hypothetical protein, mRNA	--	--	--	--	Q9SJ56	2059	8.4e-230	BEL1-like homeodomain protein 1 OS=Arabidopsis thaliana GN=BLH1 PE=1 SV=1	PF04625//PF08414//PF00038//PF00046//PF05920	DEC-1 protein, N-terminal region//Respiratory burst NADPH oxidase//Intermediate filament protein//Homeobox domain//Homeobox KN domain	GO:0055114//GO:0006355//GO:0007304//GO:0006804//GO:0006979	oxidation-reduction process//regulation of transcription, DNA-templated//chorion-containing eggshell formation//obsolete peroxidase reaction//response to oxidative stress	GO:0004601//GO:0050664//GO:0005213//GO:0005198//GO:0003677	peroxidase activity//oxidoreductase activity, acting on NAD(P)H, oxygen as acceptor//structural constituent of chorion//structural molecule activity//DNA binding	GO:0005576//GO:0042600//GO:0005882	extracellular region//chorion//intermediate filament	--	--	FALSE	-1.8407	1	FALSE	-1.4741	0.29422	FALSE	-0.45406	1	FALSE	0.3503	1
	2-3k.c10817/2/2868	4.06	2.42667	0.696667	0.396667	2.69	0.75	1.79667	2870	727566829	XP_010455798.1	3720	0	PREDICTED: homeobox-leucine zipper protein PROTODERMAL FACTOR 2 isoform X1 [Camelina sativa]>gi|727566831|ref|XP_010455799.1| PREDICTED: homeobox-leucine zipper protein PROTODERMAL FACTOR 2 isoform X1 [Camelina sativa]>gi|727566833|ref|XP_010455800.1| PREDICTED: homeobox-leucine zipper protein PROTODERMAL FACTOR 2 isoform X2 [Camelina sativa]>gi|727566835|ref|XP_010455802.1| PREDICTED: homeobox-l…	727492597	XM_010424027.1	2186	0	PREDICTED: Camelina sativa homeobox-leucine zipper protein PROTODERMAL FACTOR 2-like (LOC104707645), transcript variant X2, mRNA	K09338	HD-ZIP	homeobox-leucine zipper protein	http://www.genome.jp/dbget-bin/www_bget?ko:K09338	Q93V99	3720	0	Homeobox-leucine zipper protein PROTODERMAL FACTOR 2 OS=Arabidopsis thaliana GN=PDF2 PE=2 SV=1	PF05920//PF01852//PF00046//PF02183	Homeobox KN domain//START domain//Homeobox domain//Homeobox associated leucine zipper	GO:0006355	regulation of transcription, DNA-templated	GO:0043565//GO:0003700//GO:0008289//GO:0003677	sequence-specific DNA binding//transcription factor activity, sequence-specific DNA binding//lipid binding//DNA binding	GO:0005667	transcription factor complex	--	--	FALSE	1.3484	1	FALSE	-1.3021	0.55685	DOWN	-3.2348	0.012133	FALSE	2.0888	0.58988
	2-3k.c11278/1/3195	0	0.806667	0.596667	1.73333	0	1.3	0.773333	3203	727528349	XP_010439429.1	3580	0	PREDICTED: homeobox-leucine zipper protein MERISTEM L1 [Camelina sativa]>gi|727528351|ref|XP_010439430.1| PREDICTED: homeobox-leucine zipper protein MERISTEM L1 [Camelina sativa]	145323159	NM_001036615.2	2059	0	Arabidopsis thaliana homeobox-leucine zipper protein MERISTEM L1 mRNA, complete cds	K09338	HD-ZIP	homeobox-leucine zipper protein	http://www.genome.jp/dbget-bin/www_bget?ko:K09338	Q8RWU4	3550	0	Homeobox-leucine zipper protein MERISTEM L1 OS=Arabidopsis thaliana GN=ATML1 PE=2 SV=1	PF01852//PF05920//PF02183//PF00046	START domain//Homeobox KN domain//Homeobox associated leucine zipper//Homeobox domain	GO:0006355	regulation of transcription, DNA-templated	GO:0008289//GO:0003700//GO:0003677//GO:0043565	lipid binding//transcription factor activity, sequence-specific DNA binding//DNA binding//sequence-specific DNA binding	GO:0005667	transcription factor complex	--	--	FALSE	0.28149	1	FALSE	Inf	0.082341	UP	Inf	0.0056691	FALSE	#NAME?	0.91744
	2-3k.c17845/1/1019	34.9867	41.85	22.28	9.67	13.0133	22.04	14.9267	1031	15235882	NP_193411.1	1077	2.6e-115	homeobox protein 2 [Arabidopsis thaliana]>gi|462281|sp|Q05466.1|HAT4_ARATH RecName: Full=Homeobox-leucine zipper protein HAT4; AltName: Full=HD-ZIP protein ATHB-2; AltName: Full=Homeodomain transcription factor ATHB-2; AltName: Full=Homeodomain-leucine zipper protein HAT4; Short=HD-ZIP protein 4>gi|14030725|gb|AAK53037.1|AF375453_1 AT4g16780/dl4415w [Arabidopsis thaliana]>gi|16180|emb|CAA48246.1|…	727530167	XM_010441797.1	740	0	PREDICTED: Camelina sativa homeobox-leucine zipper protein HAT4 (LOC104723423), mRNA	K09338	HD-ZIP	homeobox-leucine zipper protein	http://www.genome.jp/dbget-bin/www_bget?ko:K09338	Q05466	1077	3.6e-116	Homeobox-leucine zipper protein HAT4 OS=Arabidopsis thaliana GN=HAT4 PE=1 SV=1	PF04618//PF05920//PF00046//PF02183	HD-ZIP protein N terminus//Homeobox KN domain//Homeobox domain//Homeobox associated leucine zipper	GO:0009641//GO:0009735//GO:0048364//GO:0009733//GO:0008283//GO:0045892//GO:0010218//GO:0010016//GO:0009826//GO:0010017//GO:0006355	shade avoidance//response to cytokinin//root development//response to auxin//cell proliferation//negative regulation of transcription, DNA-templated//response to far red light//shoot system morphogenesis//unidimensional cell growth//red or far-red light signaling pathway//regulation of transcription, DNA-templated	GO:0042803//GO:0003700//GO:0003677//GO:0043565	protein homodimerization activity//transcription factor activity, sequence-specific DNA binding//DNA binding//sequence-specific DNA binding	GO:0005667//GO:0005634	transcription factor complex//nucleus	--	--	FALSE	-0.57786	1	FALSE	-1.2502	0.48553	FALSE	-1.7736	0.076226	FALSE	-0.70093	1
	2-3k.c17967/1/2866	0	1.25333	0.463333	1.14333	0	1.54667	1.91	3126	297805504	XP_002870636.1	1367	1.8e-148	hypothetical protein ARALYDRAFT_493837 [Arabidopsis lyrata subsp. lyrata]>gi|297316472|gb|EFH46895.1| hypothetical protein ARALYDRAFT_493837 [Arabidopsis lyrata subsp. lyrata]	727423777	XM_010449189.1	1130	0	PREDICTED: Camelina sativa homeobox protein BEL1 homolog (LOC104730093), mRNA	--	--	--	--	Q38897	1314	3.6e-143	Homeobox protein BEL1 homolog OS=Arabidopsis thaliana GN=BEL1 PE=1 SV=2	--	--	--	--	--	--	--	--	--	--	FALSE	2.0191	1	UP	Inf	0.0078444	UP	Inf	0.0093728	FALSE	#NAME?	0.94593
	2-3k.c18656/1/3181.1	0	1.23	0.406667	0	1.54	0.71	0.823333	1990	727487197	XP_010419627.1	2662	8e-299	PREDICTED: homeobox-leucine zipper protein ANTHOCYANINLESS 2-like [Camelina sativa]>gi|727487199|ref|XP_010419628.1| PREDICTED: homeobox-leucine zipper protein ANTHOCYANINLESS 2-like [Camelina sativa]	727567698	XM_010457948.1	1413	0	PREDICTED: Camelina sativa homeobox-leucine zipper protein ANTHOCYANINLESS 2-like (LOC104737707), mRNA	--	--	--	--	Q0WV12	2641	3e-297	Homeobox-leucine zipper protein ANTHOCYANINLESS 2 OS=Arabidopsis thaliana GN=ANL2 PE=2 SV=1	PF00046//PF05920//PF00060//PF01852	Homeobox domain//Homeobox KN domain//Ligand-gated ion channel//START domain	GO:0007165//GO:0006811//GO:0007268//GO:0006355	signal transduction//ion transport//synaptic transmission//regulation of transcription, DNA-templated	GO:0003677//GO:0004970//GO:0008289	DNA binding//ionotropic glutamate receptor activity//lipid binding	GO:0016020	membrane	--	--	FALSE	1.0125	1	FALSE	Inf	0.23407	FALSE	NA	NA	FALSE	1.9244	1
	2-3k.c1887/4/2892	4.55	3.07333	0.873333	0.286667	4.82333	2.33	0.343333	2885	727566829	XP_010455798.1	3720	0	PREDICTED: homeobox-leucine zipper protein PROTODERMAL FACTOR 2 isoform X1 [Camelina sativa]>gi|727566831|ref|XP_010455799.1| PREDICTED: homeobox-leucine zipper protein PROTODERMAL FACTOR 2 isoform X1 [Camelina sativa]>gi|727566833|ref|XP_010455800.1| PREDICTED: homeobox-leucine zipper protein PROTODERMAL FACTOR 2 isoform X2 [Camelina sativa]>gi|727566835|ref|XP_010455802.1| PREDICTED: homeobox-l…	186511535	NM_116727.3	2198	0	Arabidopsis thaliana homeobox-leucine zipper protein PROTODERMAL FACTOR 2 mRNA, complete cds	K09338	HD-ZIP	homeobox-leucine zipper protein	http://www.genome.jp/dbget-bin/www_bget?ko:K09338	Q93V99	3720	0	Homeobox-leucine zipper protein PROTODERMAL FACTOR 2 OS=Arabidopsis thaliana GN=PDF2 PE=2 SV=1	PF01852//PF05920//PF00046//PF02183	START domain//Homeobox KN domain//Homeobox domain//Homeobox associated leucine zipper	GO:0006355	regulation of transcription, DNA-templated	GO:0043565//GO:0003677//GO:0008289//GO:0003700	sequence-specific DNA binding//DNA binding//lipid binding//transcription factor activity, sequence-specific DNA binding	GO:0005667	transcription factor complex	--	--	FALSE	-1.4371	1	DOWN	-3.868	0.0068094	DOWN	-3.8496	0.0017403	FALSE	2.5581	0.077326
	2-3k.c20080/2/928	54.05	187.797	217.83	234.06	169.667	100.843	108.443	929	727475065	XP_010413333.1	1075	3.9e-115	PREDICTED: homeobox-leucine zipper protein ATHB-12 [Camelina sativa]	297821071	XM_002878373.1	692	0	Arabidopsis lyrata subsp. lyrata ATHB-12, mRNA	K09338	HD-ZIP	homeobox-leucine zipper protein	http://www.genome.jp/dbget-bin/www_bget?ko:K09338	Q9M276	1054	1.5e-113	Homeobox-leucine zipper protein ATHB-12 OS=Arabidopsis thaliana GN=ATHB-12 PE=2 SV=1	PF08912//PF02183//PF00046//PF01527//PF10473//PF05920	Rho Binding//Homeobox associated leucine zipper//Homeobox domain//Transposase//Leucine-rich repeats of kinetochore protein Cenp-F/LEK1//Homeobox KN domain	GO:0006313//GO:0006355	transposition, DNA-mediated//regulation of transcription, DNA-templated	GO:0017048//GO:0003677//GO:0042803//GO:0045502//GO:0008134//GO:0003700//GO:0043565//GO:0004803	Rho GTPase binding//DNA binding//protein homodimerization activity//dynein binding//transcription factor binding//transcription factor activity, sequence-specific DNA binding//sequence-specific DNA binding//transposase activity	GO:0030286//GO:0005667	dynein complex//transcription factor complex	--	--	FALSE	-1.0668	1	FALSE	0.95347	0.57617	UP	2.168	0.00089061	FALSE	-0.3508	1
	2-3k.c24507/1/2761	0.416667	12.8167	27.4867	57.7333	0.143333	56.09	45.3433	2887	565471976	XP_006293790.1	1795	4e-198	hypothetical protein CARUB_v10022772mg [Capsella rubella]>gi|482562498|gb|EOA26688.1| hypothetical protein CARUB_v10022772mg [Capsella rubella]	297827074	XM_002881374.1	1276	0	Arabidopsis lyrata subsp. lyrata hypothetical protein, mRNA	--	--	--	--	Q9SJ56	1786	6.2e-198	BEL1-like homeodomain protein 1 OS=Arabidopsis thaliana GN=BLH1 PE=1 SV=1	PF00046//PF01736//PF04625//PF05920//PF03153	Homeobox domain//Polyomavirus agnoprotein//DEC-1 protein, N-terminal region//Homeobox KN domain//Transcription factor IIA, alpha/beta subunit	GO:0006355//GO:0007304//GO:0006367	regulation of transcription, DNA-templated//chorion-containing eggshell formation//transcription initiation from RNA polymerase II promoter	GO:0005213//GO:0003677	structural constituent of chorion//DNA binding	GO:0005576//GO:0042600//GO:0005672	extracellular region//chorion//transcription factor TFIIA complex	--	--	FALSE	0.70485	1	UP	6.7992	0.019934	UP	7.105	0.0092461	FALSE	-7.6465	0.8832
	2-3k.c2522/2/3237	12.6967	7.74667	5.29667	3.94333	7.57667	7.41667	3.03667	3235	727487197	XP_010419627.1	3624	0	PREDICTED: homeobox-leucine zipper protein ANTHOCYANINLESS 2-like [Camelina sativa]>gi|727487199|ref|XP_010419628.1| PREDICTED: homeobox-leucine zipper protein ANTHOCYANINLESS 2-like [Camelina sativa]	727567698	XM_010457948.1	2108	0	PREDICTED: Camelina sativa homeobox-leucine zipper protein ANTHOCYANINLESS 2-like (LOC104737707), mRNA	K09338	HD-ZIP	homeobox-leucine zipper protein	http://www.genome.jp/dbget-bin/www_bget?ko:K09338	Q0WV12	3573	0	Homeobox-leucine zipper protein ANTHOCYANINLESS 2 OS=Arabidopsis thaliana GN=ANL2 PE=2 SV=1	PF00046//PF05920//PF00060//PF01852//PF15898	Homeobox domain//Homeobox KN domain//Ligand-gated ion channel//START domain//cGMP-dependent protein kinase interacting domain	GO:0006355//GO:0007268//GO:0007165//GO:0006811	regulation of transcription, DNA-templated//synaptic transmission//signal transduction//ion transport	GO:0004970//GO:0008289//GO:0019901//GO:0003677	ionotropic glutamate receptor activity//lipid binding//protein kinase binding//DNA binding	GO:0016020	membrane	--	--	FALSE	-0.87073	1	DOWN	-2.1198	0.049991	FALSE	-1.5772	0.07616	FALSE	0.58321	1
	2-3k.c25513/1/2503	20.5767	14	22.7133	12.1667	23.7467	3.14	5.23	2508	565471976	XP_006293790.1	2644	1.2e-296	hypothetical protein CARUB_v10022772mg [Capsella rubella]>gi|482562498|gb|EOA26688.1| hypothetical protein CARUB_v10022772mg [Capsella rubella]	727447068	XM_010506819.1	1934	0	PREDICTED: Camelina sativa BEL1-like homeodomain protein 1 (LOC104782008), mRNA	--	--	--	--	Q9SJ56	2597	4.9e-292	BEL1-like homeodomain protein 1 OS=Arabidopsis thaliana GN=BLH1 PE=1 SV=1	PF08414//PF04625//PF00038//PF01736//PF00046//PF05920	Respiratory burst NADPH oxidase//DEC-1 protein, N-terminal region//Intermediate filament protein//Polyomavirus agnoprotein//Homeobox domain//Homeobox KN domain	GO:0055114//GO:0007304//GO:0006355//GO:0006979//GO:0006804	oxidation-reduction process//chorion-containing eggshell formation//regulation of transcription, DNA-templated//response to oxidative stress//obsolete peroxidase reaction	GO:0004601//GO:0005198//GO:0005213//GO:0050664//GO:0003677	peroxidase activity//structural molecule activity//structural constituent of chorion//oxidoreductase activity, acting on NAD(P)H, oxygen as acceptor//DNA binding	GO:0005576//GO:0042600//GO:0005882	extracellular region//chorion//intermediate filament	--	--	FALSE	-2.2427	1	DOWN	-2.1361	0.031918	FALSE	-0.62763	1	FALSE	0.13419	1
	2-3k.c25650/1/2638	0.0633333	0.323333	1.2	0.376667	0.373333	0.976667	1.94	2612	565471976	XP_006293790.1	2685	2.3e-301	hypothetical protein CARUB_v10022772mg [Capsella rubella]>gi|482562498|gb|EOA26688.1| hypothetical protein CARUB_v10022772mg [Capsella rubella]	727447068	XM_010506819.1	1854	0	PREDICTED: Camelina sativa BEL1-like homeodomain protein 1 (LOC104782008), mRNA	--	--	--	--	Q9SJ56	2616	3.2e-294	BEL1-like homeodomain protein 1 OS=Arabidopsis thaliana GN=BLH1 PE=1 SV=1	PF05920//PF01736//PF00046//PF08414	Homeobox KN domain//Polyomavirus agnoprotein//Homeobox domain//Respiratory burst NADPH oxidase	GO:0055114//GO:0006355//GO:0006979//GO:0006804	oxidation-reduction process//regulation of transcription, DNA-templated//response to oxidative stress//obsolete peroxidase reaction	GO:0050664//GO:0004601//GO:0003677	oxidoreductase activity, acting on NAD(P)H, oxygen as acceptor//peroxidase activity//DNA binding	--	--	--	--	FALSE	0.67063	1	UP	4.8581	0.038151	FALSE	2.4989	0.96187	FALSE	-1.7009	1
	2-3k.c28493/5/3198	9.53333	7.25	5.89333	7.67	2.89333	5.56667	3.43333	3200	727487197	XP_010419627.1	3720	0	PREDICTED: homeobox-leucine zipper protein ANTHOCYANINLESS 2-like [Camelina sativa]>gi|727487199|ref|XP_010419628.1| PREDICTED: homeobox-leucine zipper protein ANTHOCYANINLESS 2-like [Camelina sativa]	727487196	XM_010421325.1	2139	0	PREDICTED: Camelina sativa homeobox-leucine zipper protein ANTHOCYANINLESS 2-like (LOC104705337), transcript variant X1, mRNA	K09338	HD-ZIP	homeobox-leucine zipper protein	http://www.genome.jp/dbget-bin/www_bget?ko:K09338	Q0WV12	3686	0	Homeobox-leucine zipper protein ANTHOCYANINLESS 2 OS=Arabidopsis thaliana GN=ANL2 PE=2 SV=1	PF00046//PF05920//PF00060//PF01852	Homeobox domain//Homeobox KN domain//Ligand-gated ion channel//START domain	GO:0006355//GO:0007268//GO:0006811//GO:0007165	regulation of transcription, DNA-templated//synaptic transmission//ion transport//signal transduction	GO:0008289//GO:0004970//GO:0003677	lipid binding//ionotropic glutamate receptor activity//DNA binding	GO:0016020	membrane	--	--	FALSE	-0.84931	1	FALSE	-1.5114	0.27547	FALSE	-0.21519	1	FALSE	-0.97297	0.91086
	2-3k.c29013/2/3073	5.21333	6.05333	1.04333	2.4	0.00333333	1.70667	1.81667	3077	727487197	XP_010419627.1	3624	0	PREDICTED: homeobox-leucine zipper protein ANTHOCYANINLESS 2-like [Camelina sativa]>gi|727487199|ref|XP_010419628.1| PREDICTED: homeobox-leucine zipper protein ANTHOCYANINLESS 2-like [Camelina sativa]	727567698	XM_010457948.1	2044	0	PREDICTED: Camelina sativa homeobox-leucine zipper protein ANTHOCYANINLESS 2-like (LOC104737707), mRNA	K09338	HD-ZIP	homeobox-leucine zipper protein	http://www.genome.jp/dbget-bin/www_bget?ko:K09338	Q0WV12	3573	0	Homeobox-leucine zipper protein ANTHOCYANINLESS 2 OS=Arabidopsis thaliana GN=ANL2 PE=2 SV=1	PF00046//PF00060//PF05920//PF15898//PF01852	Homeobox domain//Ligand-gated ion channel//Homeobox KN domain//cGMP-dependent protein kinase interacting domain//START domain	GO:0007165//GO:0006811//GO:0006355//GO:0007268	signal transduction//ion transport//regulation of transcription, DNA-templated//synaptic transmission	GO:0019901//GO:0003677//GO:0004970//GO:0008289	protein kinase binding//DNA binding//ionotropic glutamate receptor activity//lipid binding	GO:0016020	membrane	--	--	FALSE	0.69832	1	FALSE	-1.6548	0.36011	FALSE	-1.0602	0.61831	DOWN	#NAME?	0.048627
	2-3k.c3961/15/3042	16.7267	12.8633	7.54	9.42667	6.87333	8.02667	4.93667	3019	727566829	XP_010455798.1	3711	0	PREDICTED: homeobox-leucine zipper protein PROTODERMAL FACTOR 2 isoform X1 [Camelina sativa]>gi|727566831|ref|XP_010455799.1| PREDICTED: homeobox-leucine zipper protein PROTODERMAL FACTOR 2 isoform X1 [Camelina sativa]>gi|727566833|ref|XP_010455800.1| PREDICTED: homeobox-leucine zipper protein PROTODERMAL FACTOR 2 isoform X2 [Camelina sativa]>gi|727566835|ref|XP_010455802.1| PREDICTED: homeobox-l…	186511535	NM_116727.3	2270	0	Arabidopsis thaliana homeobox-leucine zipper protein PROTODERMAL FACTOR 2 mRNA, complete cds	K09338	HD-ZIP	homeobox-leucine zipper protein	http://www.genome.jp/dbget-bin/www_bget?ko:K09338	Q93V99	3711	0	Homeobox-leucine zipper protein PROTODERMAL FACTOR 2 OS=Arabidopsis thaliana GN=PDF2 PE=2 SV=1	PF01852//PF05920//PF02183//PF00046	START domain//Homeobox KN domain//Homeobox associated leucine zipper//Homeobox domain	GO:0006355	regulation of transcription, DNA-templated	GO:0043565//GO:0003677//GO:0003700//GO:0008289	sequence-specific DNA binding//DNA binding//transcription factor activity, sequence-specific DNA binding//lipid binding	GO:0005667	transcription factor complex	--	--	FALSE	-0.72371	1	FALSE	-1.8484	0.11458	FALSE	-0.74951	0.68388	FALSE	-0.10946	1
	2-3k.c9739/1/2691	42.29	30.6833	58.15	31.93	80.1533	26.3767	16.9033	2693	565471976	XP_006293790.1	2644	1.3e-296	hypothetical protein CARUB_v10022772mg [Capsella rubella]>gi|482562498|gb|EOA26688.1| hypothetical protein CARUB_v10022772mg [Capsella rubella]	727447068	XM_010506819.1	2035	0	PREDICTED: Camelina sativa BEL1-like homeodomain protein 1 (LOC104782008), mRNA	--	--	--	--	Q9SJ56	2597	5.2e-292	BEL1-like homeodomain protein 1 OS=Arabidopsis thaliana GN=BLH1 PE=1 SV=1	PF05920//PF00046//PF01736//PF00038//PF04625//PF08414	Homeobox KN domain//Homeobox domain//Polyomavirus agnoprotein//Intermediate filament protein//DEC-1 protein, N-terminal region//Respiratory burst NADPH oxidase	GO:0007304//GO:0006355//GO:0055114//GO:0006804//GO:0006979	chorion-containing eggshell formation//regulation of transcription, DNA-templated//oxidation-reduction process//obsolete peroxidase reaction//response to oxidative stress	GO:0004601//GO:0003677//GO:0050664//GO:0005213//GO:0005198	peroxidase activity//DNA binding//oxidoreductase activity, acting on NAD(P)H, oxygen as acceptor//structural constituent of chorion//structural molecule activity	GO:0042600//GO:0005576//GO:0005882	chorion//extracellular region//intermediate filament	--	--	FALSE	-1.8584	1	FALSE	-1.4204	0.18413	FALSE	-0.26958	1	FALSE	0.54059	1
	3-6k.c17475/2/4688	0.6	0.03	0	0.58	0.356667	0.0766667	0	4685	297845788	XP_002890775.1	5120	0	HB-1 [Arabidopsis lyrata subsp. lyrata]>gi|297336617|gb|EFH67034.1| HB-1 [Arabidopsis lyrata subsp. lyrata]	727575971	XM_010462338.1	3405	0	PREDICTED: Camelina sativa uncharacterized LOC104741454 (LOC104741454), transcript variant X2, mRNA	--	--	--	--	--	--	--	--	PF00046//PF10716//PF02601//PF05920//PF05066	Homeobox domain//NADH dehydrogenase transmembrane subunit//Exonuclease VII, large subunit//Homeobox KN domain//HB1, ASXL, restriction endonuclease HTH domain	GO:0006118//GO:0006308//GO:0055114//GO:0006351//GO:0006355	obsolete electron transport//DNA catabolic process//oxidation-reduction process//transcription, DNA-templated//regulation of transcription, DNA-templated	GO:0003677//GO:0016655//GO:0008855//GO:0043565//GO:0003700	DNA binding//oxidoreductase activity, acting on NAD(P)H, quinone or similar compound as acceptor//exodeoxyribonuclease VII activity//sequence-specific DNA binding//transcription factor activity, sequence-specific DNA binding	GO:0005667//GO:0005634//GO:0009318	transcription factor complex//nucleus//exodeoxyribonuclease VII complex	--	--	FALSE	NA	NA	DOWN	#NAME?	0.035646	FALSE	-0.063852	1	FALSE	Inf	0.92152
	3-6k.c4624/1/4755	0	1.14	2.07333	0	0.0666667	4.18333	4.42	4753	297845788	XP_002890775.1	5120	0	HB-1 [Arabidopsis lyrata subsp. lyrata]>gi|297336617|gb|EFH67034.1| HB-1 [Arabidopsis lyrata subsp. lyrata]	297845787	XM_002890729.1	2947	0	Arabidopsis lyrata subsp. lyrata HB-1, mRNA	--	--	--	--	--	--	--	--	PF05920//PF05066//PF02601//PF10716//PF00046	Homeobox KN domain//HB1, ASXL, restriction endonuclease HTH domain//Exonuclease VII, large subunit//NADH dehydrogenase transmembrane subunit//Homeobox domain	GO:0055114//GO:0006351//GO:0006355//GO:0006118//GO:0006308	oxidation-reduction process//transcription, DNA-templated//regulation of transcription, DNA-templated//obsolete electron transport//DNA catabolic process	GO:0043565//GO:0003700//GO:0003677//GO:0008855//GO:0016655	sequence-specific DNA binding//transcription factor activity, sequence-specific DNA binding//DNA binding//exodeoxyribonuclease VII activity//oxidoreductase activity, acting on NAD(P)H, quinone or similar compound as acceptor	GO:0009318//GO:0005667//GO:0005634	exodeoxyribonuclease VII complex//transcription factor complex//nucleus	--	--	FALSE	1.0709	1	UP	Inf	0.00089018	FALSE	NA	NA	FALSE	-4.9424	1
	3-6k.c5545/1/4897	0.313333	0.3	1.92	2.5	2.52	2.63667	3.6	4820	297845788	XP_002890775.1	4960	0	HB-1 [Arabidopsis lyrata subsp. lyrata]>gi|297336617|gb|EFH67034.1| HB-1 [Arabidopsis lyrata subsp. lyrata]	727575971	XM_010462338.1	3462	0	PREDICTED: Camelina sativa uncharacterized LOC104741454 (LOC104741454), transcript variant X2, mRNA	--	--	--	--	Q9SGH2	141	5.8e-07	Methyl-CpG-binding domain-containing protein 9 OS=Arabidopsis thaliana GN=MBD9 PE=2 SV=1	PF05066//PF05920//PF02601//PF00046	HB1, ASXL, restriction endonuclease HTH domain//Homeobox KN domain//Exonuclease VII, large subunit//Homeobox domain	GO:0006308//GO:0006351//GO:0006355	DNA catabolic process//transcription, DNA-templated//regulation of transcription, DNA-templated	GO:0003677//GO:0008855//GO:0003700//GO:0043565	DNA binding//exodeoxyribonuclease VII activity//transcription factor activity, sequence-specific DNA binding//sequence-specific DNA binding	GO:0005667//GO:0005634//GO:0009318	transcription factor complex//nucleus//exodeoxyribonuclease VII complex	--	--	FALSE	0.86834	1	UP	3.5164	0.0055826	UP	3.0755	0.015652	FALSE	0.40765	1
bHLH	1-2k.c16006/1/2115.1	0	3.35333	0.33	3.37333	0.236667	0	1.17667	1244	565458900	XP_006287449.1	1385	6e-151	hypothetical protein CARUB_v10000655mg [Capsella rubella]>gi|482556155|gb|EOA20347.1| hypothetical protein CARUB_v10000655mg [Capsella rubella]	297810916	XM_002873296.1	803	0	Arabidopsis lyrata subsp. lyrata hypothetical protein, mRNA	--	--	--	--	Q9LEZ3	1319	3.8e-144	Transcription factor BIM1 OS=Arabidopsis thaliana GN=BIM1 PE=1 SV=2	PF00010	Helix-loop-helix DNA-binding domain	--	--	GO:0046983	protein dimerization activity	--	--	--	--	FALSE	1.8858	1	FALSE	Inf	0.399	UP	Inf	0.026614	FALSE	-0.38732	1
	1-2k.c16057/2/1694	30.3133	26.0433	70.2467	71.85	63.6	40.8733	34.1933	1672	567132854	XP_006393076.1	1521	1.4e-166	hypothetical protein EUTSA_v10011463mg [Eutrema salsugineum]>gi|557089654|gb|ESQ30362.1| hypothetical protein EUTSA_v10011463mg [Eutrema salsugineum]	727613560	XM_010481272.1	1034	0	PREDICTED: Camelina sativa transcription factor bHLH122-like (LOC104758410), mRNA	--	--	--	--	Q9C690	1494	2.6e-164	Transcription factor bHLH122 OS=Arabidopsis thaliana GN=BHLH122 PE=1 SV=1	PF00010	Helix-loop-helix DNA-binding domain	--	--	GO:0046983	protein dimerization activity	--	--	--	--	FALSE	-1.0672	1	FALSE	0.1856	1	FALSE	1.3558	0.10016	FALSE	-0.090695	1
	1-2k.c16189/1/1712	36.5667	17.7433	7.31	1.65	0.873333	4.20333	3.95333	1732	30694919	NP_851021.1	1711	1.3e-188	transcription factor PIF5 [Arabidopsis thaliana]>gi|7529749|emb|CAB86934.1| putative protein [Arabidopsis thaliana]>gi|332646347|gb|AEE79868.1| transcription factor PIF5 [Arabidopsis thaliana]	145361983	NM_180690.2	1088	0	Arabidopsis thaliana transcription factor PIF5 mRNA, complete cds	K16189	PIF4	phytochrome-interacting factor 4	http://www.genome.jp/dbget-bin/www_bget?ko:K16189	Q84LH8	1703	1.6e-188	Transcription factor PIF5 OS=Arabidopsis thaliana GN=PIF5 PE=1 SV=1	PF00010//PF04281	Helix-loop-helix DNA-binding domain//Mitochondrial import receptor subunit Tom22	GO:0019761//GO:0019344//GO:0006546//GO:0030003//GO:0019288//GO:0009585//GO:0006733//GO:0009695//GO:0009630//GO:0006766//GO:0010600//GO:0009965//GO:0007623//GO:0045893//GO:0009106//GO:0015995//GO:0010928//GO:0009693//GO:0009117//GO:0009684//GO:0006636//GO:0006886//GO:0009073//GO:0009108//GO:0030154	glucosinolate biosynthetic process//cysteine biosynthetic process//glycine catabolic process//cellular cation homeostasis//isopentenyl diphosphate biosynthetic process, methylerythritol 4-phosphate pathway//red, far-red light phototransduction//oxidoreduction coenzyme metabolic process//jasmonic acid biosynthetic process//gravitropism//vitamin metabolic process//regulation of auxin biosynthetic p…	GO:0003700//GO:0046983//GO:0003677	transcription factor activity, sequence-specific DNA binding//protein dimerization activity//DNA binding	GO:0005634//GO:0005667//GO:0005741	nucleus//transcription factor complex//mitochondrial outer membrane	--	--	FALSE	-0.93832	1	DOWN	-3.2863	0.001	DOWN	-4.4304	4.1842e-09	FALSE	-3.0114	0.051262
	1-2k.c1624/11/2205	98.3667	91.9133	41.05	25.2467	29.3967	19.9167	18.8367	2193	727611089	XP_010478689.1	2816	0	PREDICTED: LOW QUALITY PROTEIN: transcription factor MYC2-like [Camelina sativa]	332189094	CP002684.1	1612	0	Arabidopsis thaliana chromosome 1 sequence	K13422	MYC2	transcription factor MYC2	http://www.genome.jp/dbget-bin/www_bget?ko:K13422	Q39204	2771	2.8e-312	Transcription factor MYC2 OS=Arabidopsis thaliana GN=MYC2 PE=1 SV=2	PF03769//PF00010	Attacin, C-terminal region//Helix-loop-helix DNA-binding domain	--	--	GO:0046983	protein dimerization activity	GO:0005576	extracellular region	--	--	FALSE	-1.1504	1	DOWN	-2.4315	0.0059092	DOWN	-1.876	0.0050966	FALSE	-0.42682	1
	1-2k.c21697/1/1545	18.5833	17.3733	6.82667	3.13	2.93667	4.76667	3.51667	1474	727540604	XP_010443943.1	911	6.5e-96	PREDICTED: transcription factor PIF7-like [Camelina sativa]	145323677	NM_001037040.2	923	0	Arabidopsis thaliana transcription factor PIF7 mRNA, complete cds	--	--	--	--	Q570R7	908	2e-96	Transcription factor PIF7 OS=Arabidopsis thaliana GN=BHLH72 PE=1 SV=2	PF00010//PF03612//PF01496//PF05456	Helix-loop-helix DNA-binding domain//Sorbitol phosphotransferase enzyme II N-terminus//V-type ATPase 116kDa subunit family//Eukaryotic translation initiation factor 4E binding protein (EIF4EBP)	GO:0045947//GO:0008643//GO:0015991//GO:0015992//GO:0009401	negative regulation of translational initiation//carbohydrate transport//ATP hydrolysis coupled proton transport//proton transport//phosphoenolpyruvate-dependent sugar phosphotransferase system	GO:0008982//GO:0015078//GO:0008190//GO:0046983	protein-N(PI)-phosphohistidine-sugar phosphotransferase activity//hydrogen ion transmembrane transporter activity//eukaryotic initiation factor 4E binding//protein dimerization activity	GO:0016021//GO:0033179//GO:0009357	integral component of membrane//proton-transporting V-type ATPase, V0 domain//protein-N(PI)-phosphohistidine-sugar phosphotransferase complex	--	--	FALSE	-1.0501	1	DOWN	-2.5161	0.043914	DOWN	-2.5193	0.0091042	FALSE	-1.1863	0.99858
	1-2k.c24266/1/1550	0.76	18.2367	5.96333	3.07333	0	0	0.923333	1552	567132854	XP_006393076.1	1521	1.3e-166	hypothetical protein EUTSA_v10011463mg [Eutrema salsugineum]>gi|557089654|gb|ESQ30362.1| hypothetical protein EUTSA_v10011463mg [Eutrema salsugineum]	727613560	XM_010481272.1	998	0	PREDICTED: Camelina sativa transcription factor bHLH122-like (LOC104758410), mRNA	--	--	--	--	Q9C690	1494	2.4e-164	Transcription factor bHLH122 OS=Arabidopsis thaliana GN=BHLH122 PE=1 SV=1	PF00010	Helix-loop-helix DNA-binding domain	--	--	GO:0046983	protein dimerization activity	--	--	--	--	FALSE	-2.6304	1	FALSE	0.36742	1	FALSE	1.9667	0.69138	FALSE	#NAME?	0.71537
	1-2k.c24743/1/1435	5.92	26.2167	7.78333	31.1433	55.99	77.7167	156.893	1353	565434141	XP_006280862.1	1031	7.2e-110	hypothetical protein CARUB_v10026852mg [Capsella rubella]>gi|482549566|gb|EOA13760.1| hypothetical protein CARUB_v10026852mg [Capsella rubella]	727422680	XM_010444265.1	637	0	PREDICTED: Camelina sativa transcription factor bHLH137-like (LOC104725585), mRNA	--	--	--	--	Q93W88	927	1.2e-98	Transcription factor bHLH137 OS=Arabidopsis thaliana GN=BHLH137 PE=2 SV=1	PF00010	Helix-loop-helix DNA-binding domain	--	--	GO:0046983	protein dimerization activity	--	--	--	--	UP	4.24	0.00017481	UP	4.6743	5.2625e-08	FALSE	2.4365	0.063754	FALSE	2.8281	0.50669
	1-2k.c24920/1/1725.1	4.27333	11.64	16.0133	0	10.35	4.34	4.88333	1451	297852830	XP_002894296.1	1456	4.1e-159	basic helix-loop-helix family protein [Arabidopsis lyrata subsp. lyrata]>gi|297340138|gb|EFH70555.1| basic helix-loop-helix family protein [Arabidopsis lyrata subsp. lyrata]	42470431	BX815133.1	910	0	Arabidopsis thaliana Full-length cDNA Complete sequence from clone GSLTLS37ZA09 of Adult vegetative tissue of strain col-0 of Arabidopsis thaliana (thale cress)	--	--	--	--	Q9C690	1162	7e-126	Transcription factor bHLH122 OS=Arabidopsis thaliana GN=BHLH122 PE=1 SV=1	PF00010	Helix-loop-helix DNA-binding domain	--	--	GO:0046983	protein dimerization activity	--	--	--	--	FALSE	-1.8183	1	FALSE	-0.053012	1	FALSE	#NAME?	0.4396	FALSE	-0.53959	1
	1-2k.c25482/1/1879	5.44	3.51	1.29333	0.596667	0.0633333	1.05667	0.43	1889	20197630	AAD22130.2	992	3.4e-105	expressed protein [Arabidopsis thaliana]>gi|23297067|gb|AAN13083.1| unknown protein [Arabidopsis thaliana]	13430617	AF360221.1	883	0	Arabidopsis thaliana unknown protein (At2g43010) mRNA, complete cds	K16189	PIF4	phytochrome-interacting factor 4	http://www.genome.jp/dbget-bin/www_bget?ko:K16189	Q8W2F3	969	2.2e-103	Transcription factor PIF4 OS=Arabidopsis thaliana GN=PIF4 PE=1 SV=1	PF13397//PF00010	RNA polymerase-binding protein//Helix-loop-helix DNA-binding domain	GO:0045893	positive regulation of transcription, DNA-templated	GO:0046983//GO:0001000	protein dimerization activity//bacterial-type RNA polymerase core enzyme binding	--	--	--	--	FALSE	-1.6519	1	DOWN	-3.7097	0.033206	DOWN	-3.1391	0.02847	FALSE	-4.4161	0.65025
	1-2k.c26120/1/1524	13.92	7.46667	2.60333	0.736667	0.0433333	2.27333	0.823333	1608	291506702	ADE08783.1	1549	7.4e-170	phytochrome interacting factor 4 [Arabidopsis thaliana]>gi|291506704|gb|ADE08784.1| phytochrome interacting factor 4 [Arabidopsis thaliana]>gi|291506706|gb|ADE08785.1| phytochrome interacting factor 4 [Arabidopsis thaliana]>gi|291506708|gb|ADE08786.1| phytochrome interacting factor 4 [Arabidopsis thaliana]>gi|291506710|gb|ADE08787.1| phytochrome interacting factor 4 [Arabidopsis thaliana]>gi|2915…	30689217	NM_129862.2	948	0	Arabidopsis thaliana transcription factor PIF4 mRNA, complete cds	K16189	PIF4	phytochrome-interacting factor 4	http://www.genome.jp/dbget-bin/www_bget?ko:K16189	Q8W2F3	1542	6.7e-170	Transcription factor PIF4 OS=Arabidopsis thaliana GN=PIF4 PE=1 SV=1	PF00010	Helix-loop-helix DNA-binding domain	--	--	GO:0046983	protein dimerization activity	--	--	--	--	FALSE	-1.7308	1	DOWN	-4.1999	0.00092717	DOWN	-4.1803	5.3188e-05	FALSE	-5.7234	0.13105
	1-2k.c26312/1/1850	3.33667	4.03667	0.813333	0.206667	0.0866667	0.623333	0.44	1851	30694924	NP_191465.3	1083	9.3e-116	transcription factor PIF5 [Arabidopsis thaliana]>gi|79315658|ref|NP_001030889.1| transcription factor PIF5 [Arabidopsis thaliana]>gi|79315685|ref|NP_001030890.1| transcription factor PIF5 [Arabidopsis thaliana]>gi|75297820|sp|Q84LH8.1|PIF5_ARATH RecName: Full=Transcription factor PIF5; AltName: Full=Basic helix-loop-helix protein 65; Short=AtbHLH65; Short=bHLH 65; AltName: Full=Phytochrome intera…	79315657	NM_001035812.1	691	0	Arabidopsis thaliana transcription factor PIF5 mRNA, complete cds	--	--	--	--	Q84LH8	1083	1.3e-116	Transcription factor PIF5 OS=Arabidopsis thaliana GN=PIF5 PE=1 SV=1	PF00010	Helix-loop-helix DNA-binding domain	GO:0009106//GO:0015995//GO:0045893//GO:0007623//GO:0009108//GO:0030154//GO:0009073//GO:0009684//GO:0006636//GO:0009117//GO:0010928//GO:0009693//GO:0019288//GO:0030003//GO:0006546//GO:0019344//GO:0019761//GO:0010600//GO:0009965//GO:0006766//GO:0009695//GO:0006733//GO:0009630//GO:0009585	lipoate metabolic process//chlorophyll biosynthetic process//positive regulation of transcription, DNA-templated//circadian rhythm//coenzyme biosynthetic process//cell differentiation//aromatic amino acid family biosynthetic process//indoleacetic acid biosynthetic process//unsaturated fatty acid biosynthetic process//nucleotide metabolic process//regulation of auxin mediated signaling pathway//et…	GO:0003677//GO:0003700//GO:0046983	DNA binding//transcription factor activity, sequence-specific DNA binding//protein dimerization activity	GO:0005667//GO:0005634	transcription factor complex//nucleus	--	--	FALSE	-0.86733	1	FALSE	-2.8943	0.25402	DOWN	-4.0214	0.035037	FALSE	-3.1734	1
	1-2k.c31256/1/1420	19.77	8.96333	23.6667	32.29	49.5633	22.1233	29.11	1420	727419402	XP_010426522.1	1202	1.1e-129	PREDICTED: transcription factor UNE10-like [Camelina sativa]	727567841	XM_010458025.1	989	0	PREDICTED: Camelina sativa transcription factor UNE10 (LOC104737773), mRNA	--	--	--	--	Q8GZ38	1158	2e-125	Transcription factor UNE10 OS=Arabidopsis thaliana GN=UNE10 PE=2 SV=1	PF00010	Helix-loop-helix DNA-binding domain	--	--	GO:0046983	protein dimerization activity	--	--	--	--	FALSE	0.2238	1	FALSE	0.48636	0.94082	FALSE	0.72811	0.67502	FALSE	1.0562	0.51961
	1-2k.c31410/1/1797	90.9433	54.2933	26.77	14.4933	7.61	38.6133	33.7033	1791	30694919	NP_851021.1	1723	5.5e-190	transcription factor PIF5 [Arabidopsis thaliana]>gi|7529749|emb|CAB86934.1| putative protein [Arabidopsis thaliana]>gi|332646347|gb|AEE79868.1| transcription factor PIF5 [Arabidopsis thaliana]	145361983	NM_180690.2	1128	0	Arabidopsis thaliana transcription factor PIF5 mRNA, complete cds	K16189	PIF4	phytochrome-interacting factor 4	http://www.genome.jp/dbget-bin/www_bget?ko:K16189	Q84LH8	1715	6.5e-190	Transcription factor PIF5 OS=Arabidopsis thaliana GN=PIF5 PE=1 SV=1	PF00010	Helix-loop-helix DNA-binding domain	GO:0009693//GO:0010928//GO:0009117//GO:0009684//GO:0006636//GO:0009073//GO:0030154//GO:0009108//GO:0007623//GO:0045893//GO:0015995//GO:0009106//GO:0009585//GO:0006733//GO:0009630//GO:0009695//GO:0006766//GO:0010600//GO:0009965//GO:0019761//GO:0019344//GO:0006546//GO:0030003//GO:0019288	ethylene biosynthetic process//regulation of auxin mediated signaling pathway//nucleotide metabolic process//indoleacetic acid biosynthetic process//unsaturated fatty acid biosynthetic process//aromatic amino acid family biosynthetic process//cell differentiation//coenzyme biosynthetic process//circadian rhythm//positive regulation of transcription, DNA-templated//chlorophyll biosynthetic process…	GO:0003677//GO:0046983//GO:0003700	DNA binding//protein dimerization activity//transcription factor activity, sequence-specific DNA binding	GO:0005634//GO:0005667	nucleus//transcription factor complex	--	--	FALSE	0.31744	1	FALSE	-1.4487	0.22195	DOWN	-2.5958	9.0625e-05	DOWN	-1.7818	0.032336
	1-2k.c31596/2/2029	8.87	7.54	4.06	3.51667	2.35667	1.86667	1.32	2009	565499632	XP_006307455.1	1542	6e-169	hypothetical protein CARUB_v10009081mg [Capsella rubella]>gi|482576166|gb|EOA40353.1| hypothetical protein CARUB_v10009081mg [Capsella rubella]	565499631	XM_006307393.1	1188	0	Capsella rubella hypothetical protein (CARUB_v10009081mg) mRNA, complete cds	--	--	--	--	Q9LPW3	1395	9.3e-153	Transcription factor SCREAM2 OS=Arabidopsis thaliana GN=SCRM2 PE=1 SV=1	PF00666//PF00010	Cathelicidin//Helix-loop-helix DNA-binding domain	GO:0006952	defense response	GO:0046983	protein dimerization activity	GO:0005576	extracellular region	--	--	FALSE	-1.7173	1	DOWN	-2.8712	0.034936	FALSE	-1.2736	0.44482	FALSE	-0.73514	1
	1-2k.c31784/1/1767	6.55333	4.30667	1.35667	0.696667	0.353333	0.486667	0.513333	1770	20197630	AAD22130.2	992	3.2e-105	expressed protein [Arabidopsis thaliana]>gi|23297067|gb|AAN13083.1| unknown protein [Arabidopsis thaliana]	13430617	AF360221.1	877	0	Arabidopsis thaliana unknown protein (At2g43010) mRNA, complete cds	K16189	PIF4	phytochrome-interacting factor 4	http://www.genome.jp/dbget-bin/www_bget?ko:K16189	Q8W2F3	969	2.1e-103	Transcription factor PIF4 OS=Arabidopsis thaliana GN=PIF4 PE=1 SV=1	PF00010//PF13397	Helix-loop-helix DNA-binding domain//RNA polymerase-binding protein	GO:0045893	positive regulation of transcription, DNA-templated	GO:0001000//GO:0046983	bacterial-type RNA polymerase core enzyme binding//protein dimerization activity	--	--	--	--	FALSE	-1.3424	1	DOWN	-3.6574	0.028288	DOWN	-3.1892	0.017996	FALSE	-1.8399	1
	1-2k.c32496/1/1322	3.11333	12.4967	6.81667	13.98	24.2833	36.8167	70.3767	1297	727422681	XP_010442567.1	1124	1.1e-120	PREDICTED: transcription factor bHLH137-like [Camelina sativa]	727422680	XM_010444265.1	700	0	PREDICTED: Camelina sativa transcription factor bHLH137-like (LOC104725585), mRNA	--	--	--	--	Q93W88	1040	8.8e-112	Transcription factor bHLH137 OS=Arabidopsis thaliana GN=BHLH137 PE=2 SV=1	PF00010	Helix-loop-helix DNA-binding domain	--	--	GO:0046983	protein dimerization activity	--	--	--	--	FALSE	3.3062	0.10029	UP	4.4997	0.0025278	FALSE	2.2177	0.24068	FALSE	1.8116	1
	1-2k.c36344/1/1655	11.3267	11.6233	3.94	1.54667	0.36	1.00667	0.723333	1649	291506702	ADE08783.1	1529	1.6e-167	phytochrome interacting factor 4 [Arabidopsis thaliana]>gi|291506704|gb|ADE08784.1| phytochrome interacting factor 4 [Arabidopsis thaliana]>gi|291506706|gb|ADE08785.1| phytochrome interacting factor 4 [Arabidopsis thaliana]>gi|291506708|gb|ADE08786.1| phytochrome interacting factor 4 [Arabidopsis thaliana]>gi|291506710|gb|ADE08787.1| phytochrome interacting factor 4 [Arabidopsis thaliana]>gi|2915…	30689217	NM_129862.2	953	0	Arabidopsis thaliana transcription factor PIF4 mRNA, complete cds	K16189	PIF4	phytochrome-interacting factor 4	http://www.genome.jp/dbget-bin/www_bget?ko:K16189	Q8W2F3	1522	1.4e-167	Transcription factor PIF4 OS=Arabidopsis thaliana GN=PIF4 PE=1 SV=1	PF13397//PF00010	RNA polymerase-binding protein//Helix-loop-helix DNA-binding domain	GO:0045893	positive regulation of transcription, DNA-templated	GO:0001000//GO:0046983	bacterial-type RNA polymerase core enzyme binding//protein dimerization activity	--	--	--	--	FALSE	-2.5886	1	DOWN	-4.1887	0.0012328	DOWN	-2.833	0.010032	FALSE	-3.3647	0.25818
	1-2k.c37030/1/1852	12.7267	7.93	5.21667	3.76667	2.73667	4.29333	3.98667	1863	727417960	XP_010416217.1	1162	6.4e-125	PREDICTED: transcription factor PIF1-like isoform X2 [Camelina sativa]	565479917	XM_006297537.1	692	0	Capsella rubella hypothetical protein (CARUB_v10013621mg) mRNA, complete cds	--	--	--	--	Q8GZM7	1009	5e-108	Transcription factor PIF1 OS=Arabidopsis thaliana GN=PIF1 PE=1 SV=1	PF00010	Helix-loop-helix DNA-binding domain	--	--	GO:0046983	protein dimerization activity	--	--	--	--	FALSE	-0.43802	1	FALSE	-1.7119	0.27822	FALSE	-1.6997	0.1327	FALSE	-0.90683	1
	1-2k.c38581/2/1813	61.62	30.0467	10.55	4.85667	1.81333	11.1567	6.00333	1767	30694919	NP_851021.1	1711	1.3e-188	transcription factor PIF5 [Arabidopsis thaliana]>gi|7529749|emb|CAB86934.1| putative protein [Arabidopsis thaliana]>gi|332646347|gb|AEE79868.1| transcription factor PIF5 [Arabidopsis thaliana]	79315684	NM_001035813.1	1086	0	Arabidopsis thaliana transcription factor PIF5 mRNA, complete cds	K16189	PIF4	phytochrome-interacting factor 4	http://www.genome.jp/dbget-bin/www_bget?ko:K16189	Q84LH8	1703	1.6e-188	Transcription factor PIF5 OS=Arabidopsis thaliana GN=PIF5 PE=1 SV=1	PF04281//PF00010	Mitochondrial import receptor subunit Tom22//Helix-loop-helix DNA-binding domain	GO:0006766//GO:0010600//GO:0009965//GO:0009585//GO:0006733//GO:0009630//GO:0009695//GO:0006546//GO:0019344//GO:0019288//GO:0030003//GO:0019761//GO:0006886//GO:0006636//GO:0009684//GO:0009108//GO:0030154//GO:0009073//GO:0009693//GO:0010928//GO:0009117//GO:0009106//GO:0015995//GO:0045893//GO:0007623	vitamin metabolic process//regulation of auxin biosynthetic process//leaf morphogenesis//red, far-red light phototransduction//oxidoreduction coenzyme metabolic process//gravitropism//jasmonic acid biosynthetic process//glycine catabolic process//cysteine biosynthetic process//isopentenyl diphosphate biosynthetic process, methylerythritol 4-phosphate pathway//cellular cation homeostasis//glucosin…	GO:0046983//GO:0003700//GO:0003677	protein dimerization activity//transcription factor activity, sequence-specific DNA binding//DNA binding	GO:0005634//GO:0005667//GO:0005741	nucleus//transcription factor complex//mitochondrial outer membrane	--	--	FALSE	-0.87486	1	DOWN	-3.4398	0.00021598	DOWN	-3.6039	1.2855e-07	DOWN	-2.4966	0.034686
	1-2k.c4090/1/1643	11.77	12.9267	4.48333	1.56333	0.173333	3.23667	1.78667	1636	291506702	ADE08783.1	1541	6.4e-169	phytochrome interacting factor 4 [Arabidopsis thaliana]>gi|291506704|gb|ADE08784.1| phytochrome interacting factor 4 [Arabidopsis thaliana]>gi|291506706|gb|ADE08785.1| phytochrome interacting factor 4 [Arabidopsis thaliana]>gi|291506708|gb|ADE08786.1| phytochrome interacting factor 4 [Arabidopsis thaliana]>gi|291506710|gb|ADE08787.1| phytochrome interacting factor 4 [Arabidopsis thaliana]>gi|2915…	30689217	NM_129862.2	967	0	Arabidopsis thaliana transcription factor PIF4 mRNA, complete cds	K16189	PIF4	phytochrome-interacting factor 4	http://www.genome.jp/dbget-bin/www_bget?ko:K16189	Q8W2F3	1534	5.8e-169	Transcription factor PIF4 OS=Arabidopsis thaliana GN=PIF4 PE=1 SV=1	PF00010//PF13397	Helix-loop-helix DNA-binding domain//RNA polymerase-binding protein	GO:0045893	positive regulation of transcription, DNA-templated	GO:0046983//GO:0001000	protein dimerization activity//bacterial-type RNA polymerase core enzyme binding	--	--	--	--	FALSE	-1.4192	1	DOWN	-2.7969	0.049983	DOWN	-2.8709	0.0076893	DOWN	-4.6819	0.047673
	1-2k.c5896/2/2056	0.0166667	35.7967	15.21	19.64	0.0966667	16.7833	12.3833	2055	727611089	XP_010478689.1	2695	1.2e-302	PREDICTED: LOW QUALITY PROTEIN: transcription factor MYC2-like [Camelina sativa]	332189094	CP002684.1	1513	0	Arabidopsis thaliana chromosome 1 sequence	K13422	MYC2	transcription factor MYC2	http://www.genome.jp/dbget-bin/www_bget?ko:K13422	Q39204	2650	2.9e-298	Transcription factor MYC2 OS=Arabidopsis thaliana GN=MYC2 PE=1 SV=2	PF00010	Helix-loop-helix DNA-binding domain	--	--	GO:0046983	protein dimerization activity	--	--	--	--	FALSE	-0.32485	1	UP	9.5445	0.0031538	UP	10.156	0.0013867	FALSE	-7.3987	0.89568
	1-2k.c6162/1/1588	10.9667	6.81	2.47333	1.59333	0.393333	0.236667	0.86	1584	291506702	ADE08783.1	1537	1.8e-168	phytochrome interacting factor 4 [Arabidopsis thaliana]>gi|291506704|gb|ADE08784.1| phytochrome interacting factor 4 [Arabidopsis thaliana]>gi|291506706|gb|ADE08785.1| phytochrome interacting factor 4 [Arabidopsis thaliana]>gi|291506708|gb|ADE08786.1| phytochrome interacting factor 4 [Arabidopsis thaliana]>gi|291506710|gb|ADE08787.1| phytochrome interacting factor 4 [Arabidopsis thaliana]>gi|2915…	30689217	NM_129862.2	941	0	Arabidopsis thaliana transcription factor PIF4 mRNA, complete cds	K16189	PIF4	phytochrome-interacting factor 4	http://www.genome.jp/dbget-bin/www_bget?ko:K16189	Q8W2F3	1530	1.6e-168	Transcription factor PIF4 OS=Arabidopsis thaliana GN=PIF4 PE=1 SV=1	PF00010	Helix-loop-helix DNA-binding domain	--	--	GO:0046983	protein dimerization activity	--	--	--	--	FALSE	-1.6066	1	DOWN	-3.8105	0.0041104	DOWN	-2.7129	0.017389	FALSE	-2.5577	0.82435
	1-2k.c6251/1/1896	12.5367	6.92667	3.97667	2.84333	3.38	3.77	2.78667	1878	4580456	AAD24380.1	1157	2.5e-124	unknown protein [Arabidopsis thaliana]	565479917	XM_006297537.1	818	0	Capsella rubella hypothetical protein (CARUB_v10013621mg) mRNA, complete cds	--	--	--	--	Q8GZM7	1163	7e-126	Transcription factor PIF1 OS=Arabidopsis thaliana GN=PIF1 PE=1 SV=1	PF00010	Helix-loop-helix DNA-binding domain	--	--	GO:0046983	protein dimerization activity	--	--	--	--	FALSE	-0.54098	1	FALSE	-2.2256	0.090536	DOWN	-2.077	0.045295	FALSE	-0.18036	1
	1-2k.c8442/1/2350.1	14.9767	21.23	6.93333	3.99	4.11667	4.61667	4.51333	1291	727611089	XP_010478689.1	1959	1.7e-217	PREDICTED: LOW QUALITY PROTEIN: transcription factor MYC2-like [Camelina sativa]	332189094	CP002684.1	965	0	Arabidopsis thaliana chromosome 1 sequence	K13422	MYC2	transcription factor MYC2	http://www.genome.jp/dbget-bin/www_bget?ko:K13422	Q39204	1933	2.5e-215	Transcription factor MYC2 OS=Arabidopsis thaliana GN=MYC2 PE=1 SV=2	PF00010	Helix-loop-helix DNA-binding domain	--	--	GO:0046983	protein dimerization activity	--	--	--	--	FALSE	-0.69245	1	FALSE	-1.7986	0.27032	FALSE	-1.8097	0.15107	FALSE	-0.71095	1
	1-2k.c9988/1/1714	10.38	7.73	2.51	0.85	0.34	1.76667	0.503333	1716	291506702	ADE08783.1	997	8.1e-106	phytochrome interacting factor 4 [Arabidopsis thaliana]>gi|291506704|gb|ADE08784.1| phytochrome interacting factor 4 [Arabidopsis thaliana]>gi|291506706|gb|ADE08785.1| phytochrome interacting factor 4 [Arabidopsis thaliana]>gi|291506708|gb|ADE08786.1| phytochrome interacting factor 4 [Arabidopsis thaliana]>gi|291506710|gb|ADE08787.1| phytochrome interacting factor 4 [Arabidopsis thaliana]>gi|2915…	13430617	AF360221.1	741	0	Arabidopsis thaliana unknown protein (At2g43010) mRNA, complete cds	K16189	PIF4	phytochrome-interacting factor 4	http://www.genome.jp/dbget-bin/www_bget?ko:K16189	Q8W2F3	990	7.3e-106	Transcription factor PIF4 OS=Arabidopsis thaliana GN=PIF4 PE=1 SV=1	PF00010	Helix-loop-helix DNA-binding domain	--	--	GO:0046983	protein dimerization activity	--	--	--	--	FALSE	-2.339	1	DOWN	-4.3946	0.0012172	DOWN	-3.5592	0.0013179	FALSE	-2.7985	0.68698
	2-3k.c16862/1/1427	42.0267	59.7633	17.55	14.9767	13.2433	12.0733	10.7533	1466	727611089	XP_010478689.1	2001	2.6e-222	PREDICTED: LOW QUALITY PROTEIN: transcription factor MYC2-like [Camelina sativa]	332189094	CP002684.1	1096	0	Arabidopsis thaliana chromosome 1 sequence	K13422	MYC2	transcription factor MYC2	http://www.genome.jp/dbget-bin/www_bget?ko:K13422	Q39204	1975	3.8e-220	Transcription factor MYC2 OS=Arabidopsis thaliana GN=MYC2 PE=1 SV=2	PF00010	Helix-loop-helix DNA-binding domain	--	--	GO:0046983	protein dimerization activity	--	--	--	--	FALSE	-0.74962	1	FALSE	-1.9959	0.069162	FALSE	-1.4092	0.12121	FALSE	-0.37094	1
	2-3k.c23994/1/1502	0	4.98667	0.303333	4.42667	0	6.09667	8.36333	1502	727611089	XP_010478689.1	1940	3.2e-215	PREDICTED: LOW QUALITY PROTEIN: transcription factor MYC2-like [Camelina sativa]	332189094	CP002684.1	1122	0	Arabidopsis thaliana chromosome 1 sequence	K13422	MYC2	transcription factor MYC2	http://www.genome.jp/dbget-bin/www_bget?ko:K13422	Q39204	1914	4.6e-213	Transcription factor MYC2 OS=Arabidopsis thaliana GN=MYC2 PE=1 SV=2	PF13291//PF00010	ACT domain//Helix-loop-helix DNA-binding domain	GO:0008152	metabolic process	GO:0046983//GO:0016597	protein dimerization activity//amino acid binding	--	--	--	--	FALSE	4.7626	0.32235	UP	Inf	0.0018482	UP	Inf	0.010962	FALSE	#NAME?	1
	2-3k.c8783/1/1077	11.2167	25.6567	3.72333	3.74333	0.443333	0.263333	0.16	808	727432535	XP_010494283.1	771	6.1e-80	PREDICTED: transcription factor bHLH55-like [Camelina sativa]	727619479	XM_010482143.1	412	0	PREDICTED: Camelina sativa transcription factor bHLH55-like (LOC104759186), mRNA	--	--	--	--	Q9LN95	748	4e-78	Transcription factor bHLH55 OS=Arabidopsis thaliana GN=BHLH55 PE=2 SV=1	PF00010//PF04574	Helix-loop-helix DNA-binding domain//Protein of unknown function (DUF592)	GO:0006476//GO:0006342//GO:0006355//GO:0006807	protein deacetylation//chromatin silencing//regulation of transcription, DNA-templated//nitrogen compound metabolic process	GO:0046983//GO:0016811//GO:0017136//GO:0008270//GO:0051287	protein dimerization activity//hydrolase activity, acting on carbon-nitrogen (but not peptide) bonds, in linear amides//NAD-dependent histone deacetylase activity//zinc ion binding//NAD binding	GO:0000118	histone deacetylase complex	--	--	FALSE	-4.6401	1	DOWN	-6.2481	0.005795	FALSE	-1.5226	0.63355	FALSE	-3.0169	0.99832
C3H	1-2k.c14533/1/1313	72.98	104.307	54.8733	31.02	11.37	23.0367	21.05	1310	727525389	XP_010438328.1	1480	6e-162	PREDICTED: zinc finger CCCH domain-containing protein 49 [Camelina sativa]>gi|727525391|ref|XP_010438329.1| PREDICTED: zinc finger CCCH domain-containing protein 49 [Camelina sativa]>gi|727525394|ref|XP_010438330.1| PREDICTED: zinc finger CCCH domain-containing protein 49 [Camelina sativa]	727525393	XM_010440028.1	944	0	PREDICTED: Camelina sativa zinc finger CCCH domain-containing protein 49 (LOC104721950), mRNA	--	--	--	--	Q9M0G2	1418	1.3e-155	Zinc finger CCCH domain-containing protein 49 OS=Arabidopsis thaliana GN=At4g29190 PE=2 SV=1	PF00642	Zinc finger C-x8-C-x5-C-x3-H type (and similar)	--	--	GO:0046872	metal ion binding	--	--	--	--	FALSE	-1.4582	1	FALSE	-1.8754	0.067875	FALSE	-1.1454	0.22711	DOWN	-2.2094	0.0097613
	1-2k.c15037/1/2257	58.3767	25.8833	56.8767	14.91	37.5067	51.3733	62.0067	2238	565472126	XP_006293865.1	2829	0	hypothetical protein CARUB_v10022848mg [Capsella rubella]>gi|482562573|gb|EOA26763.1| hypothetical protein CARUB_v10022848mg [Capsella rubella]	145360824	NM_129572.4	1631	0	Arabidopsis thaliana zinc finger CCCH domain-containing protein 29 mRNA, complete cds	--	--	--	--	Q9XEE6	2794	0	Zinc finger CCCH domain-containing protein 29 OS=Arabidopsis thaliana GN=At2g40140 PE=2 SV=1	PF00023//PF13606//PF00642	Ankyrin repeat//Ankyrin repeat//Zinc finger C-x8-C-x5-C-x3-H type (and similar)	--	--	GO:0005515//GO:0046872	protein binding//metal ion binding	--	--	--	--	FALSE	0.17342	1	FALSE	0.14712	1	DOWN	-1.8843	0.0089023	FALSE	-0.57093	0.99893
	1-2k.c17527/1/1813.1	10.23	8.79333	12.11	15.21	30.1733	10.61	15.16	937	297828742	XP_002882253.1	1175	1e-126	hypothetical protein ARALYDRAFT_477525 [Arabidopsis lyrata subsp. lyrata]>gi|297328093|gb|EFH58512.1| hypothetical protein ARALYDRAFT_477525 [Arabidopsis lyrata subsp. lyrata]	297828741	XM_002882207.1	718	0	Arabidopsis lyrata subsp. lyrata hypothetical protein, mRNA	--	--	--	--	Q8GXX7	1181	2.8e-128	Zinc finger CCCH domain-containing protein 33 OS=Arabidopsis thaliana GN=ZFN1 PE=1 SV=1	PF00642	Zinc finger C-x8-C-x5-C-x3-H type (and similar)	--	--	GO:0008270//GO:0046872//GO:0003676	zinc ion binding//metal ion binding//nucleic acid binding	--	--	--	--	FALSE	0.20322	1	FALSE	0.48596	1	FALSE	0.691	0.94601	FALSE	1.3492	0.47112
	1-2k.c17527/1/1813.2	12.59	11.4633	17.6867	26.2867	41.4	20.69	21.4833	820	565477888	XP_006296584.1	861	2.3e-90	hypothetical protein CARUB_v100138730mg, partial [Capsella rubella]>gi|482565293|gb|EOA29482.1| hypothetical protein CARUB_v100138730mg, partial [Capsella rubella]	297828741	XM_002882207.1	581	0	Arabidopsis lyrata subsp. lyrata hypothetical protein, mRNA	--	--	--	--	Q8GXX7	839	1.1e-88	Zinc finger CCCH domain-containing protein 33 OS=Arabidopsis thaliana GN=ZFN1 PE=1 SV=1	PF00642	Zinc finger C-x8-C-x5-C-x3-H type (and similar)	--	--	GO:0046872	metal ion binding	--	--	--	--	FALSE	0.15319	1	FALSE	0.73386	0.9354	FALSE	1.1764	0.52625	FALSE	1.2198	0.54419
	1-2k.c22228/1/1487	79.6133	74.56	65.2333	49.0833	22.31	15.6667	15.6067	1489	297836274	XP_002886019.1	1618	6.8e-178	hypothetical protein ARALYDRAFT_480488 [Arabidopsis lyrata subsp. lyrata]>gi|297331859|gb|EFH62278.1| hypothetical protein ARALYDRAFT_480488 [Arabidopsis lyrata subsp. lyrata]	330250293	CP002685.1	928	0	Arabidopsis thaliana chromosome 2, complete sequence	--	--	--	--	O82199	1583	1.1e-174	Zinc finger CCCH domain-containing protein 20 OS=Arabidopsis thaliana GN=At2g19810 PE=2 SV=1	PF00642	Zinc finger C-x8-C-x5-C-x3-H type (and similar)	--	--	GO:0008270//GO:0046872//GO:0003676	zinc ion binding//metal ion binding//nucleic acid binding	--	--	--	--	FALSE	-2.0824	0.32277	DOWN	-2.4181	0.010039	FALSE	-0.64742	0.75428	FALSE	-1.4779	0.49014
	1-2k.c22995/1/1471	144.537	140.447	92.9767	61.4567	23.0433	52.0433	45.73	1469	727550394	XP_010447881.1	1621	3e-178	PREDICTED: zinc finger CCCH domain-containing protein 49-like [Camelina sativa]	727525393	XM_010440028.1	1015	0	PREDICTED: Camelina sativa zinc finger CCCH domain-containing protein 49 (LOC104721950), mRNA	--	--	--	--	Q9M0G2	1518	3.7e-167	Zinc finger CCCH domain-containing protein 49 OS=Arabidopsis thaliana GN=At4g29190 PE=2 SV=1	PF00642	Zinc finger C-x8-C-x5-C-x3-H type (and similar)	--	--	GO:0046872	metal ion binding	--	--	--	--	FALSE	-1.1034	1	FALSE	-1.7177	0.082423	FALSE	-1.1372	0.17536	DOWN	-1.9653	0.00031934
	1-2k.c24212/1/1305	74.2267	78.2	58.66	29.9933	11.1267	26.34	19.97	1306	727550394	XP_010447881.1	1494	1.4e-163	PREDICTED: zinc finger CCCH domain-containing protein 49-like [Camelina sativa]	727525393	XM_010440028.1	932	0	PREDICTED: Camelina sativa zinc finger CCCH domain-containing protein 49 (LOC104721950), mRNA	--	--	--	--	Q9M0G2	1432	3.1e-157	Zinc finger CCCH domain-containing protein 49 OS=Arabidopsis thaliana GN=At4g29190 PE=2 SV=1	PF00642	Zinc finger C-x8-C-x5-C-x3-H type (and similar)	--	--	GO:0046872	metal ion binding	--	--	--	--	FALSE	-1.6294	0.80756	DOWN	-1.9749	0.049657	FALSE	-1.2103	0.18177	DOWN	-2.3315	0.012415
	1-2k.c2449/13/1744	44.08	40.9467	37.3033	28.5567	17.36	21.91	23.6233	1741	674932151	CDY01284.1	1430	5e-156	BnaC05g24480D [Brassica napus]	727436917	XM_010501478.1	1025	0	PREDICTED: Camelina sativa zinc finger CCCH domain-containing protein 12 (LOC104777267), mRNA	--	--	--	--	Q9LQM3	952	1.9e-101	Zinc finger CCCH domain-containing protein 12 OS=Arabidopsis thaliana GN=At1g32360 PE=2 SV=1	PF15202//PF08352//PF00642	Adipogenin//Oligopeptide/dipeptide transporter, C-terminal region//Zinc finger C-x8-C-x5-C-x3-H type (and similar)	GO:0015833//GO:0045444	peptide transport//fat cell differentiation	GO:0000166//GO:0005524//GO:0046872	nucleotide binding//ATP binding//metal ion binding	--	--	--	--	FALSE	-0.63758	1	FALSE	-0.86355	0.66481	FALSE	-0.5514	0.86872	FALSE	-1.0631	0.36062
	1-2k.c29967/1/2430	0	3.79333	1.74333	0.00666667	1.32	0.776667	1.96333	2325	297793397	XP_002864583.1	2723	7.9e-306	zinc finger (CCCH-type) family protein [Arabidopsis lyrata subsp. lyrata]>gi|297310418|gb|EFH40842.1| zinc finger (CCCH-type) family protein [Arabidopsis lyrata subsp. lyrata]	565432099	XM_006280133.1	1536	0	Capsella rubella hypothetical protein (CARUB_v10026101mg) mRNA, complete cds	--	--	--	--	Q9LUZ4	2713	1.6e-305	Zinc finger CCCH domain-containing protein 66 OS=Arabidopsis thaliana GN=At5g58620 PE=2 SV=1	PF00023//PF12515//PF00642//PF13606	Ankyrin repeat//Ca2+-ATPase N terminal autoinhibitory domain//Zinc finger C-x8-C-x5-C-x3-H type (and similar)//Ankyrin repeat	--	--	GO:0008270//GO:0005515//GO:0046872//GO:0005516//GO:0003676	zinc ion binding//protein binding//metal ion binding//calmodulin binding//nucleic acid binding	--	--	--	--	FALSE	0.17113	1	UP	Inf	0.0032789	FALSE	Inf	1	FALSE	-0.36685	1
	1-2k.c3110/1/2011	73	59.0967	48.92	23.27	19.87	24.3233	23.1933	2020	7573493	CAB87852.1	2657	3.1e-298	putative protein [Arabidopsis thaliana]	30694353	NM_115456.2	1470	0	Arabidopsis thaliana salt-inducible zinc finger 1 mRNA, complete cds	--	--	--	--	Q93ZS9	2645	1.1e-297	Zinc finger CCCH domain-containing protein 47 OS=Arabidopsis thaliana GN=At3g55980 PE=2 SV=1	PF00642//PF13606//PF02918//PF00023	Zinc finger C-x8-C-x5-C-x3-H type (and similar)//Ankyrin repeat//Pertussis toxin, subunit 2 and 3, C-terminal domain//Ankyrin repeat	GO:0009405	pathogenesis	GO:0005515//GO:0046872	protein binding//metal ion binding	GO:0005576	extracellular region	--	--	FALSE	-1.0577	1	FALSE	-1.6289	0.12793	DOWN	-1.5873	0.030855	FALSE	-1.2711	0.12245
	1-2k.c32251/1/1459	66.79	61.0633	57.0567	34.02	24.3633	24.7	28.3233	1460	297836274	XP_002886019.1	1526	3.1e-167	hypothetical protein ARALYDRAFT_480488 [Arabidopsis lyrata subsp. lyrata]>gi|297331859|gb|EFH62278.1| hypothetical protein ARALYDRAFT_480488 [Arabidopsis lyrata subsp. lyrata]	297836273	XM_002885973.1	879	0	Arabidopsis lyrata subsp. lyrata hypothetical protein, mRNA	--	--	--	--	O82199	1503	2e-165	Zinc finger CCCH domain-containing protein 20 OS=Arabidopsis thaliana GN=At2g19810 PE=2 SV=1	PF00642	Zinc finger C-x8-C-x5-C-x3-H type (and similar)	--	--	GO:0003676//GO:0046872//GO:0008270	nucleic acid binding//metal ion binding//zinc ion binding	--	--	--	--	FALSE	-1.0754	1	FALSE	-1.3335	0.27303	FALSE	-0.90504	0.46466	FALSE	-1.1655	0.29373
	1-2k.c32366/1/1672	31.6433	19.6133	16.97	9.1	6.59667	8.9	10.4767	1673	7573493	CAB87852.1	2157	2.4e-240	putative protein [Arabidopsis thaliana]	565465804	XM_006290732.1	1185	0	Capsella rubella hypothetical protein (CARUB_v10016897mg) mRNA, partial cds	--	--	--	--	Q93ZS9	2157	3.4e-241	Zinc finger CCCH domain-containing protein 47 OS=Arabidopsis thaliana GN=At3g55980 PE=2 SV=1	PF02918//PF00642	Pertussis toxin, subunit 2 and 3, C-terminal domain//Zinc finger C-x8-C-x5-C-x3-H type (and similar)	GO:0009405	pathogenesis	GO:0046872	metal ion binding	GO:0005576	extracellular region	--	--	FALSE	-0.6925	1	FALSE	-1.5755	0.20327	DOWN	-1.7265	0.042605	FALSE	-1.3356	0.44932
	1-2k.c3530/4/2207	0	5.98	1.57667	10.4467	0	4.69	2.85333	2184	565432100	XP_006280195.1	2724	5.7e-306	hypothetical protein CARUB_v10026101mg [Capsella rubella]>gi|565432103|ref|XP_006280196.1| hypothetical protein CARUB_v10026101mg [Capsella rubella]>gi|482548899|gb|EOA13093.1| hypothetical protein CARUB_v10026101mg [Capsella rubella]>gi|482548900|gb|EOA13094.1| hypothetical protein CARUB_v10026101mg [Capsella rubella]	30697105	NM_125249.2	1594	0	Arabidopsis thaliana zinc finger CCCH domain-containing protein 66 mRNA, complete cds	--	--	--	--	Q9LUZ4	2711	2.6e-305	Zinc finger CCCH domain-containing protein 66 OS=Arabidopsis thaliana GN=At5g58620 PE=2 SV=1	PF13606//PF00642//PF00023	Ankyrin repeat//Zinc finger C-x8-C-x5-C-x3-H type (and similar)//Ankyrin repeat	--	--	GO:0046872//GO:0005515	metal ion binding//protein binding	--	--	--	--	FALSE	0.86269	1	UP	Inf	0.03018	UP	Inf	0.0010867	FALSE	#NAME?	0.84905
	1-2k.c3571/1/1673	13.5167	11.4133	9.38333	8.37667	4.47333	1.15	1.51667	1671	297833390	XP_002884577.1	1925	1.9e-213	hypothetical protein ARALYDRAFT_477944 [Arabidopsis lyrata subsp. lyrata]>gi|297330417|gb|EFH60836.1| hypothetical protein ARALYDRAFT_477944 [Arabidopsis lyrata subsp. lyrata]	145338185	NM_111516.4	1252	0	Arabidopsis thaliana zinc finger CCCH domain-containing protein 34 mRNA, complete cds	--	--	--	--	Q9SQU4	1889	4.1e-210	Zinc finger CCCH domain-containing protein 34 OS=Arabidopsis thaliana GN=At3g06410 PE=2 SV=2	PF00642	Zinc finger C-x8-C-x5-C-x3-H type (and similar)	--	--	GO:0003676//GO:0046872//GO:0008270	nucleic acid binding//metal ion binding//zinc ion binding	--	--	--	--	FALSE	-2.6305	0.48316	DOWN	-3.2208	0.0085247	FALSE	-0.67183	0.92754	FALSE	-1.0131	1
	1-2k.c3812/2/2381	2.45333	6.89667	4.91	3.75333	7.71	4.62	4.59667	2386	565432100	XP_006280195.1	2724	6.2e-306	hypothetical protein CARUB_v10026101mg [Capsella rubella]>gi|565432103|ref|XP_006280196.1| hypothetical protein CARUB_v10026101mg [Capsella rubella]>gi|482548899|gb|EOA13093.1| hypothetical protein CARUB_v10026101mg [Capsella rubella]>gi|482548900|gb|EOA13094.1| hypothetical protein CARUB_v10026101mg [Capsella rubella]	30697105	NM_125249.2	1617	0	Arabidopsis thaliana zinc finger CCCH domain-containing protein 66 mRNA, complete cds	--	--	--	--	Q9LUZ4	2711	2.8e-305	Zinc finger CCCH domain-containing protein 66 OS=Arabidopsis thaliana GN=At5g58620 PE=2 SV=1	PF00642//PF13606//PF00023	Zinc finger C-x8-C-x5-C-x3-H type (and similar)//Ankyrin repeat//Ankyrin repeat	--	--	GO:0046872//GO:0005515	metal ion binding//protein binding	--	--	--	--	FALSE	-0.14688	1	FALSE	0.88649	0.85023	FALSE	0.72788	0.9598	FALSE	0.68935	1
	1-2k.c4447/1/1722	14.7167	13.2067	19.3567	31.89	40.2	25.1567	28.7533	1697	4928917	AAD33769.1	1996	1.1e-221	zinc finger protein 1 [Arabidopsis thaliana]	297828741	XM_002882207.1	1287	0	Arabidopsis lyrata subsp. lyrata hypothetical protein, mRNA	--	--	--	--	Q8GXX7	2007	8.5e-224	Zinc finger CCCH domain-containing protein 33 OS=Arabidopsis thaliana GN=ZFN1 PE=1 SV=1	PF00642	Zinc finger C-x8-C-x5-C-x3-H type (and similar)	--	--	GO:0046872	metal ion binding	--	--	--	--	FALSE	0.48109	1	FALSE	0.93271	0.64669	FALSE	1.1923	0.24384	FALSE	1.0544	0.33829
	1-2k.c7137/1/1917	4.44333	1.64	3.01667	1.82667	0.82	2.98333	4.62333	1899	565472678	XP_006294141.1	2128	6.4e-237	hypothetical protein CARUB_v10023134mg [Capsella rubella]>gi|482562849|gb|EOA27039.1| hypothetical protein CARUB_v10023134mg [Capsella rubella]	145331438	NM_001084609.1	1336	0	Arabidopsis thaliana zinc finger CCCH domain-containing protein 32 mRNA, complete cds	--	--	--	--	Q84W91	2115	2.9e-236	Zinc finger CCCH domain-containing protein 32 OS=Arabidopsis thaliana GN=At2g47850 PE=2 SV=2	PF00642	Zinc finger C-x8-C-x5-C-x3-H type (and similar)	--	--	GO:0046872	metal ion binding	--	--	--	--	FALSE	0.50177	1	FALSE	0.010018	1	FALSE	-1.1915	0.74092	FALSE	-1.9059	0.99061
	1-2k.c9966/4/2335	12.2633	16.75	26.5267	20.6433	27.6733	22.5667	33.6233	2303	565432100	XP_006280195.1	2724	6e-306	hypothetical protein CARUB_v10026101mg [Capsella rubella]>gi|565432103|ref|XP_006280196.1| hypothetical protein CARUB_v10026101mg [Capsella rubella]>gi|482548899|gb|EOA13093.1| hypothetical protein CARUB_v10026101mg [Capsella rubella]>gi|482548900|gb|EOA13094.1| hypothetical protein CARUB_v10026101mg [Capsella rubella]	565432102	XM_006280134.1	1657	0	Capsella rubella hypothetical protein (CARUB_v10026101mg) mRNA, complete cds	--	--	--	--	Q9LUZ4	2711	2.7e-305	Zinc finger CCCH domain-containing protein 66 OS=Arabidopsis thaliana GN=At5g58620 PE=2 SV=1	PF13606//PF00642//PF00023	Ankyrin repeat//Zinc finger C-x8-C-x5-C-x3-H type (and similar)//Ankyrin repeat	--	--	GO:0046872//GO:0005515	metal ion binding//protein binding	--	--	--	--	FALSE	0.3423	1	FALSE	1.4706	0.19952	FALSE	0.8315	0.88809	FALSE	0.090351	1
	2-3k.c21144/16/2933	10.12	11.2933	14.0933	4.81	20.9767	9.16	12.7	2868	565471874	XP_006293739.1	2980	0	hypothetical protein CARUB_v10022702mg [Capsella rubella]>gi|482562447|gb|EOA26637.1| hypothetical protein CARUB_v10022702mg [Capsella rubella]	145360895	NM_129754.3	2003	0	Arabidopsis thaliana zinc finger CCCH domain-containing protein 30 mRNA, complete cds	--	--	--	--	P93755	2914	0	Zinc finger CCCH domain-containing protein 30 OS=Arabidopsis thaliana GN=At2g41900 PE=1 SV=2	PF13606//PF00642//PF05929//PF00023	Ankyrin repeat//Zinc finger C-x8-C-x5-C-x3-H type (and similar)//Phage capsid scaffolding protein (GPO) serine peptidase//Ankyrin repeat	GO:0019069	viral capsid assembly	GO:0005515//GO:0046872	protein binding//metal ion binding	--	--	--	--	FALSE	-0.25251	1	FALSE	0.21127	1	FALSE	-0.93805	0.85105	FALSE	0.6441	1
	2-3k.c5483/1/2969	2.04	1.53667	1.60333	1.99667	0.0533333	1.69	2.31333	2969	727442546	XP_010502777.1	3898	0	PREDICTED: zinc finger CCCH domain-containing protein 41 [Camelina sativa]>gi|727442548|ref|XP_010502778.1| PREDICTED: zinc finger CCCH domain-containing protein 41 [Camelina sativa]	30688890	NM_180677.1	2222	0	Arabidopsis thaliana zinc finger CCCH domain-containing protein mRNA, complete cds	K13192	RBM26	RNA-binding protein 26	http://www.genome.jp/dbget-bin/www_bget?ko:K13192	Q9LVX1	3858	0	Zinc finger CCCH domain-containing protein 41 OS=Arabidopsis thaliana GN=At3g27700 PE=1 SV=1	PF08675//PF00076//PF00642	RNA binding domain//RNA recognition motif. (a.k.a. RRM, RBD, or RNP domain)//Zinc finger C-x8-C-x5-C-x3-H type (and similar)	GO:0051252//GO:0006402	regulation of RNA metabolic process//mRNA catabolic process	GO:0046872//GO:0003676//GO:0003723//GO:0004535	metal ion binding//nucleic acid binding//RNA binding//poly(A)-specific ribonuclease activity	GO:0005634//GO:0005737	nucleus//cytoplasm	KOG2135	Proteins containing the RNA recognition motif	FALSE	0.55467	1	FALSE	0.22073	1	FALSE	0.025969	1	FALSE	-4.931	0.10063
	2-3k.c5960/1/1427	34.7467	43.0767	21.0233	14.3233	3.56	1.18333	0.716667	1420	297791433	XP_002863601.1	1192	1.6e-128	zinc finger (CCCH-type) family protein [Arabidopsis lyrata subsp. lyrata]>gi|297309436|gb|EFH39860.1| zinc finger (CCCH-type) family protein [Arabidopsis lyrata subsp. lyrata]	332002898	CP002688.1	756	0	Arabidopsis thaliana chromosome 5 sequence	--	--	--	--	Q9FKW2	1216	3.8e-132	Zinc finger CCCH domain-containing protein 61 OS=Arabidopsis thaliana GN=At5g44260 PE=2 SV=1	PF00542//PF00642	Ribosomal protein L7/L12 C-terminal domain//Zinc finger C-x8-C-x5-C-x3-H type (and similar)	GO:0006412//GO:0042254	translation//ribosome biogenesis	GO:0003735//GO:0046872	structural constituent of ribosome//metal ion binding	GO:0005840	ribosome	--	--	DOWN	-4.9706	0.0014407	DOWN	-5.7302	7.0185e-08	FALSE	-1.2226	0.26332	DOWN	-2.5011	0.0072081
	2-3k.c9147/1/1430	30.6467	33.32	23.82	16.6333	5.83667	3.69667	2.54	1428	297791433	XP_002863601.1	1198	3.3e-129	zinc finger (CCCH-type) family protein [Arabidopsis lyrata subsp. lyrata]>gi|297309436|gb|EFH39860.1| zinc finger (CCCH-type) family protein [Arabidopsis lyrata subsp. lyrata]	332002898	CP002688.1	759	0	Arabidopsis thaliana chromosome 5 sequence	--	--	--	--	Q9FKW2	1217	2.9e-132	Zinc finger CCCH domain-containing protein 61 OS=Arabidopsis thaliana GN=At5g44260 PE=2 SV=1	PF00642//PF02984//PF04579	Zinc finger C-x8-C-x5-C-x3-H type (and similar)//Cyclin, C-terminal domain//Keratin, high-sulphur matrix protein	--	--	GO:0005198//GO:0046872	structural molecule activity//metal ion binding	GO:0045095//GO:0005634	keratin filament//nucleus	--	--	DOWN	-3.3516	0.048111	DOWN	-3.747	0.00040508	FALSE	-0.8399	0.6488	DOWN	-1.9876	0.033241
	2-3k.c9951/1/835	229.09	44.11	14.0967	7.67667	3.6	11.2733	16.4233	835	565474122	XP_006294702.1	978	6.2e-104	hypothetical protein CARUB_v10023740mg [Capsella rubella]>gi|482563410|gb|EOA27600.1| hypothetical protein CARUB_v10023740mg [Capsella rubella]	565474121	XM_006294640.1	363	0	Capsella rubella hypothetical protein (CARUB_v10023740mg) mRNA, complete cds	--	--	--	--	O82307	922	2.7e-98	Zinc finger CCCH domain-containing protein 23 OS=Arabidopsis thaliana GN=At2g25900 PE=2 SV=1	PF00642//PF01852	Zinc finger C-x8-C-x5-C-x3-H type (and similar)//START domain	--	--	GO:0008289//GO:0046872	lipid binding//metal ion binding	--	--	--	--	FALSE	0.2344	1	DOWN	-3.7953	0.00048775	DOWN	-4.8411	8.4213e-06	FALSE	-1.928	0.63258
PHD	1-2k.c31934/1/2208	0.04	2.72	0.25	0	1.40667	0	2.33333	2214	565471750	XP_006293677.1	3157	0	hypothetical protein CARUB_v10022635mg [Capsella rubella]>gi|482562385|gb|EOA26575.1| hypothetical protein CARUB_v10022635mg [Capsella rubella]	565471749	XM_006293615.1	1858	0	Capsella rubella hypothetical protein (CARUB_v10022635mg) mRNA, complete cds	--	--	--	--	F4IXE7	230	1.3e-17	Increased DNA methylation 1 OS=Arabidopsis thaliana GN=IDM1 PE=1 SV=1	PF01342//PF13508//PF13673//PF00628	SAND domain//Acetyltransferase (GNAT) domain//Acetyltransferase (GNAT) domain//PHD-finger	GO:0042967	acyl-carrier-protein biosynthetic process	GO:0003677//GO:0005515//GO:0008080	DNA binding//protein binding//N-acetyltransferase activity	--	--	--	--	FALSE	3.3129	0.86372	UP	5.7223	0.01707	FALSE	#NAME?	1	FALSE	2.5845	1
	2-3k.c12576/3/3052	0.62	1.42667	3.55333	6.39667	1.52333	6.02	6.77	3041	727582371	XP_010464100.1	2602	1.1e-291	PREDICTED: uncharacterized protein LOC104744710 [Camelina sativa]>gi|727582373|ref|XP_010464101.1| PREDICTED: uncharacterized protein LOC104744710 [Camelina sativa]	30679564	NM_111440.2	2135	0	Arabidopsis thaliana RING/U-box protein mRNA, complete cds	--	--	--	--	Q9V8P9	155	8.6e-09	E3 ubiquitin-protein ligase Topors OS=Drosophila melanogaster GN=Topors PE=1 SV=1	PF03608//PF12861//PF00097//PF13639//PF00628//PF12678//PF14634//PF03854	PTS system enzyme II sorbitol-specific factor//Anaphase-promoting complex subunit 11 RING-H2 finger//Zinc finger, C3HC4 type (RING finger)//Ring finger domain//PHD-finger//RING-H2 zinc finger//zinc-RING finger domain//P-11 zinc finger	GO:0009401//GO:0016567	phosphoenolpyruvate-dependent sugar phosphotransferase system//protein ubiquitination	GO:0008270//GO:0004842//GO:0003723//GO:0046872//GO:0005515	zinc ion binding//ubiquitin-protein transferase activity//RNA binding//metal ion binding//protein binding	GO:0016021//GO:0005680	integral component of membrane//anaphase-promoting complex	--	--	FALSE	0.91744	1	FALSE	3.4155	0.06398	UP	3.3247	0.033719	FALSE	-1.2369	1
	2-3k.c14205/1/3462	0.0633333	0.513333	1.14	1.79333	0	1.72667	2.22667	3458	565497962	XP_006306620.1	4264	0	hypothetical protein CARUB_v10008137mg [Capsella rubella]>gi|482575331|gb|EOA39518.1| hypothetical protein CARUB_v10008137mg [Capsella rubella]	727570215	XM_010459324.1	2261	0	PREDICTED: Camelina sativa uncharacterized LOC104739076 (LOC104739076), transcript variant X2, mRNA >gnl|BL_ORD_ID|26259419 PREDICTED: Camelina sativa uncharacterized LOC104739076 (LOC104739076), transcript variant X3, mRNA	--	--	--	--	F4IXE7	848	4.3e-89	Increased DNA methylation 1 OS=Arabidopsis thaliana GN=IDM1 PE=1 SV=1	PF02668//PF16866//PF00130//PF13508//PF13673//PF00628	Taurine catabolism dioxygenase TauD, TfdA family//PHD-finger//Phorbol esters/diacylglycerol binding domain (C1 domain)//Acetyltransferase (GNAT) domain//Acetyltransferase (GNAT) domain//PHD-finger	GO:0042967//GO:0035556//GO:0055114	acyl-carrier-protein biosynthetic process//intracellular signal transduction//oxidation-reduction process	GO:0016491//GO:0008080//GO:0005515	oxidoreductase activity//N-acetyltransferase activity//protein binding	--	--	--	--	FALSE	0.95635	1	FALSE	5.4662	0.092292	FALSE	5.0903	0.080059	FALSE	#NAME?	0.82114
	2-3k.c1564/10/3061	7.74	11.74	12.7167	7.51	15.8767	5.85667	3.84667	3007	727582371	XP_010464100.1	2616	2.6e-293	PREDICTED: uncharacterized protein LOC104744710 [Camelina sativa]>gi|727582373|ref|XP_010464101.1| PREDICTED: uncharacterized protein LOC104744710 [Camelina sativa]	30679564	NM_111440.2	2096	0	Arabidopsis thaliana RING/U-box protein mRNA, complete cds	--	--	--	--	Q9V8P9	155	8.5e-09	E3 ubiquitin-protein ligase Topors OS=Drosophila melanogaster GN=Topors PE=1 SV=1	PF14634//PF13639//PF00628//PF00097//PF03608//PF03854//PF12678	zinc-RING finger domain//Ring finger domain//PHD-finger//Zinc finger, C3HC4 type (RING finger)//PTS system enzyme II sorbitol-specific factor//P-11 zinc finger//RING-H2 zinc finger	GO:0009401	phosphoenolpyruvate-dependent sugar phosphotransferase system	GO:0008270//GO:0005515//GO:0046872//GO:0003723	zinc ion binding//protein binding//metal ion binding//RNA binding	GO:0016021	integral component of membrane	--	--	FALSE	-1.7801	0.73302	FALSE	-1.0784	0.58703	FALSE	0.036714	1	FALSE	0.36698	1
	2-3k.c15741/1/2918	0.62	0.58	0.886667	1.94667	1.88333	2.39	4.92667	2902	727582371	XP_010464100.1	2616	2.5e-293	PREDICTED: uncharacterized protein LOC104744710 [Camelina sativa]>gi|727582373|ref|XP_010464101.1| PREDICTED: uncharacterized protein LOC104744710 [Camelina sativa]	30679564	NM_111440.2	2055	0	Arabidopsis thaliana RING/U-box protein mRNA, complete cds	--	--	--	--	Q9V8P9	155	8.2e-09	E3 ubiquitin-protein ligase Topors OS=Drosophila melanogaster GN=Topors PE=1 SV=1	PF12678//PF03854//PF00097//PF14634//PF00628//PF13639//PF03608	RING-H2 zinc finger//P-11 zinc finger//Zinc finger, C3HC4 type (RING finger)//zinc-RING finger domain//PHD-finger//Ring finger domain//PTS system enzyme II sorbitol-specific factor	GO:0009401	phosphoenolpyruvate-dependent sugar phosphotransferase system	GO:0046872//GO:0005515//GO:0003723//GO:0008270	metal ion binding//protein binding//RNA binding//zinc ion binding	GO:0016021	integral component of membrane	--	--	FALSE	2.4853	0.59595	UP	3.0478	0.035905	FALSE	1.7861	0.56683	FALSE	1.1358	1
	2-3k.c17059/1/2991	0.366667	0.95	0.656667	1.76333	2.31	0.18	0	2996	729316561	XP_010531959.1	4002	0	PREDICTED: histone acetyltransferase HAC1-like [Tarenaya hassleriana]>gi|729316564|ref|XP_010531961.1| PREDICTED: histone acetyltransferase HAC1-like [Tarenaya hassleriana]>gi|729316567|ref|XP_010531962.1| PREDICTED: histone acetyltransferase HAC1-like [Tarenaya hassleriana]	727602898	XM_010476183.1	2327	0	PREDICTED: Camelina sativa histone acetyltransferase HAC1-like (LOC104754023), mRNA	K04498	EP300, CREBBP, KAT3	E1A/CREB-binding protein	http://www.genome.jp/dbget-bin/www_bget?ko:K04498	Q9C5X9	4178	0	Histone acetyltransferase HAC1 OS=Arabidopsis thaliana GN=HAC1 PE=1 SV=2	PF00628//PF08214//PF00569//PF09271//PF02135	PHD-finger//Histone acetylation protein//Zinc finger, ZZ type//LAG1, DNA binding//TAZ zinc finger	GO:0042967//GO:0006355//GO:0016573	acyl-carrier-protein biosynthetic process//regulation of transcription, DNA-templated//histone acetylation	GO:0005515//GO:0008270//GO:0004402//GO:0003700//GO:0003712//GO:0003677	protein binding//zinc ion binding//histone acetyltransferase activity//transcription factor activity, sequence-specific DNA binding//transcription cofactor activity//DNA binding	GO:0005634//GO:0005667//GO:0000123	nucleus//transcription factor complex//histone acetyltransferase complex	KOG1778	CREB binding protein/P300 and related TAZ Zn-finger proteins	FALSE	#NAME?	1	FALSE	#NAME?	0.47686	FALSE	2.3	0.99928	FALSE	1.8309	1
	2-3k.c19056/1/2923	2.82	3.69667	3.24667	0.333333	4.62667	1.8	2.50667	2957	565478620	XP_006296950.1	3041	0	hypothetical protein CARUB_v10012943mg [Capsella rubella]>gi|565478622|ref|XP_006296951.1| hypothetical protein CARUB_v10012943mg [Capsella rubella]>gi|565478624|ref|XP_006296952.1| hypothetical protein CARUB_v10012943mg [Capsella rubella]>gi|482565659|gb|EOA29848.1| hypothetical protein CARUB_v10012943mg [Capsella rubella]>gi|482565660|gb|EOA29849.1| hypothetical protein CARUB_v10012943mg [Capse…	565478619	XM_006296888.1	2088	0	Capsella rubella hypothetical protein (CARUB_v10012943mg) mRNA, complete cds	--	--	--	--	Q9V8P9	152	1.9e-08	E3 ubiquitin-protein ligase Topors OS=Drosophila melanogaster GN=Topors PE=1 SV=1	PF03854//PF14634//PF16685//PF12678//PF00097//PF12861//PF13639//PF00628	P-11 zinc finger//zinc-RING finger domain//zinc RING finger of MSL2//RING-H2 zinc finger//Zinc finger, C3HC4 type (RING finger)//Anaphase-promoting complex subunit 11 RING-H2 finger//Ring finger domain//PHD-finger	GO:0016567	protein ubiquitination	GO:0061630//GO:0005515//GO:0046872//GO:0003723//GO:0008270//GO:0004842	ubiquitin protein ligase activity//protein binding//metal ion binding//RNA binding//zinc ion binding//ubiquitin-protein transferase activity	GO:0005680	anaphase-promoting complex	--	--	FALSE	-0.43589	1	FALSE	-0.21933	1	FALSE	-2.9521	0.39104	FALSE	0.57234	1
	2-3k.c24304/1/2722	0.93	1.41667	0.31	0	0.183333	0.47	0.226667	2721	565478422	XP_006296851.1	3677	0	hypothetical protein CARUB_v10012838mg [Capsella rubella]>gi|565478424|ref|XP_006296852.1| hypothetical protein CARUB_v10012838mg [Capsella rubella]>gi|482565560|gb|EOA29749.1| hypothetical protein CARUB_v10012838mg [Capsella rubella]>gi|482565561|gb|EOA29750.1| hypothetical protein CARUB_v10012838mg [Capsella rubella]	727413743	XM_010504101.1	2136	0	PREDICTED: Camelina sativa uncharacterized LOC104779699 (LOC104779699), mRNA	--	--	--	--	F4IXE7	3626	0	Increased DNA methylation 1 OS=Arabidopsis thaliana GN=IDM1 PE=1 SV=1	PF00583//PF00628//PF13673//PF13508	Acetyltransferase (GNAT) family//PHD-finger//Acetyltransferase (GNAT) domain//Acetyltransferase (GNAT) domain	GO:0042967	acyl-carrier-protein biosynthetic process	GO:0008080//GO:0005515	N-acetyltransferase activity//protein binding	--	--	--	--	FALSE	-0.53895	1	FALSE	-2.1508	0.80589	DOWN	#NAME?	0.03566	FALSE	-0.7273	1
	2-3k.c6362/2/3231	0	0.256667	0.63	0.81	0	1.13	0.276667	3280	565497962	XP_006306620.1	4091	0	hypothetical protein CARUB_v10008137mg [Capsella rubella]>gi|482575331|gb|EOA39518.1| hypothetical protein CARUB_v10008137mg [Capsella rubella]	727570215	XM_010459324.1	2264	0	PREDICTED: Camelina sativa uncharacterized LOC104739076 (LOC104739076), transcript variant X2, mRNA >gnl|BL_ORD_ID|26259419 PREDICTED: Camelina sativa uncharacterized LOC104739076 (LOC104739076), transcript variant X3, mRNA	--	--	--	--	F4IXE7	849	3.1e-89	Increased DNA methylation 1 OS=Arabidopsis thaliana GN=IDM1 PE=1 SV=1	PF02668//PF00628//PF13673//PF00130//PF13508	Taurine catabolism dioxygenase TauD, TfdA family//PHD-finger//Acetyltransferase (GNAT) domain//Phorbol esters/diacylglycerol binding domain (C1 domain)//Acetyltransferase (GNAT) domain	GO:0035556//GO:0042967//GO:0055114	intracellular signal transduction//acyl-carrier-protein biosynthetic process//oxidation-reduction process	GO:0005515//GO:0008080//GO:0016491	protein binding//N-acetyltransferase activity//oxidoreductase activity	--	--	--	--	FALSE	-1.3534	1	FALSE	Inf	0.61335	FALSE	Inf	0.26885	FALSE	#NAME?	0.91249
	2-3k.c8057/1/3182	1.17333	1.68333	1.14	3.56	0	1.87667	1.35333	3184	334186543	NP_193228.6	4276	0	Acyl-CoA N-acyltransferase with RING/FYVE/PHD-type zinc finger protein [Arabidopsis thaliana]>gi|225898777|dbj|BAH30519.1| hypothetical protein [Arabidopsis thaliana]>gi|332658123|gb|AEE83523.1| Acyl-CoA N-acyltransferase with RING/FYVE/PHD-type zinc finger protein [Arabidopsis thaliana]	334186542	NM_117578.6	2281	0	Arabidopsis thaliana Acyl-CoA N-acyltransferase with RING/FYVE/PHD-type zinc finger protein mRNA, complete cds	--	--	--	--	F4IXE7	797	3.3e-83	Increased DNA methylation 1 OS=Arabidopsis thaliana GN=IDM1 PE=1 SV=1	PF01429//PF14604//PF00628//PF13508//PF13673	Methyl-CpG binding domain//Variant SH3 domain//PHD-finger//Acetyltransferase (GNAT) domain//Acetyltransferase (GNAT) domain	GO:0006355//GO:0042967	regulation of transcription, DNA-templated//acyl-carrier-protein biosynthetic process	GO:0008270//GO:0003677//GO:0005515//GO:0008080	zinc ion binding//DNA binding//protein binding//N-acetyltransferase activity	GO:0005634	nucleus	--	--	FALSE	0.20372	1	FALSE	0.22807	1	FALSE	1.6768	0.31261	FALSE	#NAME?	0.10999
	2-3k.c9292/2/3139	1.44667	1.35	0.753333	1.22667	0	1.03333	1.2	3091	674951595	CDX81777.1	3939	0	BnaC08g38240D [Brassica napus]	727607368	XM_010478487.1	2283	0	PREDICTED: Camelina sativa histone acetyltransferase HAC12-like (LOC104755992), transcript variant X2, mRNA	K04498	EP300, CREBBP, KAT3	E1A/CREB-binding protein	http://www.genome.jp/dbget-bin/www_bget?ko:K04498	Q9FWQ5	4135	0	Histone acetyltransferase HAC12 OS=Arabidopsis thaliana GN=HAC12 PE=2 SV=2	PF00628//PF00569//PF08214//PF02135	PHD-finger//Zinc finger, ZZ type//Histone acetylation protein//TAZ zinc finger	GO:0016573//GO:0006355//GO:0042967	histone acetylation//regulation of transcription, DNA-templated//acyl-carrier-protein biosynthetic process	GO:0003712//GO:0004402//GO:0008270//GO:0005515	transcription cofactor activity//histone acetyltransferase activity//zinc ion binding//protein binding	GO:0000123//GO:0005634//GO:0005667	histone acetyltransferase complex//nucleus//transcription factor complex	KOG1778	CREB binding protein/P300 and related TAZ Zn-finger proteins	FALSE	0.55393	1	FALSE	-0.29673	1	FALSE	-0.15267	1	FALSE	#NAME?	0.16431
	3-6k.c1379/7/4113	2.66333	0.983333	1.70667	2.13	0.213333	1.32333	0.276667	4057	565478422	XP_006296851.1	4990	0	hypothetical protein CARUB_v10012838mg [Capsella rubella]>gi|565478424|ref|XP_006296852.1| hypothetical protein CARUB_v10012838mg [Capsella rubella]>gi|482565560|gb|EOA29749.1| hypothetical protein CARUB_v10012838mg [Capsella rubella]>gi|482565561|gb|EOA29750.1| hypothetical protein CARUB_v10012838mg [Capsella rubella]	727413743	XM_010504101.1	2798	0	PREDICTED: Camelina sativa uncharacterized LOC104779699 (LOC104779699), mRNA	--	--	--	--	F4IXE7	4934	0	Increased DNA methylation 1 OS=Arabidopsis thaliana GN=IDM1 PE=1 SV=1	PF00628//PF13673//PF00130//PF13508//PF01429//PF00583	PHD-finger//Acetyltransferase (GNAT) domain//Phorbol esters/diacylglycerol binding domain (C1 domain)//Acetyltransferase (GNAT) domain//Methyl-CpG binding domain//Acetyltransferase (GNAT) family	GO:0042967//GO:0035556	acyl-carrier-protein biosynthetic process//intracellular signal transduction	GO:0008080//GO:0005515//GO:0003677	N-acetyltransferase activity//protein binding//DNA binding	GO:0005634	nucleus	--	--	FALSE	-2.6771	1	DOWN	-3.3151	0.043468	FALSE	-0.17477	1	FALSE	-2.8646	0.96396
	3-6k.c1404/10/4448	0.403333	1.05333	1.63	3.94333	4.07667	5.4	4.87333	4445	565477067	XP_006296174.1	6338	0	hypothetical protein CARUB_v10025333mg [Capsella rubella]>gi|482564882|gb|EOA29072.1| hypothetical protein CARUB_v10025333mg [Capsella rubella]	727482819	XM_010418976.1	3722	0	PREDICTED: Camelina sativa CHD3-type chromatin-remodeling factor PICKLE (LOC104703045), transcript variant X1, mRNA	K11643	CHD4, MI2B	chromodomain-helicase-DNA-binding protein 4	http://www.genome.jp/dbget-bin/www_bget?ko:K11643	Q9S775	6258	0	CHD3-type chromatin-remodeling factor PICKLE OS=Arabidopsis thaliana GN=PKL PE=1 SV=1	PF12861//PF00628//PF16866//PF09111//PF00130//PF04851//PF08074//PF00176	Anaphase-promoting complex subunit 11 RING-H2 finger//PHD-finger//PHD-finger//SLIDE//Phorbol esters/diacylglycerol binding domain (C1 domain)//Type III restriction enzyme, res subunit//CHDCT2 (NUC038) domain//SNF2 family N-terminal domain	GO:0035556//GO:0016567//GO:0006338//GO:0006355	intracellular signal transduction//protein ubiquitination//chromatin remodeling//regulation of transcription, DNA-templated	GO:0003677//GO:0008270//GO:0016787//GO:0004842//GO:0016818//GO:0005515//GO:0005524//GO:0003676	DNA binding//zinc ion binding//hydrolase activity//ubiquitin-protein transferase activity//hydrolase activity, acting on acid anhydrides, in phosphorus-containing anhydrides//protein binding//ATP binding//nucleic acid binding	GO:0005634//GO:0005680	nucleus//anaphase-promoting complex	KOG0383	Predicted helicase	FALSE	1.5536	1	UP	3.5416	0.0076774	UP	3.2802	0.001293	FALSE	1.3204	0.5439
	3-6k.c14957/1/4184	0.05	0.29	0.0966667	0.0533333	0	0.636667	0.703333	4163	565486603	XP_006300941.1	5699	0	hypothetical protein CARUB_v10021321mg [Capsella rubella]>gi|482569651|gb|EOA33839.1| hypothetical protein CARUB_v10021321mg [Capsella rubella]	727599617	XM_010474488.1	1979	0	PREDICTED: Camelina sativa protein strawberry notch (LOC104752370), mRNA	--	--	--	--	A8JUV0	981	2e-104	Protein strawberry notch OS=Drosophila melanogaster GN=sno PE=1 SV=1	PF01155//PF00628//PF01047//PF04851//PF00130//PF16866	Hydrogenase/urease nickel incorporation, metallochaperone, hypA//PHD-finger//MarR family//Type III restriction enzyme, res subunit//Phorbol esters/diacylglycerol binding domain (C1 domain)//PHD-finger	GO:0006355//GO:0006464//GO:0035556	regulation of transcription, DNA-templated//cellular protein modification process//intracellular signal transduction	GO:0003700//GO:0016787//GO:0016151//GO:0005524//GO:0005515//GO:0003677	transcription factor activity, sequence-specific DNA binding//hydrolase activity//nickel cation binding//ATP binding//protein binding//DNA binding	GO:0005667	transcription factor complex	KOG1513	Nuclear helicase MOP-3/SNO (DEAD-box superfamily)	FALSE	2.7859	1	FALSE	3.7168	0.29049	FALSE	-0.074341	1	FALSE	#NAME?	1
	3-6k.c15351/1/3931	0	0.96	1.28	5.14333	0.446667	3.86	2.57333	3919	297851774	XP_002893768.1	1504	3e-164	PHD finger family protein [Arabidopsis lyrata subsp. lyrata]>gi|297339610|gb|EFH70027.1| PHD finger family protein [Arabidopsis lyrata subsp. lyrata]	110741886	AK226787.1	1218	0	Arabidopsis thaliana mRNA for hypothetical protein, complete cds, clone: RAFL07-87-M22	--	--	--	--	Q9C810	1447	1.7e-158	PHD finger protein At1g33420 OS=Arabidopsis thaliana GN=At1g33420 PE=1 SV=1	PF16866//PF00628	PHD-finger//PHD-finger	--	--	GO:0005515//GO:0046872//GO:0008270	protein binding//metal ion binding//zinc ion binding	--	--	--	--	FALSE	1.0476	1	FALSE	Inf	0.06789	UP	Inf	0.00088926	FALSE	-1.5677	1
	3-6k.c4534/1/4507.1	0	0.506667	0.143333	0.82	0.873333	0.00333333	1.69	2991	727599081	XP_010472518.1	4597	0	PREDICTED: CHD3-type chromatin-remodeling factor PICKLE-like [Camelina sativa]	727482819	XM_010418976.1	2620	0	PREDICTED: Camelina sativa CHD3-type chromatin-remodeling factor PICKLE (LOC104703045), transcript variant X1, mRNA	K11643	CHD4, MI2B	chromodomain-helicase-DNA-binding protein 4	http://www.genome.jp/dbget-bin/www_bget?ko:K11643	Q9S775	4585	0	CHD3-type chromatin-remodeling factor PICKLE OS=Arabidopsis thaliana GN=PKL PE=1 SV=1	PF12678//PF00176//PF04851//PF16866//PF00130//PF00628//PF12861	RING-H2 zinc finger//SNF2 family N-terminal domain//Type III restriction enzyme, res subunit//PHD-finger//Phorbol esters/diacylglycerol binding domain (C1 domain)//PHD-finger//Anaphase-promoting complex subunit 11 RING-H2 finger	GO:0016567//GO:0035556	protein ubiquitination//intracellular signal transduction	GO:0005524//GO:0005515//GO:0008270//GO:0004842//GO:0016787//GO:0003677	ATP binding//protein binding//zinc ion binding//ubiquitin-protein transferase activity//hydrolase activity//DNA binding	GO:0005680	anaphase-promoting complex	KOG0383	Predicted helicase	FALSE	3.4755	0.88602	UP	Inf	0.0055119	FALSE	Inf	0.54433	FALSE	2.6682	1
	3-6k.c5265/1/3495	0	0.63	1.41333	2.41	0	2.02667	2.78333	3478	565487305	XP_006301292.1	4855	0	hypothetical protein CARUB_v10021700mg [Capsella rubella]>gi|482570002|gb|EOA34190.1| hypothetical protein CARUB_v10021700mg [Capsella rubella]	727602898	XM_010476183.1	2688	0	PREDICTED: Camelina sativa histone acetyltransferase HAC1-like (LOC104754023), mRNA	K04498	EP300, CREBBP, KAT3	E1A/CREB-binding protein	http://www.genome.jp/dbget-bin/www_bget?ko:K04498	Q9C5X9	4827	0	Histone acetyltransferase HAC1 OS=Arabidopsis thaliana GN=HAC1 PE=1 SV=2	PF00628//PF08214//PF00569//PF09271//PF02135	PHD-finger//Histone acetylation protein//Zinc finger, ZZ type//LAG1, DNA binding//TAZ zinc finger	GO:0016573//GO:0042967//GO:0006355	histone acetylation//acyl-carrier-protein biosynthetic process//regulation of transcription, DNA-templated	GO:0003712//GO:0003677//GO:0005515//GO:0004402//GO:0008270//GO:0003700	transcription cofactor activity//DNA binding//protein binding//histone acetyltransferase activity//zinc ion binding//transcription factor activity, sequence-specific DNA binding	GO:0005634//GO:0005667//GO:0000123	nucleus//transcription factor complex//histone acetyltransferase complex	KOG1778	CREB binding protein/P300 and related TAZ Zn-finger proteins	FALSE	0.99691	1	UP	Inf	0.033896	UP	Inf	0.0013683	FALSE	#NAME?	0.792
	3-6k.c5616/2/4009	1.43	1.03	0.843333	0.0733333	1.95	0.67	0.83	3907	297851774	XP_002893768.1	1504	3e-164	PHD finger family protein [Arabidopsis lyrata subsp. lyrata]>gi|297339610|gb|EFH70027.1| PHD finger family protein [Arabidopsis lyrata subsp. lyrata]	110741886	AK226787.1	1218	0	Arabidopsis thaliana mRNA for hypothetical protein, complete cds, clone: RAFL07-87-M22	--	--	--	--	Q9C810	1447	1.7e-158	PHD finger protein At1g33420 OS=Arabidopsis thaliana GN=At1g33420 PE=1 SV=1	PF16866//PF00628	PHD-finger//PHD-finger	--	--	GO:0008270//GO:0005515//GO:0046872	zinc ion binding//protein binding//metal ion binding	--	--	--	--	FALSE	-0.026588	1	FALSE	-0.85066	0.90307	DOWN	-4.1352	0.034311	FALSE	1.3581	1
	3-6k.c678/7/4310	3.7	3.11667	2.98667	0.36	2.37	4.17	3.34	4286	334184015	NP_178053.4	5921	0	protein EMBRYO DEFECTIVE 1135 [Arabidopsis thaliana]>gi|332198112|gb|AEE36233.1| RING/FYVE/PHD zinc finger domain-containing protein [Arabidopsis thaliana]	727599617	XM_010474488.1	3617	0	PREDICTED: Camelina sativa protein strawberry notch (LOC104752370), mRNA	--	--	--	--	Q5F371	1127	2.4e-121	Protein strawberry notch homolog 1 OS=Gallus gallus GN=SBNO1 PE=2 SV=1	PF04851//PF00130//PF16866//PF01155//PF00628//PF01047	Type III restriction enzyme, res subunit//Phorbol esters/diacylglycerol binding domain (C1 domain)//PHD-finger//Hydrogenase/urease nickel incorporation, metallochaperone, hypA//PHD-finger//MarR family	GO:0006355//GO:0006464//GO:0009793//GO:0035556	regulation of transcription, DNA-templated//cellular protein modification process//embryo development ending in seed dormancy//intracellular signal transduction	GO:0016787//GO:0016151//GO:0008270//GO:0003700//GO:0005515//GO:0005524//GO:0003677	hydrolase activity//nickel cation binding//zinc ion binding//transcription factor activity, sequence-specific DNA binding//protein binding//ATP binding//DNA binding	GO:0005829//GO:0005634//GO:0005667	cytosol//nucleus//transcription factor complex	KOG1513	Nuclear helicase MOP-3/SNO (DEAD-box superfamily)	FALSE	0.1143	1	FALSE	-0.18169	1	FALSE	-3.2913	0.30806	FALSE	-0.25235	1
	3-6k.c7807/1/3972	0.406667	0.88	0.836667	0.75	2.24667	0.246667	0.683333	3904	565478422	XP_006296851.1	4929	0	hypothetical protein CARUB_v10012838mg [Capsella rubella]>gi|565478424|ref|XP_006296852.1| hypothetical protein CARUB_v10012838mg [Capsella rubella]>gi|482565560|gb|EOA29749.1| hypothetical protein CARUB_v10012838mg [Capsella rubella]>gi|482565561|gb|EOA29750.1| hypothetical protein CARUB_v10012838mg [Capsella rubella]	727413743	XM_010504101.1	2683	0	PREDICTED: Camelina sativa uncharacterized LOC104779699 (LOC104779699), mRNA	--	--	--	--	F4IXE7	4884	0	Increased DNA methylation 1 OS=Arabidopsis thaliana GN=IDM1 PE=1 SV=1	PF00628//PF00130//PF13673//PF13508//PF01429//PF00583	PHD-finger//Phorbol esters/diacylglycerol binding domain (C1 domain)//Acetyltransferase (GNAT) domain//Acetyltransferase (GNAT) domain//Methyl-CpG binding domain//Acetyltransferase (GNAT) family	GO:0035556//GO:0042967	intracellular signal transduction//acyl-carrier-protein biosynthetic process	GO:0003677//GO:0005515//GO:0008080	DNA binding//protein binding//N-acetyltransferase activity	GO:0005634	nucleus	--	--	FALSE	-0.51772	1	FALSE	0.49092	1	FALSE	0.85374	1	FALSE	1.3922	0.86626
	3-6k.c9042/1/4620	0.313333	0.123333	0.113333	0.61	0.743333	0.91	0	4499	565477067	XP_006296174.1	6219	0	hypothetical protein CARUB_v10025333mg [Capsella rubella]>gi|482564882|gb|EOA29072.1| hypothetical protein CARUB_v10025333mg [Capsella rubella]	727599080	XM_010474216.1	3704	0	PREDICTED: Camelina sativa CHD3-type chromatin-remodeling factor PICKLE-like (LOC104752150), mRNA	K11643	CHD4, MI2B	chromodomain-helicase-DNA-binding protein 4	http://www.genome.jp/dbget-bin/www_bget?ko:K11643	Q9S775	6173	0	CHD3-type chromatin-remodeling factor PICKLE OS=Arabidopsis thaliana GN=PKL PE=1 SV=1	PF12678//PF09111//PF16866//PF00628//PF12861//PF00176//PF08074//PF04851//PF00130	RING-H2 zinc finger//SLIDE//PHD-finger//PHD-finger//Anaphase-promoting complex subunit 11 RING-H2 finger//SNF2 family N-terminal domain//CHDCT2 (NUC038) domain//Type III restriction enzyme, res subunit//Phorbol esters/diacylglycerol binding domain (C1 domain)	GO:0006338//GO:0016567//GO:0035556//GO:0006355	chromatin remodeling//protein ubiquitination//intracellular signal transduction//regulation of transcription, DNA-templated	GO:0003677//GO:0016818//GO:0008270//GO:0004842//GO:0016787//GO:0003676//GO:0005524//GO:0005515	DNA binding//hydrolase activity, acting on acid anhydrides, in phosphorus-containing anhydrides//zinc ion binding//ubiquitin-protein transferase activity//hydrolase activity//nucleic acid binding//ATP binding//protein binding	GO:0005634//GO:0005680	nucleus//anaphase-promoting complex	KOG0383	Predicted helicase	FALSE	#NAME?	1	FALSE	#NAME?	0.35184	FALSE	1.0725	1	FALSE	2.8441	0.81028
bZIP	1-2k.c10369/1/1320	11.64	11.09	15.6333	19.19	84.78	79.9667	72.8167	1302	297802504	XP_002869136.1	638	2.6e-64	transcription factor GBF6 [Arabidopsis lyrata subsp. lyrata]>gi|297314972|gb|EFH45395.1| transcription factor GBF6 [Arabidopsis lyrata subsp. lyrata]	332656411	CP002687.1	803	0	Arabidopsis thaliana chromosome 4 sequence	--	--	--	--	P24068	187	7.2e-13	Ocs element-binding factor 1 OS=Zea mays GN=OBF1 PE=2 SV=2	PF03744//PF07716//PF00170//PF03131//PF04111//PF02183	6-carboxyhexanoate--CoA ligase//Basic region leucine zipper//bZIP transcription factor//bZIP Maf transcription factor//Autophagy protein Apg6//Homeobox associated leucine zipper	GO:0006355//GO:0006768//GO:0009102//GO:0006914	regulation of transcription, DNA-templated//biotin metabolic process//biotin biosynthetic process//autophagy	GO:0003700//GO:0043565//GO:0005524//GO:0003677//GO:0042410	transcription factor activity, sequence-specific DNA binding//sequence-specific DNA binding//ATP binding//DNA binding//6-carboxyhexanoate-CoA ligase activity	GO:0005667//GO:0005634	transcription factor complex//nucleus	--	--	FALSE	2.1525	1	FALSE	2.6719	0.23922	FALSE	0.89462	0.7206	UP	2.4926	9.8312e-06
	1-2k.c13617/1/1891	1.91333	3.74	3.02	10.8733	8.82	9.67333	17.7367	1397	15238046	NP_196565.1	1151	9.1e-124	transcription factor TGA4 [Arabidopsis thaliana]>gi|334187567|ref|NP_001190270.1| transcription factor TGA4 [Arabidopsis thaliana]>gi|44888356|sp|Q39162.2|TGA4_ARATH RecName: Full=Transcription factor TGA4; AltName: Full=Ocs element-binding factor 4; Short=OBF4; AltName: Full=bZIP transcription factor 57; Short=AtbZIP57>gi|7960722|emb|CAB92044.1| transcription factor OBF4 [Arabidopsis thaliana]>g…	334187566	NM_001203341.1	1040	0	Arabidopsis thaliana transcription factor TGA4 mRNA, complete cds	K14431	TGA	transcription factor TGA	http://www.genome.jp/dbget-bin/www_bget?ko:K14431	Q39162	1151	1.3e-124	Transcription factor TGA4 OS=Arabidopsis thaliana GN=TGA4 PE=1 SV=2	PF14144//PF07716//PF00170//PF06457//PF03131	Seed dormancy control//Basic region leucine zipper//bZIP transcription factor//Ectatomin//bZIP Maf transcription factor	GO:0009410//GO:0006857//GO:0006351//GO:0006355//GO:0009405//GO:0006811//GO:0009409//GO:0042742//GO:0030968	response to xenobiotic stimulus//oligopeptide transport//transcription, DNA-templated//regulation of transcription, DNA-templated//pathogenesis//ion transport//response to cold//defense response to bacterium//endoplasmic reticulum unfolded protein response	GO:0003700//GO:0005216//GO:0043565//GO:0005516//GO:0003677	transcription factor activity, sequence-specific DNA binding//ion channel activity//sequence-specific DNA binding//calmodulin binding//DNA binding	GO:0005576//GO:0005667//GO:0005634	extracellular region//transcription factor complex//nucleus	--	--	FALSE	2.5832	0.32235	UP	3.2276	0.025933	UP	2.5402	0.033282	FALSE	1.5777	0.6953
	1-2k.c13955/1/1626	0.99	6.7	2.44	4.3	0	4.97333	2.86	1618	565473311	XP_006294418.1	1665	2.6e-183	hypothetical protein CARUB_v10023434mg [Capsella rubella]>gi|482563126|gb|EOA27316.1| hypothetical protein CARUB_v10023434mg [Capsella rubella]	30690284	NM_130190.2	1118	0	Arabidopsis thaliana G-box binding factor 3 mRNA, complete cds	K09060	GBF	plant G-box-binding factor	http://www.genome.jp/dbget-bin/www_bget?ko:K09060	P42776	1635	1.1e-180	G-box-binding factor 3 OS=Arabidopsis thaliana GN=GBF3 PE=1 SV=2	PF02183//PF17078//PF04977//PF06391//PF06156//PF03131//PF04111//PF07716//PF00335//PF00170	Homeobox associated leucine zipper//SWI5-dependent HO expression protein 3//Septum formation initiator//CDK-activating kinase assembly factor MAT1//Protein of unknown function (DUF972)//bZIP Maf transcription factor//Autophagy protein Apg6//Basic region leucine zipper//Tetraspanin family//bZIP transcription factor	GO:0006914//GO:0007049//GO:0048309//GO:0051028//GO:0006260//GO:0006355	autophagy//cell cycle//endoplasmic reticulum inheritance//mRNA transport//DNA replication//regulation of transcription, DNA-templated	GO:0003677//GO:0003700//GO:0043565	DNA binding//transcription factor activity, sequence-specific DNA binding//sequence-specific DNA binding	GO:0005634//GO:0005667//GO:0016021	nucleus//transcription factor complex//integral component of membrane	--	--	FALSE	0.17586	1	FALSE	1.5487	0.73862	FALSE	2.1469	0.57591	FALSE	#NAME?	0.28249
	1-2k.c17041/1/2223.2	0	2.06	1.78667	2.96667	0.24	4.92333	3.71333	840	565472534	XP_006294069.1	632	8.3e-64	hypothetical protein CARUB_v10023063mg [Capsella rubella]>gi|565472536|ref|XP_006294070.1| hypothetical protein CARUB_v10023063mg [Capsella rubella]>gi|482562777|gb|EOA26967.1| hypothetical protein CARUB_v10023063mg [Capsella rubella]>gi|482562778|gb|EOA26968.1| hypothetical protein CARUB_v10023063mg [Capsella rubella]	727598262	XM_010473800.1	462	0	PREDICTED: Camelina sativa uncharacterized LOC104751777 (LOC104751777), mRNA	--	--	--	--	Q6S4P4	373	1.3e-34	Transcription factor RF2b OS=Oryza sativa subsp. japonica GN=RF2b PE=1 SV=2	PF05837//PF06005//PF03131//PF01166//PF00170//PF07716	Centromere protein H (CENP-H)//Protein of unknown function (DUF904)//bZIP Maf transcription factor//TSC-22/dip/bun family//bZIP transcription factor//Basic region leucine zipper	GO:0043093//GO:0000917//GO:0051382//GO:0006355	FtsZ-dependent cytokinesis//barrier septum assembly//kinetochore assembly//regulation of transcription, DNA-templated	GO:0003677//GO:0043565//GO:0003700	DNA binding//sequence-specific DNA binding//transcription factor activity, sequence-specific DNA binding	GO:0005737//GO:0005667//GO:0005634//GO:0000776	cytoplasm//transcription factor complex//nucleus//kinetochore	--	--	FALSE	0.99744	1	FALSE	Inf	0.075527	FALSE	Inf	0.12485	FALSE	-2.8542	1
	1-2k.c17867/1/1571	3.99667	5.75333	7.61	16.98	13.3633	21.4733	31.9067	1584	15238046	NP_196565.1	1250	3.4e-135	transcription factor TGA4 [Arabidopsis thaliana]>gi|334187567|ref|NP_001190270.1| transcription factor TGA4 [Arabidopsis thaliana]>gi|44888356|sp|Q39162.2|TGA4_ARATH RecName: Full=Transcription factor TGA4; AltName: Full=Ocs element-binding factor 4; Short=OBF4; AltName: Full=bZIP transcription factor 57; Short=AtbZIP57>gi|7960722|emb|CAB92044.1| transcription factor OBF4 [Arabidopsis thaliana]>g…	186521751	NM_121041.4	1114	0	Arabidopsis thaliana transcription factor TGA4 mRNA, complete cds	K14431	TGA	transcription factor TGA	http://www.genome.jp/dbget-bin/www_bget?ko:K14431	Q39162	1250	4.8e-136	Transcription factor TGA4 OS=Arabidopsis thaliana GN=TGA4 PE=1 SV=2	PF06457//PF14144	Ectatomin//Seed dormancy control	GO:0009409//GO:0042742//GO:0030968//GO:0006811//GO:0009405//GO:0006351//GO:0006355//GO:0006857//GO:0009410	response to cold//defense response to bacterium//endoplasmic reticulum unfolded protein response//ion transport//pathogenesis//transcription, DNA-templated//regulation of transcription, DNA-templated//oligopeptide transport//response to xenobiotic stimulus	GO:0003677//GO:0043565//GO:0005516//GO:0005216//GO:0003700	DNA binding//sequence-specific DNA binding//calmodulin binding//ion channel activity//transcription factor activity, sequence-specific DNA binding	GO:0005667//GO:0005634//GO:0005576	transcription factor complex//nucleus//extracellular region	--	--	FALSE	2.0895	0.8297	FALSE	3.0266	0.093207	UP	2.1225	0.0254	FALSE	0.82373	0.99234
	1-2k.c21746/1/1686	89.11	64.1767	81.2167	57.97	32.9633	26.5833	18.45	1662	685257032	XP_009117601.1	1248	6.1e-135	PREDICTED: ABSCISIC ACID-INSENSITIVE 5-like protein 6 [Brassica rapa]>gi|685257034|ref|XP_009117671.1| PREDICTED: ABSCISIC ACID-INSENSITIVE 5-like protein 6 [Brassica rapa]>gi|685257036|ref|XP_009117730.1| PREDICTED: ABSCISIC ACID-INSENSITIVE 5-like protein 6 [Brassica rapa]>gi|658384702|gb|AID60117.1| ABA-responsive element-binding protein [Brassica napus]>gi|658384746|gb|AID60160.1| ABA-respons…	145361364	NM_179159.3	966	0	Arabidopsis thaliana abscisic acid responsive elements-binding factor 3 mRNA, complete cds	K14432	ABF	ABA responsive element binding factor	http://www.genome.jp/dbget-bin/www_bget?ko:K14432	Q9M7Q3	1218	2.6e-132	ABSCISIC ACID-INSENSITIVE 5-like protein 6 OS=Arabidopsis thaliana GN=ABF3 PE=1 SV=1	PF00170//PF07716//PF03153//PF12137	bZIP transcription factor//Basic region leucine zipper//Transcription factor IIA, alpha/beta subunit//RNA polymerase recycling family C-terminal	GO:0006367//GO:0006355	transcription initiation from RNA polymerase II promoter//regulation of transcription, DNA-templated	GO:0043565//GO:0016817//GO:0003700	sequence-specific DNA binding//hydrolase activity, acting on acid anhydrides//transcription factor activity, sequence-specific DNA binding	GO:0005667//GO:0005672	transcription factor complex//transcription factor TFIIA complex	--	--	FALSE	-2.1988	0.25437	DOWN	-2.3302	0.012934	FALSE	-0.56225	0.83779	FALSE	-1.2713	0.06613
	1-2k.c26581/1/1996	2.88	4.24	4.49333	3.47667	9.44333	4.29667	1.78	1991	685298981	XP_009140260.1	1213	8.4e-131	PREDICTED: transcription factor RF2a-like [Brassica rapa]>gi|685298983|ref|XP_009140261.1| PREDICTED: transcription factor RF2a-like [Brassica rapa]	297824966	XM_002880320.1	1084	0	Arabidopsis lyrata subsp. lyrata hypothetical protein, mRNA	--	--	--	--	Q6S4P4	389	4.2e-36	Transcription factor RF2b OS=Oryza sativa subsp. japonica GN=RF2b PE=1 SV=2	PF03131//PF06005//PF06156//PF01166//PF07716//PF00170	bZIP Maf transcription factor//Protein of unknown function (DUF904)//Protein of unknown function (DUF972)//TSC-22/dip/bun family//Basic region leucine zipper//bZIP transcription factor	GO:0006355//GO:0006260//GO:0000917//GO:0043093	regulation of transcription, DNA-templated//DNA replication//barrier septum assembly//FtsZ-dependent cytokinesis	GO:0003700//GO:0043565//GO:0003677	transcription factor activity, sequence-specific DNA binding//sequence-specific DNA binding//DNA binding	GO:0005634//GO:0005737//GO:0005667	nucleus//cytoplasm//transcription factor complex	--	--	FALSE	-1.3715	1	FALSE	-0.78335	0.98105	FALSE	0.33782	1	FALSE	1.1344	0.81774
	1-2k.c2827/3/1837	26.4767	25.1233	19.9067	12.1133	5.92333	8.67667	7.92667	1835	297847296	XP_002891529.1	1472	7.2e-161	abscisic acid responsive element-binding factor 1 [Arabidopsis lyrata subsp. lyrata]>gi|297337371|gb|EFH67788.1| abscisic acid responsive element-binding factor 1 [Arabidopsis lyrata subsp. lyrata]	297847295	XM_002891483.1	960	0	Arabidopsis lyrata subsp. lyrata abscisic acid responsive element-binding factor 1 (ABF1), mRNA	K14432	ABF	ABA responsive element binding factor	http://www.genome.jp/dbget-bin/www_bget?ko:K14432	Q9M7Q5	1418	1.8e-155	ABSCISIC ACID-INSENSITIVE 5-like protein 4 OS=Arabidopsis thaliana GN=ABF1 PE=1 SV=1	PF00170//PF02532//PF07716//PF03131	bZIP transcription factor//Photosystem II reaction centre I protein (PSII 4.8 kDa protein)//Basic region leucine zipper//bZIP Maf transcription factor	GO:0015979//GO:0006355	photosynthesis//regulation of transcription, DNA-templated	GO:0003677//GO:0043565//GO:0003700	DNA binding//sequence-specific DNA binding//transcription factor activity, sequence-specific DNA binding	GO:0005667//GO:0005634//GO:0016020//GO:0009523//GO:0009539	transcription factor complex//nucleus//membrane//photosystem II//photosystem II reaction center	--	--	FALSE	-1.3584	1	FALSE	-1.7598	0.14771	FALSE	-1.055	0.3871	FALSE	-1.7034	0.070471
	1-2k.c2852/2/1697	0.453333	1.09	2.10333	2.48667	3.26667	2.92667	6.54	1690	727426808	XP_010462108.1	1675	1.9e-184	PREDICTED: transcription factor TGA1-like isoform X1 [Camelina sativa]	565433535	XM_006280602.1	926	0	Capsella rubella hypothetical protein (CARUB_v10026623mg) mRNA, complete cds	K14431	TGA	transcription factor TGA	http://www.genome.jp/dbget-bin/www_bget?ko:K14431	Q39237	1621	4.9e-179	Transcription factor TGA1 OS=Arabidopsis thaliana GN=TGA1 PE=1 SV=2	PF07716//PF00170//PF14144//PF07813	Basic region leucine zipper//bZIP transcription factor//Seed dormancy control//LTXXQ motif family protein	GO:0006355//GO:0006351	regulation of transcription, DNA-templated//transcription, DNA-templated	GO:0043565//GO:0003700	sequence-specific DNA binding//transcription factor activity, sequence-specific DNA binding	GO:0005667//GO:0042597	transcription factor complex//periplasmic space	--	--	FALSE	1.6514	1	UP	3.8771	0.017399	FALSE	2.5231	0.4181	FALSE	0.67122	1
	1-2k.c28738/1/1301	38.1133	35.9233	24.2967	14.3267	12.87	35.81	24.93	1302	727608664	XP_010477460.1	1644	5.8e-181	PREDICTED: transcription factor TGA3 [Camelina sativa]	297845219	XM_002890445.1	1058	0	Arabidopsis lyrata subsp. lyrata hypothetical protein, mRNA	K14431	TGA	transcription factor TGA	http://www.genome.jp/dbget-bin/www_bget?ko:K14431	Q39234	1638	4e-181	Transcription factor TGA3 OS=Arabidopsis thaliana GN=TGA3 PE=1 SV=1	PF14144//PF06424//PF07716//PF00170	Seed dormancy control//PRP1 splicing factor, N-terminal//Basic region leucine zipper//bZIP transcription factor	GO:0000398//GO:0006351//GO:0006355	mRNA splicing, via spliceosome//transcription, DNA-templated//regulation of transcription, DNA-templated	GO:0043565//GO:0003700	sequence-specific DNA binding//transcription factor activity, sequence-specific DNA binding	GO:0005667//GO:0005634	transcription factor complex//nucleus	--	--	FALSE	0.037394	1	FALSE	-0.57747	0.89033	FALSE	-1.3034	0.19822	FALSE	-0.86352	0.91331
	1-2k.c28779/1/1830	42.9733	24.0267	37.8767	21.95	10.9967	14.38	5.10333	1820	685257032	XP_009117601.1	1242	3.3e-134	PREDICTED: ABSCISIC ACID-INSENSITIVE 5-like protein 6 [Brassica rapa]>gi|685257034|ref|XP_009117671.1| PREDICTED: ABSCISIC ACID-INSENSITIVE 5-like protein 6 [Brassica rapa]>gi|685257036|ref|XP_009117730.1| PREDICTED: ABSCISIC ACID-INSENSITIVE 5-like protein 6 [Brassica rapa]>gi|658384702|gb|AID60117.1| ABA-responsive element-binding protein [Brassica napus]>gi|658384746|gb|AID60160.1| ABA-respons…	297802591	XM_002869134.1	1055	0	Arabidopsis lyrata subsp. lyrata hypothetical protein, mRNA	K14432	ABF	ABA responsive element binding factor	http://www.genome.jp/dbget-bin/www_bget?ko:K14432	Q9M7Q3	1214	8.2e-132	ABSCISIC ACID-INSENSITIVE 5-like protein 6 OS=Arabidopsis thaliana GN=ABF3 PE=1 SV=1	PF03131//PF12137//PF03153//PF07716//PF00170	bZIP Maf transcription factor//RNA polymerase recycling family C-terminal//Transcription factor IIA, alpha/beta subunit//Basic region leucine zipper//bZIP transcription factor	GO:0006355//GO:0006367	regulation of transcription, DNA-templated//transcription initiation from RNA polymerase II promoter	GO:0003700//GO:0043565//GO:0003677//GO:0016817	transcription factor activity, sequence-specific DNA binding//sequence-specific DNA binding//DNA binding//hydrolase activity, acting on acid anhydrides	GO:0005672//GO:0005634//GO:0005667	transcription factor TFIIA complex//nucleus//transcription factor complex	--	--	FALSE	-2.9422	0.057149	DOWN	-3.105	0.0012239	FALSE	-0.88456	0.49695	DOWN	-1.7473	0.012096
	1-2k.c30681/1/1586	1.69	1.71	1.95	7.87667	7.60333	5.38333	10.7733	1521	15238046	NP_196565.1	1845	3.3e-204	transcription factor TGA4 [Arabidopsis thaliana]>gi|334187567|ref|NP_001190270.1| transcription factor TGA4 [Arabidopsis thaliana]>gi|44888356|sp|Q39162.2|TGA4_ARATH RecName: Full=Transcription factor TGA4; AltName: Full=Ocs element-binding factor 4; Short=OBF4; AltName: Full=bZIP transcription factor 57; Short=AtbZIP57>gi|7960722|emb|CAB92044.1| transcription factor OBF4 [Arabidopsis thaliana]>g…	186521751	NM_121041.4	1116	0	Arabidopsis thaliana transcription factor TGA4 mRNA, complete cds	K14431	TGA	transcription factor TGA	http://www.genome.jp/dbget-bin/www_bget?ko:K14431	Q39162	1845	4.7e-205	Transcription factor TGA4 OS=Arabidopsis thaliana GN=TGA4 PE=1 SV=2	PF14144//PF00170//PF07716//PF06457	Seed dormancy control//bZIP transcription factor//Basic region leucine zipper//Ectatomin	GO:0006811//GO:0042742//GO:0009409//GO:0030968//GO:0006351//GO:0006355//GO:0009405//GO:0006857//GO:0009410	ion transport//defense response to bacterium//response to cold//endoplasmic reticulum unfolded protein response//transcription, DNA-templated//regulation of transcription, DNA-templated//pathogenesis//oligopeptide transport//response to xenobiotic stimulus	GO:0003677//GO:0043565//GO:0005516//GO:0005216//GO:0003700	DNA binding//sequence-specific DNA binding//calmodulin binding//ion channel activity//transcription factor activity, sequence-specific DNA binding	GO:0005667//GO:0005634//GO:0005576	transcription factor complex//nucleus//extracellular region	--	--	FALSE	2.4769	0.55699	FALSE	2.7021	0.058413	FALSE	2.295	0.10115	FALSE	2.002	0.41781
	1-2k.c32943/1/1612	36.5233	41.5933	28.5967	21.3467	15.4167	14.33	14.78	1610	727547420	XP_010446753.1	1348	1.5e-146	PREDICTED: G-box-binding factor 1-like isoform X1 [Camelina sativa]>gi|727547422|ref|XP_010446754.1| PREDICTED: G-box-binding factor 1-like isoform X2 [Camelina sativa]>gi|727547424|ref|XP_010446755.1| PREDICTED: G-box-binding factor 1-like isoform X1 [Camelina sativa]	145354367	NM_119837.4	964	0	Arabidopsis thaliana G-box binding factor 1 mRNA, complete cds	K09060	GBF	plant G-box-binding factor	http://www.genome.jp/dbget-bin/www_bget?ko:K09060	P42774	1322	2.2e-144	G-box-binding factor 1 OS=Arabidopsis thaliana GN=GBF1 PE=2 SV=2	PF02183//PF06005//PF01025//PF09726//PF04977//PF16331//PF06156//PF04728//PF10473//PF09026//PF03131//PF04111//PF07716//PF00170//PF10186	Homeobox associated leucine zipper//Protein of unknown function (DUF904)//GrpE//Transmembrane protein//Septum formation initiator//TolA binding protein trimerisation//Protein of unknown function (DUF972)//Lipoprotein leucine-zipper//Leucine-rich repeats of kinetochore protein Cenp-F/LEK1//Centromere protein B dimerisation domain//bZIP Maf transcription factor//Autophagy protein Apg6//Basic region…	GO:0007049//GO:0043093//GO:0006355//GO:0006457//GO:0070206//GO:0010508//GO:0000917//GO:0006914//GO:0006260	cell cycle//FtsZ-dependent cytokinesis//regulation of transcription, DNA-templated//protein folding//protein trimerization//positive regulation of autophagy//barrier septum assembly//autophagy//DNA replication	GO:0003677//GO:0045502//GO:0000774//GO:0043565//GO:0042803//GO:0003682//GO:0051087//GO:0003700//GO:0008134	DNA binding//dynein binding//adenyl-nucleotide exchange factor activity//sequence-specific DNA binding//protein homodimerization activity//chromatin binding//chaperone binding//transcription factor activity, sequence-specific DNA binding//transcription factor binding	GO:0030286//GO:0005737//GO:0019867//GO:0005634//GO:0005667//GO:0000775//GO:0016021//GO:0000785	dynein complex//cytoplasm//outer membrane//nucleus//transcription factor complex//chromosome, centromeric region//integral component of membrane//chromatin	--	--	FALSE	-0.97303	1	FALSE	-1.3319	0.37201	FALSE	-0.71586	0.72563	FALSE	-0.8497	0.74754
	1-2k.c33349/1/1257	17.66	11.3067	25.1367	25.05	153.107	62.75	67.0467	1292	15236153	NP_195185.1	629	2.8e-63	G-box binding factor 6 [Arabidopsis thaliana]>gi|3096928|emb|CAA18838.1| bZIP transcription factor ATB2 [Arabidopsis thaliana]>gi|7270409|emb|CAB80176.1| bZIP transcription factor ATB2 [Arabidopsis thaliana]>gi|17381046|gb|AAL36335.1| putative bZIP transcription factor ATB2 [Arabidopsis thaliana]>gi|20465863|gb|AAM20036.1| putative bZIP transcription factor ATB2 [Arabidopsis thaliana]>gi|33266099…	332656411	CP002687.1	834	0	Arabidopsis thaliana chromosome 4 sequence	--	--	--	--	P24068	187	7.1e-13	Ocs element-binding factor 1 OS=Zea mays GN=OBF1 PE=2 SV=2	PF03744//PF02183//PF07297//PF00170//PF07716//PF15898//PF06156//PF04111//PF03131	6-carboxyhexanoate--CoA ligase//Homeobox associated leucine zipper//Dolichol phosphate-mannose biosynthesis regulatory protein (DPM2)//bZIP transcription factor//Basic region leucine zipper//cGMP-dependent protein kinase interacting domain//Protein of unknown function (DUF972)//Autophagy protein Apg6//bZIP Maf transcription factor	GO:0006355//GO:0009744//GO:0006768//GO:0009102//GO:0009059//GO:0030968//GO:0006260//GO:0009410//GO:0080149//GO:0006914	regulation of transcription, DNA-templated//response to sucrose//biotin metabolic process//biotin biosynthetic process//macromolecule biosynthetic process//endoplasmic reticulum unfolded protein response//DNA replication//response to xenobiotic stimulus//sucrose induced translational repression//autophagy	GO:0043565//GO:0005524//GO:0003677//GO:0042410//GO:0019901//GO:0003700//GO:0046982	sequence-specific DNA binding//ATP binding//DNA binding//6-carboxyhexanoate-CoA ligase activity//protein kinase binding//transcription factor activity, sequence-specific DNA binding//protein heterodimerization activity	GO:0030176//GO:0005667//GO:0005634	integral component of endoplasmic reticulum membrane//transcription factor complex//nucleus	--	--	FALSE	1.3066	1	FALSE	1.8969	0.96265	FALSE	0.72492	1	UP	2.6853	9.8996e-07
	1-2k.c35813/1/1952	35.1167	37.3333	23.1	16.2033	10.12	10.26	10.76	1955	727522625	XP_010437315.1	1333	1e-144	PREDICTED: G-box-binding factor 1-like [Camelina sativa]	145354367	NM_119837.4	910	0	Arabidopsis thaliana G-box binding factor 1 mRNA, complete cds	K09060	GBF	plant G-box-binding factor	http://www.genome.jp/dbget-bin/www_bget?ko:K09060	P42774	1302	5.5e-142	G-box-binding factor 1 OS=Arabidopsis thaliana GN=GBF1 PE=2 SV=2	PF06156//PF04728//PF04977//PF16331//PF04111//PF03131//PF09026//PF10473//PF00170//PF07716//PF10186//PF02183//PF06005//PF01025//PF09726	Protein of unknown function (DUF972)//Lipoprotein leucine-zipper//Septum formation initiator//TolA binding protein trimerisation//Autophagy protein Apg6//bZIP Maf transcription factor//Centromere protein B dimerisation domain//Leucine-rich repeats of kinetochore protein Cenp-F/LEK1//bZIP transcription factor//Basic region leucine zipper//Vacuolar sorting 38 and autophagy-related subunit 14//Homeo…	GO:0006260//GO:0006914//GO:0000917//GO:0010508//GO:0070206//GO:0006355//GO:0006457//GO:0043093//GO:0007049	DNA replication//autophagy//barrier septum assembly//positive regulation of autophagy//protein trimerization//regulation of transcription, DNA-templated//protein folding//FtsZ-dependent cytokinesis//cell cycle	GO:0003700//GO:0008134//GO:0042803//GO:0051087//GO:0003682//GO:0043565//GO:0000774//GO:0045502//GO:0003677	transcription factor activity, sequence-specific DNA binding//transcription factor binding//protein homodimerization activity//chaperone binding//chromatin binding//sequence-specific DNA binding//adenyl-nucleotide exchange factor activity//dynein binding//DNA binding	GO:0000785//GO:0016021//GO:0000775//GO:0005667//GO:0005634//GO:0019867//GO:0005737//GO:0030286	chromatin//integral component of membrane//chromosome, centromeric region//transcription factor complex//nucleus//outer membrane//cytoplasm//dynein complex	--	--	FALSE	-1.1267	1	FALSE	-1.7561	0.13332	FALSE	-1.0745	0.33704	FALSE	-1.146	0.37347
	1-2k.c36577/1/2170	8.54	16.7633	30.79	42.4	22.84	13.4767	8.30667	2168	79606145	NP_973981.2	1338	2.9e-145	abscisic acid responsive elements-binding factor 2 [Arabidopsis thaliana]>gi|332193990|gb|AEE32111.1| abscisic acid responsive elements-binding factor 2 [Arabidopsis thaliana]	332189094	CP002684.1	911	0	Arabidopsis thaliana chromosome 1 sequence	K14432	ABF	ABA responsive element binding factor	http://www.genome.jp/dbget-bin/www_bget?ko:K14432	Q9M7Q4	1205	1.1e-130	ABSCISIC ACID-INSENSITIVE 5-like protein 5 OS=Arabidopsis thaliana GN=ABF2 PE=1 SV=1	PF04061//PF11593//PF07716//PF00170	ORMDL family//Mediator complex subunit 3 fungal//Basic region leucine zipper//bZIP transcription factor	GO:0006355//GO:0045893//GO:0006357//GO:0009738//GO:0009651//GO:0010255//GO:0009414	regulation of transcription, DNA-templated//positive regulation of transcription, DNA-templated//regulation of transcription from RNA polymerase II promoter//abscisic acid-activated signaling pathway//response to salt stress//glucose mediated signaling pathway//response to water deprivation	GO:0043565//GO:0001104//GO:0003677//GO:0003700//GO:0005515	sequence-specific DNA binding//RNA polymerase II transcription cofactor activity//DNA binding//transcription factor activity, sequence-specific DNA binding//protein binding	GO:0016592//GO:0005789//GO:0016021//GO:0005634//GO:0005667	mediator complex//endoplasmic reticulum membrane//integral component of membrane//nucleus//transcription factor complex	--	--	FALSE	-1.9329	0.53188	FALSE	-0.061209	1	UP	2.374	0.00070845	FALSE	-0.40618	1
	1-2k.c5954/4/1686	20.43	19.3	44.3933	24.0433	54.7633	8.47	9.14333	1679	727611989	XP_010479095.1	1297	1.3e-140	PREDICTED: ABSCISIC ACID-INSENSITIVE 5-like protein 5 [Camelina sativa]	565499829	XM_006307492.1	1023	0	Capsella rubella hypothetical protein (CARUB_v10009177mg) mRNA, partial cds	K14432	ABF	ABA responsive element binding factor	http://www.genome.jp/dbget-bin/www_bget?ko:K14432	Q9M7Q4	1268	4.2e-138	ABSCISIC ACID-INSENSITIVE 5-like protein 5 OS=Arabidopsis thaliana GN=ABF2 PE=1 SV=1	PF00170//PF07716//PF03131	bZIP transcription factor//Basic region leucine zipper//bZIP Maf transcription factor	GO:0006355	regulation of transcription, DNA-templated	GO:0043565//GO:0003700//GO:0003677	sequence-specific DNA binding//transcription factor activity, sequence-specific DNA binding//DNA binding	GO:0005634//GO:0005667	nucleus//transcription factor complex	--	--	FALSE	-2.3865	1	FALSE	-1.2839	0.60391	FALSE	0.40273	1	FALSE	0.39645	1
	1-2k.c6937/3/1817	47.9467	27.2367	17.82	9.00333	18.8733	5.88	4.91333	1817	565480118	XP_006297699.1	1384	1.1e-150	hypothetical protein CARUB_v10013729mg [Capsella rubella]>gi|482566408|gb|EOA30597.1| hypothetical protein CARUB_v10013729mg [Capsella rubella]	565480117	XM_006297637.1	1095	0	Capsella rubella hypothetical protein (CARUB_v10013729mg) mRNA, complete cds	K14432	ABF	ABA responsive element binding factor	http://www.genome.jp/dbget-bin/www_bget?ko:K14432	Q9M7Q2	1389	4.2e-152	ABSCISIC ACID-INSENSITIVE 5-like protein 7 OS=Arabidopsis thaliana GN=ABF4 PE=1 SV=1	PF17096//PF02601//PF02932//PF07716//PF00170	Altered inheritance of mitochondria protein 3//Exonuclease VII, large subunit//Neurotransmitter-gated ion-channel transmembrane region//Basic region leucine zipper//bZIP transcription factor	GO:0006355//GO:0051016//GO:0006811//GO:0006308	regulation of transcription, DNA-templated//barbed-end actin filament capping//ion transport//DNA catabolic process	GO:0003700//GO:0043565//GO:0008855	transcription factor activity, sequence-specific DNA binding//sequence-specific DNA binding//exodeoxyribonuclease VII activity	GO:0030479//GO:0009318//GO:0016020//GO:0005667	actin cortical patch//exodeoxyribonuclease VII complex//membrane//transcription factor complex	--	--	FALSE	-1.9502	1	DOWN	-3.4711	0.00094344	FALSE	-2.3379	0.057014	FALSE	0.16319	1
	1-2k.c7156/1/1994	0.976667	2.93	1.25667	2.26333	0	1.96667	1.91	1957	685298981	XP_009140260.1	1114	2.5e-119	PREDICTED: transcription factor RF2a-like [Brassica rapa]>gi|685298983|ref|XP_009140261.1| PREDICTED: transcription factor RF2a-like [Brassica rapa]	297824966	XM_002880320.1	1145	0	Arabidopsis lyrata subsp. lyrata hypothetical protein, mRNA	--	--	--	--	Q6S4P4	386	9.1e-36	Transcription factor RF2b OS=Oryza sativa subsp. japonica GN=RF2b PE=1 SV=2	PF07716//PF00170//PF06005//PF03131	Basic region leucine zipper//bZIP transcription factor//Protein of unknown function (DUF904)//bZIP Maf transcription factor	GO:0006355//GO:0043093//GO:0000917	regulation of transcription, DNA-templated//FtsZ-dependent cytokinesis//barrier septum assembly	GO:0043565//GO:0003700//GO:0003677	sequence-specific DNA binding//transcription factor activity, sequence-specific DNA binding//DNA binding	GO:0005667//GO:0005737//GO:0005634	transcription factor complex//cytoplasm//nucleus	--	--	FALSE	0.56554	1	FALSE	0.97906	0.9672	FALSE	1.1965	0.96724	FALSE	#NAME?	0.9021
	2-3k.c25944/1/1615	2.09667	3.25333	3.81333	7.46	8.06333	10.1133	13.6567	1618	727640654	XP_010491653.1	1171	5.1e-126	PREDICTED: transcription factor TGA4 [Camelina sativa]>gi|727640656|ref|XP_010491654.1| PREDICTED: transcription factor TGA4 [Camelina sativa]	186521751	NM_121041.4	1037	0	Arabidopsis thaliana transcription factor TGA4 mRNA, complete cds	K14431	TGA	transcription factor TGA	http://www.genome.jp/dbget-bin/www_bget?ko:K14431	Q39162	1166	2.7e-126	Transcription factor TGA4 OS=Arabidopsis thaliana GN=TGA4 PE=1 SV=2	PF06457//PF03131//PF07716//PF00170//PF14144	Ectatomin//bZIP Maf transcription factor//Basic region leucine zipper//bZIP transcription factor//Seed dormancy control	GO:0006811//GO:0006355//GO:0006351//GO:0009405	ion transport//regulation of transcription, DNA-templated//transcription, DNA-templated//pathogenesis	GO:0003677//GO:0005216//GO:0003700//GO:0043565	DNA binding//ion channel activity//transcription factor activity, sequence-specific DNA binding//sequence-specific DNA binding	GO:0005634//GO:0005667//GO:0005576	nucleus//transcription factor complex//extracellular region	--	--	FALSE	1.8547	0.89933	FALSE	2.7348	0.078705	FALSE	1.8755	0.21143	FALSE	1.0971	0.94137
ARF	1-2k.c10611/1/2254	0	1.40667	1.02667	0	0.453333	1.81667	0.343333	2240	565485589	XP_006300434.1	2987	0	hypothetical protein CARUB_v10022415mg [Capsella rubella]>gi|482569144|gb|EOA33332.1| hypothetical protein CARUB_v10022415mg [Capsella rubella]	297840604	XM_002888138.1	1854	0	Arabidopsis lyrata subsp. lyrata hypothetical protein, mRNA	K14486	K14486, ARF	auxin response factor	http://www.genome.jp/dbget-bin/www_bget?ko:K14486	Q8L7G0	2988	0	Auxin response factor 1 OS=Arabidopsis thaliana GN=ARF1 PE=1 SV=2	PF02309//PF02362//PF06507	AUX/IAA family//B3 DNA binding domain//Auxin response factor	GO:0006355//GO:0009725	regulation of transcription, DNA-templated//response to hormone	GO:0003677	DNA binding	GO:0005634	nucleus	--	--	FALSE	-1.4244	1	FALSE	Inf	0.64333	FALSE	NA	NA	FALSE	-1.1785	1
	1-2k.c21529/2/2179	1.40667	3.83667	1.06	0	1.26333	0.273333	0.5	2178	727461523	XP_010512556.1	2724	5.7e-306	PREDICTED: auxin response factor 18 [Camelina sativa]	30695490	NM_116048.2	1445	0	Arabidopsis thaliana auxin response factor 18 mRNA, complete cds	--	--	--	--	Q9C5W9	2678	1.7e-301	Auxin response factor 18 OS=Arabidopsis thaliana GN=ARF18 PE=2 SV=1	PF02309//PF06507//PF02362	AUX/IAA family//Auxin response factor//B3 DNA binding domain	GO:0006355//GO:0009725	regulation of transcription, DNA-templated//response to hormone	GO:0003677	DNA binding	GO:0005634	nucleus	--	--	FALSE	-1.2078	1	FALSE	-1.7009	0.78428	DOWN	#NAME?	0.016419	FALSE	0.32436	1
	1-2k.c22159/1/2259	8.21667	17.29	6.17667	6.87667	2.14667	4.66667	3.45	2267	30697610	NP_851244.1	2788	0	auxin response factor 2 [Arabidopsis thaliana]>gi|30697612|ref|NP_201006.2| auxin response factor 2 [Arabidopsis thaliana]>gi|42573768|ref|NP_974980.1| auxin response factor 2 [Arabidopsis thaliana]>gi|46395940|sp|Q94JM3.2|ARFB_ARATH RecName: Full=Auxin response factor 2; AltName: Full=ARF1-binding protein; Short=ARF1-BP; AltName: Full=Protein MEGAINTEGUMENTA>gi|10176918|dbj|BAB10162.1| auxin res…	727426016	XM_010459742.1	1751	0	PREDICTED: Camelina sativa auxin response factor 2-like (LOC104739391), transcript variant X2, mRNA	--	--	--	--	Q94JM3	2788	0	Auxin response factor 2 OS=Arabidopsis thaliana GN=ARF2 PE=1 SV=2	PF06507//PF02309	Auxin response factor//AUX/IAA family	GO:0006355//GO:0009725//GO:0010227//GO:0010047//GO:0045892//GO:0009737//GO:0048481//GO:0042744//GO:0008285//GO:0010150//GO:0009911	regulation of transcription, DNA-templated//response to hormone//floral organ abscission//fruit dehiscence//negative regulation of transcription, DNA-templated//response to abscisic acid//ovule development//hydrogen peroxide catabolic process//negative regulation of cell proliferation//leaf senescence//positive regulation of flower development	GO:0043565//GO:0003677//GO:0003700//GO:0046983	sequence-specific DNA binding//DNA binding//transcription factor activity, sequence-specific DNA binding//protein dimerization activity	GO:0005667//GO:0005634	transcription factor complex//nucleus	--	--	FALSE	-0.81794	1	FALSE	-1.2114	0.63188	FALSE	-0.21053	1	FALSE	-1.5202	0.89735
	1-2k.c22420/3/2269	21.72	16.73	12.22	9.02	5.33333	8.37333	4.52667	2262	727461523	XP_010512556.1	2724	5.9e-306	PREDICTED: auxin response factor 18 [Camelina sativa]	30695490	NM_116048.2	1471	0	Arabidopsis thaliana auxin response factor 18 mRNA, complete cds	--	--	--	--	Q9C5W9	2678	1.8e-301	Auxin response factor 18 OS=Arabidopsis thaliana GN=ARF18 PE=2 SV=1	PF02362//PF06507//PF02309	B3 DNA binding domain//Auxin response factor//AUX/IAA family	GO:0006355//GO:0009725	regulation of transcription, DNA-templated//response to hormone	GO:0003677	DNA binding	GO:0005634	nucleus	--	--	FALSE	-1.5322	1	DOWN	-2.3659	0.022987	FALSE	-1.191	0.26791	FALSE	-1.1513	0.55944
	1-2k.c26691/3/2152	12.5067	9.80667	8.10667	6.65333	3.98	6.45	5.26667	2151	15226178	NP_180942.1	2785	0	auxin response transcription factor 3 [Arabidopsis thaliana]>gi|46395605|sp|O23661.2|ARFC_ARATH RecName: Full=Auxin response factor 3; AltName: Full=Protein ETTIN>gi|12484199|gb|AAG53998.1|AF336917_1 auxin response transcription factor 3 [Arabidopsis thaliana]>gi|13430802|gb|AAK26023.1|AF360313_1 auxin response transcription factor 3 (ETTIN/ARF3) [Arabidopsis thaliana]>gi|3805770|gb|AAC69148.1| a…	727592721	XM_010471110.1	1685	0	PREDICTED: Camelina sativa auxin response factor 3-like (LOC104749467), mRNA	K14486	K14486, ARF	auxin response factor	http://www.genome.jp/dbget-bin/www_bget?ko:K14486	O23661	2785	0	Auxin response factor 3 OS=Arabidopsis thaliana GN=ARF3 PE=1 SV=2	PF06507//PF02362	Auxin response factor//B3 DNA binding domain	GO:0009887//GO:0009616//GO:0048439//GO:0048519//GO:0010051//GO:0048438//GO:0006355//GO:0010158//GO:0009725//GO:0010050//GO:0009733//GO:0009855//GO:0009850	organ morphogenesis//virus induced gene silencing//flower morphogenesis//negative regulation of biological process//xylem and phloem pattern formation//floral whorl development//regulation of transcription, DNA-templated//abaxial cell fate specification//response to hormone//vegetative phase change//response to auxin//determination of bilateral symmetry//auxin metabolic process	GO:0003677//GO:0003700	DNA binding//transcription factor activity, sequence-specific DNA binding	GO:0005667//GO:0005634	transcription factor complex//nucleus	--	--	FALSE	-0.70233	1	FALSE	-1.3418	0.46218	FALSE	-0.85635	0.6863	FALSE	-0.98568	0.91915
	1-2k.c34482/2/2007	16.0667	10.1467	9.16	7.82333	3.84333	4.59333	3.87	1998	565476797	XP_006296039.1	2794	0	hypothetical protein CARUB_v10025185mg [Capsella rubella]>gi|482564747|gb|EOA28937.1| hypothetical protein CARUB_v10025185mg [Capsella rubella]	145360586	NM_128946.3	1577	0	Arabidopsis thaliana auxin response transcription factor 3 mRNA, complete cds	K14486	K14486, ARF	auxin response factor	http://www.genome.jp/dbget-bin/www_bget?ko:K14486	O23661	2791	0	Auxin response factor 3 OS=Arabidopsis thaliana GN=ARF3 PE=1 SV=2	PF02362//PF06507	B3 DNA binding domain//Auxin response factor	GO:0009725//GO:0006355	response to hormone//regulation of transcription, DNA-templated	GO:0003677	DNA binding	GO:0005634	nucleus	--	--	FALSE	-1.3327	1	FALSE	-2.1601	0.084687	FALSE	-0.99276	0.5331	FALSE	-1.2203	0.7146
	2-3k.c14559/1/6404	0	0	0	10.5233	0	3.75667	0.353333	3227	30697610	NP_851244.1	4085	0	auxin response factor 2 [Arabidopsis thaliana]>gi|30697612|ref|NP_201006.2| auxin response factor 2 [Arabidopsis thaliana]>gi|42573768|ref|NP_974980.1| auxin response factor 2 [Arabidopsis thaliana]>gi|46395940|sp|Q94JM3.2|ARFB_ARATH RecName: Full=Auxin response factor 2; AltName: Full=ARF1-binding protein; Short=ARF1-BP; AltName: Full=Protein MEGAINTEGUMENTA>gi|10176918|dbj|BAB10162.1| auxin res…	334188558	NM_180913.3	2423	0	Arabidopsis thaliana auxin response factor 2 mRNA, complete cds	--	--	--	--	Q94JM3	4085	0	Auxin response factor 2 OS=Arabidopsis thaliana GN=ARF2 PE=1 SV=2	PF06507//PF02362//PF02309	Auxin response factor//B3 DNA binding domain//AUX/IAA family	GO:0042744//GO:0008285//GO:0010150//GO:0009911//GO:0010047//GO:0045892//GO:0009737//GO:0048481//GO:0006355//GO:0009725//GO:0010227	hydrogen peroxide catabolic process//negative regulation of cell proliferation//leaf senescence//positive regulation of flower development//fruit dehiscence//negative regulation of transcription, DNA-templated//response to abscisic acid//ovule development//regulation of transcription, DNA-templated//response to hormone//floral organ abscission	GO:0046983//GO:0003700//GO:0003677//GO:0043565	protein dimerization activity//transcription factor activity, sequence-specific DNA binding//DNA binding//sequence-specific DNA binding	GO:0005667//GO:0005634	transcription factor complex//nucleus	--	--	FALSE	Inf	1	FALSE	Inf	0.58929	UP	Inf	0.00037356	FALSE	NA	NA
	2-3k.c2034/3/2964	10.1	6.32667	4.11	3.92667	3.2	4.39	3.56333	2959	567125696	XP_006391521.1	3736	0	hypothetical protein EUTSA_v10018139mg [Eutrema salsugineum]>gi|312281961|dbj|BAJ33846.1| unnamed protein product [Thellungiella halophila]>gi|557087955|gb|ESQ28807.1| hypothetical protein EUTSA_v10018139mg [Eutrema salsugineum]	567125695	XM_006391459.1	1756	0	Eutrema salsugineum hypothetical protein (EUTSA_v10018139mg) mRNA, complete cds	--	--	--	--	Q9FGV1	3206	0	Auxin response factor 8 OS=Arabidopsis thaliana GN=ARF8 PE=2 SV=2	PF13580//PF02309//PF06507//PF02362//PF09293	SIS domain//AUX/IAA family//Auxin response factor//B3 DNA binding domain//T4 RNase H, C terminal	GO:0009725//GO:0006355//GO:0005975//GO:0009734	response to hormone//regulation of transcription, DNA-templated//carbohydrate metabolic process//auxin-activated signaling pathway	GO:0030246//GO:0003824//GO:0046983//GO:0003677	carbohydrate binding//catalytic activity//protein dimerization activity//DNA binding	GO:0005634	nucleus	--	--	FALSE	-0.26974	1	FALSE	-1.5876	0.31142	FALSE	-1.3094	0.26541	FALSE	-0.30874	1
	2-3k.c23854/1/5066	12.8033	11.59	12.24	10.9367	3.88667	7.29667	5.25333	2204	62319903	BAD93968.1	2750	5.5e-309	ARF1-binding protein [Arabidopsis thaliana]	565431461	XM_006279927.1	1668	0	Capsella rubella hypothetical protein (CARUB_v10025860mg) mRNA, complete cds	--	--	--	--	Q94JM3	2750	7.7e-310	Auxin response factor 2 OS=Arabidopsis thaliana GN=ARF2 PE=1 SV=2	PF02362//PF06507	B3 DNA binding domain//Auxin response factor	GO:0006355//GO:0009725	regulation of transcription, DNA-templated//response to hormone	GO:0003677	DNA binding	GO:0005634	nucleus	--	--	FALSE	-1.2923	1	FALSE	-1.3022	0.46161	FALSE	-0.11093	1	FALSE	-1.6124	0.19571
	2-3k.c2421/2/3356	4.14	5.17	4.69	2.20667	1.25	0.17	0.37	3356	30697610	NP_851244.1	3936	0	auxin response factor 2 [Arabidopsis thaliana]>gi|30697612|ref|NP_201006.2| auxin response factor 2 [Arabidopsis thaliana]>gi|42573768|ref|NP_974980.1| auxin response factor 2 [Arabidopsis thaliana]>gi|46395940|sp|Q94JM3.2|ARFB_ARATH RecName: Full=Auxin response factor 2; AltName: Full=ARF1-binding protein; Short=ARF1-BP; AltName: Full=Protein MEGAINTEGUMENTA>gi|10176918|dbj|BAB10162.1| auxin res…	334188558	NM_180913.3	2512	0	Arabidopsis thaliana auxin response factor 2 mRNA, complete cds	--	--	--	--	Q94JM3	3936	0	Auxin response factor 2 OS=Arabidopsis thaliana GN=ARF2 PE=1 SV=2	PF02362//PF06507//PF02309	B3 DNA binding domain//Auxin response factor//AUX/IAA family	GO:0009911//GO:0008285//GO:0010150//GO:0042744//GO:0009737//GO:0048481//GO:0045892//GO:0010047//GO:0010227//GO:0009725//GO:0006355	positive regulation of flower development//negative regulation of cell proliferation//leaf senescence//hydrogen peroxide catabolic process//response to abscisic acid//ovule development//negative regulation of transcription, DNA-templated//fruit dehiscence//floral organ abscission//response to hormone//regulation of transcription, DNA-templated	GO:0046983//GO:0003700//GO:0003677//GO:0043565	protein dimerization activity//transcription factor activity, sequence-specific DNA binding//DNA binding//sequence-specific DNA binding	GO:0005634//GO:0005667	nucleus//transcription factor complex	--	--	FALSE	-3.6339	0.083494	FALSE	-3.3641	0.32546	FALSE	-0.76196	1	FALSE	-1.8434	0.24501
	2-3k.c24342/1/3195	2.12	3.04667	0	0.106667	3.15667	0	0.103333	3204	727556666	XP_010450468.1	3927	0	PREDICTED: auxin response factor 8 isoform X2 [Camelina sativa]	727556665	XM_010452166.1	2357	0	PREDICTED: Camelina sativa auxin response factor 8 (LOC104732603), transcript variant X2, mRNA	--	--	--	--	Q9FGV1	3795	0	Auxin response factor 8 OS=Arabidopsis thaliana GN=ARF8 PE=2 SV=2	PF06624//PF13580//PF02309//PF06507//PF02362	Ribosome associated membrane protein RAMP4//SIS domain//AUX/IAA family//Auxin response factor//B3 DNA binding domain	GO:0005975//GO:0006355//GO:0009725	carbohydrate metabolic process//regulation of transcription, DNA-templated//response to hormone	GO:0003677//GO:0030246	DNA binding//carbohydrate binding	GO:0005783//GO:0005634	endoplasmic reticulum//nucleus	--	--	FALSE	Inf	1	FALSE	-4.0258	0.57391	FALSE	-4.0367	0.6208	UP	Inf	0.024943
	2-3k.c2715/5/3066	6.36333	5.63	3.78	2.98333	1.91	3.28667	3.13	3017	567125696	XP_006391521.1	3726	0	hypothetical protein EUTSA_v10018139mg [Eutrema salsugineum]>gi|312281961|dbj|BAJ33846.1| unnamed protein product [Thellungiella halophila]>gi|557087955|gb|ESQ28807.1| hypothetical protein EUTSA_v10018139mg [Eutrema salsugineum]	567125695	XM_006391459.1	1739	0	Eutrema salsugineum hypothetical protein (EUTSA_v10018139mg) mRNA, complete cds	--	--	--	--	Q9FGV1	3197	0	Auxin response factor 8 OS=Arabidopsis thaliana GN=ARF8 PE=2 SV=2	PF02309//PF06507//PF02362//PF13580	AUX/IAA family//Auxin response factor//B3 DNA binding domain//SIS domain	GO:0006355//GO:0005975//GO:0009725//GO:0009734	regulation of transcription, DNA-templated//carbohydrate metabolic process//response to hormone//auxin-activated signaling pathway	GO:0030246//GO:0046983//GO:0003677	carbohydrate binding//protein dimerization activity//DNA binding	GO:0005634	nucleus	--	--	FALSE	-0.35195	1	FALSE	-1.1128	0.65743	FALSE	-1.0349	0.59698	FALSE	-0.94075	1
	2-3k.c27738/1/3125	3.43	15.8333	1.5	2.56333	1.52333	0	4.45333	3186	30697610	NP_851244.1	4085	0	auxin response factor 2 [Arabidopsis thaliana]>gi|30697612|ref|NP_201006.2| auxin response factor 2 [Arabidopsis thaliana]>gi|42573768|ref|NP_974980.1| auxin response factor 2 [Arabidopsis thaliana]>gi|46395940|sp|Q94JM3.2|ARFB_ARATH RecName: Full=Auxin response factor 2; AltName: Full=ARF1-binding protein; Short=ARF1-BP; AltName: Full=Protein MEGAINTEGUMENTA>gi|10176918|dbj|BAB10162.1| auxin res…	334188559	NM_125593.4	2475	0	Arabidopsis thaliana auxin response factor 2 mRNA, complete cds	--	--	--	--	Q94JM3	4085	0	Auxin response factor 2 OS=Arabidopsis thaliana GN=ARF2 PE=1 SV=2	PF02309//PF02362//PF06507	AUX/IAA family//B3 DNA binding domain//Auxin response factor	GO:0045892//GO:0048481//GO:0009737//GO:0010047//GO:0010227//GO:0009725//GO:0006355//GO:0009911//GO:0042744//GO:0008285//GO:0010150	negative regulation of transcription, DNA-templated//ovule development//response to abscisic acid//fruit dehiscence//floral organ abscission//response to hormone//regulation of transcription, DNA-templated//positive regulation of flower development//hydrogen peroxide catabolic process//negative regulation of cell proliferation//leaf senescence	GO:0003677//GO:0043565//GO:0046983//GO:0003700	DNA binding//sequence-specific DNA binding//protein dimerization activity//transcription factor activity, sequence-specific DNA binding	GO:0005634//GO:0005667	nucleus//transcription factor complex	--	--	FALSE	1.5474	1	FALSE	0.34596	1	FALSE	-0.41141	1	FALSE	-0.012613	1
	2-3k.c8768/3/3244	1.56333	1.42	0.16	0.793333	0.68	0	0	3247	727556666	XP_010450468.1	3927	0	PREDICTED: auxin response factor 8 isoform X2 [Camelina sativa]	727556665	XM_010452166.1	2334	0	PREDICTED: Camelina sativa auxin response factor 8 (LOC104732603), transcript variant X2, mRNA	--	--	--	--	Q9FGV1	3795	0	Auxin response factor 8 OS=Arabidopsis thaliana GN=ARF8 PE=2 SV=2	PF13580//PF06624//PF02362//PF06507//PF02309	SIS domain//Ribosome associated membrane protein RAMP4//B3 DNA binding domain//Auxin response factor//AUX/IAA family	GO:0005975//GO:0006355//GO:0009725	carbohydrate metabolic process//regulation of transcription, DNA-templated//response to hormone	GO:0003677//GO:0030246	DNA binding//carbohydrate binding	GO:0005783//GO:0005634	endoplasmic reticulum//nucleus	--	--	FALSE	#NAME?	1	DOWN	#NAME?	0.0093503	FALSE	-0.80099	1	FALSE	2.1279	1
	3-6k.c19939/1/4041.1	1.92667	1.35667	3.95333	2.09	0.00333333	1.82667	1.76333	3568	297812257	XP_002874012.1	2157	5.2e-240	hypothetical protein ARALYDRAFT_488981 [Arabidopsis lyrata subsp. lyrata]>gi|297319849|gb|EFH50271.1| hypothetical protein ARALYDRAFT_488981 [Arabidopsis lyrata subsp. lyrata]	297812256	XM_002873966.1	2927	0	Arabidopsis lyrata subsp. lyrata hypothetical protein, mRNA	K14486	K14486, ARF	auxin response factor	http://www.genome.jp/dbget-bin/www_bget?ko:K14486	P93022	2152	2.8e-240	Auxin response factor 7 OS=Arabidopsis thaliana GN=ARF7 PE=1 SV=2	PF02309//PF02362//PF06507//PF00564	AUX/IAA family//B3 DNA binding domain//Auxin response factor//PB1 domain	GO:0009734//GO:0006355//GO:0009725	auxin-activated signaling pathway//regulation of transcription, DNA-templated//response to hormone	GO:0003677//GO:0046983//GO:0005515	DNA binding//protein dimerization activity//protein binding	GO:0005634	nucleus	--	--	FALSE	-1.2314	1	FALSE	-0.2092	1	FALSE	0.12919	1	DOWN	-9.6674	1.2947e-09
	3-6k.c21696/1/2742	12.85	6.35	6.84333	4.60667	6.59	4.08667	3.08333	2717	15233647	NP_194129.1	2851	0	auxin response factor 9 [Arabidopsis thaliana]>gi|46576670|sp|Q9XED8.1|ARFI_ARATH RecName: Full=Auxin response factor 9>gi|4580575|gb|AAD24427.1|AF082176_1 auxin response factor 9 [Arabidopsis thaliana]>gi|12744967|gb|AAK06863.1|AF344312_1 auxin response factor 9 [Arabidopsis thaliana]>gi|4972102|emb|CAB43898.1| auxin response factor 9 (ARF9) [Arabidopsis thaliana]>gi|7269247|emb|CAB81316.1| auxi…	727514985	XM_010435529.1	1536	0	PREDICTED: Camelina sativa auxin response factor 9-like (LOC104717887), transcript variant X1, mRNA	--	--	--	--	Q9XED8	2851	0	Auxin response factor 9 OS=Arabidopsis thaliana GN=ARF9 PE=1 SV=1	PF06507//PF02362//PF02309	Auxin response factor//B3 DNA binding domain//AUX/IAA family	GO:0009725//GO:0006355	response to hormone//regulation of transcription, DNA-templated	GO:0005515//GO:0003700//GO:0003677	protein binding//transcription factor activity, sequence-specific DNA binding//DNA binding	GO:0005634//GO:0005667	nucleus//transcription factor complex	--	--	FALSE	-1.2565	1	DOWN	-2.2209	0.043849	FALSE	-1.3991	0.18019	FALSE	0.02294	1
	3-6k.c5946/1/3386	5.93	6.07667	4.05333	2.28667	1.48	0.493333	0.946667	3373	30697610	NP_851244.1	4085	0	auxin response factor 2 [Arabidopsis thaliana]>gi|30697612|ref|NP_201006.2| auxin response factor 2 [Arabidopsis thaliana]>gi|42573768|ref|NP_974980.1| auxin response factor 2 [Arabidopsis thaliana]>gi|46395940|sp|Q94JM3.2|ARFB_ARATH RecName: Full=Auxin response factor 2; AltName: Full=ARF1-binding protein; Short=ARF1-BP; AltName: Full=Protein MEGAINTEGUMENTA>gi|10176918|dbj|BAB10162.1| auxin res…	334188558	NM_180913.3	2476	0	Arabidopsis thaliana auxin response factor 2 mRNA, complete cds	--	--	--	--	Q94JM3	4085	0	Auxin response factor 2 OS=Arabidopsis thaliana GN=ARF2 PE=1 SV=2	PF06507//PF02362//PF02309	Auxin response factor//B3 DNA binding domain//AUX/IAA family	GO:0042744//GO:0010150//GO:0008285//GO:0009911//GO:0045892//GO:0048481//GO:0009737//GO:0010047//GO:0006355//GO:0010227//GO:0009725	hydrogen peroxide catabolic process//leaf senescence//negative regulation of cell proliferation//positive regulation of flower development//negative regulation of transcription, DNA-templated//ovule development//response to abscisic acid//fruit dehiscence//regulation of transcription, DNA-templated//floral organ abscission//response to hormone	GO:0046983//GO:0003700//GO:0003677//GO:0043565	protein dimerization activity//transcription factor activity, sequence-specific DNA binding//DNA binding//sequence-specific DNA binding	GO:0005634//GO:0005667	nucleus//transcription factor complex	--	--	FALSE	-2.2149	1	DOWN	-2.8191	0.019713	FALSE	-1.2706	0.39351	FALSE	-1.3748	1
	3-6k.c7666/6/3380	9.90333	13.18	15.4533	0	8.75	5.87333	6.25	3381	30697610	NP_851244.1	4085	0	auxin response factor 2 [Arabidopsis thaliana]>gi|30697612|ref|NP_201006.2| auxin response factor 2 [Arabidopsis thaliana]>gi|42573768|ref|NP_974980.1| auxin response factor 2 [Arabidopsis thaliana]>gi|46395940|sp|Q94JM3.2|ARFB_ARATH RecName: Full=Auxin response factor 2; AltName: Full=ARF1-binding protein; Short=ARF1-BP; AltName: Full=Protein MEGAINTEGUMENTA>gi|10176918|dbj|BAB10162.1| auxin res…	334188559	NM_125593.4	2476	0	Arabidopsis thaliana auxin response factor 2 mRNA, complete cds	--	--	--	--	Q94JM3	4085	0	Auxin response factor 2 OS=Arabidopsis thaliana GN=ARF2 PE=1 SV=2	PF02309//PF06507//PF02362	AUX/IAA family//Auxin response factor//B3 DNA binding domain	GO:0010227//GO:0009725//GO:0006355//GO:0045892//GO:0009737//GO:0048481//GO:0010047//GO:0009911//GO:0042744//GO:0010150//GO:0008285	floral organ abscission//response to hormone//regulation of transcription, DNA-templated//negative regulation of transcription, DNA-templated//response to abscisic acid//ovule development//fruit dehiscence//positive regulation of flower development//hydrogen peroxide catabolic process//leaf senescence//negative regulation of cell proliferation	GO:0043565//GO:0003677//GO:0003700//GO:0046983	sequence-specific DNA binding//DNA binding//transcription factor activity, sequence-specific DNA binding//protein dimerization activity	GO:0005634//GO:0005667	nucleus//transcription factor complex	--	--	FALSE	-1.4011	1	FALSE	-0.84793	1	DOWN	#NAME?	0.035144	FALSE	-0.74053	1
	3-6k.c9010/1/4116	0.0366667	0.763333	1.24667	3.19667	0.0433333	2.96333	2.97	4065	297812257	XP_002874012.1	2351	1.9e-262	hypothetical protein ARALYDRAFT_488981 [Arabidopsis lyrata subsp. lyrata]>gi|297319849|gb|EFH50271.1| hypothetical protein ARALYDRAFT_488981 [Arabidopsis lyrata subsp. lyrata]	145361993	NM_180716.2	3072	0	Arabidopsis thaliana auxin-regulated transcriptional activator NPH4 mRNA, complete cds	K14486	K14486, ARF	auxin response factor	http://www.genome.jp/dbget-bin/www_bget?ko:K14486	P93022	2347	7.7e-263	Auxin response factor 7 OS=Arabidopsis thaliana GN=ARF7 PE=1 SV=2	PF02362//PF06507//PF00564//PF02309//PF01033//PF06687	B3 DNA binding domain//Auxin response factor//PB1 domain//AUX/IAA family//Somatomedin B domain//SUR7/PalI family	GO:0007165//GO:0009734//GO:0009725//GO:0006355//GO:0006955	signal transduction//auxin-activated signaling pathway//response to hormone//regulation of transcription, DNA-templated//immune response	GO:0046983//GO:0003677//GO:0005515//GO:0005044//GO:0030247	protein dimerization activity//DNA binding//protein binding//scavenger receptor activity//polysaccharide binding	GO:0005634//GO:0005886	nucleus//plasma membrane	--	--	FALSE	1.2086	1	UP	6.5619	0.021634	UP	6.6336	0.020752	FALSE	-4.9923	1
NAC	1-2k.c18863/1/1464	8.19333	89.0967	73.0067	126.707	20.6733	56.8667	47.3333	1398	725539558	AIY30328.1	1457	3e-159	NAC026 [Olimarabidopsis pumila]	725539557	KM457621.1	1210	0	Olimarabidopsis pumila NAC026 (NAC026) mRNA, complete cds	--	--	--	--	Q93VY3	1418	1.4e-155	NAC domain-containing protein 72 OS=Arabidopsis thaliana GN=NAC072 PE=2 SV=1	PF02365	No apical meristem (NAM) protein	GO:0006355	regulation of transcription, DNA-templated	GO:0003677	DNA binding	--	--	--	--	FALSE	-0.68345	1	FALSE	2.5633	0.090201	UP	3.9932	0.036089	FALSE	-1.8654	1
	1-2k.c19056/1/1759	0	1.52667	5.43	7.67	0	5.71333	7.61333	1758	727490443	XP_010421284.1	1990	5.9e-221	PREDICTED: NAC domain-containing protein 74-like isoform X1 [Camelina sativa]>gi|727490447|ref|XP_010421286.1| PREDICTED: NAC domain-containing protein 74-like isoform X3 [Camelina sativa]	727645616	XM_010495407.1	1036	0	PREDICTED: Camelina sativa NAC domain-containing protein 74 (LOC104770930), mRNA	--	--	--	--	Q9SCK6	1289	1.6e-140	NAC domain-containing protein 62 OS=Arabidopsis thaliana GN=NAC062 PE=1 SV=1	PF02365//PF11654	No apical meristem (NAM) protein//Protein of unknown function (DUF2665)	GO:0006355//GO:0009306	regulation of transcription, DNA-templated//protein secretion	GO:0003677	DNA binding	--	--	--	--	FALSE	0.45509	1	UP	Inf	0.0024832	UP	Inf	0.0015629	FALSE	#NAME?	0.70805
	1-2k.c20761/1/1861	0	0	1.05333	5.23667	0	3.57	1.02	1859	297806417	XP_002871092.1	2487	1.5e-278	hypothetical protein ARALYDRAFT_908325 [Arabidopsis lyrata subsp. lyrata]>gi|297316929|gb|EFH47351.1| hypothetical protein ARALYDRAFT_908325 [Arabidopsis lyrata subsp. lyrata]	297806416	XM_002871046.1	1371	0	Arabidopsis lyrata subsp. lyrata hypothetical protein, mRNA	--	--	--	--	Q84K00	2455	1.1e-275	NAC domain-containing protein 78 OS=Arabidopsis thaliana GN=NAC078 PE=2 SV=2	PF02365	No apical meristem (NAM) protein	GO:0006355	regulation of transcription, DNA-templated	GO:0003677	DNA binding	--	--	--	--	FALSE	-0.15512	1	FALSE	Inf	0.1751	UP	Inf	0.0059944	FALSE	#NAME?	0.91249
	1-2k.c22453/1/1573	21.7067	6.67333	5.55667	1.54667	4.36333	5.51333	3.76	1568	297830132	XP_002882948.1	1505	9.1e-165	ATNAC2 [Arabidopsis lyrata subsp. lyrata]>gi|297328788|gb|EFH59207.1| ATNAC2 [Arabidopsis lyrata subsp. lyrata]	145338550	NM_112419.3	961	0	Arabidopsis thaliana NAC domain containing protein 2 mRNA, complete cds	--	--	--	--	Q9LD44	1502	2.9e-165	NAC transcription factor 56 OS=Arabidopsis thaliana GN=NAC056 PE=2 SV=1	PF02365//PF01356	No apical meristem (NAM) protein//Alpha amylase inhibitor	GO:0006355	regulation of transcription, DNA-templated	GO:0015066//GO:0003677	alpha-amylase inhibitor activity//DNA binding	--	--	--	--	FALSE	-0.67481	1	DOWN	-2.7089	0.011681	DOWN	-3.6935	3.1726e-05	FALSE	-0.2622	1
	1-2k.c23212/1/1264	198.563	300.853	419.487	445.08	371.987	245.837	262.83	1263	725539558	AIY30328.1	1514	6.7e-166	NAC026 [Olimarabidopsis pumila]	725539557	KM457621.1	964	0	Olimarabidopsis pumila NAC026 (NAC026) mRNA, complete cds	--	--	--	--	Q93VY3	1474	4.1e-162	NAC domain-containing protein 72 OS=Arabidopsis thaliana GN=NAC072 PE=2 SV=1	PF02365	No apical meristem (NAM) protein	GO:0006355	regulation of transcription, DNA-templated	GO:0003677	DNA binding	--	--	--	--	FALSE	-0.68903	1	FALSE	0.42002	0.98841	FALSE	1.2495	0.094998	FALSE	-0.14252	1
	1-2k.c24095/1/1742	4.34	11.8033	12.8467	17.1667	8.62667	25.4233	36.2067	1742	565499156	XP_006307217.1	1970	1.2e-218	hypothetical protein CARUB_v10008817mg [Capsella rubella]>gi|482575928|gb|EOA40115.1| hypothetical protein CARUB_v10008817mg [Capsella rubella]	565499155	XM_006307155.1	1129	0	Capsella rubella hypothetical protein (CARUB_v10008817mg) mRNA, complete cds	--	--	--	--	F4IED2	1850	1.4e-205	NAC domain-containing protein 13 OS=Arabidopsis thaliana GN=NAC13 PE=1 SV=1	PF02365	No apical meristem (NAM) protein	GO:0006355	regulation of transcription, DNA-templated	GO:0003677	DNA binding	--	--	--	--	FALSE	1.5296	1	FALSE	3.2152	0.27934	UP	2.1056	0.025272	FALSE	-0.56921	1
	1-2k.c26164/1/1017	406.26	227.18	266.527	190.097	132.887	91.9067	55.4833	1016	297838713	XP_002887238.1	1298	6e-141	NAC domain protein NAC2 [Arabidopsis lyrata subsp. lyrata]>gi|297333079|gb|EFH63497.1| NAC domain protein NAC2 [Arabidopsis lyrata subsp. lyrata]	145337331	NM_105616.3	697	0	Arabidopsis thaliana NAC transcription factor protein family mRNA, complete cds	--	--	--	--	O49255	1271	1.1e-138	NAC transcription factor 29 OS=Arabidopsis thaliana GN=NAC029 PE=2 SV=1	PF02365	No apical meristem (NAM) protein	GO:0006355	regulation of transcription, DNA-templated	GO:0003677	DNA binding	--	--	--	--	FALSE	-2.2872	0.18168	DOWN	-2.8979	0.0031172	FALSE	-1.0477	0.3391	FALSE	-0.9816	0.25347
	1-2k.c28212/2/2039	10.9767	5.30333	8.99667	0.00666667	9.38667	2.62	4.3	2042	297806417	XP_002871092.1	2487	1.6e-278	hypothetical protein ARALYDRAFT_908325 [Arabidopsis lyrata subsp. lyrata]>gi|297316929|gb|EFH47351.1| hypothetical protein ARALYDRAFT_908325 [Arabidopsis lyrata subsp. lyrata]	145357627	NM_120523.3	1395	0	Arabidopsis thaliana NAC family transcriptional activator mRNA, complete cds	--	--	--	--	Q84K00	2455	1.2e-275	NAC domain-containing protein 78 OS=Arabidopsis thaliana GN=NAC078 PE=2 SV=2	PF02365	No apical meristem (NAM) protein	GO:0006355	regulation of transcription, DNA-templated	GO:0003677	DNA binding	--	--	--	--	FALSE	-1.0977	1	FALSE	-1.3861	0.40225	DOWN	-10.052	4.4092e-13	FALSE	0.11913	1
	1-2k.c31332/1/1599	18.0333	26.83	41.3133	49.9	52.7667	55.8367	55.2567	1308	297806799	XP_002871283.1	1662	4.8e-183	ANAC079/ANAC080/ATNAC4 [Arabidopsis lyrata subsp. lyrata]>gi|297317120|gb|EFH47542.1| ANAC079/ANAC080/ATNAC4 [Arabidopsis lyrata subsp. lyrata]	297806798	XM_002871237.1	946	0	Arabidopsis lyrata subsp. lyrata ANAC079/ANAC080/ATNAC4, mRNA	--	--	--	--	Q9FLJ2	1410	1.1e-154	NAC domain-containing protein 100 OS=Arabidopsis thaliana GN=NAC100 PE=2 SV=1	PF11722//PF02365	CCCH zinc finger in TRM13 protein//No apical meristem (NAM) protein	GO:0006355	regulation of transcription, DNA-templated	GO:0008168//GO:0003677	methyltransferase activity//DNA binding	--	--	--	--	FALSE	0.38873	1	FALSE	1.6346	0.18071	FALSE	1.5899	0.061441	FALSE	0.3957	1
	1-2k.c31788/1/1044	117.5	260.747	263.93	254.89	281.943	214.413	170.087	1041	15223963	NP_177869.1	1277	1.7e-138	NAC domain containing protein 32 [Arabidopsis thaliana]>gi|12323394|gb|AAG51675.1|AC010704_19 GRAB1-like protein; 10550-11502 [Arabidopsis thaliana]>gi|26452970|dbj|BAC43561.1| GRAB1-like protein [Arabidopsis thaliana]>gi|30793825|gb|AAP40365.1| putative GRAB1 protein [Arabidopsis thaliana]>gi|332197858|gb|AEE35979.1| NAC domain containing protein 32 [Arabidopsis thaliana]	30699258	NM_106394.2	621	0	Arabidopsis thaliana NAC domain containing protein 32 mRNA, complete cds	--	--	--	--	Q39013	825	6e-87	NAC domain-containing protein 2 OS=Arabidopsis thaliana GN=NAC002 PE=2 SV=2	PF02365	No apical meristem (NAM) protein	GO:0009407//GO:0010583//GO:0007275//GO:0006355	toxin catabolic process//response to cyclopentenone//multicellular organismal development//regulation of transcription, DNA-templated	GO:0003700//GO:0003677	transcription factor activity, sequence-specific DNA binding//DNA binding	GO:0005667//GO:0005634	transcription factor complex//nucleus	--	--	FALSE	-0.68382	1	FALSE	0.51608	0.91087	FALSE	1.1918	0.13018	FALSE	0.108	1
	1-2k.c32839/1/1459	9.62667	15.1833	23.41	28.36	31.49	40.58	41.7533	1466	727410927	XP_010518044.1	1583	7.7e-174	PREDICTED: NAC domain-containing protein 100-like [Camelina sativa]	727410926	XM_010519742.1	1056	0	PREDICTED: Camelina sativa NAC domain-containing protein 100-like (LOC104793365), mRNA	--	--	--	--	Q9FLJ2	720	1.3e-74	NAC domain-containing protein 100 OS=Arabidopsis thaliana GN=NAC100 PE=2 SV=1	PF02365	No apical meristem (NAM) protein	GO:0006355	regulation of transcription, DNA-templated	GO:0003677	DNA binding	--	--	--	--	FALSE	0.82302	1	UP	2.1115	0.046023	FALSE	1.6072	0.076208	FALSE	0.44731	1
	2-3k.c12909/2/1302	192.04	194.067	232.887	134.553	304.143	34.4233	55.03	1303	725539558	AIY30328.1	1449	2.4e-158	NAC026 [Olimarabidopsis pumila]	725539557	KM457621.1	1200	0	Olimarabidopsis pumila NAC026 (NAC026) mRNA, complete cds	--	--	--	--	Q93VY3	1410	1.1e-154	NAC domain-containing protein 72 OS=Arabidopsis thaliana GN=NAC072 PE=2 SV=1	PF02365	No apical meristem (NAM) protein	GO:0006355	regulation of transcription, DNA-templated	GO:0003677	DNA binding	--	--	--	--	FALSE	-2.202	1	DOWN	-1.9523	0.024923	FALSE	-0.37031	1	FALSE	0.46328	1
	2-3k.c18370/1/1892.1	8.87333	6.02667	5.21667	4.09	0.896667	2.01	1.19333	1171	145322887	NP_001030683.2	880	2e-92	no apical meristem-domain containing transcriptional regulator [Arabidopsis thaliana]>gi|15795128|dbj|BAB02506.1| NAM (no apical meristem) protein-like [Arabidopsis thaliana]>gi|332641748|gb|AEE75269.1| no apical meristem-domain containing transcriptional regulator [Arabidopsis thaliana]	186510014	NM_001035606.3	437	0	Arabidopsis thaliana no apical meristem-domain containing transcriptional regulator mRNA, complete cds	--	--	--	--	Q84TE6	671	4.9e-69	NAC domain-containing protein 21/22 OS=Arabidopsis thaliana GN=NAC021 PE=1 SV=2	PF02365	No apical meristem (NAM) protein	GO:0006355	regulation of transcription, DNA-templated	GO:0003677	DNA binding	GO:0005634	nucleus	--	--	FALSE	-2.1011	1	FALSE	-2.854	0.13569	FALSE	-1.0464	0.79036	FALSE	-2.4839	0.66006
	2-3k.c23587/1/1147	113.897	85.6567	48.9833	52.7333	43.85	67.58	97.9133	1146	297810999	XP_002873383.1	1412	4.1e-154	hypothetical protein ARALYDRAFT_908859 [Arabidopsis lyrata subsp. lyrata]>gi|297319220|gb|EFH49642.1| hypothetical protein ARALYDRAFT_908859 [Arabidopsis lyrata subsp. lyrata]	145361142	NM_147856.3	828	0	Arabidopsis thaliana protein ATAF2 mRNA, complete cds	--	--	--	--	Q9C598	1403	6.3e-154	Protein ATAF2 OS=Arabidopsis thaliana GN=NAC081 PE=1 SV=1	PF02365	No apical meristem (NAM) protein	GO:0006355	regulation of transcription, DNA-templated	GO:0003677	DNA binding	--	--	--	--	FALSE	1.0604	1	FALSE	-0.11841	1	FALSE	-1.0346	0.31857	FALSE	-0.13887	1
	2-3k.c25487/1/1070	73.4167	71.29	58.9833	15.8867	12.7533	71.1033	31.66	1070	727588906	XP_010467456.1	1333	5.5e-145	PREDICTED: NAC transcription factor 29-like [Camelina sativa]	727588905	XM_010469154.1	763	0	PREDICTED: Camelina sativa NAC transcription factor 29-like (LOC104747510), mRNA	--	--	--	--	Q9ZVH0	430	3.9e-41	Protein FEZ OS=Arabidopsis thaliana GN=FEZ PE=2 SV=1	PF02365	No apical meristem (NAM) protein	GO:0006355	regulation of transcription, DNA-templated	GO:0003677	DNA binding	--	--	--	--	FALSE	-0.83451	1	FALSE	-1.0892	0.4824	DOWN	-2.074	0.005958	DOWN	-2.1503	0.022742
	2-3k.c3674/1/1005	132.737	485.307	286.993	252.553	198.28	226.047	187.217	1005	297807335	XP_002871551.1	1046	9.8e-112	ANAC083 [Arabidopsis lyrata subsp. lyrata]>gi|297317388|gb|EFH47810.1| ANAC083 [Arabidopsis lyrata subsp. lyrata]	145357958	NM_121321.3	733	0	Arabidopsis thaliana NAC domain containing protein 83 mRNA, complete cds	--	--	--	--	Q9FY93	1046	1.4e-112	NAC domain-containing protein 83 OS=Arabidopsis thaliana GN=NAC083 PE=1 SV=1	PF02365	No apical meristem (NAM) protein	GO:0006355	regulation of transcription, DNA-templated	GO:0003677	DNA binding	--	--	--	--	FALSE	-0.61279	1	FALSE	0.51534	0.91308	FALSE	0.99878	0.27561	FALSE	-0.50235	1
	2-3k.c6230/1/2645	0.54	0	9.30667	17.75	16.5833	5.94	13.88	1342	725539558	AIY30328.1	1102	4.2e-118	NAC026 [Olimarabidopsis pumila]	725539557	KM457621.1	681	0	Olimarabidopsis pumila NAC026 (NAC026) mRNA, complete cds	--	--	--	--	Q93VY3	1066	8.8e-115	NAC domain-containing protein 72 OS=Arabidopsis thaliana GN=NAC072 PE=2 SV=1	PF02365	No apical meristem (NAM) protein	GO:0006355	regulation of transcription, DNA-templated	GO:0003677	DNA binding	--	--	--	--	FALSE	0.60888	1	FALSE	4.7259	0.17224	UP	5.0574	6.6182e-07	FALSE	0.82475	0.97819
	2-3k.c7103/1/2943.1	33.6567	35.5533	36.53	31.59	82.69	45.73	44.9633	1207	15223456	NP_171677.1	1173	2.2e-126	putative transcriptional activator with NAC domain [Arabidopsis thaliana]>gi|51316206|sp|Q39013.2|NAC2_ARATH RecName: Full=NAC domain-containing protein 2; Short=ANAC002>gi|8671840|gb|AAF78403.1|AC009273_9 Strong similarity to OsNAC6 protein from Oryza sativa gb|AB028185. ESTs gb|AI996805, gb|T22869 and gb|AI100172 come from this gene [Arabidopsis thaliana]>gi|13877717|gb|AAK43936.1|AF370617_1 Os…	30678178	NM_100054.2	577	0	Arabidopsis thaliana putative transcriptional activator with NAC domain mRNA, complete cds	--	--	--	--	Q39013	1173	3.1e-127	NAC domain-containing protein 2 OS=Arabidopsis thaliana GN=NAC002 PE=2 SV=2	PF02365	No apical meristem (NAM) protein	GO:0009753//GO:0007275//GO:0009611//GO:0006355//GO:0009414//GO:0010200//GO:0042538//GO:0009695//GO:0009788//GO:0009620	response to jasmonic acid//multicellular organismal development//response to wounding//regulation of transcription, DNA-templated//response to water deprivation//response to chitin//hyperosmotic salinity response//jasmonic acid biosynthetic process//negative regulation of abscisic acid-activated signaling pathway//response to fungus	GO:0003700//GO:0003677	transcription factor activity, sequence-specific DNA binding//DNA binding	GO:0005667//GO:0005634	transcription factor complex//nucleus	--	--	FALSE	0.21333	1	FALSE	0.31331	1	FALSE	0.019264	1	FALSE	1.2275	0.52102
	3-6k.c2597/3/4775.2	15.0433	57.9567	37.08	55.09	34.4167	104.13	132.057	1313	15223456	NP_171677.1	1365	1.3e-148	putative transcriptional activator with NAC domain [Arabidopsis thaliana]>gi|51316206|sp|Q39013.2|NAC2_ARATH RecName: Full=NAC domain-containing protein 2; Short=ANAC002>gi|8671840|gb|AAF78403.1|AC009273_9 Strong similarity to OsNAC6 protein from Oryza sativa gb|AB028185. ESTs gb|AI996805, gb|T22869 and gb|AI100172 come from this gene [Arabidopsis thaliana]>gi|13877717|gb|AAK43936.1|AF370617_1 Os…	30678178	NM_100054.2	746	0	Arabidopsis thaliana putative transcriptional activator with NAC domain mRNA, complete cds	--	--	--	--	Q39013	1365	1.8e-149	NAC domain-containing protein 2 OS=Arabidopsis thaliana GN=NAC002 PE=2 SV=2	PF02365	No apical meristem (NAM) protein	GO:0006355//GO:0009611//GO:0007275//GO:0009753//GO:0009620//GO:0009788//GO:0009695//GO:0042538//GO:0010200//GO:0009414	regulation of transcription, DNA-templated//response to wounding//multicellular organismal development//response to jasmonic acid//response to fungus//negative regulation of abscisic acid-activated signaling pathway//jasmonic acid biosynthetic process//hyperosmotic salinity response//response to chitin//response to water deprivation	GO:0003700//GO:0003677	transcription factor activity, sequence-specific DNA binding//DNA binding	GO:0005634//GO:0005667	nucleus//transcription factor complex	--	--	FALSE	1.8128	1	FALSE	3.194	0.092975	FALSE	1.9305	0.061045	FALSE	-0.13421	1
SBP	1-2k.c36194/1/1255	3.31	9.23333	17.3833	29.27	40.7467	26.01	16.82	1262	297824179	XP_002879972.1	1621	2.6e-178	hypothetical protein ARALYDRAFT_903568 [Arabidopsis lyrata subsp. lyrata]>gi|297325811|gb|EFH56231.1| hypothetical protein ARALYDRAFT_903568 [Arabidopsis lyrata subsp. lyrata]	727453521	XM_010510303.1	963	0	PREDICTED: Camelina sativa squamosa promoter-binding-like protein 9 (LOC104785154), mRNA	--	--	--	--	Q700W2	1579	2.7e-174	Squamosa promoter-binding-like protein 9 OS=Arabidopsis thaliana GN=SPL9 PE=2 SV=2	PF03110	SBP domain	--	--	GO:0003677	DNA binding	GO:0005634	nucleus	--	--	FALSE	-0.11569	1	FALSE	2.2848	0.095993	UP	3.1954	0.00018004	FALSE	1.2464	0.80158
	2-3k.c11129/1/3350	1.14333	0	2.50667	0.243333	0.113333	0.703333	0	3350	727608458	XP_010477355.1	4519	0	PREDICTED: squamosa promoter-binding-like protein 14 isoform X1 [Camelina sativa]	727574367	XM_010461490.1	2360	0	PREDICTED: Camelina sativa squamosa promoter-binding-like protein 14 (LOC104740795), mRNA	--	--	--	--	Q8RY95	4444	0	Squamosa promoter-binding-like protein 14 OS=Arabidopsis thaliana GN=SPL14 PE=2 SV=3	PF00023//PF03110//PF13606//PF08802	Ankyrin repeat//SBP domain//Ankyrin repeat//Cytochrome B6-F complex Fe-S subunit	GO:0055114//GO:0006118	oxidation-reduction process//obsolete electron transport	GO:0005515//GO:0003677//GO:0009496//GO:0051537	protein binding//DNA binding//plastoquinol--plastocyanin reductase activity//2 iron, 2 sulfur cluster binding	GO:0005634//GO:0009512//GO:0042651	nucleus//cytochrome b6f complex//thylakoid membrane	--	--	DOWN	#NAME?	0.028852	FALSE	#NAME?	0.48044	FALSE	-2.0078	1	FALSE	-4.4944	0.319
	2-3k.c11700/1/3585	25.8933	16.5367	6.02333	7.81	20.61	2.96	3.50333	3582	727452262	XP_010507933.1	4179	0	PREDICTED: squamosa promoter-binding-like protein 1 [Camelina sativa]	727452261	XM_010509631.1	2338	0	PREDICTED: Camelina sativa squamosa promoter-binding-like protein 1 (LOC104784595), mRNA	--	--	--	--	Q9SMX9	3771	0	Squamosa promoter-binding-like protein 1 OS=Arabidopsis thaliana GN=SPL1 PE=1 SV=2	PF00023//PF03110//PF13606	Ankyrin repeat//SBP domain//Ankyrin repeat	--	--	GO:0003677//GO:0005515	DNA binding//protein binding	GO:0005634	nucleus	--	--	FALSE	-0.87241	1	DOWN	-2.9567	0.0013721	DOWN	-1.6196	0.030449	FALSE	1.7982	0.063472
	2-3k.c15477/3/3480	4.49333	5.57667	3.59667	2.34	4.01333	0	0	3486	727452262	XP_010507933.1	4179	0	PREDICTED: squamosa promoter-binding-like protein 1 [Camelina sativa]	727452261	XM_010509631.1	2295	0	PREDICTED: Camelina sativa squamosa promoter-binding-like protein 1 (LOC104784595), mRNA	--	--	--	--	Q9SMX9	3771	0	Squamosa promoter-binding-like protein 1 OS=Arabidopsis thaliana GN=SPL1 PE=1 SV=2	PF00023//PF13606//PF03110	Ankyrin repeat//Ankyrin repeat//SBP domain	--	--	GO:0003677//GO:0005515	DNA binding//protein binding	GO:0005634	nucleus	--	--	FALSE	#NAME?	1	DOWN	#NAME?	5.0143e-07	FALSE	-0.87711	1	FALSE	0.17609	1
	2-3k.c18556/1/5191	0	4.66	1.96333	4.04	4.15	6.16667	3.3	2621	727563650	XP_010454135.1	3706	0	PREDICTED: squamosa promoter-binding-like protein 7 [Camelina sativa]	727489235	XM_010422359.1	2011	0	PREDICTED: Camelina sativa squamosa promoter-binding-like protein 7 (LOC104706198), transcript variant X2, mRNA	--	--	--	--	Q8S9G8	3477	0	Squamosa promoter-binding-like protein 7 OS=Arabidopsis thaliana GN=SPL7 PE=1 SV=2	PF03110	SBP domain	--	--	GO:0003677	DNA binding	GO:0005634	nucleus	--	--	FALSE	0.70988	1	UP	Inf	0.0025916	UP	Inf	0.0020004	FALSE	1.0463	1
	2-3k.c21848/1/3236	0.03	2.09333	2.56	3.73333	0	2.77333	3.33	3253	297845078	XP_002890420.1	4239	0	hypothetical protein ARALYDRAFT_472338 [Arabidopsis lyrata subsp. lyrata]>gi|297336262|gb|EFH66679.1| hypothetical protein ARALYDRAFT_472338 [Arabidopsis lyrata subsp. lyrata]	297845077	XM_002890374.1	2311	0	Arabidopsis lyrata subsp. lyrata hypothetical protein, mRNA	--	--	--	--	Q8RY95	4194	0	Squamosa promoter-binding-like protein 14 OS=Arabidopsis thaliana GN=SPL14 PE=2 SV=3	PF00023//PF02783//PF08802//PF13606//PF03110	Ankyrin repeat//Methyl-coenzyme M reductase beta subunit, N-terminal domain//Cytochrome B6-F complex Fe-S subunit//Ankyrin repeat//SBP domain	GO:0006118//GO:0055114//GO:0046656	obsolete electron transport//oxidation-reduction process//folic acid biosynthetic process	GO:0051537//GO:0009496//GO:0003677//GO:0005515//GO:0050524	2 iron, 2 sulfur cluster binding//plastoquinol--plastocyanin reductase activity//DNA binding//protein binding//coenzyme-B sulfoethylthiotransferase activity	GO:0009512//GO:0005634//GO:0042651	cytochrome b6f complex//nucleus//thylakoid membrane	--	--	FALSE	0.36385	1	UP	6.871	0.023835	UP	6.9917	0.021555	FALSE	#NAME?	0.71534
	2-3k.c27874/4/3060	4.00333	3.76333	11.2833	22.2933	23.18	20.6733	13.2033	2955	297807921	XP_002871844.1	3538	0	hypothetical protein ARALYDRAFT_909902 [Arabidopsis lyrata subsp. lyrata]>gi|297317681|gb|EFH48103.1| hypothetical protein ARALYDRAFT_909902 [Arabidopsis lyrata subsp. lyrata]	727643173	XM_010494619.1	2147	0	PREDICTED: Camelina sativa squamosa promoter-binding-like protein 7 (LOC104770225), transcript variant X2, mRNA	--	--	--	--	Q8S9G8	3284	0	Squamosa promoter-binding-like protein 7 OS=Arabidopsis thaliana GN=SPL7 PE=1 SV=2	PF03110	SBP domain	--	--	GO:0003677	DNA binding	GO:0005634	nucleus	--	--	FALSE	0.19336	1	FALSE	1.7784	0.17559	UP	2.6343	0.00045131	FALSE	1.0886	0.31533
	2-3k.c2824/5/2972	3.31333	3.74	4.98	4.25	10.26	4.54667	2.49	2975	727563650	XP_010454135.1	3677	0	PREDICTED: squamosa promoter-binding-like protein 7 [Camelina sativa]	727643170	XM_010494618.1	1611	0	PREDICTED: Camelina sativa squamosa promoter-binding-like protein 7 (LOC104770225), transcript variant X1, mRNA	--	--	--	--	Q8S9G8	3448	0	Squamosa promoter-binding-like protein 7 OS=Arabidopsis thaliana GN=SPL7 PE=1 SV=2	PF03110	SBP domain	--	--	GO:0003677	DNA binding	GO:0005634	nucleus	--	--	FALSE	-1.1023	1	FALSE	-0.47861	1	FALSE	0.51121	1	FALSE	1.0967	0.60415
	2-3k.c6105/1/2876	0.0833333	1.06333	1.12333	2.47333	1.21333	2.61333	1.93333	2863	727563650	XP_010454135.1	3445	0	PREDICTED: squamosa promoter-binding-like protein 7 [Camelina sativa]	727643170	XM_010494618.1	1627	0	PREDICTED: Camelina sativa squamosa promoter-binding-like protein 7 (LOC104770225), transcript variant X1, mRNA	--	--	--	--	Q8S9G8	3226	0	Squamosa promoter-binding-like protein 7 OS=Arabidopsis thaliana GN=SPL7 PE=1 SV=2	--	--	--	--	--	--	--	--	--	--	FALSE	0.81329	1	FALSE	4.4991	0.050297	UP	4.8387	0.019241	FALSE	0.12938	1
	3-6k.c13175/1/3826	0	0.18	0.866667	1.47667	0.03	1.15	1.51	3864	727608458	XP_010477355.1	3212	0	PREDICTED: squamosa promoter-binding-like protein 14 isoform X1 [Camelina sativa]	565498027	XM_006306591.1	1756	0	Capsella rubella hypothetical protein (CARUB_v10008169mg) mRNA, complete cds	--	--	--	--	Q8RY95	3154	0	Squamosa promoter-binding-like protein 14 OS=Arabidopsis thaliana GN=SPL14 PE=2 SV=3	PF00023//PF08802//PF02783//PF03110//PF13606	Ankyrin repeat//Cytochrome B6-F complex Fe-S subunit//Methyl-coenzyme M reductase beta subunit, N-terminal domain//SBP domain//Ankyrin repeat	GO:0006118//GO:0055114//GO:0046656	obsolete electron transport//oxidation-reduction process//folic acid biosynthetic process	GO:0009496//GO:0051537//GO:0003677//GO:0005515//GO:0050524	plastoquinol--plastocyanin reductase activity//2 iron, 2 sulfur cluster binding//DNA binding//protein binding//coenzyme-B sulfoethylthiotransferase activity	GO:0005634//GO:0009512//GO:0042651	nucleus//cytochrome b6f complex//thylakoid membrane	--	--	FALSE	0.77528	1	UP	Inf	0.005202	UP	Inf	0.0056573	FALSE	-4.8375	1
	3-6k.c14312/1/3950	0	0.29	0.786667	0.8	0	1.21333	1.18333	3998	727608458	XP_010477355.1	4499	0	PREDICTED: squamosa promoter-binding-like protein 14 isoform X1 [Camelina sativa]	727574367	XM_010461490.1	2424	0	PREDICTED: Camelina sativa squamosa promoter-binding-like protein 14 (LOC104740795), mRNA	--	--	--	--	Q8RY95	4424	0	Squamosa promoter-binding-like protein 14 OS=Arabidopsis thaliana GN=SPL14 PE=2 SV=3	PF13606//PF03110//PF08802//PF00023	Ankyrin repeat//SBP domain//Cytochrome B6-F complex Fe-S subunit//Ankyrin repeat	GO:0055114//GO:0006118	oxidation-reduction process//obsolete electron transport	GO:0005515//GO:0003677//GO:0051537//GO:0009496	protein binding//DNA binding//2 iron, 2 sulfur cluster binding//plastoquinol--plastocyanin reductase activity	GO:0042651//GO:0005634//GO:0009512	thylakoid membrane//nucleus//cytochrome b6f complex	--	--	FALSE	0.59901	1	UP	Inf	0.033025	UP	Inf	0.026973	FALSE	#NAME?	0.85164
	3-6k.c16099/1/3481	1.51	0.0133333	2.15333	0.603333	3.34333	0	0	3482	297845078	XP_002890420.1	4324	0	hypothetical protein ARALYDRAFT_472338 [Arabidopsis lyrata subsp. lyrata]>gi|297336262|gb|EFH66679.1| hypothetical protein ARALYDRAFT_472338 [Arabidopsis lyrata subsp. lyrata]	297845077	XM_002890374.1	2353	0	Arabidopsis lyrata subsp. lyrata hypothetical protein, mRNA	--	--	--	--	Q8RY95	4274	0	Squamosa promoter-binding-like protein 14 OS=Arabidopsis thaliana GN=SPL14 PE=2 SV=3	PF00023//PF13606//PF03110//PF02783//PF08802	Ankyrin repeat//Ankyrin repeat//SBP domain//Methyl-coenzyme M reductase beta subunit, N-terminal domain//Cytochrome B6-F complex Fe-S subunit	GO:0055114//GO:0046656//GO:0006118	oxidation-reduction process//folic acid biosynthetic process//obsolete electron transport	GO:0005515//GO:0050524//GO:0009496//GO:0051537//GO:0003677	protein binding//coenzyme-B sulfoethylthiotransferase activity//plastoquinol--plastocyanin reductase activity//2 iron, 2 sulfur cluster binding//DNA binding	GO:0005634//GO:0009512//GO:0042651	nucleus//cytochrome b6f complex//thylakoid membrane	--	--	DOWN	#NAME?	0.033849	FALSE	#NAME?	0.097147	FALSE	-1.2394	1	FALSE	0.71213	1
	3-6k.c16270/1/3794	0	1.35333	1.71333	4.08	0	3.80667	3.72333	3780	727608458	XP_010477355.1	4504	0	PREDICTED: squamosa promoter-binding-like protein 14 isoform X1 [Camelina sativa]	297845077	XM_002890374.1	2401	0	Arabidopsis lyrata subsp. lyrata hypothetical protein, mRNA	--	--	--	--	Q8RY95	4427	0	Squamosa promoter-binding-like protein 14 OS=Arabidopsis thaliana GN=SPL14 PE=2 SV=3	PF00023//PF13606//PF03110//PF08802//PF02783	Ankyrin repeat//Ankyrin repeat//SBP domain//Cytochrome B6-F complex Fe-S subunit//Methyl-coenzyme M reductase beta subunit, N-terminal domain	GO:0046656//GO:0055114//GO:0006118	folic acid biosynthetic process//oxidation-reduction process//obsolete electron transport	GO:0050524//GO:0005515//GO:0003677//GO:0051537//GO:0009496	coenzyme-B sulfoethylthiotransferase activity//protein binding//DNA binding//2 iron, 2 sulfur cluster binding//plastoquinol--plastocyanin reductase activity	GO:0042651//GO:0009512//GO:0005634	thylakoid membrane//cytochrome b6f complex//nucleus	--	--	FALSE	1.0869	1	UP	Inf	0.0012348	UP	Inf	0.00082101	FALSE	#NAME?	0.70451
	3-6k.c16775/1/4084.1	2.49333	1.85333	1.78	0.7	4.65333	0.616667	0.11	3216	727608458	XP_010477355.1	3884	0	PREDICTED: squamosa promoter-binding-like protein 14 isoform X1 [Camelina sativa]	727574367	XM_010461490.1	2020	0	PREDICTED: Camelina sativa squamosa promoter-binding-like protein 14 (LOC104740795), mRNA	--	--	--	--	Q8RY95	3845	0	Squamosa promoter-binding-like protein 14 OS=Arabidopsis thaliana GN=SPL14 PE=2 SV=3	PF02783//PF08802//PF03110	Methyl-coenzyme M reductase beta subunit, N-terminal domain//Cytochrome B6-F complex Fe-S subunit//SBP domain	GO:0055114//GO:0046656//GO:0006118	oxidation-reduction process//folic acid biosynthetic process//obsolete electron transport	GO:0050524//GO:0051537//GO:0009496//GO:0003677	coenzyme-B sulfoethylthiotransferase activity//2 iron, 2 sulfur cluster binding//plastoquinol--plastocyanin reductase activity//DNA binding	GO:0042651//GO:0005634//GO:0009512	thylakoid membrane//nucleus//cytochrome b6f complex	--	--	FALSE	-4.0604	0.80246	FALSE	-4.6834	0.34996	FALSE	-1.8808	0.87015	FALSE	1.4766	0.57439
	3-6k.c20901/1/3566	0.556667	0.35	0	1.87667	0	2.92333	2.68667	3538	727452262	XP_010507933.1	4160	0	PREDICTED: squamosa promoter-binding-like protein 1 [Camelina sativa]	727452261	XM_010509631.1	2346	0	PREDICTED: Camelina sativa squamosa promoter-binding-like protein 1 (LOC104784595), mRNA	--	--	--	--	Q9SMX9	3772	0	Squamosa promoter-binding-like protein 1 OS=Arabidopsis thaliana GN=SPL1 PE=1 SV=2	PF03110//PF13606//PF00023	SBP domain//Ankyrin repeat//Ankyrin repeat	--	--	GO:0003677//GO:0005515	DNA binding//protein binding	GO:0005634	nucleus	--	--	FALSE	Inf	1	FALSE	2.135	0.93908	FALSE	1.7243	0.76591	FALSE	NA	NA
	3-6k.c23333/1/4020	0	1.33667	1.97	4.36	0.0166667	3.22	3.45667	4005	727608458	XP_010477355.1	4536	0	PREDICTED: squamosa promoter-binding-like protein 14 isoform X1 [Camelina sativa]	727574367	XM_010461490.1	2447	0	PREDICTED: Camelina sativa squamosa promoter-binding-like protein 14 (LOC104740795), mRNA	--	--	--	--	Q8RY95	4466	0	Squamosa promoter-binding-like protein 14 OS=Arabidopsis thaliana GN=SPL14 PE=2 SV=3	PF08802//PF02783//PF13606//PF03110//PF00023	Cytochrome B6-F complex Fe-S subunit//Methyl-coenzyme M reductase beta subunit, N-terminal domain//Ankyrin repeat//SBP domain//Ankyrin repeat	GO:0006118//GO:0046656//GO:0055114	obsolete electron transport//folic acid biosynthetic process//oxidation-reduction process	GO:0003677//GO:0009496//GO:0051537//GO:0005515//GO:0050524	DNA binding//plastoquinol--plastocyanin reductase activity//2 iron, 2 sulfur cluster binding//protein binding//coenzyme-B sulfoethylthiotransferase activity	GO:0005634//GO:0009512//GO:0042651	nucleus//cytochrome b6f complex//thylakoid membrane	--	--	FALSE	0.8114	1	UP	Inf	0.0060197	UP	Inf	0.00097455	FALSE	-7.0432	0.92908
	3-6k.c5125/1/2850	1.65	0	0.406667	0.75	0	0.106667	0.01	2859	727563650	XP_010454135.1	3706	0	PREDICTED: squamosa promoter-binding-like protein 7 [Camelina sativa]	727489235	XM_010422359.1	2113	0	PREDICTED: Camelina sativa squamosa promoter-binding-like protein 7 (LOC104706198), transcript variant X2, mRNA	--	--	--	--	Q8S9G8	3477	0	Squamosa promoter-binding-like protein 7 OS=Arabidopsis thaliana GN=SPL7 PE=1 SV=2	PF03110	SBP domain	--	--	GO:0003677	DNA binding	GO:0005634	nucleus	--	--	FALSE	-5.4896	1	DOWN	-7.5148	0.012257	FALSE	-0.96426	1	FALSE	#NAME?	0.85193
	3-6k.c7701/1/5396	2.15	1.07333	0.96	0	2.32	0.176667	1.09333	2147	727574368	XP_010459792.1	2242	4.3e-250	PREDICTED: squamosa promoter-binding-like protein 14 [Camelina sativa]	565498027	XM_006306591.1	1282	0	Capsella rubella hypothetical protein (CARUB_v10008169mg) mRNA, complete cds	--	--	--	--	Q8RY95	2195	1.7e-245	Squamosa promoter-binding-like protein 14 OS=Arabidopsis thaliana GN=SPL14 PE=2 SV=3	PF08802//PF03110	Cytochrome B6-F complex Fe-S subunit//SBP domain	GO:0006118//GO:0055114	obsolete electron transport//oxidation-reduction process	GO:0051537//GO:0009496//GO:0003677	2 iron, 2 sulfur cluster binding//plastoquinol--plastocyanin reductase activity//DNA binding	GO:0042651//GO:0005634//GO:0009512	thylakoid membrane//nucleus//cytochrome b6f complex	--	--	FALSE	0.00089216	1	FALSE	-0.989	1	FALSE	#NAME?	0.24739	FALSE	1.2829	1
	3-6k.c9333/1/3928.1	0.0133333	2.08333	2.69	5.26667	0	5.99	6.28667	2471	727574368	XP_010459792.1	2769	4.0e-311	PREDICTED: squamosa promoter-binding-like protein 14 [Camelina sativa]	565498027	XM_006306591.1	1544	0	Capsella rubella hypothetical protein (CARUB_v10008169mg) mRNA, complete cds	--	--	--	--	Q8RY95	2737	2.8e-308	Squamosa promoter-binding-like protein 14 OS=Arabidopsis thaliana GN=SPL14 PE=2 SV=3	PF08802//PF03110	Cytochrome B6-F complex Fe-S subunit//SBP domain	GO:0055114//GO:0006118	oxidation-reduction process//obsolete electron transport	GO:0003677//GO:0009496//GO:0051537	DNA binding//plastoquinol--plastocyanin reductase activity//2 iron, 2 sulfur cluster binding	GO:0009512//GO:0005634//GO:0042651	cytochrome b6f complex//nucleus//thylakoid membrane	--	--	FALSE	1.2089	1	UP	8.6666	0.0081833	UP	8.3698	0.0054492	FALSE	#NAME?	0.7334
CAMTA	2-3k.c12904/2/2985	4.70333	2.16	1.43333	0.15	0.7	1.22333	1.94667	2987	297821451	XP_002878608.1	4424	0	hypothetical protein ARALYDRAFT_481093 [Arabidopsis lyrata subsp. lyrata]>gi|297324447|gb|EFH54867.1| hypothetical protein ARALYDRAFT_481093 [Arabidopsis lyrata subsp. lyrata]	297821450	XM_002878562.1	2526	0	Arabidopsis lyrata subsp. lyrata hypothetical protein, mRNA	--	--	--	--	Q8GSA7	4404	0	Calmodulin-binding transcription activator 3 OS=Arabidopsis thaliana GN=CMTA3 PE=1 SV=1	PF00023//PF01833//PF00612//PF03859//PF13606	Ankyrin repeat//IPT/TIG domain//IQ calmodulin-binding motif//CG-1 domain//Ankyrin repeat	--	--	GO:0005515//GO:0003677	protein binding//DNA binding	GO:0005634	nucleus	--	--	FALSE	0.34906	1	FALSE	-1.364	0.52383	DOWN	-4.8685	0.00022198	FALSE	-1.0305	1
	2-3k.c16735/7/3301	5.66667	2.27333	6.81333	0.666667	4.3	6.92667	7.33	3258	565457939	XP_006286969.1	4425	0	hypothetical protein CARUB_v10000120mg [Capsella rubella]>gi|482555675|gb|EOA19867.1| hypothetical protein CARUB_v10000120mg [Capsella rubella]	727493888	XM_010424684.1	2348	0	PREDICTED: Camelina sativa calmodulin-binding transcription activator 1 (LOC104708177), transcript variant X1, mRNA	--	--	--	--	Q9FY74	4332	0	Calmodulin-binding transcription activator 1 OS=Arabidopsis thaliana GN=CMTA1 PE=2 SV=2	PF13606//PF03859//PF00612//PF00023//PF01833	Ankyrin repeat//CG-1 domain//IQ calmodulin-binding motif//Ankyrin repeat//IPT/TIG domain	--	--	GO:0003677//GO:0005515	DNA binding//protein binding	GO:0005634	nucleus	KOG0520	Uncharacterized conserved protein, contains IPT/TIG domain	FALSE	0.0778	1	FALSE	0.39385	1	FALSE	-2.9597	0.20091	FALSE	-0.63368	1
	2-3k.c1748/9/2910	0.293333	2.32333	0.363333	2.64667	0.323333	0.58	0.146667	2894	565478656	XP_006296968.1	3952	0	hypothetical protein CARUB_v10012963mg [Capsella rubella]>gi|482565677|gb|EOA29866.1| hypothetical protein CARUB_v10012963mg [Capsella rubella]	727585409	XM_010467421.1	2102	0	PREDICTED: Camelina sativa calmodulin-binding transcription activator 6-like (LOC104746037), transcript variant X3, mRNA	--	--	--	--	Q9LSP8	3765	0	Calmodulin-binding transcription activator 6 OS=Arabidopsis thaliana GN=CMTA6 PE=2 SV=1	PF00023//PF01833//PF00612//PF03859//PF13606	Ankyrin repeat//IPT/TIG domain//IQ calmodulin-binding motif//CG-1 domain//Ankyrin repeat	--	--	GO:0005515//GO:0003677	protein binding//DNA binding	GO:0005634	nucleus	--	--	FALSE	-1.5689	1	FALSE	-1.316	1	UP	3.1417	0.043311	FALSE	-0.24855	1
	2-3k.c17537/2/2966	28.4233	16.0233	11.6533	5.49	8.65667	5.48333	3.46	2962	297830306	XP_002883035.1	3939	0	calmodulin-binding protein [Arabidopsis lyrata subsp. lyrata]>gi|297328875|gb|EFH59294.1| calmodulin-binding protein [Arabidopsis lyrata subsp. lyrata]	727585409	XM_010467421.1	2093	0	PREDICTED: Camelina sativa calmodulin-binding transcription activator 6-like (LOC104746037), transcript variant X3, mRNA	--	--	--	--	Q9LSP8	3760	0	Calmodulin-binding transcription activator 6 OS=Arabidopsis thaliana GN=CMTA6 PE=2 SV=1	PF00023//PF01833//PF13606//PF03859//PF00612	Ankyrin repeat//IPT/TIG domain//Ankyrin repeat//CG-1 domain//IQ calmodulin-binding motif	--	--	GO:0005515//GO:0003677	protein binding//DNA binding	GO:0005634	nucleus	--	--	FALSE	-1.7842	1	DOWN	-3.1023	0.00084975	DOWN	-2.2617	0.0014058	FALSE	-0.35313	1
	2-3k.c1809/5/3308	11.87	7.74667	8.61	5.88667	3.95	5.12667	2.68	3310	297821451	XP_002878608.1	4792	0	hypothetical protein ARALYDRAFT_481093 [Arabidopsis lyrata subsp. lyrata]>gi|297324447|gb|EFH54867.1| hypothetical protein ARALYDRAFT_481093 [Arabidopsis lyrata subsp. lyrata]	297821450	XM_002878562.1	2751	0	Arabidopsis lyrata subsp. lyrata hypothetical protein, mRNA	--	--	--	--	Q8GSA7	4777	0	Calmodulin-binding transcription activator 3 OS=Arabidopsis thaliana GN=CMTA3 PE=1 SV=1	PF00023//PF01833//PF03859//PF13606//PF00612	Ankyrin repeat//IPT/TIG domain//CG-1 domain//Ankyrin repeat//IQ calmodulin-binding motif	--	--	GO:0005515//GO:0003677	protein binding//DNA binding	GO:0005634	nucleus	KOG0520	Uncharacterized conserved protein, contains IPT/TIG domain	FALSE	-1.6045	0.98896	FALSE	-2.0592	0.059898	FALSE	-0.95612	0.51696	FALSE	-1.0927	0.58805
	2-3k.c18662/2/3434	5.31	2.45333	1.87667	1.08	1.77	1.15333	0.7	3440	297841415	XP_002888589.1	4168	0	calmodulin binding protein [Arabidopsis lyrata subsp. lyrata]>gi|297334430|gb|EFH64848.1| calmodulin binding protein [Arabidopsis lyrata subsp. lyrata]	297841414	XM_002888543.1	2278	0	Arabidopsis lyrata subsp. lyrata calmodulin binding protein, mRNA	--	--	--	--	Q9FYG2	4039	0	Calmodulin-binding transcription activator 4 OS=Arabidopsis thaliana GN=CMTA4 PE=1 SV=1	PF01833//PF00023//PF13606//PF00612	IPT/TIG domain//Ankyrin repeat//Ankyrin repeat//IQ calmodulin-binding motif	--	--	GO:0005515//GO:0003677	protein binding//DNA binding	GO:0005634	nucleus	KOG0520	Uncharacterized conserved protein, contains IPT/TIG domain	FALSE	-1.528	1	DOWN	-3.0878	0.03732	FALSE	-2.2245	0.22077	FALSE	-0.038302	1
	2-3k.c24187/1/3362	0.0566667	1.64667	1.48	2.76333	0.0333333	3.61	2.50333	3339	727516996	XP_010434872.1	4370	0	PREDICTED: calmodulin-binding transcription activator 5-like isoform X1 [Camelina sativa]	727555348	XM_010451540.1	2288	0	PREDICTED: Camelina sativa calmodulin-binding transcription activator 5 (LOC104732010), mRNA	--	--	--	--	O23463	4204	0	Calmodulin-binding transcription activator 5 OS=Arabidopsis thaliana GN=CMTA5 PE=2 SV=2	PF01833//PF00023//PF13606//PF03859//PF00612	IPT/TIG domain//Ankyrin repeat//Ankyrin repeat//CG-1 domain//IQ calmodulin-binding motif	--	--	GO:0005515//GO:0003677	protein binding//DNA binding	GO:0005634	nucleus	KOG0520	Uncharacterized conserved protein, contains IPT/TIG domain	FALSE	0.75536	1	FALSE	5.7793	0.083484	UP	5.8585	0.043971	FALSE	-5.3449	1
	2-3k.c24957/1/3407	10.38	5.29333	4.57333	1.60333	1.48	5.31333	5.45333	3436	297821451	XP_002878608.1	4792	0	hypothetical protein ARALYDRAFT_481093 [Arabidopsis lyrata subsp. lyrata]>gi|297324447|gb|EFH54867.1| hypothetical protein ARALYDRAFT_481093 [Arabidopsis lyrata subsp. lyrata]	297821450	XM_002878562.1	2792	0	Arabidopsis lyrata subsp. lyrata hypothetical protein, mRNA	--	--	--	--	Q8GSA7	4777	0	Calmodulin-binding transcription activator 3 OS=Arabidopsis thaliana GN=CMTA3 PE=1 SV=1	PF01833//PF00023//PF03859//PF13606//PF00612	IPT/TIG domain//Ankyrin repeat//CG-1 domain//Ankyrin repeat//IQ calmodulin-binding motif	--	--	GO:0003677//GO:0005515	DNA binding//protein binding	GO:0005634	nucleus	KOG0520	Uncharacterized conserved protein, contains IPT/TIG domain	FALSE	0.27974	1	FALSE	-0.90651	0.69943	DOWN	-2.6244	0.0023619	FALSE	-1.56	0.59946
	2-3k.c25037/1/2954	9.79667	3.48	3.43	1.71667	1.38333	2.66333	2.38	2957	727555349	XP_010449842.1	4167	0	PREDICTED: calmodulin-binding transcription activator 5 [Camelina sativa]	727555348	XM_010451540.1	2285	0	PREDICTED: Camelina sativa calmodulin-binding transcription activator 5 (LOC104732010), mRNA	--	--	--	--	O23463	4157	0	Calmodulin-binding transcription activator 5 OS=Arabidopsis thaliana GN=CMTA5 PE=2 SV=2	PF00612//PF13606//PF03859//PF01833//PF00023	IQ calmodulin-binding motif//Ankyrin repeat//CG-1 domain//IPT/TIG domain//Ankyrin repeat	--	--	GO:0005515//GO:0003677	protein binding//DNA binding	GO:0005634	nucleus	KOG0520	Uncharacterized conserved protein, contains IPT/TIG domain	FALSE	-0.60359	1	FALSE	-2.1531	0.068651	DOWN	-2.3656	0.0086698	FALSE	-1.2256	1
	2-3k.c25198/1/5469	1.41667	6.88667	0.616667	0	0.0933333	0.68	0.446667	2716	297830306	XP_002883035.1	3702	0	calmodulin-binding protein [Arabidopsis lyrata subsp. lyrata]>gi|297328875|gb|EFH59294.1| calmodulin-binding protein [Arabidopsis lyrata subsp. lyrata]	727585409	XM_010467421.1	1967	0	PREDICTED: Camelina sativa calmodulin-binding transcription activator 6-like (LOC104746037), transcript variant X3, mRNA	--	--	--	--	Q9LSP8	3559	0	Calmodulin-binding transcription activator 6 OS=Arabidopsis thaliana GN=CMTA6 PE=2 SV=1	PF13606//PF03859//PF00612//PF00023//PF01833	Ankyrin repeat//CG-1 domain//IQ calmodulin-binding motif//Ankyrin repeat//IPT/TIG domain	--	--	GO:0003677//GO:0005515	DNA binding//protein binding	GO:0005634	nucleus	--	--	FALSE	-0.56339	1	FALSE	-1.9094	0.98065	FALSE	#NAME?	0.48283	FALSE	-2.6235	1
	2-3k.c26778/4/3517	23.1333	13.1333	17.0167	11.28	8.34	12.9533	11.4567	3512	297821451	XP_002878608.1	4809	0	hypothetical protein ARALYDRAFT_481093 [Arabidopsis lyrata subsp. lyrata]>gi|297324447|gb|EFH54867.1| hypothetical protein ARALYDRAFT_481093 [Arabidopsis lyrata subsp. lyrata]	297821450	XM_002878562.1	2818	0	Arabidopsis lyrata subsp. lyrata hypothetical protein, mRNA	--	--	--	--	Q8GSA7	4794	0	Calmodulin-binding transcription activator 3 OS=Arabidopsis thaliana GN=CMTA3 PE=1 SV=1	PF01833//PF00023//PF13606//PF03859//PF00612	IPT/TIG domain//Ankyrin repeat//Ankyrin repeat//CG-1 domain//IQ calmodulin-binding motif	--	--	GO:0003677//GO:0005515	DNA binding//protein binding	GO:0005634	nucleus	KOG0520	Uncharacterized conserved protein, contains IPT/TIG domain	FALSE	-0.56712	1	FALSE	-1.0401	0.5342	FALSE	-0.98515	0.3871	FALSE	-0.96784	0.8946
	2-3k.c27184/5/3295	35.4667	17.1	20.66	12.1433	16.1333	9.05	7.55	3253	727555349	XP_010449842.1	4435	0	PREDICTED: calmodulin-binding transcription activator 5 [Camelina sativa]	727555348	XM_010451540.1	2481	0	PREDICTED: Camelina sativa calmodulin-binding transcription activator 5 (LOC104732010), mRNA	--	--	--	--	O23463	4420	0	Calmodulin-binding transcription activator 5 OS=Arabidopsis thaliana GN=CMTA5 PE=2 SV=2	PF00023//PF01833//PF03859//PF13606//PF00612	Ankyrin repeat//IPT/TIG domain//CG-1 domain//Ankyrin repeat//IQ calmodulin-binding motif	--	--	GO:0005515//GO:0003677	protein binding//DNA binding	GO:0005634	nucleus	KOG0520	Uncharacterized conserved protein, contains IPT/TIG domain	FALSE	-1.5019	1	DOWN	-2.3033	0.010522	FALSE	-1.4432	0.057483	FALSE	-0.28928	1
	2-3k.c28983/1/3153	1.31333	2.66	2.75333	6.85667	0.00666667	5.37	9.35333	3148	727555349	XP_010449842.1	4435	0	PREDICTED: calmodulin-binding transcription activator 5 [Camelina sativa]	727555348	XM_010451540.1	2446	0	PREDICTED: Camelina sativa calmodulin-binding transcription activator 5 (LOC104732010), mRNA	--	--	--	--	O23463	4420	0	Calmodulin-binding transcription activator 5 OS=Arabidopsis thaliana GN=CMTA5 PE=2 SV=2	PF01833//PF00023//PF03859//PF13606//PF00612	IPT/TIG domain//Ankyrin repeat//CG-1 domain//Ankyrin repeat//IQ calmodulin-binding motif	--	--	GO:0005515//GO:0003677	protein binding//DNA binding	GO:0005634	nucleus	KOG0520	Uncharacterized conserved protein, contains IPT/TIG domain	FALSE	1.73	1	FALSE	2.9006	0.31844	FALSE	2.4257	0.58141	FALSE	-8.9568	0.82241
	2-3k.c29091/5/3363	3.68	3.03667	2.27667	0.216667	0.253333	0.426667	0	3365	297821451	XP_002878608.1	4809	0	hypothetical protein ARALYDRAFT_481093 [Arabidopsis lyrata subsp. lyrata]>gi|297324447|gb|EFH54867.1| hypothetical protein ARALYDRAFT_481093 [Arabidopsis lyrata subsp. lyrata]	297821450	XM_002878562.1	2804	0	Arabidopsis lyrata subsp. lyrata hypothetical protein, mRNA	--	--	--	--	Q8GSA7	4794	0	Calmodulin-binding transcription activator 3 OS=Arabidopsis thaliana GN=CMTA3 PE=1 SV=1	PF00023//PF01833//PF13606//PF03859//PF00612	Ankyrin repeat//IPT/TIG domain//Ankyrin repeat//CG-1 domain//IQ calmodulin-binding motif	--	--	GO:0005515//GO:0003677	protein binding//DNA binding	GO:0005634	nucleus	KOG0520	Uncharacterized conserved protein, contains IPT/TIG domain	FALSE	#NAME?	0.65883	DOWN	#NAME?	7.6367e-07	DOWN	-3.9285	0.0018206	FALSE	-3.2001	1
	2-3k.c5062/1/3354	3.14333	5.35333	1.82667	2.88333	0.393333	1.27667	0.456667	3286	297841415	XP_002888589.1	4108	0	calmodulin binding protein [Arabidopsis lyrata subsp. lyrata]>gi|297334430|gb|EFH64848.1| calmodulin binding protein [Arabidopsis lyrata subsp. lyrata]	297841414	XM_002888543.1	2228	0	Arabidopsis lyrata subsp. lyrata calmodulin binding protein, mRNA	--	--	--	--	Q9FYG2	4006	0	Calmodulin-binding transcription activator 4 OS=Arabidopsis thaliana GN=CMTA4 PE=1 SV=1	PF03859//PF13606//PF00612//PF11789//PF00023//PF01833	CG-1 domain//Ankyrin repeat//IQ calmodulin-binding motif//Zinc-finger of the MIZ type in Nse subunit//Ankyrin repeat//IPT/TIG domain	--	--	GO:0005515//GO:0008270//GO:0003677	protein binding//zinc ion binding//DNA binding	GO:0005634	nucleus	KOG0520	Uncharacterized conserved protein, contains IPT/TIG domain	FALSE	-2.1609	1	FALSE	-2.9337	0.48509	FALSE	-0.1458	1	FALSE	-2.2541	1
	2-3k.c7041/2/3341	0	0.806667	0	0.00333333	1.11667	1.21667	1.34667	3278	297821451	XP_002878608.1	4792	0	hypothetical protein ARALYDRAFT_481093 [Arabidopsis lyrata subsp. lyrata]>gi|297324447|gb|EFH54867.1| hypothetical protein ARALYDRAFT_481093 [Arabidopsis lyrata subsp. lyrata]	297821450	XM_002878562.1	2757	0	Arabidopsis lyrata subsp. lyrata hypothetical protein, mRNA	--	--	--	--	Q8GSA7	4777	0	Calmodulin-binding transcription activator 3 OS=Arabidopsis thaliana GN=CMTA3 PE=1 SV=1	PF13606//PF03859//PF00612//PF01833//PF00023	Ankyrin repeat//CG-1 domain//IQ calmodulin-binding motif//IPT/TIG domain//Ankyrin repeat	--	--	GO:0005515//GO:0003677	protein binding//DNA binding	GO:0005634	nucleus	KOG0520	Uncharacterized conserved protein, contains IPT/TIG domain	FALSE	Inf	1	FALSE	Inf	0.42095	FALSE	Inf	1	FALSE	Inf	0.14979
	2-3k.c7766/1/3035	0.0933333	0.123333	7.29333	9.26333	0.04	3.95333	3.40667	3055	297830306	XP_002883035.1	3871	0	calmodulin-binding protein [Arabidopsis lyrata subsp. lyrata]>gi|297328875|gb|EFH59294.1| calmodulin-binding protein [Arabidopsis lyrata subsp. lyrata]	334185402	NM_112570.3	1658	0	Arabidopsis thaliana calmodulin-binding transcription activator mRNA, complete cds	--	--	--	--	Q9LSP8	3195	0	Calmodulin-binding transcription activator 6 OS=Arabidopsis thaliana GN=CMTA6 PE=2 SV=1	PF01833//PF00023//PF03859//PF13606//PF00612	IPT/TIG domain//Ankyrin repeat//CG-1 domain//Ankyrin repeat//IQ calmodulin-binding motif	--	--	GO:0003677//GO:0005515	DNA binding//protein binding	GO:0005634	nucleus	--	--	FALSE	-1.1644	1	FALSE	5.173	0.081066	UP	6.6293	0.018366	FALSE	-7.5056	0.88764
	2-3k.c9826/2/3322	1.3	2.19667	0	3.78667	1.32333	0.0266667	0	3255	565457939	XP_006286969.1	4461	0	hypothetical protein CARUB_v10000120mg [Capsella rubella]>gi|482555675|gb|EOA19867.1| hypothetical protein CARUB_v10000120mg [Capsella rubella]	727493888	XM_010424684.1	2376	0	PREDICTED: Camelina sativa calmodulin-binding transcription activator 1 (LOC104708177), transcript variant X1, mRNA	--	--	--	--	Q9FY74	4373	0	Calmodulin-binding transcription activator 1 OS=Arabidopsis thaliana GN=CMTA1 PE=2 SV=2	PF03859//PF13606//PF00612//PF01833//PF00023	CG-1 domain//Ankyrin repeat//IQ calmodulin-binding motif//IPT/TIG domain//Ankyrin repeat	--	--	GO:0005515//GO:0003677	protein binding//DNA binding	GO:0005634	nucleus	KOG0520	Uncharacterized conserved protein, contains IPT/TIG domain	FALSE	NA	NA	FALSE	#NAME?	0.45923	FALSE	1.5049	0.40717	FALSE	Inf	0.8107
G2-like	1-2k.c14291/3/1801	19.9733	17.9467	7.67	6.41	4.59333	5.78333	4.37333	1770	297832658	XP_002884211.1	1388	3.8e-151	hypothetical protein ARALYDRAFT_480887 [Arabidopsis lyrata subsp. lyrata]>gi|297330051|gb|EFH60470.1| hypothetical protein ARALYDRAFT_480887 [Arabidopsis lyrata subsp. lyrata]	727589622	XM_010469496.1	764	0	PREDICTED: Camelina sativa transcription activator GLK1-like (LOC104747802), mRNA	--	--	--	--	Q9SIV3	1268	4.4e-138	Transcription activator GLK1 OS=Arabidopsis thaliana GN=GLK1 PE=1 SV=2	--	--	--	--	--	--	--	--	--	--	FALSE	-0.85403	1	FALSE	-2.2209	0.064088	FALSE	-1.5895	0.11309	FALSE	-0.72268	1
	1-2k.c18442/1/2007	4.9	3.93667	1.37333	1.34	0.866667	0.713333	0.603333	1984	727635831	XP_010489019.1	1289	1.3e-139	PREDICTED: transcription activator GLK1 [Camelina sativa]	727589622	XM_010469496.1	764	0	PREDICTED: Camelina sativa transcription activator GLK1-like (LOC104747802), mRNA	--	--	--	--	Q9SIV3	1268	4.9e-138	Transcription activator GLK1 OS=Arabidopsis thaliana GN=GLK1 PE=1 SV=2	--	--	--	--	--	--	--	--	--	--	FALSE	-1.2572	1	FALSE	-3.1356	0.076037	FALSE	-1.8231	0.32973	FALSE	-0.61399	1
	1-2k.c24251/1/1876	18.2433	26.9267	32.2933	50.7767	44.74	50.2133	36.7967	1841	565480064	XP_006297672.1	1761	2.2e-194	hypothetical protein CARUB_v10013698mg [Capsella rubella]>gi|482566381|gb|EOA30570.1| hypothetical protein CARUB_v10013698mg [Capsella rubella]	727413152	XM_010501537.1	1177	0	PREDICTED: Camelina sativa uncharacterized LOC104777295 (LOC104777295), transcript variant X4, mRNA	--	--	--	--	Q8GUN5	395	7.7e-37	Protein PHR1-LIKE 1 OS=Arabidopsis thaliana GN=PHL1 PE=1 SV=1	--	--	--	--	--	--	--	--	--	--	FALSE	0.14465	1	FALSE	1.0287	0.5694	UP	1.5747	0.043971	FALSE	0.49639	1
	1-2k.c2721/4/1690	81.7233	46.8133	29.1467	26.7067	20.0433	30.9733	23.96	1668	297832658	XP_002884211.1	1702	1.4e-187	hypothetical protein ARALYDRAFT_480887 [Arabidopsis lyrata subsp. lyrata]>gi|297330051|gb|EFH60470.1| hypothetical protein ARALYDRAFT_480887 [Arabidopsis lyrata subsp. lyrata]	727589622	XM_010469496.1	1073	0	PREDICTED: Camelina sativa transcription activator GLK1-like (LOC104747802), mRNA	--	--	--	--	Q9SIV3	1707	5.1e-189	Transcription activator GLK1 OS=Arabidopsis thaliana GN=GLK1 PE=1 SV=2	--	--	--	--	GO:0003682//GO:0003677	chromatin binding//DNA binding	GO:0000785	chromatin	--	--	FALSE	-0.32475	1	FALSE	-1.8254	0.079446	DOWN	-1.5771	0.035264	FALSE	-0.50629	1
	1-2k.c27450/10/1703	122.477	74.1733	37.86	31.8233	29.16	52.08	43.1033	1686	297832658	XP_002884211.1	1529	1.6e-167	hypothetical protein ARALYDRAFT_480887 [Arabidopsis lyrata subsp. lyrata]>gi|297330051|gb|EFH60470.1| hypothetical protein ARALYDRAFT_480887 [Arabidopsis lyrata subsp. lyrata]	727635830	XM_010490717.1	1099	0	PREDICTED: Camelina sativa transcription activator GLK1 (LOC104766769), mRNA	--	--	--	--	Q9SIV3	1526	5.1e-168	Transcription activator GLK1 OS=Arabidopsis thaliana GN=GLK1 PE=1 SV=2	--	--	--	--	GO:0005488	binding	--	--	--	--	FALSE	0.13785	1	FALSE	-1.5683	0.1544	DOWN	-1.911	0.025174	FALSE	-0.35341	1
	1-2k.c36810/1/1943	1.44333	0.44	0	0	1.32	0.69	0.396667	1941	15810171	AAL06987.1	2306	1.5e-257	AT3g16857/MUH15_1 [Arabidopsis thaliana]	297830297	XM_002882985.1	1245	0	Arabidopsis lyrata subsp. lyrata hypothetical protein, mRNA	K14491	ARR-B	two-component response regulator ARR-B family	http://www.genome.jp/dbget-bin/www_bget?ko:K14491	Q940D0	2314	2.5e-259	Two-component response regulator ARR1 OS=Arabidopsis thaliana GN=ARR1 PE=1 SV=2	PF03404	Mo-co oxidoreductase dimerisation domain	GO:0055114	oxidation-reduction process	GO:0030151//GO:0016491	molybdenum ion binding//oxidoreductase activity	--	--	--	--	FALSE	Inf	1	FALSE	-1.7475	0.93694	FALSE	#NAME?	0.2514	FALSE	Inf	0.14979
	1-2k.c4887/1/1764	8.83333	3.44	2.49667	1.73333	1.24	1.30667	0.926667	1756	297832658	XP_002884211.1	1352	5.6e-147	hypothetical protein ARALYDRAFT_480887 [Arabidopsis lyrata subsp. lyrata]>gi|297330051|gb|EFH60470.1| hypothetical protein ARALYDRAFT_480887 [Arabidopsis lyrata subsp. lyrata]	727635830	XM_010490717.1	834	0	PREDICTED: Camelina sativa transcription activator GLK1 (LOC104766769), mRNA	--	--	--	--	Q9SIV3	1345	5.1e-147	Transcription activator GLK1 OS=Arabidopsis thaliana GN=GLK1 PE=1 SV=2	--	--	--	--	GO:0005488	binding	--	--	--	--	FALSE	-1.4814	1	DOWN	-3.3716	0.027398	FALSE	-2.3271	0.1025	FALSE	-0.94639	1
	1-2k.c7673/1/1855	15.9567	11.91	4.98	4.59333	4.50333	5.92	4.73667	1822	727635831	XP_010489019.1	1105	2.6e-118	PREDICTED: transcription activator GLK1 [Camelina sativa]	727635830	XM_010490717.1	781	0	PREDICTED: Camelina sativa transcription activator GLK1 (LOC104766769), mRNA	--	--	--	--	Q9SIV3	1078	4.9e-116	Transcription activator GLK1 OS=Arabidopsis thaliana GN=GLK1 PE=1 SV=2	--	--	--	--	--	--	--	--	--	--	FALSE	-0.16353	1	FALSE	-1.8555	0.17387	FALSE	-1.7567	0.085723	FALSE	-0.12805	1
	2-3k.c4296/1/1558	21.8167	39.26	36.8233	17.7567	11.17	9.38333	14.7533	1557	565467174	XP_006291467.1	1138	3.3e-122	hypothetical protein CARUB_v10017603mg [Capsella rubella]>gi|565467176|ref|XP_006291468.1| hypothetical protein CARUB_v10017603mg [Capsella rubella]>gi|482560174|gb|EOA24365.1| hypothetical protein CARUB_v10017603mg [Capsella rubella]>gi|482560175|gb|EOA24366.1| hypothetical protein CARUB_v10017603mg [Capsella rubella]	565467175	XM_006291406.1	786	0	Capsella rubella hypothetical protein (CARUB_v10017603mg) mRNA, complete cds	--	--	--	--	Q9SNB4	1106	2.4e-119	Transcription factor LUX OS=Arabidopsis thaliana GN=LUX PE=1 SV=1	--	--	--	--	--	--	--	--	--	--	FALSE	-1.3091	1	FALSE	-0.48987	0.96431	FALSE	-0.18053	1	DOWN	-1.6919	0.030329
	3-6k.c12229/3/4155	1.18333	3.51333	2.85	6.23667	2.96333	7.81667	6.54	4165	727511641	XP_010432114.1	2575	2e-288	PREDICTED: protein misato homolog 1-like [Camelina sativa]	727511640	XM_010433812.1	1332	0	PREDICTED: Camelina sativa protein misato homolog 1-like (LOC104716436), mRNA	--	--	--	--	Q2YDW2	441	8.1e-42	Protein misato homolog 1 OS=Mus musculus GN=Msto1 PE=2 SV=1	PF00091//PF02072	Tubulin/FtsZ family, GTPase domain//Prepro-orexin	GO:0007218//GO:0007631	neuropeptide signaling pathway//feeding behavior	GO:0003924	GTPase activity	--	--	KOG2530	Members of tubulin/FtsZ family	FALSE	1.1636	1	FALSE	2.3608	0.15426	UP	2.3918	0.016601	FALSE	0.10051	1
	3-6k.c12739/1/4264.1	0	4.91	1.64	1.65333	3.4	0.243333	2.99667	2452	565443576	XP_006283840.1	1337	4.3e-145	hypothetical protein CARUB_v10004940mg, partial [Capsella rubella]>gi|482552545|gb|EOA16738.1| hypothetical protein CARUB_v10004940mg, partial [Capsella rubella]	565443575	XM_006283778.1	938	0	Capsella rubella hypothetical protein (CARUB_v10004940mg) mRNA, partial cds	--	--	--	--	Q9BUK6	174	4.4e-11	Protein misato homolog 1 OS=Homo sapiens GN=MSTO1 PE=1 SV=1	PF00091	Tubulin/FtsZ family, GTPase domain	--	--	GO:0003924	GTPase activity	--	--	--	--	FALSE	0.90466	1	UP	Inf	0.025475	UP	Inf	0.009285	FALSE	1.0119	1
	3-6k.c1525/14/4058	0	0	0	0	0	0	3.56	4059	727511641	XP_010432114.1	2575	2e-288	PREDICTED: protein misato homolog 1-like [Camelina sativa]	727511640	XM_010433812.1	1332	0	PREDICTED: Camelina sativa protein misato homolog 1-like (LOC104716436), mRNA	--	--	--	--	Q2YDW2	441	7.9e-42	Protein misato homolog 1 OS=Mus musculus GN=Msto1 PE=2 SV=1	PF02072//PF00091	Prepro-orexin//Tubulin/FtsZ family, GTPase domain	GO:0007631//GO:0007218	feeding behavior//neuropeptide signaling pathway	GO:0003924	GTPase activity	--	--	KOG2530	Members of tubulin/FtsZ family	UP	Inf	0.014292	UP	Inf	0.0017014	FALSE	NA	NA	FALSE	NA	NA
	3-6k.c16769/1/4014.1	13.2667	10.5467	9.87667	3.69333	2.83333	0.91	1.22667	2545	565467174	XP_006291467.1	1109	1.2e-118	hypothetical protein CARUB_v10017603mg [Capsella rubella]>gi|565467176|ref|XP_006291468.1| hypothetical protein CARUB_v10017603mg [Capsella rubella]>gi|482560174|gb|EOA24365.1| hypothetical protein CARUB_v10017603mg [Capsella rubella]>gi|482560175|gb|EOA24366.1| hypothetical protein CARUB_v10017603mg [Capsella rubella]	727466268	XM_010516687.1	821	0	PREDICTED: Camelina sativa transcription factor LUX (LOC104790887), transcript variant X1, mRNA	--	--	--	--	Q9SNB4	1086	8e-117	Transcription factor LUX OS=Arabidopsis thaliana GN=LUX PE=1 SV=1	PF04101//PF00201	Glycosyltransferase family 28 C-terminal domain//UDP-glucoronosyl and UDP-glucosyl transferase	GO:0008152	metabolic process	GO:0016758	transferase activity, transferring hexosyl groups	--	--	--	--	FALSE	-3.0061	0.14427	DOWN	-3.4274	0.0017368	FALSE	-1.7276	0.065424	FALSE	-1.7324	0.47168
	3-6k.c5127/2/4053.1	4.99333	2.91333	7.17667	12.74	19.3067	19.4233	19.2067	1984	297834112	XP_002884938.1	1706	5.7e-188	hypothetical protein ARALYDRAFT_478672 [Arabidopsis lyrata subsp. lyrata]>gi|297330778|gb|EFH61197.1| hypothetical protein ARALYDRAFT_478672 [Arabidopsis lyrata subsp. lyrata]	727413152	XM_010501537.1	1161	0	PREDICTED: Camelina sativa uncharacterized LOC104777295 (LOC104777295), transcript variant X4, mRNA	--	--	--	--	Q8GUN5	383	2.1e-35	Protein PHR1-LIKE 1 OS=Arabidopsis thaliana GN=PHL1 PE=1 SV=1	--	--	--	--	GO:0003677//GO:0003682	DNA binding//chromatin binding	GO:0000785	chromatin	--	--	FALSE	1.3961	1	FALSE	1.9411	0.12201	FALSE	1.4406	0.22906	FALSE	1.471	0.16431
	3-6k.c7949/2/4069	0.06	0.07	0.186667	0.376667	0.62	0.603333	1.53667	4051	727511641	XP_010432114.1	2575	2e-288	PREDICTED: protein misato homolog 1-like [Camelina sativa]	727511640	XM_010433812.1	1328	0	PREDICTED: Camelina sativa protein misato homolog 1-like (LOC104716436), mRNA	--	--	--	--	Q2YDW2	441	7.9e-42	Protein misato homolog 1 OS=Mus musculus GN=Msto1 PE=2 SV=1	PF00091//PF02072	Tubulin/FtsZ family, GTPase domain//Prepro-orexin	GO:0007218//GO:0007631	neuropeptide signaling pathway//feeding behavior	GO:0003924	GTPase activity	--	--	KOG2530	Members of tubulin/FtsZ family	FALSE	2.9705	0.83515	UP	4.8219	0.025917	FALSE	2.8622	0.79309	FALSE	1.7513	1
SNF2	1-2k.c15776/1/2039	0.513333	0.833333	0.35	0.993333	0	1.11667	1.59667	2036	727613151	XP_010479492.1	2647	4.5e-297	PREDICTED: uncharacterized ATP-dependent helicase C23E6.02-like [Camelina sativa]>gi|727613157|ref|XP_010479494.1| PREDICTED: uncharacterized ATP-dependent helicase C23E6.02-like [Camelina sativa]>gi|727613164|ref|XP_010479495.1| PREDICTED: uncharacterized ATP-dependent helicase C23E6.02-like [Camelina sativa]>gi|727613170|ref|XP_010479496.1| PREDICTED: uncharacterized ATP-dependent helicase C23E…	18403060	NM_103924.1	1370	0	Arabidopsis thaliana SNF2 and helicase domain-containing protein mRNA, complete cds	--	--	--	--	O13762	730	1.2e-75	Uncharacterized ATP-dependent helicase C17A2.12 OS=Schizosaccharomyces pombe (strain 972 / ATCC 24843) GN=SPAC17A2.12 PE=3 SV=1	PF13639//PF12861//PF00097//PF05793//PF12678//PF14634//PF01056//PF00176	Ring finger domain//Anaphase-promoting complex subunit 11 RING-H2 finger//Zinc finger, C3HC4 type (RING finger)//Transcription initiation factor IIF, alpha subunit (TFIIF-alpha)//RING-H2 zinc finger//zinc-RING finger domain//Myc amino-terminal region//SNF2 family N-terminal domain	GO:0006367//GO:0016567//GO:0032968//GO:0006355	transcription initiation from RNA polymerase II promoter//protein ubiquitination//positive regulation of transcription elongation from RNA polymerase II promoter//regulation of transcription, DNA-templated	GO:0003677//GO:0046872//GO:0005524//GO:0005515//GO:0008270//GO:0004842//GO:0003700	DNA binding//metal ion binding//ATP binding//protein binding//zinc ion binding//ubiquitin-protein transferase activity//transcription factor activity, sequence-specific DNA binding	GO:0005634//GO:0005667//GO:0005680	nucleus//transcription factor complex//anaphase-promoting complex	KOG1001	Helicase-like transcription factor HLTF/DNA helicase RAD5, DEAD-box superfamily	FALSE	2.1535	1	FALSE	1.9009	0.76234	FALSE	1.1595	1	FALSE	#NAME?	1
	2-3k.c10437/1/2872	0.293333	1.04667	1.64	0.383333	0	1.61667	2.57333	2873	565483612	XP_006299446.1	3733	0	hypothetical protein CARUB_v10015610mg [Capsella rubella]>gi|482568155|gb|EOA32344.1| hypothetical protein CARUB_v10015610mg [Capsella rubella]	727630228	XM_010487780.1	2207	0	PREDICTED: Camelina sativa probable ATP-dependent DNA helicase CHR12 (LOC104764283), mRNA	K11647	SMARCA2_4	SWI/SNF-related matrix-associated actin-dependent regulator of chromatin subfamily A member 2/4	http://www.genome.jp/dbget-bin/www_bget?ko:K11647	F4J9M5	3703	0	Probable ATP-dependent DNA helicase CHR12 OS=Arabidopsis thaliana GN=CHR12 PE=2 SV=1	PF14619//PF04851//PF00176	Snf2-ATP coupling, chromatin remodelling complex//Type III restriction enzyme, res subunit//SNF2 family N-terminal domain	--	--	GO:0003677//GO:0016787//GO:0042393//GO:0005524	DNA binding//hydrolase activity//histone binding//ATP binding	--	--	KOG0386	Chromatin remodeling complex SWI/SNF, component SWI2 and related ATPases (DNA/RNA helicase superfamily)	FALSE	0.77089	1	FALSE	3.1591	0.25893	FALSE	0.39246	1	FALSE	#NAME?	0.42281
	2-3k.c1577/3/3139	14.39	21.26	18.4533	24.47	10.1767	5.56667	2.88333	3061	727570142	XP_010457587.1	929	1.1e-97	PREDICTED: DNA repair protein RAD16-like [Camelina sativa]	727429714	XM_010482849.1	738	0	PREDICTED: Camelina sativa ATP-dependent helicase rhp16-like (LOC104759988), transcript variant X1, mRNA	K15083	RAD16	DNA repair protein RAD16	http://www.genome.jp/dbget-bin/www_bget?ko:K15083	P79051	402	2e-37	ATP-dependent helicase rhp16 OS=Schizosaccharomyces pombe (strain 972 / ATCC 24843) GN=rhp16 PE=3 SV=2	PF04769//PF01363//PF00176//PF00097//PF13639//PF14634//PF04851	Mating-type protein MAT alpha 1 HMG-box//FYVE zinc finger//SNF2 family N-terminal domain//Zinc finger, C3HC4 type (RING finger)//Ring finger domain//zinc-RING finger domain//Type III restriction enzyme, res subunit	GO:0007531//GO:0045895	mating type determination//positive regulation of mating-type specific transcription, DNA-templated	GO:0008301//GO:0003677//GO:0016787//GO:0008270//GO:0005524//GO:0005515//GO:0046872	DNA binding, bending//DNA binding//hydrolase activity//zinc ion binding//ATP binding//protein binding//metal ion binding	GO:0005634	nucleus	KOG1002	Nucleotide excision repair protein RAD16	FALSE	-2.7342	0.1173	FALSE	-2.4227	0.26573	FALSE	0.76454	0.55169	FALSE	-0.83394	0.71179
	2-3k.c3904/1/3418	10.45	7.86667	3.55667	3.56	9.10667	0.13	0.0366667	3479	297824661	XP_002880213.1	5119	0	ATBRM/CHR2 [Arabidopsis lyrata subsp. lyrata]>gi|297326052|gb|EFH56472.1| ATBRM/CHR2 [Arabidopsis lyrata subsp. lyrata]	727452526	XM_010509774.1	2938	0	PREDICTED: Camelina sativa ATP-dependent helicase BRM-like (LOC104784715), mRNA	K11647	SMARCA2_4	SWI/SNF-related matrix-associated actin-dependent regulator of chromatin subfamily A member 2/4	http://www.genome.jp/dbget-bin/www_bget?ko:K11647	Q6EVK6	5107	0	ATP-dependent helicase BRM OS=Arabidopsis thaliana GN=BRM PE=1 SV=1	PF00176//PF00439	SNF2 family N-terminal domain//Bromodomain	GO:0006355	regulation of transcription, DNA-templated	GO:0003677//GO:0005524//GO:0005515//GO:0004386	DNA binding//ATP binding//protein binding//helicase activity	GO:0005634	nucleus	KOG0386	Chromatin remodeling complex SWI/SNF, component SWI2 and related ATPases (DNA/RNA helicase superfamily)	FALSE	-6.6799	1	DOWN	-8.2129	2.7826e-11	FALSE	-1.4148	0.45465	FALSE	1.3758	0.91086
	2-3k.c4216/1/2952	8.63333	13.53	10.2733	12.5367	5.39667	3.00667	1.37333	2929	727570142	XP_010457587.1	929	1.1e-97	PREDICTED: DNA repair protein RAD16-like [Camelina sativa]	727429714	XM_010482849.1	738	0	PREDICTED: Camelina sativa ATP-dependent helicase rhp16-like (LOC104759988), transcript variant X1, mRNA	K15083	RAD16	DNA repair protein RAD16	http://www.genome.jp/dbget-bin/www_bget?ko:K15083	P31244	488	2e-47	DNA repair protein RAD16 OS=Saccharomyces cerevisiae (strain ATCC 204508 / S288c) GN=RAD16 PE=1 SV=1	PF04851//PF14634//PF13639//PF00097//PF00176//PF01363//PF04769	Type III restriction enzyme, res subunit//zinc-RING finger domain//Ring finger domain//Zinc finger, C3HC4 type (RING finger)//SNF2 family N-terminal domain//FYVE zinc finger//Mating-type protein MAT alpha 1 HMG-box	GO:0045895//GO:0007531	positive regulation of mating-type specific transcription, DNA-templated//mating type determination	GO:0005524//GO:0005515//GO:0046872//GO:0008270//GO:0016787//GO:0003677//GO:0008301	ATP binding//protein binding//metal ion binding//zinc ion binding//hydrolase activity//DNA binding//DNA binding, bending	GO:0005634	nucleus	KOG1002	Nucleotide excision repair protein RAD16	FALSE	-2.993	0.14156	FALSE	-2.7876	0.27441	FALSE	0.53361	0.91656	FALSE	-0.91014	0.83909
	2-3k.c6699/1/3188	0.996667	0	1.10333	2.56	0	0.953333	1.20333	3190	727452527	XP_010508076.1	4608	0	PREDICTED: ATP-dependent helicase BRM-like [Camelina sativa]	727452526	XM_010509774.1	2693	0	PREDICTED: Camelina sativa ATP-dependent helicase BRM-like (LOC104784715), mRNA	K11647	SMARCA2_4	SWI/SNF-related matrix-associated actin-dependent regulator of chromatin subfamily A member 2/4	http://www.genome.jp/dbget-bin/www_bget?ko:K11647	Q6EVK6	4591	0	ATP-dependent helicase BRM OS=Arabidopsis thaliana GN=BRM PE=1 SV=1	PF00176	SNF2 family N-terminal domain	--	--	GO:0005524	ATP binding	--	--	KOG0386	Chromatin remodeling complex SWI/SNF, component SWI2 and related ATPases (DNA/RNA helicase superfamily)	FALSE	0.028839	1	FALSE	0.20627	1	FALSE	1.3384	0.91638	FALSE	#NAME?	0.77038
	3-6k.c14191/1/4728	0.106667	1.66333	3.87667	8.17667	0.183333	7.25667	6.30333	4722	297824661	XP_002880213.1	6809	0	ATBRM/CHR2 [Arabidopsis lyrata subsp. lyrata]>gi|297326052|gb|EFH56472.1| ATBRM/CHR2 [Arabidopsis lyrata subsp. lyrata]	145362204	NM_201966.2	3931	0	Arabidopsis thaliana ATP-dependent helicase BRAHMA mRNA, complete cds >gnl|BL_ORD_ID|1249869 Arabidopsis thaliana mRNA for putative SNF2 subfamily ATPase (brm gene)	K11647	SMARCA2_4	SWI/SNF-related matrix-associated actin-dependent regulator of chromatin subfamily A member 2/4	http://www.genome.jp/dbget-bin/www_bget?ko:K11647	Q6EVK6	6807	0	ATP-dependent helicase BRM OS=Arabidopsis thaliana GN=BRM PE=1 SV=1	PF04851//PF00270//PF00176	Type III restriction enzyme, res subunit//DEAD/DEAH box helicase//SNF2 family N-terminal domain	GO:0006355	regulation of transcription, DNA-templated	GO:0004386//GO:0003676//GO:0005524//GO:0003677//GO:0016787	helicase activity//nucleic acid binding//ATP binding//DNA binding//hydrolase activity	GO:0005634	nucleus	KOG0386	Chromatin remodeling complex SWI/SNF, component SWI2 and related ATPases (DNA/RNA helicase superfamily)	FALSE	0.68855	1	UP	5.836	0.0435	UP	6.1698	0.021663	FALSE	-4.4645	1
	3-6k.c20351/1/4492	1.63	0.493333	1.63	0.563333	3.42667	1.71333	1.79	4600	727484361	XP_010418063.1	5526	0	PREDICTED: uncharacterized protein LOC104703704 isoform X1 [Camelina sativa]	727484360	XM_010419761.1	3072	0	PREDICTED: Camelina sativa putative SWI/SNF-related matrix-associated actin-dependent regulator of chromatin subfamily A member 3-like 1 (LOC104703704), transcript variant X1, mRNA	--	--	--	--	O60177	826	2e-86	Uncharacterized ATP-dependent helicase C23E6.02 OS=Schizosaccharomyces pombe (strain 972 / ATCC 24843) GN=SPBC23E6.02 PE=3 SV=1	PF14634//PF17121//PF03139//PF00176//PF13639//PF00097//PF04281//PF12678	zinc-RING finger domain//Zinc finger, C3HC4 type (RING finger)//Vanadium/alternative nitrogenase delta subunit//SNF2 family N-terminal domain//Ring finger domain//Zinc finger, C3HC4 type (RING finger)//Mitochondrial import receptor subunit Tom22//RING-H2 zinc finger	GO:0055114//GO:0006807//GO:0006886//GO:0019337//GO:0009399	oxidation-reduction process//nitrogen compound metabolic process//intracellular protein transport//tetrachloroethylene catabolic process//nitrogen fixation	GO:0005515//GO:0046872//GO:0005524//GO:0008270//GO:0016163	protein binding//metal ion binding//ATP binding//zinc ion binding//nitrogenase activity	GO:0005741//GO:0016610	mitochondrial outer membrane//nitrogenase complex	--	--	FALSE	0.12508	1	FALSE	0.074338	1	FALSE	-1.4508	0.57722	FALSE	1.1774	0.90697
	3-6k.c21669/1/3601	0	3.16	2.62	1.87667	2.72333	1.55333	3.09667	3591	565483612	XP_006299446.1	4617	0	hypothetical protein CARUB_v10015610mg [Capsella rubella]>gi|482568155|gb|EOA32344.1| hypothetical protein CARUB_v10015610mg [Capsella rubella]	334185117	NM_111475.2	2779	0	Arabidopsis thaliana SNF2/Brahma-type chromatin-remodeling protein CHR12 mRNA, complete cds	K11647	SMARCA2_4	SWI/SNF-related matrix-associated actin-dependent regulator of chromatin subfamily A member 2/4	http://www.genome.jp/dbget-bin/www_bget?ko:K11647	F4J9M5	4589	0	Probable ATP-dependent DNA helicase CHR12 OS=Arabidopsis thaliana GN=CHR12 PE=2 SV=1	PF04851//PF14619//PF00176	Type III restriction enzyme, res subunit//Snf2-ATP coupling, chromatin remodelling complex//SNF2 family N-terminal domain	--	--	GO:0005524//GO:0003677//GO:0042393//GO:0016787	ATP binding//DNA binding//histone binding//hydrolase activity	--	--	KOG0386	Chromatin remodeling complex SWI/SNF, component SWI2 and related ATPases (DNA/RNA helicase superfamily)	FALSE	0.24924	1	UP	Inf	1.7799e-05	FALSE	Inf	0.30026	FALSE	0.1375	1
	3-6k.c2398/3/4640	0.92	1.67333	2.36	0	0.23	0.79	0	4642	297824661	XP_002880213.1	6857	0	ATBRM/CHR2 [Arabidopsis lyrata subsp. lyrata]>gi|297326052|gb|EFH56472.1| ATBRM/CHR2 [Arabidopsis lyrata subsp. lyrata]	145362204	NM_201966.2	3952	0	Arabidopsis thaliana ATP-dependent helicase BRAHMA mRNA, complete cds >gnl|BL_ORD_ID|1249869 Arabidopsis thaliana mRNA for putative SNF2 subfamily ATPase (brm gene)	K11647	SMARCA2_4	SWI/SNF-related matrix-associated actin-dependent regulator of chromatin subfamily A member 2/4	http://www.genome.jp/dbget-bin/www_bget?ko:K11647	Q6EVK6	6855	0	ATP-dependent helicase BRM OS=Arabidopsis thaliana GN=BRM PE=1 SV=1	PF04851//PF00176//PF00270	Type III restriction enzyme, res subunit//SNF2 family N-terminal domain//DEAD/DEAH box helicase	GO:0006355	regulation of transcription, DNA-templated	GO:0003677//GO:0016787//GO:0004386//GO:0005524//GO:0003676	DNA binding//hydrolase activity//helicase activity//ATP binding//nucleic acid binding	GO:0005634	nucleus	KOG0386	Chromatin remodeling complex SWI/SNF, component SWI2 and related ATPases (DNA/RNA helicase superfamily)	FALSE	#NAME?	1	FALSE	#NAME?	0.087461	FALSE	#NAME?	0.074492	FALSE	-3.2098	1
	3-6k.c2501/2/4756	8.28333	3.52667	5.12	0.796667	4.8	5.16333	4.44333	4737	727431399	XP_010489091.1	6145	0	PREDICTED: protein CHROMATIN REMODELING 20-like isoform X1 [Camelina sativa]>gi|727431401|ref|XP_010489095.1| PREDICTED: protein CHROMATIN REMODELING 20-like isoform X1 [Camelina sativa]>gi|727431403|ref|XP_010489102.1| PREDICTED: protein CHROMATIN REMODELING 20-like isoform X2 [Camelina sativa]	727571112	XM_010459801.1	3453	0	PREDICTED: Camelina sativa protein CHROMATIN REMODELING 20 (LOC104739453), mRNA	K10779	ATRX	transcriptional regulator ATRX	http://www.genome.jp/dbget-bin/www_bget?ko:K10779	F4HW51	5890	0	Protein CHROMATIN REMODELING 20 OS=Arabidopsis thaliana GN=ATRX PE=2 SV=2	PF00176//PF04851//PF08054//PF15761//PF08651	SNF2 family N-terminal domain//Type III restriction enzyme, res subunit//Leucine operon leader peptide//Immortalisation up-regulated protein//DASH complex subunit Duo1	GO:0007067//GO:0009098	mitotic nuclear division//leucine biosynthetic process	GO:0016787//GO:0005524//GO:0003677	hydrolase activity//ATP binding//DNA binding	GO:0072686//GO:0042729//GO:0005634	mitotic spindle//DASH complex//nucleus	KOG1015	Transcription regulator XNP/ATRX, DEAD-box superfamily	FALSE	-0.29759	1	FALSE	-1.0127	0.58456	DOWN	-3.2753	5.4327e-05	FALSE	-0.026591	1
	3-6k.c8603/1/3515	0.0166667	0	3.42	2.21333	0	2.66667	3.34	3509	297824661	XP_002880213.1	5050	0	ATBRM/CHR2 [Arabidopsis lyrata subsp. lyrata]>gi|297326052|gb|EFH56472.1| ATBRM/CHR2 [Arabidopsis lyrata subsp. lyrata]	727452526	XM_010509774.1	2926	0	PREDICTED: Camelina sativa ATP-dependent helicase BRM-like (LOC104784715), mRNA	K11647	SMARCA2_4	SWI/SNF-related matrix-associated actin-dependent regulator of chromatin subfamily A member 2/4	http://www.genome.jp/dbget-bin/www_bget?ko:K11647	Q6EVK6	5038	0	ATP-dependent helicase BRM OS=Arabidopsis thaliana GN=BRM PE=1 SV=1	PF00176//PF00439	SNF2 family N-terminal domain//Bromodomain	GO:0006355	regulation of transcription, DNA-templated	GO:0004386//GO:0005515//GO:0005524//GO:0003677	helicase activity//protein binding//ATP binding//DNA binding	GO:0005634	nucleus	KOG0386	Chromatin remodeling complex SWI/SNF, component SWI2 and related ATPases (DNA/RNA helicase superfamily)	FALSE	-0.068165	1	UP	7.2081	2.0435e-05	FALSE	6.6771	0.15399	DOWN	#NAME?	0.0082815
	3-6k.c8689/1/4535	0	1.10333	0	0.493333	0	0.206667	0	4484	727484361	XP_010418063.1	5522	0	PREDICTED: uncharacterized protein LOC104703704 isoform X1 [Camelina sativa]	727484360	XM_010419761.1	3018	0	PREDICTED: Camelina sativa putative SWI/SNF-related matrix-associated actin-dependent regulator of chromatin subfamily A member 3-like 1 (LOC104703704), transcript variant X1, mRNA	--	--	--	--	O60177	826	2e-86	Uncharacterized ATP-dependent helicase C23E6.02 OS=Schizosaccharomyces pombe (strain 972 / ATCC 24843) GN=SPBC23E6.02 PE=3 SV=1	PF00097//PF13639//PF04281//PF12678//PF17121//PF14634//PF03139//PF00176	Zinc finger, C3HC4 type (RING finger)//Ring finger domain//Mitochondrial import receptor subunit Tom22//RING-H2 zinc finger//Zinc finger, C3HC4 type (RING finger)//zinc-RING finger domain//Vanadium/alternative nitrogenase delta subunit//SNF2 family N-terminal domain	GO:0055114//GO:0006807//GO:0019337//GO:0009399//GO:0006886	oxidation-reduction process//nitrogen compound metabolic process//tetrachloroethylene catabolic process//nitrogen fixation//intracellular protein transport	GO:0016163//GO:0008270//GO:0005515//GO:0046872//GO:0005524	nitrogenase activity//zinc ion binding//protein binding//metal ion binding//ATP binding	GO:0005741//GO:0016610	mitochondrial outer membrane//nitrogenase complex	KOG1001	Helicase-like transcription factor HLTF/DNA helicase RAD5, DEAD-box superfamily	FALSE	NA	NA	FALSE	NA	NA	UP	Inf	0.045428	FALSE	NA	NA
	3-6k.c9208/2/4673	0.0566667	1.44	1.98	5.50333	1.46333	1.71667	1.94	4632	727431399	XP_010489091.1	6145	0	PREDICTED: protein CHROMATIN REMODELING 20-like isoform X1 [Camelina sativa]>gi|727431401|ref|XP_010489095.1| PREDICTED: protein CHROMATIN REMODELING 20-like isoform X1 [Camelina sativa]>gi|727431403|ref|XP_010489102.1| PREDICTED: protein CHROMATIN REMODELING 20-like isoform X2 [Camelina sativa]	727571112	XM_010459801.1	3453	0	PREDICTED: Camelina sativa protein CHROMATIN REMODELING 20 (LOC104739453), mRNA	K10779	ATRX	transcriptional regulator ATRX	http://www.genome.jp/dbget-bin/www_bget?ko:K10779	F4HW51	5890	0	Protein CHROMATIN REMODELING 20 OS=Arabidopsis thaliana GN=ATRX PE=2 SV=2	PF00176//PF08054//PF04851//PF08651//PF15761	SNF2 family N-terminal domain//Leucine operon leader peptide//Type III restriction enzyme, res subunit//DASH complex subunit Duo1//Immortalisation up-regulated protein	GO:0009098//GO:0007067	leucine biosynthetic process//mitotic nuclear division	GO:0003677//GO:0016787//GO:0005524	DNA binding//hydrolase activity//ATP binding	GO:0042729//GO:0005634//GO:0072686	DASH complex//nucleus//mitotic spindle	KOG1015	Transcription regulator XNP/ATRX, DEAD-box superfamily	FALSE	0.010166	1	FALSE	5.3838	0.12436	UP	6.837	2.2929e-11	FALSE	-0.42343	1
AP2-EREBP	1-2k.c16745/1/2438.1	19.2933	35.54	63.8167	71.92	68.44	86.72	104.727	724	727641486	XP_010492081.1	565	4.2e-56	PREDICTED: ethylene-responsive transcription factor ERF113-like [Camelina sativa]	297807356	XM_002871516.1	509	0	Arabidopsis lyrata subsp. lyrata hypothetical protein, mRNA	--	--	--	--	Q9LYU3	536	1.4e-53	Ethylene-responsive transcription factor ERF113 OS=Arabidopsis thaliana GN=ERF113 PE=2 SV=1	PF00847	AP2 domain	GO:0006355	regulation of transcription, DNA-templated	GO:0003700	transcription factor activity, sequence-specific DNA binding	GO:0005667	transcription factor complex	--	--	FALSE	0.69985	1	FALSE	2.5034	0.1409	UP	1.9867	0.021867	FALSE	0.088564	1
	1-2k.c24768/1/1041	55.7033	78.46	91.88	82.7567	37.6533	15.0067	13.88	1055	727507515	XP_010429874.1	1205	3.8e-130	PREDICTED: AP2-like ethylene-responsive transcription factor At1g79700 [Camelina sativa]	727507514	XM_010431572.1	760	0	PREDICTED: Camelina sativa AP2-like ethylene-responsive transcription factor At1g79700 (LOC104714269), mRNA	K09285	OVM, ANT	AP2-like factor, ANT lineage	http://www.genome.jp/dbget-bin/www_bget?ko:K09285	A0JPZ8	1103	3.5e-119	AP2-like ethylene-responsive transcription factor At1g79700 OS=Arabidopsis thaliana GN=At1g79700 PE=2 SV=1	PF00847	AP2 domain	GO:0006355	regulation of transcription, DNA-templated	GO:0003700	transcription factor activity, sequence-specific DNA binding	GO:0005667	transcription factor complex	--	--	FALSE	-2.7728	0.08633	FALSE	-2.041	0.081367	FALSE	0.61586	0.76357	FALSE	-1.2699	0.17371
	1-2k.c27506/13/1789	0	2.03333	37.3233	66.0733	0	53.6533	60.5467	1756	297839671	XP_002887717.1	1007	5.7e-107	hypothetical protein ARALYDRAFT_476975 [Arabidopsis lyrata subsp. lyrata]>gi|297333558|gb|EFH63976.1| hypothetical protein ARALYDRAFT_476975 [Arabidopsis lyrata subsp. lyrata]	332189094	CP002684.1	938	0	Arabidopsis thaliana chromosome 1 sequence	K09286	EREBP	EREBP-like factor	http://www.genome.jp/dbget-bin/www_bget?ko:K09286	Q8H1E4	1004	1.8e-107	Ethylene-responsive transcription factor RAP2-4 OS=Arabidopsis thaliana GN=RAP2-4 PE=1 SV=1	PF00847	AP2 domain	GO:0006355	regulation of transcription, DNA-templated	GO:0003700	transcription factor activity, sequence-specific DNA binding	GO:0005667	transcription factor complex	--	--	FALSE	0.65396	1	UP	Inf	8.514e-05	UP	Inf	8.0982e-05	FALSE	#NAME?	0.45419
	1-2k.c28219/2/1648	51.4333	49.7533	32.65	15	30.98	5.96667	8.58333	1649	297839671	XP_002887717.1	1007	5.4e-107	hypothetical protein ARALYDRAFT_476975 [Arabidopsis lyrata subsp. lyrata]>gi|297333558|gb|EFH63976.1| hypothetical protein ARALYDRAFT_476975 [Arabidopsis lyrata subsp. lyrata]	727598082	XM_010473707.1	848	0	PREDICTED: Camelina sativa ethylene-responsive transcription factor RAP2-4-like (LOC104751702), mRNA	K09286	EREBP	EREBP-like factor	http://www.genome.jp/dbget-bin/www_bget?ko:K09286	Q8H1E4	1004	1.7e-107	Ethylene-responsive transcription factor RAP2-4 OS=Arabidopsis thaliana GN=RAP2-4 PE=1 SV=1	PF00847	AP2 domain	GO:0006355	regulation of transcription, DNA-templated	GO:0003700	transcription factor activity, sequence-specific DNA binding	GO:0005667	transcription factor complex	--	--	FALSE	-2.0688	1	DOWN	-2.7923	0.0078831	FALSE	-1.6898	0.43224	FALSE	-0.022232	1
	1-2k.c31906/1/1848	43.81	56.8867	39.4833	22.12	56.43	14.7333	13.8	1858	297839671	XP_002887717.1	1007	6e-107	hypothetical protein ARALYDRAFT_476975 [Arabidopsis lyrata subsp. lyrata]>gi|297333558|gb|EFH63976.1| hypothetical protein ARALYDRAFT_476975 [Arabidopsis lyrata subsp. lyrata]	332189094	CP002684.1	938	0	Arabidopsis thaliana chromosome 1 sequence	K09286	EREBP	EREBP-like factor	http://www.genome.jp/dbget-bin/www_bget?ko:K09286	Q8H1E4	1004	1.9e-107	Ethylene-responsive transcription factor RAP2-4 OS=Arabidopsis thaliana GN=RAP2-4 PE=1 SV=1	PF00847	AP2 domain	GO:0006355	regulation of transcription, DNA-templated	GO:0003700	transcription factor activity, sequence-specific DNA binding	GO:0005667	transcription factor complex	--	--	FALSE	-1.6107	1	FALSE	-1.8115	0.072912	FALSE	-0.88967	0.97637	FALSE	0.57258	1
	1-2k.c37179/1/1876.1	17.0467	32.8167	58.42	68.4533	62.2433	79.64	93.37	849	727641486	XP_010492081.1	527	1.3e-51	PREDICTED: ethylene-responsive transcription factor ERF113-like [Camelina sativa]	297807356	XM_002871516.1	497	0	Arabidopsis lyrata subsp. lyrata hypothetical protein, mRNA	--	--	--	--	Q9LYU3	498	4.1e-49	Ethylene-responsive transcription factor ERF113 OS=Arabidopsis thaliana GN=ERF113 PE=2 SV=1	--	--	--	--	--	--	--	--	--	--	FALSE	0.66406	1	FALSE	2.5102	0.17867	UP	2.0767	0.010438	FALSE	0.075811	1
	1-2k.c5422/1/2436	1.21667	0.78	1.47333	1.75333	5.68	8.44	13.49	1720	565486379	XP_006300829.1	942	1.9e-99	hypothetical protein CARUB_v10019921mg [Capsella rubella]>gi|482569539|gb|EOA33727.1| hypothetical protein CARUB_v10019921mg [Capsella rubella]	42469914	BX815317.1	782	0	Arabidopsis thaliana Full-length cDNA Complete sequence from clone GSLTLS51ZC09 of Adult vegetative tissue of strain col-0 of Arabidopsis thaliana (thale cress)	--	--	--	--	Q9C9I8	612	5e-62	Ethylene-responsive transcription factor ERF020 OS=Arabidopsis thaliana GN=ERF020 PE=2 SV=1	PF00847//PF00069	AP2 domain//Protein kinase domain	GO:0006355//GO:0006468	regulation of transcription, DNA-templated//protein phosphorylation	GO:0005524//GO:0004672//GO:0003700	ATP binding//protein kinase activity//transcription factor activity, sequence-specific DNA binding	GO:0005667	transcription factor complex	--	--	FALSE	3.2218	0.66591	FALSE	3.548	0.1604	FALSE	0.62151	1	FALSE	1.9514	0.53005
	1-2k.c585/47/1712	147.447	179.3	115.973	118.67	60.49	160.233	131.143	1711	727632371	XP_010487223.1	1583	9e-174	PREDICTED: ethylene-responsive transcription factor RAP2-2-like [Camelina sativa]	727632370	XM_010488921.1	1164	0	PREDICTED: Camelina sativa ethylene-responsive transcription factor RAP2-2-like (LOC104765237), mRNA	K09286	EREBP	EREBP-like factor	http://www.genome.jp/dbget-bin/www_bget?ko:K09286	Q9LUM4	1459	3e-160	Ethylene-responsive transcription factor RAP2-2 OS=Arabidopsis thaliana GN=RAP2-2 PE=1 SV=2	PF00847	AP2 domain	GO:0006355	regulation of transcription, DNA-templated	GO:0003700	transcription factor activity, sequence-specific DNA binding	GO:0005667	transcription factor complex	--	--	FALSE	0.19135	1	FALSE	-0.12801	1	FALSE	-0.22811	1	FALSE	-0.89094	0.38156
	1-2k.c8080/1/1642	83.3167	39.22	19.26	8.07333	4.07333	17.5033	12.83	1431	727606493	XP_010476321.1	1575	6.4e-173	PREDICTED: AP2/ERF and B3 domain-containing transcription factor RAV1 [Camelina sativa]	332189094	CP002684.1	988	0	Arabidopsis thaliana chromosome 1 sequence	K09287	RAV	RAV-like factor	http://www.genome.jp/dbget-bin/www_bget?ko:K09287	Q9ZWM9	1556	1.4e-171	AP2/ERF and B3 domain-containing transcription factor RAV1 OS=Arabidopsis thaliana GN=RAV1 PE=1 SV=1	PF00847//PF02362//PF01015	AP2 domain//B3 DNA binding domain//Ribosomal S3Ae family	GO:0006355//GO:0042254//GO:0006412	regulation of transcription, DNA-templated//ribosome biogenesis//translation	GO:0003700//GO:0003735//GO:0003677	transcription factor activity, sequence-specific DNA binding//structural constituent of ribosome//DNA binding	GO:0005840//GO:0005622//GO:0005667	ribosome//intracellular//transcription factor complex	--	--	FALSE	-0.6056	1	DOWN	-2.6976	0.0040496	DOWN	-3.2716	1.2974e-06	FALSE	-2.2008	0.70167
	2-3k.c13802/1/1282	114.733	66.6533	56.83	33.42	12.5867	32.4533	24.15	1284	727606493	XP_010476321.1	1549	5.9e-170	PREDICTED: AP2/ERF and B3 domain-containing transcription factor RAV1 [Camelina sativa]	727606492	XM_010478019.1	892	0	PREDICTED: Camelina sativa AP2/ERF and B3 domain-containing transcription factor RAV1 (LOC104755609), mRNA	K09287	RAV	RAV-like factor	http://www.genome.jp/dbget-bin/www_bget?ko:K09287	Q9ZWM9	1526	3.8e-168	AP2/ERF and B3 domain-containing transcription factor RAV1 OS=Arabidopsis thaliana GN=RAV1 PE=1 SV=1	PF02362//PF00847	B3 DNA binding domain//AP2 domain	GO:0006355	regulation of transcription, DNA-templated	GO:0003700//GO:0003677	transcription factor activity, sequence-specific DNA binding//DNA binding	GO:0005667	transcription factor complex	--	--	FALSE	-1.255	1	FALSE	-2.3024	0.053644	FALSE	-1.7411	0.14649	FALSE	-2.138	0.077793
	2-3k.c14310/1/2892	7.82667	6.12667	3.78667	2.60333	1.18667	2.03333	1.67667	2890	297802928	XP_002869348.1	1226	3.8e-132	lipoyltransferase [Arabidopsis lyrata subsp. lyrata]>gi|297315184|gb|EFH45607.1| lipoyltransferase [Arabidopsis lyrata subsp. lyrata]	334187048	NM_119256.5	877	0	Arabidopsis thaliana ethylene-responsive transcription factor ERF015 mRNA, complete cds	K03801	lipB	lipoyl(octanoyl) transferase	http://www.genome.jp/dbget-bin/www_bget?ko:K03801	Q948J9	1214	1.3e-131	Plastidial lipoyltransferase 2 OS=Arabidopsis thaliana GN=LIP2p PE=2 SV=1	PF03099//PF00847	Biotin/lipoate A/B protein ligase family//AP2 domain	GO:0042967//GO:0009107//GO:0006355//GO:0006464	acyl-carrier-protein biosynthetic process//lipoate biosynthetic process//regulation of transcription, DNA-templated//cellular protein modification process	GO:0003700//GO:0016415	transcription factor activity, sequence-specific DNA binding//octanoyltransferase activity	GO:0005737//GO:0005667	cytoplasm//transcription factor complex	KOG0325	Lipoyltransferase	FALSE	-1.2145	1	FALSE	-2.2729	0.092145	FALSE	-1.5294	0.19786	FALSE	-1.6187	0.63889
	2-3k.c23606/1/2966.2	29.92	48.2267	43.2533	60.4	102.243	57.8333	47.63	666	297821593	XP_002878679.1	561	1.1e-55	hypothetical protein ARALYDRAFT_481204 [Arabidopsis lyrata subsp. lyrata]>gi|297324518|gb|EFH54938.1| hypothetical protein ARALYDRAFT_481204 [Arabidopsis lyrata subsp. lyrata]	297821592	XM_002878633.1	274	1.40057e-139	Arabidopsis lyrata subsp. lyrata hypothetical protein, mRNA	--	--	--	--	O22174	558	3.5e-56	Ethylene-responsive transcription factor ERF008 OS=Arabidopsis thaliana GN=ERF008 PE=2 SV=1	PF00847	AP2 domain	GO:0006355	regulation of transcription, DNA-templated	GO:0003700//GO:0003677	transcription factor activity, sequence-specific DNA binding//DNA binding	GO:0005634//GO:0005667	nucleus//transcription factor complex	--	--	FALSE	-0.0008197	1	FALSE	0.57044	1	FALSE	1.144	0.41745	FALSE	1.2811	0.44018
	3-6k.c5581/1/8039.1	19.71	13.5633	8.62	4.27333	4.29	3.48667	3.56667	1089	297795923	XP_002865846.1	868	4.7e-91	hypothetical protein ARALYDRAFT_495189 [Arabidopsis lyrata subsp. lyrata]>gi|297311681|gb|EFH42105.1| hypothetical protein ARALYDRAFT_495189 [Arabidopsis lyrata subsp. lyrata]	387169544	JX003248.1	600	0	Capsella rubella clone BAC 34G24, complete sequence	K09286	EREBP	EREBP-like factor	http://www.genome.jp/dbget-bin/www_bget?ko:K09286	Q8VY90	837	2.6e-88	Ethylene-responsive transcription factor ERF105 OS=Arabidopsis thaliana GN=ERF105 PE=2 SV=1	PF00847	AP2 domain	GO:0006355	regulation of transcription, DNA-templated	GO:0003677//GO:0003700	DNA binding//transcription factor activity, sequence-specific DNA binding	GO:0005634//GO:0005667	nucleus//transcription factor complex	--	--	FALSE	-1.3052	1	FALSE	-2.4973	0.077027	FALSE	-2.1611	0.060308	FALSE	-0.98963	1
Jumonji	1-2k.c16773/2/1503	36.83	25.6233	51.3067	51.6667	9.48	2.90333	1.56	1552	727586496	XP_010466288.1	1982	4.4e-220	PREDICTED: putative lysine-specific demethylase JMJD5 isoform X1 [Camelina sativa]	727633980	XM_010489765.1	1236	0	PREDICTED: Camelina sativa putative lysine-specific demethylase JMJD5 (LOC104765969), transcript variant X2, mRNA	K10277	KDM8, JMJD5	lysine-specific demethylase 8	http://www.genome.jp/dbget-bin/www_bget?ko:K10277	Q8RWR1	1900	2e-211	Putative lysine-specific demethylase JMJD5 OS=Arabidopsis thaliana GN=JMJD5 PE=2 SV=1	--	--	--	--	--	--	--	--	KOG2132	Uncharacterized conserved protein, contains JmjC domain	DOWN	-5.1191	2.4617e-05	FALSE	-4.51	0.16037	FALSE	0.6637	0.96414	DOWN	-2.4041	6.8783e-05
	1-2k.c24661/1/1605	10.5667	5.62	11.0867	7.92667	2.41333	0.773333	0.506667	1598	727633981	XP_010488067.1	1016	4.7e-108	PREDICTED: putative lysine-specific demethylase JMJD5 isoform X1 [Camelina sativa]	727633980	XM_010489765.1	1202	0	PREDICTED: Camelina sativa putative lysine-specific demethylase JMJD5 (LOC104765969), transcript variant X2, mRNA	K10277	KDM8, JMJD5	lysine-specific demethylase 8	http://www.genome.jp/dbget-bin/www_bget?ko:K10277	Q8RWR1	974	4.9e-104	Putative lysine-specific demethylase JMJD5 OS=Arabidopsis thaliana GN=JMJD5 PE=2 SV=1	--	--	--	--	--	--	--	--	KOG2132	Uncharacterized conserved protein, contains JmjC domain	DOWN	-4.4506	0.028852	FALSE	-4.2593	0.21389	FALSE	-0.22461	1	FALSE	-2.1446	0.14846
	2-3k.c10121/1/4694	1.16667	0.31	0.126667	0.67	0	0	0	2312	79325193	NP_001031681.1	3455	0	probable lysine-specific demethylase JMJ14 [Arabidopsis thaliana]>gi|332658925|gb|AEE84325.1| probable lysine-specific demethylase JMJ14 [Arabidopsis thaliana]	79325192	NM_001036604.1	1847	0	Arabidopsis thaliana probable lysine-specific demethylase JMJ14 mRNA, complete cds	K11446	KDM5, JARID1	histone demethylase JARID1	http://www.genome.jp/dbget-bin/www_bget?ko:K11446	Q8GUI6	3455	0	Probable lysine-specific demethylase JMJ14 OS=Arabidopsis thaliana GN=JMJ14 PE=1 SV=1	PF05965//PF05964	F/Y rich C-terminus//F/Y-rich N-terminus	GO:0009910//GO:0045893//GO:0034720//GO:0048573//GO:0010216//GO:0043687	negative regulation of flower development//positive regulation of transcription, DNA-templated//histone H3-K4 demethylation//photoperiodism, flowering//maintenance of DNA methylation//post-translational protein modification	GO:0032453//GO:0003700//GO:0003677	histone demethylase activity (H3-K4 specific)//transcription factor activity, sequence-specific DNA binding//DNA binding	GO:0005667//GO:0005634	transcription factor complex//nucleus	--	--	FALSE	#NAME?	1	FALSE	#NAME?	0.053861	FALSE	-0.75541	1	FALSE	#NAME?	1
	2-3k.c11166/3/3217	1.78667	1.99333	2.29333	3.32	5.41333	4.37	6.11667	3178	334188234	NP_199502.2	1953	2.1e-216	transcription factor jumonji (jmj) family protein / zinc finger (C5HC2 type) family protein [Arabidopsis thaliana]>gi|332008063|gb|AED95446.1| transcription factor jumonji (jmj) family protein / zinc finger (C5HC2 type) family protein [Arabidopsis thaliana]	727621126	XM_010483097.1	2346	0	PREDICTED: Camelina sativa lysine-specific demethylase JMJ706-like (LOC104760209), transcript variant X2, mRNA	--	--	--	--	Q336N8	1164	9e-126	Lysine-specific demethylase JMJ706 OS=Oryza sativa subsp. japonica GN=JMJ706 PE=2 SV=1	--	--	GO:0006355//GO:0010200	regulation of transcription, DNA-templated//response to chitin	GO:0003700	transcription factor activity, sequence-specific DNA binding	GO:0005667//GO:0005634	transcription factor complex//nucleus	KOG1246	DNA-binding protein jumonji/RBP2/SMCY, contains JmjC domain	FALSE	1.4507	1	FALSE	1.8042	0.28019	FALSE	0.94753	0.77345	FALSE	1.281	0.65268
	2-3k.c11705/2/3227	0	1.64667	1.96333	4.75667	0.0633333	4.88333	3.95333	3180	727605315	XP_010475727.1	4346	0	PREDICTED: lysine-specific demethylase JMJ25-like isoform X1 [Camelina sativa]	727431520	XM_010491345.1	2358	0	PREDICTED: Camelina sativa lysine-specific demethylase JMJ25-like (LOC104767299), transcript variant X1, mRNA >gnl|BL_ORD_ID|26191252 PREDICTED: Camelina sativa lysine-specific demethylase JMJ25-like (LOC104767299), transcript variant X3, mRNA	K15601	KDM3	lysine-specific demethylase 3	http://www.genome.jp/dbget-bin/www_bget?ko:K15601	Q9SSE9	667	3.9e-68	Lysine-specific demethylase JMJ25 OS=Arabidopsis thaliana GN=JMJ25 PE=1 SV=1	PF08496//PF12678//PF06003//PF01040	Peptidase family S49 N-terminal//RING-H2 zinc finger//Survival motor neuron protein (SMN)//UbiA prenyltransferase family	GO:0006397	mRNA processing	GO:0004252//GO:0003723//GO:0008270//GO:0004659	serine-type endopeptidase activity//RNA binding//zinc ion binding//prenyltransferase activity	GO:0005737//GO:0005634//GO:0016021//GO:0005886	cytoplasm//nucleus//integral component of membrane//plasma membrane	KOG1356	Putative transcription factor 5qNCA, contains JmjC domain	FALSE	0.97326	1	UP	Inf	0.0014671	UP	Inf	0.0011929	FALSE	-4.942	1
	2-3k.c1930/6/3051	6.07333	4.12667	4.00667	0.303333	4.11667	1.35333	0.36	3036	727605315	XP_010475727.1	4326	0	PREDICTED: lysine-specific demethylase JMJ25-like isoform X1 [Camelina sativa]	727431520	XM_010491345.1	2362	0	PREDICTED: Camelina sativa lysine-specific demethylase JMJ25-like (LOC104767299), transcript variant X1, mRNA >gnl|BL_ORD_ID|26191252 PREDICTED: Camelina sativa lysine-specific demethylase JMJ25-like (LOC104767299), transcript variant X3, mRNA	K15601	KDM3	lysine-specific demethylase 3	http://www.genome.jp/dbget-bin/www_bget?ko:K15601	Q9SSE9	665	6.3e-68	Lysine-specific demethylase JMJ25 OS=Arabidopsis thaliana GN=JMJ25 PE=1 SV=1	PF12678	RING-H2 zinc finger	--	--	GO:0008270	zinc ion binding	--	--	KOG1356	Putative transcription factor 5qNCA, contains JmjC domain	FALSE	-3.5726	0.69886	DOWN	-4.2065	0.00097596	DOWN	-4.2103	9.1058e-05	FALSE	0.1288	1
	2-3k.c21403/2/2992	1.79667	0.616667	1.93333	0.84	0.0966667	2.31667	1.60333	3002	565478546	XP_006296913.1	3496	0	hypothetical protein CARUB_v10012905mg [Capsella rubella]>gi|482565622|gb|EOA29811.1| hypothetical protein CARUB_v10012905mg [Capsella rubella]	727472217	XM_010519762.1	1653	0	PREDICTED: Camelina sativa lysine-specific demethylase JMJ25-like (LOC104793410), mRNA	K15601	KDM3	lysine-specific demethylase 3	http://www.genome.jp/dbget-bin/www_bget?ko:K15601	Q9SSE9	3059	0	Lysine-specific demethylase JMJ25 OS=Arabidopsis thaliana GN=JMJ25 PE=1 SV=1	--	--	--	--	--	--	--	--	KOG1356	Putative transcription factor 5qNCA, contains JmjC domain	FALSE	-0.26444	1	FALSE	-0.14638	1	FALSE	-1.051	0.9042	FALSE	-4.347	0.081373
	2-3k.c24415/1/3148	0.793333	1.72333	0.383333	1.13333	0	0	0	3175	30685095	NP_193773.2	4414	0	probable lysine-specific demethylase JMJ14 [Arabidopsis thaliana]>gi|75150630|sp|Q8GUI6.1|JMJ14_ARATH RecName: Full=Probable lysine-specific demethylase JMJ14; AltName: Full=Jumonji domain-containing protein 14; AltName: Full=Jumonji domain-containing protein 4; AltName: Full=Lysine-specific histone demethylase JMJ14; AltName: Full=Protein JUMONJI 14>gi|27311761|gb|AAO00846.1| putative protein [A…	30685094	NM_118159.2	2480	0	Arabidopsis thaliana probable lysine-specific demethylase JMJ14 mRNA, complete cds	K11446	KDM5, JARID1	histone demethylase JARID1	http://www.genome.jp/dbget-bin/www_bget?ko:K11446	Q8GUI6	4414	0	Probable lysine-specific demethylase JMJ14 OS=Arabidopsis thaliana GN=JMJ14 PE=1 SV=1	PF05965//PF05964	F/Y rich C-terminus//F/Y-rich N-terminus	GO:0009910//GO:0034720//GO:0045893//GO:0010216//GO:0048573//GO:0043687	negative regulation of flower development//histone H3-K4 demethylation//positive regulation of transcription, DNA-templated//maintenance of DNA methylation//photoperiodism, flowering//post-translational protein modification	GO:0032453//GO:0003700//GO:0003677	histone demethylase activity (H3-K4 specific)//transcription factor activity, sequence-specific DNA binding//DNA binding	GO:0005634//GO:0005667	nucleus//transcription factor complex	KOG1246	DNA-binding protein jumonji/RBP2/SMCY, contains JmjC domain	FALSE	#NAME?	1	FALSE	#NAME?	0.52071	FALSE	0.46704	1	FALSE	#NAME?	0.96578
	2-3k.c9629/3/3494	1.20333	0.423333	0.483333	0.64	0	0.91	0.153333	3490	297837189	XP_002886476.1	3707	0	predicted protein [Arabidopsis lyrata subsp. lyrata]>gi|297332317|gb|EFH62735.1| predicted protein [Arabidopsis lyrata subsp. lyrata]	297837188	XM_002886430.1	1771	0	Arabidopsis lyrata subsp. lyrata predicted protein, mRNA	K15601	KDM3	lysine-specific demethylase 3	http://www.genome.jp/dbget-bin/www_bget?ko:K15601	Q9SSE9	1215	1.2e-131	Lysine-specific demethylase JMJ25 OS=Arabidopsis thaliana GN=JMJ25 PE=1 SV=1	PF16929	Accessory Sec system GspB-transporter	GO:0015031	protein transport	GO:0008270	zinc ion binding	--	--	KOG1356	Putative transcription factor 5qNCA, contains JmjC domain	FALSE	-1.4175	1	FALSE	-2.6183	0.89841	FALSE	-0.7005	1	FALSE	#NAME?	0.93556
	3-6k.c10143/1/3851	0.0366667	1.39667	1.18333	2.33667	0.0233333	2.10667	2.97667	3859	727571117	XP_010458105.1	5451	0	PREDICTED: putative lysine-specific demethylase JMJ16 [Camelina sativa]	727431414	XM_010490845.1	2860	0	PREDICTED: Camelina sativa putative lysine-specific demethylase JMJ16 (LOC104766840), transcript variant X6, mRNA	K11446	KDM5, JARID1	histone demethylase JARID1	http://www.genome.jp/dbget-bin/www_bget?ko:K11446	C0SUT9	5356	0	Putative lysine-specific demethylase JMJ16 OS=Arabidopsis thaliana GN=JMJ16 PE=2 SV=1	PF05965//PF05964	F/Y rich C-terminus//F/Y-rich N-terminus	--	--	--	--	GO:0005634	nucleus	KOG1246	DNA-binding protein jumonji/RBP2/SMCY, contains JmjC domain	FALSE	1.2988	1	UP	6.288	0.02318	UP	5.917	0.049531	FALSE	-5.5492	1
	3-6k.c15048/1/3255.1	0.0866667	2.28333	3.58333	4.87	0	8.31	8.67333	2856	565486103	XP_006300691.1	4532	0	hypothetical protein CARUB_v10019734mg [Capsella rubella]>gi|482569401|gb|EOA33589.1| hypothetical protein CARUB_v10019734mg [Capsella rubella]	727505694	XM_010430649.1	2274	0	PREDICTED: Camelina sativa F-box protein At1g78280-like (LOC104713510), mRNA	--	--	--	--	Q9M9E8	4508	0	F-box protein At1g78280 OS=Arabidopsis thaliana GN=At1g78280 PE=2 SV=3	PF04083//PF00190	Partial alpha/beta-hydrolase lipase region//Cupin	GO:0006629	lipid metabolic process	GO:0045735	nutrient reservoir activity	--	--	KOG2130	Phosphatidylserine-specific receptor PtdSerR, contains JmjC domain	FALSE	1.2838	1	UP	6.6682	0.011335	UP	5.8001	0.035851	FALSE	#NAME?	0.081373
	3-6k.c17981/1/3975	0	0.116667	0.773333	1.17	0.0266667	2.35667	2.63667	3960	727571117	XP_010458105.1	5433	0	PREDICTED: putative lysine-specific demethylase JMJ16 [Camelina sativa]	727431414	XM_010490845.1	2926	0	PREDICTED: Camelina sativa putative lysine-specific demethylase JMJ16 (LOC104766840), transcript variant X6, mRNA	K11446	KDM5, JARID1	histone demethylase JARID1	http://www.genome.jp/dbget-bin/www_bget?ko:K11446	C0SUT9	5346	0	Putative lysine-specific demethylase JMJ16 OS=Arabidopsis thaliana GN=JMJ16 PE=2 SV=1	PF05965//PF05964	F/Y rich C-terminus//F/Y-rich N-terminus	--	--	--	--	GO:0005634	nucleus	KOG1246	DNA-binding protein jumonji/RBP2/SMCY, contains JmjC domain	FALSE	1.7731	1	UP	Inf	0.013209	UP	Inf	0.00062888	FALSE	-4.9419	1
	3-6k.c6282/1/6361	0.0566667	0.763333	0.243333	0.266667	0.793333	0.403333	1.64667	3037	297806397	XP_002871082.1	3799	0	hypothetical protein ARALYDRAFT_487204 [Arabidopsis lyrata subsp. lyrata]>gi|297316919|gb|EFH47341.1| hypothetical protein ARALYDRAFT_487204 [Arabidopsis lyrata subsp. lyrata]	297806396	XM_002871036.1	2227	0	Arabidopsis lyrata subsp. lyrata hypothetical protein, mRNA	--	--	--	--	Q6BDA0	3765	0	Probable lysine-specific demethylase ELF6 OS=Arabidopsis thaliana GN=ELF6 PE=1 SV=1	PF04987	Phosphatidylinositolglycan class N (PIG-N)	GO:0006506	GPI anchor biosynthetic process	GO:0016740//GO:0003676//GO:0008270	transferase activity//nucleic acid binding//zinc ion binding	GO:0005622//GO:0005789	intracellular//endoplasmic reticulum membrane	KOG1246	DNA-binding protein jumonji/RBP2/SMCY, contains JmjC domain	FALSE	2.785	1	UP	4.868	0.047325	FALSE	2.2862	1	FALSE	1.8039	1
Pseudo ARR-B	1-2k.c11118/1/1774	22.1733	23.7767	19.6333	11.57	5.64667	18.57	21.62	1775	565458790	XP_006287394.1	2319	4.2e-259	hypothetical protein CARUB_v10000600mg [Capsella rubella]>gi|482556100|gb|EOA20292.1| hypothetical protein CARUB_v10000600mg [Capsella rubella]	565458789	XM_006287332.1	1206	0	Capsella rubella hypothetical protein (CARUB_v10000600mg) mRNA, complete cds	K12130	PRR5	pseudo-response regulator 5	http://www.genome.jp/dbget-bin/www_bget?ko:K12130	Q6LA42	2267	6.3e-254	Two-component response regulator-like APRR5 OS=Arabidopsis thaliana GN=APRR5 PE=1 SV=2	PF06203//PF00072//PF02045	CCT motif//Response regulator receiver domain//CCAAT-binding transcription factor (CBF-B/NF-YA) subunit B	GO:0000160//GO:0006355	phosphorelay signal transduction system//regulation of transcription, DNA-templated	GO:0005515//GO:0003700	protein binding//transcription factor activity, sequence-specific DNA binding	GO:0005667	transcription factor complex	--	--	FALSE	0.1532	1	FALSE	-0.0011216	1	FALSE	-0.86312	0.61855	FALSE	-1.7598	0.079971
	1-2k.c14184/2/2308	20.6033	16.8033	14.0867	6.94667	1.36	4.28667	1.87333	2281	18424319	NP_568919.1	1957	5.1e-217	pseudo-response regulator 3 [Arabidopsis thaliana]>gi|334188506|ref|NP_001190574.1| pseudo-response regulator 3 [Arabidopsis thaliana]>gi|52783244|sp|Q9LVG4.1|APRR3_ARATH RecName: Full=Two-component response regulator-like APRR3; AltName: Full=Pseudo-response regulator 3>gi|8777349|dbj|BAA96939.1| unnamed protein product [Arabidopsis thaliana]>gi|10281008|dbj|BAB13744.1| pseudo-response regulator…	186532600	NM_125403.2	1264	0	Arabidopsis thaliana pseudo-response regulator 3 mRNA, complete cds	K12131	PRR3	pseudo-response regulator 3	http://www.genome.jp/dbget-bin/www_bget?ko:K12131	Q9LVG4	1957	7.2e-218	Two-component response regulator-like APRR3 OS=Arabidopsis thaliana GN=APRR3 PE=1 SV=1	PF04608//PF06203//PF00072	Phosphatidylglycerophosphatase A//CCT motif//Response regulator receiver domain	GO:0006355//GO:0006333//GO:0006629//GO:0000160//GO:0046486//GO:0032091//GO:0042752	regulation of transcription, DNA-templated//chromatin assembly or disassembly//lipid metabolic process//phosphorelay signal transduction system//glycerolipid metabolic process//negative regulation of protein binding//regulation of circadian rhythm	GO:0000156//GO:0005515//GO:0008962	phosphorelay response regulator activity//protein binding//phosphatidylglycerophosphatase activity	GO:0005634	nucleus	--	--	FALSE	-2.9881	0.11719	DOWN	-3.5261	0.00065822	FALSE	-1.4907	0.10645	DOWN	-3.3318	2.8764e-05
	1-2k.c20341/2/2141	7.72333	8.24333	18.2967	15.8767	4.01333	1.99333	2.45333	2142	727540638	XP_010443957.1	2673	4.6e-300	PREDICTED: two-component response regulator-like APRR1 [Camelina sativa]	727425866	XM_010458968.1	1467	0	PREDICTED: Camelina sativa two-component response regulator-like APRR1 (LOC104738763), transcript variant X1, mRNA	K12127	TOC1, APRR1	pseudo-response regulator 1	http://www.genome.jp/dbget-bin/www_bget?ko:K12127	Q9LKL2	2051	8.5e-229	Two-component response regulator-like APRR1 OS=Arabidopsis thaliana GN=APRR1 PE=1 SV=1	PF00072//PF06203//PF00851	Response regulator receiver domain//CCT motif//Helper component proteinase	GO:0000160//GO:0006508	phosphorelay signal transduction system//proteolysis	GO:0005515//GO:0004197	protein binding//cysteine-type endopeptidase activity	--	--	--	--	FALSE	-2.9018	0.11053	FALSE	-1.5912	0.39544	FALSE	1.1292	0.3905	DOWN	-2.1711	0.0076328
	1-2k.c20473/2/2466	38.4567	31.9567	48.9433	30.92	12.5667	6.97667	7.08667	2476	727540638	XP_010443957.1	2439	7.2e-273	PREDICTED: two-component response regulator-like APRR1 [Camelina sativa]	727540637	XM_010445655.1	1636	0	PREDICTED: Camelina sativa two-component response regulator-like APRR1 (LOC104726724), mRNA	K12127	TOC1, APRR1	pseudo-response regulator 1	http://www.genome.jp/dbget-bin/www_bget?ko:K12127	Q9LKL2	1874	3.3e-208	Two-component response regulator-like APRR1 OS=Arabidopsis thaliana GN=APRR1 PE=1 SV=1	PF00072//PF06203	Response regulator receiver domain//CCT motif	GO:0000160	phosphorelay signal transduction system	GO:0005515	protein binding	--	--	--	--	FALSE	-2.7878	0.058641	DOWN	-2.4157	0.012184	FALSE	-0.23005	1	DOWN	-1.9166	0.00061585
	1-2k.c23106/1/2554	24.31	26.8233	36.3033	24.1933	14.5	6.35667	5.99333	2546	727540638	XP_010443957.1	2673	5.4e-300	PREDICTED: two-component response regulator-like APRR1 [Camelina sativa]	727425866	XM_010458968.1	1467	0	PREDICTED: Camelina sativa two-component response regulator-like APRR1 (LOC104738763), transcript variant X1, mRNA	K12127	TOC1, APRR1	pseudo-response regulator 1	http://www.genome.jp/dbget-bin/www_bget?ko:K12127	Q9LKL2	2051	1e-228	Two-component response regulator-like APRR1 OS=Arabidopsis thaliana GN=APRR1 PE=1 SV=1	PF00851//PF06203//PF00072	Helper component proteinase//CCT motif//Response regulator receiver domain	GO:0006508//GO:0000160	proteolysis//phosphorelay signal transduction system	GO:0005515//GO:0004197	protein binding//cysteine-type endopeptidase activity	--	--	--	--	FALSE	-2.6097	0.10657	FALSE	-2.0067	0.060531	FALSE	0.091894	1	FALSE	-1.2701	0.093465
	1-2k.c23808/1/1758	69.38	50.0533	45.39	24.2033	3.48667	14.3067	7.40667	1758	18424319	NP_568919.1	1787	2e-197	pseudo-response regulator 3 [Arabidopsis thaliana]>gi|334188506|ref|NP_001190574.1| pseudo-response regulator 3 [Arabidopsis thaliana]>gi|52783244|sp|Q9LVG4.1|APRR3_ARATH RecName: Full=Two-component response regulator-like APRR3; AltName: Full=Pseudo-response regulator 3>gi|8777349|dbj|BAA96939.1| unnamed protein product [Arabidopsis thaliana]>gi|10281008|dbj|BAB13744.1| pseudo-response regulator…	334188505	NM_001203645.1	1099	0	Arabidopsis thaliana pseudo-response regulator 3 mRNA, complete cds	K12131	PRR3	pseudo-response regulator 3	http://www.genome.jp/dbget-bin/www_bget?ko:K12131	Q9LVG4	1787	2.9e-198	Two-component response regulator-like APRR3 OS=Arabidopsis thaliana GN=APRR3 PE=1 SV=1	PF00072//PF06203	Response regulator receiver domain//CCT motif	GO:0006333//GO:0006355//GO:0000160//GO:0042752//GO:0032091	chromatin assembly or disassembly//regulation of transcription, DNA-templated//phosphorelay signal transduction system//regulation of circadian rhythm//negative regulation of protein binding	GO:0005515//GO:0000156	protein binding//phosphorelay response regulator activity	GO:0005634	nucleus	--	--	FALSE	-2.6291	0.12497	DOWN	-3.218	0.00048775	FALSE	-1.458	0.061575	DOWN	-3.6697	3.1655e-10
	1-2k.c25340/1/1847	21.72	18.11	25.0667	15.4	5.76667	3.47667	4.57	1848	727540638	XP_010443957.1	2052	4e-228	PREDICTED: two-component response regulator-like APRR1 [Camelina sativa]	727540637	XM_010445655.1	1314	0	PREDICTED: Camelina sativa two-component response regulator-like APRR1 (LOC104726724), mRNA	K12127	TOC1, APRR1	pseudo-response regulator 1	http://www.genome.jp/dbget-bin/www_bget?ko:K12127	Q9LKL2	1493	3.7e-164	Two-component response regulator-like APRR1 OS=Arabidopsis thaliana GN=APRR1 PE=1 SV=1	PF06203//PF00072	CCT motif//Response regulator receiver domain	GO:0000160	phosphorelay signal transduction system	GO:0005515	protein binding	--	--	--	--	FALSE	-2.4632	0.23581	DOWN	-2.2384	0.049282	FALSE	-0.40673	1	DOWN	-2.0692	0.0075949
	1-2k.c28153/2/2067	22.2733	23.42	18.03	10.3567	6.60667	19.8133	26.35	2036	565458790	XP_006287394.1	2531	1.3e-283	hypothetical protein CARUB_v10000600mg [Capsella rubella]>gi|482556100|gb|EOA20292.1| hypothetical protein CARUB_v10000600mg [Capsella rubella]	565458789	XM_006287332.1	1328	0	Capsella rubella hypothetical protein (CARUB_v10000600mg) mRNA, complete cds	K12130	PRR5	pseudo-response regulator 5	http://www.genome.jp/dbget-bin/www_bget?ko:K12130	Q6LA42	2460	3e-276	Two-component response regulator-like APRR5 OS=Arabidopsis thaliana GN=APRR5 PE=1 SV=2	PF06203//PF00072	CCT motif//Response regulator receiver domain	GO:0000160	phosphorelay signal transduction system	GO:0005515	protein binding	--	--	--	--	FALSE	0.57086	1	FALSE	0.29029	1	FALSE	-1.0148	0.43591	FALSE	-1.4007	0.24125
	1-2k.c31419/1/2036	52.4533	43.1333	35.4867	16.6967	3.40333	6.31	2.11	2036	18424319	NP_568919.1	1838	2.9e-203	pseudo-response regulator 3 [Arabidopsis thaliana]>gi|334188506|ref|NP_001190574.1| pseudo-response regulator 3 [Arabidopsis thaliana]>gi|52783244|sp|Q9LVG4.1|APRR3_ARATH RecName: Full=Two-component response regulator-like APRR3; AltName: Full=Pseudo-response regulator 3>gi|8777349|dbj|BAA96939.1| unnamed protein product [Arabidopsis thaliana]>gi|10281008|dbj|BAB13744.1| pseudo-response regulator…	334188505	NM_001203645.1	1198	0	Arabidopsis thaliana pseudo-response regulator 3 mRNA, complete cds	K12131	PRR3	pseudo-response regulator 3	http://www.genome.jp/dbget-bin/www_bget?ko:K12131	Q9LVG4	1838	4e-204	Two-component response regulator-like APRR3 OS=Arabidopsis thaliana GN=APRR3 PE=1 SV=1	PF06203//PF00072	CCT motif//Response regulator receiver domain	GO:0042752//GO:0032091//GO:0000160//GO:0006355//GO:0006333	regulation of circadian rhythm//negative regulation of protein binding//phosphorelay signal transduction system//regulation of transcription, DNA-templated//chromatin assembly or disassembly	GO:0005515//GO:0000156	protein binding//phosphorelay response regulator activity	GO:0005634	nucleus	--	--	DOWN	-4.0507	0.0014407	DOWN	-4.6114	3.0839e-07	DOWN	-1.5826	0.03689	DOWN	-3.3371	1.5935e-08
	1-2k.c36058/1/2477	28.1033	28.47	18.33	8.88333	1.79333	6.78667	4.52333	2476	18424319	NP_568919.1	1838	3.5e-203	pseudo-response regulator 3 [Arabidopsis thaliana]>gi|334188506|ref|NP_001190574.1| pseudo-response regulator 3 [Arabidopsis thaliana]>gi|52783244|sp|Q9LVG4.1|APRR3_ARATH RecName: Full=Two-component response regulator-like APRR3; AltName: Full=Pseudo-response regulator 3>gi|8777349|dbj|BAA96939.1| unnamed protein product [Arabidopsis thaliana]>gi|10281008|dbj|BAB13744.1| pseudo-response regulator…	334188505	NM_001203645.1	1198	0	Arabidopsis thaliana pseudo-response regulator 3 mRNA, complete cds	K12131	PRR3	pseudo-response regulator 3	http://www.genome.jp/dbget-bin/www_bget?ko:K12131	Q9LVG4	1838	4.9e-204	Two-component response regulator-like APRR3 OS=Arabidopsis thaliana GN=APRR3 PE=1 SV=1	PF00072//PF06203	Response regulator receiver domain//CCT motif	GO:0042752//GO:0032091//GO:0006333//GO:0006355//GO:0000160	regulation of circadian rhythm//negative regulation of protein binding//chromatin assembly or disassembly//regulation of transcription, DNA-templated//phosphorelay signal transduction system	GO:0005515//GO:0000156	protein binding//phosphorelay response regulator activity	GO:0005634	nucleus	--	--	FALSE	-2.0466	0.56583	DOWN	-2.6508	0.0085173	DOWN	-1.5983	0.046931	DOWN	-3.3036	1.7565e-06
	2-3k.c12856/2/2857	21.53	14.77	5.73	2.93	0.34	10.0767	7.93	2816	297810367	XP_002873067.1	2893	0	pseudo-response regulator 7 [Arabidopsis lyrata subsp. lyrata]>gi|297318904|gb|EFH49326.1| pseudo-response regulator 7 [Arabidopsis lyrata subsp. lyrata]	30679774	NM_120359.2	2018	0	Arabidopsis thaliana pseudo-response regulator 7 mRNA, complete cds	K12129	PRR7	pseudo-response regulator 7	http://www.genome.jp/dbget-bin/www_bget?ko:K12129	Q93WK5	2890	0	Two-component response regulator-like APRR7 OS=Arabidopsis thaliana GN=APRR7 PE=1 SV=1	PF00072//PF06203	Response regulator receiver domain//CCT motif	GO:0035556//GO:0000160//GO:0006355	intracellular signal transduction//phosphorelay signal transduction system//regulation of transcription, DNA-templated	GO:0005515//GO:0000156	protein binding//phosphorelay response regulator activity	GO:0005622	intracellular	--	--	FALSE	0.43418	1	FALSE	-1.5006	0.2659	DOWN	-2.8188	0.00017333	DOWN	-4.0363	0.00031934
	2-3k.c13898/2/3162	5.63667	4.29333	2.46667	0.333333	0.133333	3.67333	2.25	3148	297810367	XP_002873067.1	1887	9.3e-209	pseudo-response regulator 7 [Arabidopsis lyrata subsp. lyrata]>gi|297318904|gb|EFH49326.1| pseudo-response regulator 7 [Arabidopsis lyrata subsp. lyrata]	30679774	NM_120359.2	1364	0	Arabidopsis thaliana pseudo-response regulator 7 mRNA, complete cds	K12129	PRR7	pseudo-response regulator 7	http://www.genome.jp/dbget-bin/www_bget?ko:K12129	Q93WK5	1871	9.3e-208	Two-component response regulator-like APRR7 OS=Arabidopsis thaliana GN=APRR7 PE=1 SV=1	PF06203//PF00072	CCT motif//Response regulator receiver domain	GO:0000160//GO:0035556//GO:0006355	phosphorelay signal transduction system//intracellular signal transduction//regulation of transcription, DNA-templated	GO:0000156//GO:0005515	phosphorelay response regulator activity//protein binding	GO:0005622	intracellular	--	--	FALSE	-0.19549	1	FALSE	-1.4496	0.61455	DOWN	-4.085	0.046519	DOWN	-4.2192	0.027977
C2H2	1-2k.c13764/1/1733	29.4267	19.2667	13.5033	7.05	6.81667	11.93	6.35333	1709	727606862	XP_010476519.1	1887	5e-209	PREDICTED: zinc finger protein NUTCRACKER-like isoform X2 [Camelina sativa]	727572799	XM_010460660.1	1067	0	PREDICTED: Camelina sativa zinc finger protein MAGPIE-like (LOC104740129), mRNA	--	--	--	--	Q8RWX7	1876	1.3e-208	Protein indeterminate-domain 6, chloroplastic OS=Arabidopsis thaliana GN=IDD6 PE=1 SV=1	PF00096//PF13465//PF13912	Zinc finger, C2H2 type//Zinc-finger double domain//C2H2-type zinc finger	--	--	GO:0046872	metal ion binding	--	--	--	--	FALSE	-1.1941	1	DOWN	-2.3167	0.029305	DOWN	-1.991	0.015351	FALSE	-0.95423	0.89632
	1-2k.c13810/1/1758	5.52	9.3	10.72	0	6.92	6.66333	6.45	1872	297817724	XP_002876745.1	645	5.8e-65	hypothetical protein ARALYDRAFT_904327 [Arabidopsis lyrata subsp. lyrata]>gi|297322583|gb|EFH53004.1| hypothetical protein ARALYDRAFT_904327 [Arabidopsis lyrata subsp. lyrata]	--	--	--	--	--	--	--	--	--	--	--	--	--	PF00170//PF00096	bZIP transcription factor//Zinc finger, C2H2 type	GO:0006355	regulation of transcription, DNA-templated	GO:0043565//GO:0046872//GO:0003700	sequence-specific DNA binding//metal ion binding//transcription factor activity, sequence-specific DNA binding	GO:0005667	transcription factor complex	--	--	FALSE	-0.82878	1	FALSE	0.2457	1	FALSE	#NAME?	0.35815	FALSE	-0.53065	1
	1-2k.c15292/2/2044	19.8833	19.8633	8.73333	6.33	3.79667	5.26333	5.26333	2034	565466430	XP_006291095.1	1826	7.1e-202	hypothetical protein CARUB_v10017209mg [Capsella rubella]>gi|482559802|gb|EOA23993.1| hypothetical protein CARUB_v10017209mg [Capsella rubella]	186510887	NM_114930.5	1152	0	Arabidopsis thaliana indeterminate-domain 2 protein mRNA, complete cds	--	--	--	--	Q9SCQ6	1781	1.6e-197	Protein indeterminate-domain 2 OS=Arabidopsis thaliana GN=IDD2 PE=2 SV=1	PF13465//PF00096//PF04810//PF13912	Zinc-finger double domain//Zinc finger, C2H2 type//Sec23/Sec24 zinc finger//C2H2-type zinc finger	GO:0006888//GO:0006886	ER to Golgi vesicle-mediated transport//intracellular protein transport	GO:0008270//GO:0046872	zinc ion binding//metal ion binding	GO:0030127	COPII vesicle coat	--	--	FALSE	-0.73283	1	FALSE	-1.936	0.11228	FALSE	-1.6055	0.08854	FALSE	-1.1679	0.79273
	1-2k.c16528/2/1986	0.1	0.786667	0.706667	1.56667	0	1.50333	1.43667	1993	727652436	XP_010496946.1	1988	1.1e-220	PREDICTED: zinc finger protein NUTCRACKER-like [Camelina sativa]	727652435	XM_010498644.1	1685	0	PREDICTED: Camelina sativa zinc finger protein NUTCRACKER-like (LOC104773973), mRNA	--	--	--	--	Q9ZUL3	1973	8.8e-220	Protein indeterminate-domain 5, chloroplastic OS=Arabidopsis thaliana GN=IDD5 PE=1 SV=1	PF13912//PF00096//PF13465	C2H2-type zinc finger//Zinc finger, C2H2 type//Zinc-finger double domain	--	--	GO:0046872	metal ion binding	--	--	--	--	FALSE	0.95658	1	FALSE	3.8233	0.32497	FALSE	3.9457	0.22163	FALSE	#NAME?	0.95752
	1-2k.c18336/1/2136	24.96	23.2033	15.48	12.57	10.33	7.65333	7.49	1996	565466430	XP_006291095.1	1734	3.3e-191	hypothetical protein CARUB_v10017209mg [Capsella rubella]>gi|482559802|gb|EOA23993.1| hypothetical protein CARUB_v10017209mg [Capsella rubella]	186510887	NM_114930.5	1101	0	Arabidopsis thaliana indeterminate-domain 2 protein mRNA, complete cds	--	--	--	--	Q9SCQ6	1700	4e-188	Protein indeterminate-domain 2 OS=Arabidopsis thaliana GN=IDD2 PE=2 SV=1	PF00096//PF04810//PF13912	Zinc finger, C2H2 type//Sec23/Sec24 zinc finger//C2H2-type zinc finger	GO:0006886//GO:0006888	intracellular protein transport//ER to Golgi vesicle-mediated transport	GO:0046872//GO:0008270	metal ion binding//zinc ion binding	GO:0030127	COPII vesicle coat	--	--	FALSE	-1.0619	1	FALSE	-1.7693	0.13602	FALSE	-0.94098	0.51263	FALSE	-0.54601	1
	1-2k.c20396/3/1971	8.02667	6.93333	1.79333	0	1.90667	0.37	3.27333	1951	727577187	XP_010461267.1	2050	7.2e-228	PREDICTED: protein SENSITIVE TO PROTON RHIZOTOXICITY 1-like [Camelina sativa]	332189094	CP002684.1	1152	0	Arabidopsis thaliana chromosome 1 sequence	--	--	--	--	Q9C8N5	1752	3.6e-194	Protein SENSITIVE TO PROTON RHIZOTOXICITY 1 OS=Arabidopsis thaliana GN=STOP1 PE=2 SV=1	PF00096//PF13912	Zinc finger, C2H2 type//C2H2-type zinc finger	--	--	GO:0046872	metal ion binding	--	--	--	--	FALSE	0.90366	1	FALSE	-1.2538	0.80387	DOWN	#NAME?	0.0026195	FALSE	0.15232	1
	1-2k.c3143/1/1676	78.75	129.283	160.297	188.147	154.717	107.443	111.827	1101	297834868	XP_002885316.1	895	3.5e-94	hypothetical protein ARALYDRAFT_479472 [Arabidopsis lyrata subsp. lyrata]>gi|297331156|gb|EFH61575.1| hypothetical protein ARALYDRAFT_479472 [Arabidopsis lyrata subsp. lyrata]	332640072	CP002686.1	684	0	Arabidopsis thaliana chromosome 3, complete sequence	--	--	--	--	Q9SSW2	890	1.8e-94	Zinc finger protein AZF2 OS=Arabidopsis thaliana GN=AZF2 PE=2 SV=1	PF13465//PF00096//PF00937//PF06467//PF13912	Zinc-finger double domain//Zinc finger, C2H2 type//Coronavirus nucleocapsid protein//MYM-type Zinc finger with FCS sequence motif//C2H2-type zinc finger	--	--	GO:0008270//GO:0046872	zinc ion binding//metal ion binding	GO:0019013	viral nucleocapsid	--	--	FALSE	-0.52151	1	FALSE	0.52094	0.93504	FALSE	1.335	0.077184	FALSE	-0.016415	1
	1-2k.c33470/1/1774	10.9267	6.55	4.7	5.51	2.85667	5.16	4.54667	1776	22329554	NP_172910.2	1779	1.7e-196	C2H2-like zinc finger protein [Arabidopsis thaliana]>gi|334182577|ref|NP_001184994.1| C2H2-like zinc finger protein [Arabidopsis thaliana]>gi|75330722|sp|Q8RWX7.1|IDD6_ARATH RecName: Full=Protein indeterminate-domain 6, chloroplastic; Flags: Precursor>gi|20259484|gb|AAM13862.1| putative zinc finger protein [Arabidopsis thaliana]>gi|22136762|gb|AAM91700.1| putative zinc finger protein [Arabidopsis…	727572799	XM_010460660.1	1053	0	PREDICTED: Camelina sativa zinc finger protein MAGPIE-like (LOC104740129), mRNA	--	--	--	--	Q8RWX7	1779	2.4e-197	Protein indeterminate-domain 6, chloroplastic OS=Arabidopsis thaliana GN=IDD6 PE=1 SV=1	PF13912//PF00096//PF13465	C2H2-type zinc finger//Zinc finger, C2H2 type//Zinc-finger double domain	--	--	GO:0046872//GO:0003676//GO:0008270//GO:0003700	metal ion binding//nucleic acid binding//zinc ion binding//transcription factor activity, sequence-specific DNA binding	GO:0005634//GO:0005667	nucleus//transcription factor complex	--	--	FALSE	-0.14307	1	FALSE	-1.35	0.4942	FALSE	-0.93272	0.68963	FALSE	-0.70832	1
	1-2k.c4478/1/996	96.1967	182.593	128.947	99.5867	56.0833	85.37	127.913	987	727435933	XP_010499266.1	919	5.1e-97	PREDICTED: zinc finger protein ZAT10 [Camelina sativa]	727435932	XM_010500964.1	671	0	PREDICTED: Camelina sativa zinc finger protein ZAT10 (LOC104776826), mRNA	--	--	--	--	Q96289	846	2.1e-89	Zinc finger protein ZAT10 OS=Arabidopsis thaliana GN=ZAT10 PE=2 SV=1	PF00096//PF13465//PF13912	Zinc finger, C2H2 type//Zinc-finger double domain//C2H2-type zinc finger	--	--	GO:0046872	metal ion binding	--	--	--	--	FALSE	0.056373	1	FALSE	0.51392	1	FALSE	0.12285	1	FALSE	-1.1818	0.15267
	2-3k.c6688/2/3387.2	0	2.71333	1.84	4.29333	0	6.08667	7.80667	778	297827129	XP_002881447.1	826	2.5e-86	zinc finger (C2H2-type) family protein [Arabidopsis lyrata subsp. lyrata]>gi|297327286|gb|EFH57706.1| zinc finger (C2H2-type) family protein [Arabidopsis lyrata subsp. lyrata]	334184722	NM_129205.2	536	0	Arabidopsis thaliana ENTH/VHS-like protein mRNA, complete cds	K14400	PCF11	pre-mRNA cleavage complex 2 protein Pcf11	http://www.genome.jp/dbget-bin/www_bget?ko:K14400	Q0WPF2	280	7.1e-24	Polyadenylation and cleavage factor homolog 4 OS=Arabidopsis thaliana GN=PCFS4 PE=1 SV=1	PF00320//PF00096	GATA zinc finger//Zinc finger, C2H2 type	GO:0006355	regulation of transcription, DNA-templated	GO:0043565//GO:0046872//GO:0003700//GO:0008270	sequence-specific DNA binding//metal ion binding//transcription factor activity, sequence-specific DNA binding//zinc ion binding	GO:0005622//GO:0005667	intracellular//transcription factor complex	--	--	FALSE	1.9873	1	UP	Inf	0.0091809	UP	Inf	0.047659	FALSE	#NAME?	0.98585
	3-6k.c18310/1/3578.1	7.14667	4.61	1.85333	1.42333	2.55667	0.583333	0.61	1536	685325573	XP_009101276.1	1185	1.1e-127	PREDICTED: LOW QUALITY PROTEIN: zinc finger protein JACKDAW [Brassica rapa]	727652435	XM_010498644.1	1223	0	PREDICTED: Camelina sativa zinc finger protein NUTCRACKER-like (LOC104773973), mRNA	--	--	--	--	Q9ZUL3	700	2.8e-72	Protein indeterminate-domain 5, chloroplastic OS=Arabidopsis thaliana GN=IDD5 PE=1 SV=1	PF00096	Zinc finger, C2H2 type	--	--	GO:0046872	metal ion binding	--	--	--	--	FALSE	-1.6107	1	DOWN	-3.5967	0.033197	FALSE	-2.2192	0.15994	FALSE	0.54942	1
SWI/SNF-BAF60b	1-2k.c24442/1/2280	0	2.53667	2.05333	1.5	1.77	0.12	0.366667	2280	297832462	XP_002884113.1	2975	0	PHD finger family protein [Arabidopsis lyrata subsp. lyrata]>gi|297329953|gb|EFH60372.1| PHD finger family protein [Arabidopsis lyrata subsp. lyrata]	30680212	NM_179640.1	1721	0	Arabidopsis thaliana PHD finger, SWIB/MDM2 and GYF domain-containing protein mRNA, complete cds	--	--	--	--	Q9SD34	521	2.4e-51	Zinc finger CCCH domain-containing protein 44 OS=Arabidopsis thaliana GN=At3g51120 PE=2 SV=3	PF02201//PF05038//PF02213	SWIB/MDM2 domain//Cytochrome Cytochrome b558 alpha-subunit//GYF domain	--	--	GO:0008270//GO:0020037//GO:0005515//GO:0046872	zinc ion binding//heme binding//protein binding//metal ion binding	--	--	--	--	FALSE	-2.2972	1	FALSE	Inf	0.63438	FALSE	Inf	0.50471	FALSE	-0.13299	1
	1-2k.c2701/4/1896	3.57333	3.90667	3.59333	1.19333	4.64	2.38667	0	1898	565486461	XP_006300870.1	2873	0	hypothetical protein CARUB_v10019962mg, partial [Capsella rubella]>gi|482569580|gb|EOA33768.1| hypothetical protein CARUB_v10019962mg, partial [Capsella rubella]	297841900	XM_002888786.1	1573	0	Arabidopsis lyrata subsp. lyrata eukaryotic translation initiation factor SUI1 family protein, mRNA	K15027	EIF2D	translation initiation factor 2D	http://www.genome.jp/dbget-bin/www_bget?ko:K15027	Q5RA63	684	2.5e-70	Eukaryotic translation initiation factor 2D OS=Pongo abelii GN=EIF2D PE=2 SV=1	PF02201//PF01253//PF01472	SWIB/MDM2 domain//Translation initiation factor SUI1//PUA domain	GO:0006413//GO:0006446	translational initiation//regulation of translational initiation	GO:0005515//GO:0003743//GO:0003723	protein binding//translation initiation factor activity//RNA binding	GO:0005840	ribosome	KOG2522	Filamentous baseplate protein Ligatin, contains PUA domain	FALSE	#NAME?	0.30543	DOWN	#NAME?	0.00045522	FALSE	-1.485	0.64485	FALSE	0.42208	1
	1-2k.c32346/1/2151.1	0	0.98	0.723333	1.87667	0	2.26667	1.05333	1802	565486461	XP_006300870.1	2652	1e-297	hypothetical protein CARUB_v10019962mg, partial [Capsella rubella]>gi|482569580|gb|EOA33768.1| hypothetical protein CARUB_v10019962mg, partial [Capsella rubella]	297841900	XM_002888786.1	1519	0	Arabidopsis lyrata subsp. lyrata eukaryotic translation initiation factor SUI1 family protein, mRNA	K15027	EIF2D	translation initiation factor 2D	http://www.genome.jp/dbget-bin/www_bget?ko:K15027	Q5RA63	614	3.1e-62	Eukaryotic translation initiation factor 2D OS=Pongo abelii GN=EIF2D PE=2 SV=1	PF02201//PF01472//PF01253	SWIB/MDM2 domain//PUA domain//Translation initiation factor SUI1	GO:0006413//GO:0006446	translational initiation//regulation of translational initiation	GO:0003723//GO:0005515//GO:0003743	RNA binding//protein binding//translation initiation factor activity	GO:0005840	ribosome	KOG2522	Filamentous baseplate protein Ligatin, contains PUA domain	FALSE	0.44806	1	FALSE	Inf	0.17234	FALSE	Inf	0.11402	FALSE	#NAME?	0.96578
	1-2k.c3615/2/1917	0	3.99	3.69333	5.82667	0	5.11	4.32667	1916	565486461	XP_006300870.1	2928	0	hypothetical protein CARUB_v10019962mg, partial [Capsella rubella]>gi|482569580|gb|EOA33768.1| hypothetical protein CARUB_v10019962mg, partial [Capsella rubella]	297841900	XM_002888786.1	1651	0	Arabidopsis lyrata subsp. lyrata eukaryotic translation initiation factor SUI1 family protein, mRNA	K15027	EIF2D	translation initiation factor 2D	http://www.genome.jp/dbget-bin/www_bget?ko:K15027	Q5RA63	690	5e-71	Eukaryotic translation initiation factor 2D OS=Pongo abelii GN=EIF2D PE=2 SV=1	PF02201//PF01253//PF01472	SWIB/MDM2 domain//Translation initiation factor SUI1//PUA domain	GO:0006413//GO:0006446	translational initiation//regulation of translational initiation	GO:0003723//GO:0003743//GO:0005515	RNA binding//translation initiation factor activity//protein binding	GO:0005840	ribosome	KOG2522	Filamentous baseplate protein Ligatin, contains PUA domain	FALSE	0.16488	1	UP	Inf	0.0037058	UP	Inf	0.0022682	FALSE	#NAME?	0.74601
	2-3k.c16159/1/2918	1.01667	0.933333	1.72667	2.58667	0	0.0933333	0.35	2912	297832462	XP_002884113.1	3374	0	PHD finger family protein [Arabidopsis lyrata subsp. lyrata]>gi|297329953|gb|EFH60372.1| PHD finger family protein [Arabidopsis lyrata subsp. lyrata]	30680212	NM_179640.1	1895	0	Arabidopsis thaliana PHD finger, SWIB/MDM2 and GYF domain-containing protein mRNA, complete cds	--	--	--	--	Q9SD34	798	2.3e-83	Zinc finger CCCH domain-containing protein 44 OS=Arabidopsis thaliana GN=At3g51120 PE=2 SV=3	PF02201//PF01213//PF05038//PF16006//PF02213//PF02166	SWIB/MDM2 domain//Adenylate cyclase associated (CAP) N terminal//Cytochrome Cytochrome b558 alpha-subunit//Nucleolar and spindle-associated protein//GYF domain//Androgen receptor	GO:0000281//GO:0040001//GO:0030521//GO:0007165//GO:0000226//GO:0007010//GO:0006355	mitotic cytokinesis//establishment of mitotic spindle localization//androgen receptor signaling pathway//signal transduction//microtubule cytoskeleton organization//cytoskeleton organization//regulation of transcription, DNA-templated	GO:0005496//GO:0020037//GO:0003779//GO:0005515//GO:0046872//GO:0008270//GO:0003677//GO:0004882	steroid binding//heme binding//actin binding//protein binding//metal ion binding//zinc ion binding//DNA binding//androgen receptor activity	GO:0005634//GO:0005874//GO:0005819	nucleus//microtubule//spindle	--	--	FALSE	-2.4659	1	FALSE	-1.5318	0.96068	FALSE	1.6038	0.94665	FALSE	#NAME?	0.79058
	2-3k.c16241/1/2865	2.20667	1.5	2.37333	1.62333	4.74	0.563333	1.26333	2864	297832462	XP_002884113.1	3364	0	PHD finger family protein [Arabidopsis lyrata subsp. lyrata]>gi|297329953|gb|EFH60372.1| PHD finger family protein [Arabidopsis lyrata subsp. lyrata]	297832461	XM_002884067.1	1066	0	Arabidopsis lyrata subsp. lyrata PHD finger family protein, mRNA	--	--	--	--	Q9SD34	845	8e-89	Zinc finger CCCH domain-containing protein 44 OS=Arabidopsis thaliana GN=At3g51120 PE=2 SV=3	PF02213//PF00643//PF05038//PF02201	GYF domain//B-box zinc finger//Cytochrome Cytochrome b558 alpha-subunit//SWIB/MDM2 domain	--	--	GO:0008270//GO:0005515//GO:0046872//GO:0020037	zinc ion binding//protein binding//metal ion binding//heme binding	GO:0005622	intracellular	--	--	FALSE	-1.0281	1	FALSE	-0.98273	0.84582	FALSE	-0.33383	1	FALSE	1.0606	0.95901
	2-3k.c7343/1/3030	0	1.89333	0.736667	1.06667	0	0.0666667	3.27667	3030	565478354	XP_006296817.1	4121	0	hypothetical protein CARUB_v10012799mg [Capsella rubella]>gi|482565526|gb|EOA29715.1| hypothetical protein CARUB_v10012799mg [Capsella rubella]	565478353	XM_006296755.1	2258	0	Capsella rubella hypothetical protein (CARUB_v10012799mg) mRNA, complete cds	--	--	--	--	Q9SIV5	3935	0	Zinc finger CCCH domain-containing protein 19 OS=Arabidopsis thaliana GN=NERD PE=1 SV=3	PF00642//PF02201//PF02213//PF03126	Zinc finger C-x8-C-x5-C-x3-H type (and similar)//SWIB/MDM2 domain//GYF domain//Plus-3 domain	--	--	GO:0046872//GO:0005515//GO:0003677	metal ion binding//protein binding//DNA binding	--	--	--	--	FALSE	2.1015	1	UP	Inf	0.0025121	UP	Inf	0.029714	FALSE	#NAME?	0.6482
	2-3k.c9784/1/2942	0.0666667	2.69333	3.4	8.13667	0.173333	7.57	7.68	2931	297832462	XP_002884113.1	3364	0	PHD finger family protein [Arabidopsis lyrata subsp. lyrata]>gi|297329953|gb|EFH60372.1| PHD finger family protein [Arabidopsis lyrata subsp. lyrata]	297832461	XM_002884067.1	1066	0	Arabidopsis lyrata subsp. lyrata PHD finger family protein, mRNA	--	--	--	--	Q9SD34	845	8.1e-89	Zinc finger CCCH domain-containing protein 44 OS=Arabidopsis thaliana GN=At3g51120 PE=2 SV=3	PF05038//PF02201//PF00643//PF02213	Cytochrome Cytochrome b558 alpha-subunit//SWIB/MDM2 domain//B-box zinc finger//GYF domain	--	--	GO:0008270//GO:0020037//GO:0005515//GO:0046872	zinc ion binding//heme binding//protein binding//metal ion binding	GO:0005622	intracellular	--	--	FALSE	1.1516	1	UP	7.0013	0.013674	UP	7.0509	0.0092461	FALSE	-4.326	1
	3-6k.c15859/1/3943	1.20667	0.246667	1.73667	1.54333	0.153333	3.12667	0.19	3950	727501310	XP_010426653.1	5425	0	PREDICTED: zinc finger CCCH domain-containing protein 44 [Camelina sativa]	685362982	XM_009117541.1	2303	0	PREDICTED: Brassica rapa zinc finger CCCH domain-containing protein 44-like (LOC103841028), transcript variant X2, mRNA	--	--	--	--	Q9SD34	5352	0	Zinc finger CCCH domain-containing protein 44 OS=Arabidopsis thaliana GN=At3g51120 PE=2 SV=3	PF00643//PF02178//PF02201//PF00642//PF03126//PF02213	B-box zinc finger//AT hook motif//SWIB/MDM2 domain//Zinc finger C-x8-C-x5-C-x3-H type (and similar)//Plus-3 domain//GYF domain	--	--	GO:0046872//GO:0005515//GO:0008270//GO:0003677	metal ion binding//protein binding//zinc ion binding//DNA binding	GO:0005622	intracellular	--	--	FALSE	-3.0556	1	FALSE	-2.5479	0.59719	FALSE	0.33977	1	FALSE	-3.4885	0.94129
	3-6k.c22353/18/4069	1.10333	3.45667	0.37	1.02	1.06	0	0	4069	565465082	XP_006290505.1	5481	0	hypothetical protein CARUB_v10016583mg [Capsella rubella]>gi|482559212|gb|EOA23403.1| hypothetical protein CARUB_v10016583mg [Capsella rubella]	685362982	XM_009117541.1	2303	0	PREDICTED: Brassica rapa zinc finger CCCH domain-containing protein 44-like (LOC103841028), transcript variant X2, mRNA	--	--	--	--	Q9SD34	5408	0	Zinc finger CCCH domain-containing protein 44 OS=Arabidopsis thaliana GN=At3g51120 PE=2 SV=3	PF02213//PF03126//PF00643//PF02178//PF02201//PF00642	GYF domain//Plus-3 domain//B-box zinc finger//AT hook motif//SWIB/MDM2 domain//Zinc finger C-x8-C-x5-C-x3-H type (and similar)	--	--	GO:0008270//GO:0003677//GO:0046872//GO:0005515	zinc ion binding//DNA binding//metal ion binding//protein binding	GO:0005622	intracellular	--	--	FALSE	#NAME?	1	FALSE	#NAME?	0.12975	FALSE	0.046475	1	FALSE	1.5983	1
C2C2-CO-like	1-2k.c17974/1/2094	1.50667	3.01333	5.87667	7.76	5.70333	1.66667	1.53667	2031	727630696	XP_010486334.1	1656	3.7e-182	PREDICTED: zinc finger protein CONSTANS-LIKE 9-like [Camelina sativa]	727630695	XM_010488032.1	1109	0	PREDICTED: Camelina sativa zinc finger protein CONSTANS-LIKE 9-like (LOC104764491), mRNA	--	--	--	--	Q9SSE5	1635	1.4e-180	Zinc finger protein CONSTANS-LIKE 9 OS=Arabidopsis thaliana GN=COL9 PE=2 SV=1	PF00643//PF06203	B-box zinc finger//CCT motif	--	--	GO:0008270//GO:0005515	zinc ion binding//protein binding	GO:0005622	intracellular	--	--	FALSE	-1.9687	1	FALSE	0.009411	1	UP	2.4242	0.034054	FALSE	-0.024108	1
	1-2k.c24360/2/1365	184.433	162.44	36.7133	19.0033	7.91	48.11	34.8667	1368	565433611	XP_006280689.1	1646	3.6e-181	hypothetical protein CARUB_v10026653mg [Capsella rubella]>gi|482549393|gb|EOA13587.1| hypothetical protein CARUB_v10026653mg [Capsella rubella]	565433610	XM_006280627.1	811	0	Capsella rubella hypothetical protein (CARUB_v10026653mg) mRNA, complete cds	--	--	--	--	Q9FHH8	1569	4.2e-173	Zinc finger protein CONSTANS-LIKE 5 OS=Arabidopsis thaliana GN=COL5 PE=2 SV=2	PF00643//PF06203	B-box zinc finger//CCT motif	--	--	GO:0005515//GO:0008270	protein binding//zinc ion binding	GO:0005622	intracellular	--	--	FALSE	-0.074826	1	FALSE	-2.4339	0.13175	DOWN	-3.2581	0.031289	FALSE	-2.1884	0.14035
	1-2k.c28049/2/1623	70.59	53.17	30.22	29.24	27.05	19.0333	17.6467	1632	12321500	AAG50803.1	1781	9.4e-197	zinc finger protein, putative [Arabidopsis thaliana]	727575492	XM_010462076.1	1072	0	PREDICTED: Camelina sativa zinc finger protein CONSTANS-LIKE 16-like (LOC104741266), transcript variant X1, mRNA	--	--	--	--	Q8RWD0	1781	1.3e-197	Zinc finger protein CONSTANS-LIKE 16 OS=Arabidopsis thaliana GN=COL16 PE=2 SV=2	PF00569//PF15003//PF00643//PF01412//PF06203	Zinc finger, ZZ type//HAUS augmin-like complex subunit 2//B-box zinc finger//Putative GTPase activating protein for Arf//CCT motif	GO:0051225//GO:0031023	spindle assembly//microtubule organizing center organization	GO:0005515//GO:0005096//GO:0008270	protein binding//GTPase activator activity//zinc ion binding	GO:0005622	intracellular	--	--	FALSE	-0.85883	1	DOWN	-2.0538	0.041909	FALSE	-1.2147	0.17382	FALSE	-0.152	1
	1-2k.c29191/2/1579	99.6033	29.9033	23.41	17.71	4.66667	2.56	3.96333	1559	727595640	XP_010470801.1	1680	4.6e-185	PREDICTED: zinc finger protein CONSTANS-LIKE 6-like isoform X1 [Camelina sativa]>gi|727595642|ref|XP_010470802.1| PREDICTED: zinc finger protein CONSTANS-LIKE 6-like isoform X2 [Camelina sativa]	727595639	XM_010472499.1	1073	0	PREDICTED: Camelina sativa zinc finger protein CONSTANS-LIKE 6-like (LOC104750670), transcript variant X1, mRNA	--	--	--	--	Q8LG76	1540	1.1e-169	Zinc finger protein CONSTANS-LIKE 6 OS=Arabidopsis thaliana GN=COL6 PE=2 SV=2	PF00643//PF01412//PF06203	B-box zinc finger//Putative GTPase activating protein for Arf//CCT motif	--	--	GO:0008270//GO:0005096//GO:0005515	zinc ion binding//GTPase activator activity//protein binding	GO:0005622	intracellular	--	--	FALSE	-2.6353	0.56101	DOWN	-4.6921	2.8535e-07	DOWN	-2.4595	0.0014296	FALSE	-2.3363	0.36923
	1-2k.c29548/2/1659	67.0033	59.0967	29.6467	26.7733	33.8533	16.6733	17.46	1638	12321500	AAG50803.1	1735	2e-191	zinc finger protein, putative [Arabidopsis thaliana]	727575492	XM_010462076.1	1056	0	PREDICTED: Camelina sativa zinc finger protein CONSTANS-LIKE 16-like (LOC104741266), transcript variant X1, mRNA	--	--	--	--	Q8RWD0	1735	2.9e-192	Zinc finger protein CONSTANS-LIKE 16 OS=Arabidopsis thaliana GN=COL16 PE=2 SV=2	PF15003//PF00569//PF01412//PF06203//PF00643	HAUS augmin-like complex subunit 2//Zinc finger, ZZ type//Putative GTPase activating protein for Arf//CCT motif//B-box zinc finger	GO:0051225//GO:0031023	spindle assembly//microtubule organizing center organization	GO:0005515//GO:0005096//GO:0008270	protein binding//GTPase activator activity//zinc ion binding	GO:0005622	intracellular	--	--	FALSE	-0.85906	1	DOWN	-2.0223	0.047393	FALSE	-1.2635	0.14825	FALSE	0.21069	1
	1-2k.c3574/2/1627	28.63	33.3033	40.6867	10.0467	10.4133	9.05667	12.6967	1627	727645399	XP_010493639.1	1739	7e-192	PREDICTED: zinc finger protein CONSTANS-LIKE 10 [Camelina sativa]>gi|727645402|ref|XP_010493640.1| PREDICTED: zinc finger protein CONSTANS-LIKE 10 [Camelina sativa]	727536185	XM_010443943.1	987	0	PREDICTED: Camelina sativa zinc finger protein CONSTANS-LIKE 10-like (LOC104725310), transcript variant X1, mRNA	--	--	--	--	Q9LUA9	1657	3.1e-183	Zinc finger protein CONSTANS-LIKE 10 OS=Arabidopsis thaliana GN=COL10 PE=1 SV=1	PF06203//PF00643	CCT motif//B-box zinc finger	--	--	GO:0005515//GO:0008270	protein binding//zinc ion binding	GO:0005622	intracellular	--	--	FALSE	-1.667	0.85744	FALSE	-1.0955	0.53482	FALSE	-1.3693	0.32298	DOWN	-1.9362	0.0058341
	1-2k.c6597/9/1867	21.9767	27.1267	37.0833	29.94	14.8033	4.60667	4.20667	1838	727630696	XP_010486334.1	1656	3.3e-182	PREDICTED: zinc finger protein CONSTANS-LIKE 9-like [Camelina sativa]	727630695	XM_010488032.1	1109	0	PREDICTED: Camelina sativa zinc finger protein CONSTANS-LIKE 9-like (LOC104764491), mRNA	--	--	--	--	Q9SSE5	1635	1.3e-180	Zinc finger protein CONSTANS-LIKE 9 OS=Arabidopsis thaliana GN=COL9 PE=2 SV=1	PF06203//PF00643	CCT motif//B-box zinc finger	--	--	GO:0008270//GO:0005515	zinc ion binding//protein binding	GO:0005622	intracellular	--	--	DOWN	-3.1573	0.031098	DOWN	-2.3515	0.032771	FALSE	0.56039	0.89776	FALSE	-1.2804	0.14964
	1-2k.c8541/1/1697	16.0333	5.96	4.34333	3.08333	1.57	1.59667	1.05667	1708	727595640	XP_010470801.1	1680	5.1e-185	PREDICTED: zinc finger protein CONSTANS-LIKE 6-like isoform X1 [Camelina sativa]>gi|727595642|ref|XP_010470802.1| PREDICTED: zinc finger protein CONSTANS-LIKE 6-like isoform X2 [Camelina sativa]	727595639	XM_010472499.1	1119	0	PREDICTED: Camelina sativa zinc finger protein CONSTANS-LIKE 6-like (LOC104750670), transcript variant X1, mRNA	--	--	--	--	Q8LG76	1540	1.2e-169	Zinc finger protein CONSTANS-LIKE 6 OS=Arabidopsis thaliana GN=COL6 PE=2 SV=2	PF00643//PF01412//PF06203	B-box zinc finger//Putative GTPase activating protein for Arf//CCT motif	--	--	GO:0005096//GO:0008270//GO:0005515	GTPase activator activity//zinc ion binding//protein binding	GO:0005622	intracellular	--	--	FALSE	-2.1134	1	DOWN	-4.0191	0.040387	FALSE	-2.3666	0.25217	FALSE	-1.4655	0.98213
	1-2k.c8685/3/1587	155.703	37.9	28.9167	19.9467	9.42667	4.97333	6.03667	1574	727479285	XP_010415472.1	1612	3.6e-177	PREDICTED: zinc finger protein CONSTANS-LIKE 6-like [Camelina sativa]	727595639	XM_010472499.1	1070	0	PREDICTED: Camelina sativa zinc finger protein CONSTANS-LIKE 6-like (LOC104750670), transcript variant X1, mRNA	--	--	--	--	Q8LG76	1506	9.8e-166	Zinc finger protein CONSTANS-LIKE 6 OS=Arabidopsis thaliana GN=COL6 PE=2 SV=2	PF00643//PF06203//PF01412	B-box zinc finger//CCT motif//Putative GTPase activating protein for Arf	--	--	GO:0005515//GO:0008270//GO:0005096	protein binding//zinc ion binding//GTPase activator activity	GO:0005622	intracellular	--	--	FALSE	-2.336	0.35135	DOWN	-4.7437	5.8432e-08	DOWN	-2.9253	7.2753e-05	FALSE	-1.6209	0.4273
GRAS	1-2k.c11160/1/2148	21.5967	13.06	14.35	6.85	4.17667	5.89667	6.70667	2073	727425364	XP_010455040.1	2613	4e-293	PREDICTED: scarecrow-like protein 11 [Camelina sativa]	297793502	XM_002864590.1	1448	0	Arabidopsis lyrata subsp. lyrata hypothetical protein, mRNA	--	--	--	--	Q9LTI5	2572	3.2e-289	Scarecrow-like protein 11 OS=Arabidopsis thaliana GN=SCL11 PE=2 SV=1	--	--	--	--	--	--	--	--	--	--	FALSE	-1.0529	1	FALSE	-1.6234	0.206	FALSE	-1.59	0.084314	FALSE	-1.7597	0.12366
	1-2k.c1473/10/1808	45.2933	29.9533	37.9733	13.11	23.7167	21.9067	24.9233	1811	297795455	XP_002865612.1	2295	2.6e-256	hypothetical protein ARALYDRAFT_917700 [Arabidopsis lyrata subsp. lyrata]>gi|297311447|gb|EFH41871.1| hypothetical protein ARALYDRAFT_917700 [Arabidopsis lyrata subsp. lyrata]	145362679	NM_203174.2	1276	0	Arabidopsis thaliana GRAS family transcription factor mRNA, complete cds	--	--	--	--	Q9LDL7	2267	6.5e-254	Scarecrow-like transcription factor PAT1 OS=Arabidopsis thaliana GN=PAT1 PE=2 SV=1	--	--	GO:0006355	regulation of transcription, DNA-templated	--	--	--	--	--	--	FALSE	-0.63066	1	FALSE	-0.88156	0.6818	DOWN	-1.6897	0.038333	FALSE	-0.63694	0.94439
	1-2k.c21992/2/1765	9.66333	23.19	24.1433	33.9233	27.7567	30.3267	15.17	1657	565442928	XP_006283643.1	2105	2.6e-234	hypothetical protein CARUB_v10004700mg [Capsella rubella]>gi|482552348|gb|EOA16541.1| hypothetical protein CARUB_v10004700mg [Capsella rubella]	727522615	XM_010439010.1	1153	0	PREDICTED: Camelina sativa scarecrow-like protein 15 (LOC104721101), transcript variant X2, mRNA	--	--	--	--	O23210	2099	1.8e-234	Scarecrow-like protein 15 OS=Arabidopsis thaliana GN=SCL15 PE=2 SV=3	--	--	--	--	--	--	--	--	--	--	FALSE	-0.73896	1	FALSE	0.61077	0.93663	UP	1.8772	0.017466	FALSE	0.21112	1
	1-2k.c22424/1/1958	0.113333	8.98667	6.19333	0	0.04	11.9967	11.4367	1937	21593017	AAM64966.1	2552	4.4e-286	scarecrow-like protein [Arabidopsis thaliana]	297815821	XM_002875748.1	1250	0	Arabidopsis lyrata subsp. lyrata scarecrow transcription factor family protein, mRNA	--	--	--	--	Q9SNB8	2554	3.6e-287	Scarecrow-like protein 30 OS=Arabidopsis thaliana GN=SCL30 PE=1 SV=1	PF09026//PF01370	Centromere protein B dimerisation domain//NAD dependent epimerase/dehydratase family	GO:0006355	regulation of transcription, DNA-templated	GO:0003682//GO:0050662//GO:0003677//GO:0003824	chromatin binding//coenzyme binding//DNA binding//catalytic activity	GO:0005634//GO:0000775//GO:0000785	nucleus//chromosome, centromeric region//chromatin	--	--	FALSE	0.87404	1	UP	6.6832	0.045486	FALSE	#NAME?	1	FALSE	-7.3341	0.91884
	1-2k.c22850/1/1580	2.89333	2.81667	7.58333	13.5133	2.32667	12.7667	9.63667	1579	565431925	XP_006280138.1	1897	3.2e-210	hypothetical protein CARUB_v10026035mg [Capsella rubella]>gi|482548842|gb|EOA13036.1| hypothetical protein CARUB_v10026035mg [Capsella rubella]	727623533	XM_010484312.1	1045	0	PREDICTED: Camelina sativa scarecrow-like protein 8 (LOC104761260), mRNA	--	--	--	--	Q9FYR7	1735	2.8e-192	Scarecrow-like protein 8 OS=Arabidopsis thaliana GN=SCL8 PE=2 SV=1	--	--	--	--	--	--	--	--	--	--	FALSE	0.34203	1	FALSE	1.8143	0.44818	UP	2.2893	0.027444	FALSE	-1.7136	0.91884
	1-2k.c24354/1/1655	21.7233	17.6033	13.5333	5.20333	15.81	6.15	5.30333	1654	727438567	XP_010500634.1	2280	1.3e-254	PREDICTED: scarecrow-like protein 5 [Camelina sativa]	727578471	XM_010463609.1	1285	0	PREDICTED: Camelina sativa scarecrow-like protein 5 (LOC104742590), mRNA	--	--	--	--	Q8H125	2261	2.9e-253	Scarecrow-like protein 5 OS=Arabidopsis thaliana GN=SCL5 PE=2 SV=1	--	--	--	--	--	--	--	--	--	--	FALSE	-1.4736	1	DOWN	-2.2137	0.042591	FALSE	-1.9435	0.089338	FALSE	0.30085	1
	1-2k.c5119/2/1782	12.9067	14.3	9.56667	5.99	3.18667	5.59	3.35333	1769	297795455	XP_002865612.1	2366	1.5e-264	hypothetical protein ARALYDRAFT_917700 [Arabidopsis lyrata subsp. lyrata]>gi|297311447|gb|EFH41871.1| hypothetical protein ARALYDRAFT_917700 [Arabidopsis lyrata subsp. lyrata]	727536140	XM_010443932.1	1259	0	PREDICTED: Camelina sativa scarecrow-like transcription factor PAT1 (LOC104725298), transcript variant X3, mRNA	--	--	--	--	Q9LDL7	2338	3.7e-262	Scarecrow-like transcription factor PAT1 OS=Arabidopsis thaliana GN=PAT1 PE=2 SV=1	--	--	GO:0006355	regulation of transcription, DNA-templated	--	--	--	--	--	--	FALSE	-1.569	1	FALSE	-2.0098	0.17415	FALSE	-1.064	0.55847	FALSE	-1.5546	0.4696
	1-2k.c8444/1/1724	0	2.55333	0	4.10667	0	1.27667	0	1725	297795455	XP_002865612.1	2295	2.5e-256	hypothetical protein ARALYDRAFT_917700 [Arabidopsis lyrata subsp. lyrata]>gi|297311447|gb|EFH41871.1| hypothetical protein ARALYDRAFT_917700 [Arabidopsis lyrata subsp. lyrata]	727536140	XM_010443932.1	1234	0	PREDICTED: Camelina sativa scarecrow-like transcription factor PAT1 (LOC104725298), transcript variant X3, mRNA	--	--	--	--	Q9LDL7	2267	6.2e-254	Scarecrow-like transcription factor PAT1 OS=Arabidopsis thaliana GN=PAT1 PE=2 SV=1	--	--	GO:0006355	regulation of transcription, DNA-templated	--	--	--	--	--	--	FALSE	NA	NA	FALSE	NA	NA	UP	Inf	0.0077026	FALSE	NA	NA
	1-2k.c9058/6/2047	50.3267	13.9967	20.81	19.9	22.3567	7.84333	5.26333	2045	21593017	AAM64966.1	2552	4.7e-286	scarecrow-like protein [Arabidopsis thaliana]	332640072	CP002686.1	1262	0	Arabidopsis thaliana chromosome 3, complete sequence	--	--	--	--	Q9SNB8	2554	3.8e-287	Scarecrow-like protein 30 OS=Arabidopsis thaliana GN=SCL30 PE=1 SV=1	PF01370//PF09026	NAD dependent epimerase/dehydratase family//Centromere protein B dimerisation domain	GO:0006355	regulation of transcription, DNA-templated	GO:0050662//GO:0003677//GO:0003682//GO:0003824	coenzyme binding//DNA binding//chromatin binding//catalytic activity	GO:0005634//GO:0000775//GO:0000785	nucleus//chromosome, centromeric region//chromatin	--	--	FALSE	-2.0097	1	DOWN	-3.3452	0.00023261	FALSE	-1.2907	0.13689	FALSE	0.17322	1
RWP-RK	1-2k.c28207/2/1963	5.81	3.59667	1.88	0.746667	1.62	0.756667	0.01	1964	727514972	XP_010433823.1	2759	4.5e-310	PREDICTED: protein NLP7-like [Camelina sativa]	727552354	XM_010450321.1	1518	0	PREDICTED: Camelina sativa protein NLP7 (LOC104731061), transcript variant X2, mRNA	--	--	--	--	Q84TH9	2744	3.4e-309	Protein NLP7 OS=Arabidopsis thaliana GN=NLP7 PE=1 SV=2	PF00564	PB1 domain	--	--	GO:0005515	protein binding	--	--	--	--	FALSE	-7.095	0.27474	DOWN	-8.8093	1.058e-05	DOWN	-2.88	0.033553	FALSE	-0.14351	1
	1-2k.c29869/1/1739	0	3.07	2.58333	5.64333	0.33	3.65333	4.33	1746	727514972	XP_010433823.1	2218	2.1e-247	PREDICTED: protein NLP7-like [Camelina sativa]	727527449	XM_010440795.1	1296	0	PREDICTED: Camelina sativa protein NLP7-like (LOC104722597), mRNA	--	--	--	--	Q84TH9	2203	1.6e-246	Protein NLP7 OS=Arabidopsis thaliana GN=NLP7 PE=1 SV=2	PF00564	PB1 domain	--	--	GO:0005515	protein binding	--	--	--	--	FALSE	0.69468	1	UP	Inf	0.0001074	UP	Inf	0.0041524	FALSE	-3.0265	1
	2-3k.c10362/1/3248	1	1.05333	0.703333	0.223333	0.553333	0.713333	0	3224	565471674	XP_006293639.1	3968	0	hypothetical protein CARUB_v10022595mg [Capsella rubella]>gi|482562347|gb|EOA26537.1| hypothetical protein CARUB_v10022595mg [Capsella rubella]	565471673	XM_006293577.1	1991	0	Capsella rubella hypothetical protein (CARUB_v10022595mg) mRNA, complete cds	--	--	--	--	O22864	3934	0	Protein NLP8 OS=Arabidopsis thaliana GN=NLP8 PE=2 SV=1	PF04584//PF00564//PF13185	Poxvirus A28 family//PB1 domain//GAF domain	GO:0016032	viral process	GO:0005515	protein binding	GO:0019031	viral envelope	--	--	FALSE	#NAME?	0.53384	DOWN	#NAME?	0.029956	FALSE	-2.0299	0.67291	FALSE	-0.24941	1
	2-3k.c10913/2/2978	0	0	0.00333333	0	0	0	1.28667	2971	15233656	NP_194133.1	4222	0	NIN like protein 7 [Arabidopsis thaliana]>gi|313471382|sp|Q84TH9.2|NLP7_ARATH RecName: Full=Protein NLP7; Short=AtNLP7; AltName: Full=NIN-like protein 7; AltName: Full=Nodule inception protein-like protein 7>gi|2262113|gb|AAB63621.1| unknown protein [Arabidopsis thaliana]>gi|5668630|emb|CAB51645.1| putative protein [Arabidopsis thaliana]>gi|7269251|emb|CAB81320.1| putative protein [Arabidopsis th…	727552354	XM_010450321.1	2319	0	PREDICTED: Camelina sativa protein NLP7 (LOC104731061), transcript variant X2, mRNA	--	--	--	--	Q84TH9	4222	0	Protein NLP7 OS=Arabidopsis thaliana GN=NLP7 PE=1 SV=2	PF13185//PF00564	GAF domain//PB1 domain	GO:0010167//GO:0010118//GO:0042128//GO:0009414	response to nitrate//stomatal movement//nitrate assimilation//response to water deprivation	GO:0003700//GO:0005515	transcription factor activity, sequence-specific DNA binding//protein binding	GO:0005667//GO:0005634	transcription factor complex//nucleus	--	--	FALSE	Inf	0.075988	UP	Inf	0.0091853	FALSE	NA	NA	FALSE	NA	NA
	2-3k.c15976/1/3255	0	1.04	0.99	1.41667	0	2.16667	1.13333	3269	565471674	XP_006293639.1	3148	0	hypothetical protein CARUB_v10022595mg [Capsella rubella]>gi|482562347|gb|EOA26537.1| hypothetical protein CARUB_v10022595mg [Capsella rubella]	565471673	XM_006293577.1	1545	0	Capsella rubella hypothetical protein (CARUB_v10022595mg) mRNA, complete cds	--	--	--	--	O22864	3103	0	Protein NLP8 OS=Arabidopsis thaliana GN=NLP8 PE=2 SV=1	PF00564	PB1 domain	--	--	GO:0005515	protein binding	--	--	--	--	FALSE	0.13914	1	UP	Inf	0.010119	UP	Inf	0.0082832	FALSE	#NAME?	0.7801
	2-3k.c18378/1/3285.1	0.346667	1.07333	0.603333	0.52	0	1.02	1.4	2051	565471674	XP_006293639.1	2518	4.1e-282	hypothetical protein CARUB_v10022595mg [Capsella rubella]>gi|482562347|gb|EOA26537.1| hypothetical protein CARUB_v10022595mg [Capsella rubella]	727449167	XM_010507929.1	807	0	PREDICTED: Camelina sativa protein NLP8 (LOC104782867), mRNA	--	--	--	--	O22864	2455	1.2e-275	Protein NLP8 OS=Arabidopsis thaliana GN=NLP8 PE=2 SV=1	PF00564//PF04218	PB1 domain//CENP-B N-terminal DNA-binding domain	--	--	GO:0003677//GO:0005515	DNA binding//protein binding	--	--	--	--	FALSE	1.2318	1	FALSE	2.3117	0.68407	FALSE	0.8194	1	FALSE	#NAME?	0.79166
	2-3k.c26023/1/6380.1	1.13667	0.646667	0.933333	0.79	0.336667	0	0	3081	727574294	XP_010459754.1	3856	0	PREDICTED: protein NLP4 isoform X1 [Camelina sativa]	22329694	NM_101915.2	2154	0	Arabidopsis thaliana nodule inception protein-like protein 4 mRNA, complete cds	--	--	--	--	Q9LE38	3791	0	Protein NLP4 OS=Arabidopsis thaliana GN=NLP4 PE=2 SV=1	PF13185//PF00564//PF13833//PF02943	GAF domain//PB1 domain//EF-hand domain pair//Ferredoxin thioredoxin reductase catalytic beta chain	GO:0055114	oxidation-reduction process	GO:0005509//GO:0005515//GO:0016730	calcium ion binding//protein binding//oxidoreductase activity, acting on iron-sulfur proteins as donors	--	--	--	--	FALSE	#NAME?	0.49554	DOWN	#NAME?	0.013768	FALSE	-0.51417	1	FALSE	-1.4635	1
	2-3k.c27100/4/3140	2.66667	1.71667	0.0833333	1.39	0.0666667	0.326667	0	3141	15233656	NP_194133.1	4487	0	NIN like protein 7 [Arabidopsis thaliana]>gi|313471382|sp|Q84TH9.2|NLP7_ARATH RecName: Full=Protein NLP7; Short=AtNLP7; AltName: Full=NIN-like protein 7; AltName: Full=Nodule inception protein-like protein 7>gi|2262113|gb|AAB63621.1| unknown protein [Arabidopsis thaliana]>gi|5668630|emb|CAB51645.1| putative protein [Arabidopsis thaliana]>gi|7269251|emb|CAB81320.1| putative protein [Arabidopsis th…	727552354	XM_010450321.1	2405	0	PREDICTED: Camelina sativa protein NLP7 (LOC104731061), transcript variant X2, mRNA	--	--	--	--	Q84TH9	4487	0	Protein NLP7 OS=Arabidopsis thaliana GN=NLP7 PE=1 SV=2	PF13185//PF00564	GAF domain//PB1 domain	GO:0010167//GO:0010118//GO:0009414//GO:0042128	response to nitrate//stomatal movement//response to water deprivation//nitrate assimilation	GO:0003700//GO:0005515	transcription factor activity, sequence-specific DNA binding//protein binding	GO:0005667//GO:0005634	transcription factor complex//nucleus	--	--	FALSE	#NAME?	1	DOWN	#NAME?	0.032594	FALSE	-0.91374	1	FALSE	-0.38543	1
	2-3k.c3523/4/3036	0.81	0	0.09	0	0.206667	0.16	0.613333	3036	727574294	XP_010459754.1	3850	0	PREDICTED: protein NLP4 isoform X1 [Camelina sativa]	565498239	XM_006306697.1	2226	0	Capsella rubella hypothetical protein (CARUB_v10008300mg) mRNA, complete cds	--	--	--	--	Q9LE38	3803	0	Protein NLP4 OS=Arabidopsis thaliana GN=NLP4 PE=2 SV=1	PF13185//PF00564//PF03810//PF02943	GAF domain//PB1 domain//Importin-beta N-terminal domain//Ferredoxin thioredoxin reductase catalytic beta chain	GO:0055114//GO:0006886	oxidation-reduction process//intracellular protein transport	GO:0016730//GO:0008536//GO:0005515	oxidoreductase activity, acting on iron-sulfur proteins as donors//Ran GTPase binding//protein binding	--	--	--	--	FALSE	2.7108	1	FALSE	-0.55208	1	DOWN	#NAME?	0.043584	FALSE	1.3453	1
WRKY	1-2k.c10288/3/1745	8.63	22.5833	8.98667	5.94667	3.84333	8.99333	8.22667	1745	565475878	XP_006295580.1	1421	5.6e-155	hypothetical protein CARUB_v10024687mg [Capsella rubella]>gi|482564288|gb|EOA28478.1| hypothetical protein CARUB_v10024687mg [Capsella rubella]	727476935	XM_010415985.1	916	0	PREDICTED: Camelina sativa probable WRKY transcription factor 25 (LOC104700464), mRNA	K13423	WRKY25	WRKY transcription factor 25	http://www.genome.jp/dbget-bin/www_bget?ko:K13423	O22921	1374	2.2e-150	Probable WRKY transcription factor 25 OS=Arabidopsis thaliana GN=WRKY25 PE=1 SV=1	PF02744//PF01582//PF03106	Galactose-1-phosphate uridyl transferase, C-terminal domain//TIR domain//WRKY DNA -binding domain	GO:0006355//GO:0007165//GO:0009117//GO:0006012	regulation of transcription, DNA-templated//signal transduction//nucleotide metabolic process//galactose metabolic process	GO:0043565//GO:0008108//GO:0005515//GO:0003700	sequence-specific DNA binding//UDP-glucose:hexose-1-phosphate uridylyltransferase activity//protein binding//transcription factor activity, sequence-specific DNA binding	GO:0005667	transcription factor complex	--	--	FALSE	-0.058143	1	FALSE	-0.03723	1	FALSE	-0.49636	1	FALSE	-1.1682	1
	1-2k.c10931/8/1915	104.793	47.3267	55.7133	26.6533	29.0033	55.5167	96.42	1905	565471328	XP_006293466.1	2024	7.3e-225	hypothetical protein CARUB_v10023006mg [Capsella rubella]>gi|482562174|gb|EOA26364.1| hypothetical protein CARUB_v10023006mg [Capsella rubella]	565471327	XM_006293404.1	1372	0	Capsella rubella hypothetical protein (CARUB_v10023006mg) mRNA, complete cds	K13424	WRKY33	WRKY transcription factor 33	http://www.genome.jp/dbget-bin/www_bget?ko:K13424	Q8S8P5	2008	7.3e-224	Probable WRKY transcription factor 33 OS=Arabidopsis thaliana GN=WRKY33 PE=1 SV=2	PF03106	WRKY DNA -binding domain	GO:0006355	regulation of transcription, DNA-templated	GO:0003700//GO:0043565	transcription factor activity, sequence-specific DNA binding//sequence-specific DNA binding	GO:0005667	transcription factor complex	--	--	FALSE	0.88855	1	FALSE	-0.029007	1	DOWN	-1.9283	0.0088672	FALSE	-0.90353	0.55944
	1-2k.c20642/2/1717	13.2733	39.0267	21.2267	22.2033	10.4767	17.22	4.69	1721	565475878	XP_006295580.1	1827	4.6e-202	hypothetical protein CARUB_v10024687mg [Capsella rubella]>gi|482564288|gb|EOA28478.1| hypothetical protein CARUB_v10024687mg [Capsella rubella]	727476935	XM_010415985.1	1181	0	PREDICTED: Camelina sativa probable WRKY transcription factor 25 (LOC104700464), mRNA	K13423	WRKY25	WRKY transcription factor 25	http://www.genome.jp/dbget-bin/www_bget?ko:K13423	O22921	1817	9.3e-202	Probable WRKY transcription factor 25 OS=Arabidopsis thaliana GN=WRKY25 PE=1 SV=1	PF03106//PF02744//PF01582	WRKY DNA -binding domain//Galactose-1-phosphate uridyl transferase, C-terminal domain//TIR domain	GO:0006355//GO:0007165//GO:0009117//GO:0006012	regulation of transcription, DNA-templated//signal transduction//nucleotide metabolic process//galactose metabolic process	GO:0043565//GO:0008108//GO:0005515//GO:0003700	sequence-specific DNA binding//UDP-glucose:hexose-1-phosphate uridylyltransferase activity//protein binding//transcription factor activity, sequence-specific DNA binding	GO:0005667	transcription factor complex	--	--	FALSE	-2.3066	1	FALSE	-1.6746	0.23004	FALSE	0.80971	0.64595	FALSE	-0.95672	1
	1-2k.c22742/1/1191	142.953	186.217	78.88	33.4467	27.2167	64.49	40.9633	1191	727507553	XP_010429891.1	1272	7.2e-138	PREDICTED: probable WRKY transcription factor 40 isoform X1 [Camelina sativa]	727599815	XM_010474563.1	798	0	PREDICTED: Camelina sativa probable WRKY transcription factor 40 (LOC104752429), mRNA	--	--	--	--	Q9SAH7	1245	1.4e-135	Probable WRKY transcription factor 40 OS=Arabidopsis thaliana GN=WRKY40 PE=1 SV=1	PF03106//PF13851	WRKY DNA -binding domain//Growth-arrest specific micro-tubule binding	GO:0006355//GO:0048870	regulation of transcription, DNA-templated//cell motility	GO:0043565//GO:0003700	sequence-specific DNA binding//transcription factor activity, sequence-specific DNA binding	GO:0005667//GO:0031514	transcription factor complex//motile cilium	--	--	FALSE	-0.91858	1	FALSE	-1.7572	0.083528	DOWN	-2.0207	0.0032664	FALSE	-1.5006	0.22052
	1-2k.c29404/1/1794	2.99	11.8667	5.56333	0.58	2.54667	4.12	3.34667	1794	565492660	XP_006303969.1	2001	3.2e-222	hypothetical protein CARUB_v10008859mg [Capsella rubella]>gi|482572680|gb|EOA36867.1| hypothetical protein CARUB_v10008859mg [Capsella rubella]	565492659	XM_006303907.1	1351	0	Capsella rubella hypothetical protein (CARUB_v10008859mg) mRNA, complete cds	--	--	--	--	Q9XI90	1959	3.3e-218	Probable WRKY transcription factor 4 OS=Arabidopsis thaliana GN=WRKY4 PE=1 SV=2	PF03106	WRKY DNA -binding domain	GO:0006355	regulation of transcription, DNA-templated	GO:0003700//GO:0043565	transcription factor activity, sequence-specific DNA binding//sequence-specific DNA binding	GO:0005667	transcription factor complex	--	--	FALSE	-0.61659	1	FALSE	0.26648	1	FALSE	-2.3205	0.91649	FALSE	-1.0766	1
	1-2k.c32261/1/1785	5.39667	2.93667	3.21	2.54	4.36667	1.32333	0.05	1787	565492660	XP_006303969.1	1880	3.4e-208	hypothetical protein CARUB_v10008859mg [Capsella rubella]>gi|482572680|gb|EOA36867.1| hypothetical protein CARUB_v10008859mg [Capsella rubella]	565492659	XM_006303907.1	1368	0	Capsella rubella hypothetical protein (CARUB_v10008859mg) mRNA, complete cds	--	--	--	--	Q9XI90	1866	2e-207	Probable WRKY transcription factor 4 OS=Arabidopsis thaliana GN=WRKY4 PE=1 SV=2	PF03106	WRKY DNA -binding domain	GO:0006355	regulation of transcription, DNA-templated	GO:0003700//GO:0043565	transcription factor activity, sequence-specific DNA binding//sequence-specific DNA binding	GO:0005667	transcription factor complex	--	--	FALSE	-6.1206	0.18168	DOWN	-6.9358	0.00033868	FALSE	-0.98214	0.95991	FALSE	0.51869	1
	1-2k.c33815/1/1776	3.51	3.34667	5.39333	6.41333	18.5767	14.4767	8.39667	1775	297837197	XP_002886480.1	2011	2.2e-223	WRKY DNA-binding protein 6 [Arabidopsis lyrata subsp. lyrata]>gi|297332321|gb|EFH62739.1| WRKY DNA-binding protein 6 [Arabidopsis lyrata subsp. lyrata]	297837196	XM_002886434.1	1119	0	Arabidopsis lyrata subsp. lyrata WRKY DNA-binding protein 6 (WRKY6), mRNA	--	--	--	--	Q9C519	1973	7.8e-220	WRKY transcription factor 6 OS=Arabidopsis thaliana GN=WRKY6 PE=1 SV=1	PF06156//PF03106	Protein of unknown function (DUF972)//WRKY DNA -binding domain	GO:0006260//GO:0006355	DNA replication//regulation of transcription, DNA-templated	GO:0003700//GO:0043565	transcription factor activity, sequence-specific DNA binding//sequence-specific DNA binding	GO:0005667	transcription factor complex	--	--	FALSE	0.75812	1	FALSE	1.3705	0.83095	FALSE	0.96691	0.94845	FALSE	1.858	0.05461
	1-2k.c966/8/1896	114.883	57.34	63.1333	32.0433	37.5967	66.81	99.3533	1896	565471328	XP_006293466.1	2135	9.8e-238	hypothetical protein CARUB_v10023006mg [Capsella rubella]>gi|482562174|gb|EOA26364.1| hypothetical protein CARUB_v10023006mg [Capsella rubella]	565471327	XM_006293404.1	1421	0	Capsella rubella hypothetical protein (CARUB_v10023006mg) mRNA, complete cds	K13424	WRKY33	WRKY transcription factor 33	http://www.genome.jp/dbget-bin/www_bget?ko:K13424	Q8S8P5	2095	6e-234	Probable WRKY transcription factor 33 OS=Arabidopsis thaliana GN=WRKY33 PE=1 SV=2	PF03106	WRKY DNA -binding domain	GO:0006355	regulation of transcription, DNA-templated	GO:0043565//GO:0003700	sequence-specific DNA binding//transcription factor activity, sequence-specific DNA binding	GO:0005667	transcription factor complex	--	--	FALSE	0.7477	1	FALSE	-0.11424	1	DOWN	-1.7821	0.0094609	FALSE	-0.7078	0.84728
	2-3k.c16061/1/1338	5.29333	1.8	7.6	1.82	8.24	31.1167	15.1	1330	15226740	NP_181607.1	1492	2.5e-163	WRKY DNA-binding protein 54 [Arabidopsis thaliana]>gi|332278117|sp|Q93WU8.2|WRK54_ARATH RecName: Full=Probable WRKY transcription factor 54; AltName: Full=WRKY DNA-binding protein 54>gi|330254778|gb|AEC09872.1| WRKY DNA-binding protein 54 [Arabidopsis thaliana]	42569811	NM_129637.2	901	0	Arabidopsis thaliana WRKY DNA-binding protein 54 mRNA, complete cds	--	--	--	--	Q93WU8	1492	3.5e-164	Probable WRKY transcription factor 54 OS=Arabidopsis thaliana GN=WRKY54 PE=2 SV=2	PF03106	WRKY DNA -binding domain	GO:0042742//GO:1900056//GO:0010200//GO:0009867//GO:0050832//GO:0010310//GO:0009697//GO:0000165//GO:0010363//GO:0006355//GO:0009595//GO:0031348//GO:0002831//GO:0006612//GO:0043900//GO:0009862	defense response to bacterium//negative regulation of leaf senescence//response to chitin//jasmonic acid mediated signaling pathway//defense response to fungus//regulation of hydrogen peroxide metabolic process//salicylic acid biosynthetic process//MAPK cascade//regulation of plant-type hypersensitive response//regulation of transcription, DNA-templated//detection of biotic stimulus//negative reg…	GO:0043565//GO:0005515//GO:0003700	sequence-specific DNA binding//protein binding//transcription factor activity, sequence-specific DNA binding	GO:0005667//GO:0005634	transcription factor complex//nucleus	--	--	FALSE	1.0962	1	FALSE	1.765	0.87198	FALSE	-1.3433	0.93217	FALSE	0.1797	1
HMG	1-2k.c16667/1/1808	13.1633	7.51667	9.11667	1.41667	5.39333	4.41	4.52667	1778	8886929	AAF80615.1	208	2.6e-14	F2D10.18 [Arabidopsis thaliana]	--	--	--	--	--	--	--	--	--	P40619	164	4.6e-10	HMG1/2-like protein OS=Ipomoea nil PE=2 SV=1	--	--	--	--	--	--	--	--	KOG0381	HMG box-containing protein	FALSE	-1.1213	1	FALSE	-1.6961	0.21344	DOWN	-3.0868	0.0018003	FALSE	-0.66827	1
	1-2k.c33009/1/2038.2	350.627	297.81	258.71	227.303	173.55	168.24	135.683	894	727444756	XP_010503896.1	647	1.6e-65	PREDICTED: high mobility group B protein 1-like isoform X1 [Camelina sativa]	145339380	NM_115047.2	573	0	Arabidopsis thaliana high mobility group protein B1 mRNA, complete cds	K10802	HMGB1	high mobility group protein B1	http://www.genome.jp/dbget-bin/www_bget?ko:K10802	O49595	623	1.4e-63	High mobility group B protein 1 OS=Arabidopsis thaliana GN=HMGB1 PE=1 SV=1	PF07267//PF00957//PF04690//PF10717//PF09507//PF03153	Nucleopolyhedrovirus capsid protein P87//Synaptobrevin//YABBY protein//Occlusion-derived virus envelope protein ODV-E18//DNA polymerase subunit Cdc27//Transcription factor IIA, alpha/beta subunit	GO:0016192//GO:0007275//GO:0006260//GO:0006367	vesicle-mediated transport//multicellular organismal development//DNA replication//transcription initiation from RNA polymerase II promoter	--	--	GO:0016021//GO:0019028//GO:0005634//GO:0019031//GO:0005672	integral component of membrane//viral capsid//nucleus//viral envelope//transcription factor TFIIA complex	--	--	FALSE	-0.97721	1	FALSE	-1.3974	0.22469	FALSE	-0.54791	0.836	FALSE	-0.54201	0.94184
	1-2k.c8430/1/856	731.927	557.347	526.383	327.433	150.997	232.797	143.903	856	567149468	XP_006416373.1	505	4.5e-49	hypothetical protein EUTSA_v10009970mg, partial [Eutrema salsugineum]>gi|557094144|gb|ESQ34726.1| hypothetical protein EUTSA_v10009970mg, partial [Eutrema salsugineum]	727574308	XM_010461459.1	617	0	PREDICTED: Camelina sativa high mobility group B protein 2 (LOC104740766), mRNA	--	--	--	--	O49596	477	1.1e-46	High mobility group B protein 2 OS=Arabidopsis thaliana GN=HMGB2 PE=1 SV=1	PF06524	NOA36 protein	--	--	GO:0008270	zinc ion binding	GO:0005634	nucleus	--	--	FALSE	-1.9159	0.37909	DOWN	-2.3597	0.0067589	FALSE	-1.0631	0.20899	DOWN	-1.7571	0.00034175
	2-3k.c19159/1/742	350.203	394.867	285.597	186.813	115.953	168.06	149.777	743	565492478	XP_006303878.1	496	4.3e-48	hypothetical protein CARUB_v10012681mg [Capsella rubella]>gi|727434529|ref|XP_010498508.1| PREDICTED: high mobility group B protein 3 [Camelina sativa]>gi|727574307|ref|XP_010459760.1| PREDICTED: high mobility group B protein 3 [Camelina sativa]>gi|482572589|gb|EOA36776.1| hypothetical protein CARUB_v10012681mg [Capsella rubella]	727608389	XM_010479017.1	535	0	PREDICTED: Camelina sativa high mobility group B protein 3-like (LOC104756424), mRNA	--	--	--	--	P93047	476	1.3e-46	High mobility group B protein 3 OS=Arabidopsis thaliana GN=HMGB3 PE=1 SV=1	PF06524	NOA36 protein	--	--	GO:0008270	zinc ion binding	GO:0005634	nucleus	--	--	FALSE	-0.98998	1	FALSE	-1.2219	0.32191	FALSE	-0.7819	0.53325	FALSE	-1.2624	0.059109
	2-3k.c21687/1/2726	10.0633	7.71333	5.44	1.33667	6.38333	4.01333	3.58333	2678	8886929	AAF80615.1	143	1.3e-06	F2D10.18 [Arabidopsis thaliana]	--	--	--	--	--	--	--	--	--	--	--	--	--	--	--	--	--	--	--	--	--	--	--	FALSE	-0.71367	1	FALSE	-1.6375	0.19861	DOWN	-2.7688	0.0025449	FALSE	0.31392	1
	2-3k.c24837/1/2733.1	34.62	27.4033	29.3633	5.40667	24.4	17.69	20.0033	1675	8886929	AAF80615.1	208	2.4e-14	F2D10.18 [Arabidopsis thaliana]	--	--	--	--	--	--	--	--	--	P40619	164	4.3e-10	HMG1/2-like protein OS=Ipomoea nil PE=2 SV=1	--	--	--	--	--	--	--	--	KOG0381	HMG box-containing protein	FALSE	-0.66108	1	FALSE	-0.94283	0.82966	DOWN	-2.5403	0.00091351	FALSE	-0.17563	1
TRAF	1-2k.c25302/1/2174	14.04	7.22333	9.48667	2.82667	4.23	8.21	5.72333	2113	727551602	XP_010448322.1	2421	7.5e-271	PREDICTED: regulatory protein NPR2-like [Camelina sativa]	727514439	XM_010435245.1	1082	0	PREDICTED: Camelina sativa regulatory protein NPR2-like (LOC104717639), transcript variant X1, mRNA	K14508	NPR1	regulatory protein NPR1	http://www.genome.jp/dbget-bin/www_bget?ko:K14508	Q9SZI3	2402	1.7e-269	Regulatory protein NPR2 OS=Arabidopsis thaliana GN=NPR2 PE=3 SV=1	PF00799//PF13606//PF00651//PF00023	Geminivirus Rep catalytic domain//Ankyrin repeat//BTB/POZ domain//Ankyrin repeat	GO:0006260	DNA replication	GO:0005515	protein binding	--	--	--	--	FALSE	-0.65176	1	FALSE	-1.2204	0.47576	DOWN	-2.2493	0.015148	FALSE	-1.1037	0.86416
	2-3k.c10505/1/3222.1	12.38	4.53333	1.96333	1.80333	1.52333	3.25333	8.07333	2788	297822777	XP_002879271.1	2346	4.9e-262	BTB/POZ domain-containing protein [Arabidopsis lyrata subsp. lyrata]>gi|297325110|gb|EFH55530.1| BTB/POZ domain-containing protein [Arabidopsis lyrata subsp. lyrata]	297822776	XM_002879225.1	1229	0	Arabidopsis lyrata subsp. lyrata BTB/POZ domain-containing protein, mRNA	--	--	--	--	Q8LEV3	2316	2.1e-259	BTB/POZ domain-containing protein At2g30600 OS=Arabidopsis thaliana GN=At2g30600/At2g30610 PE=2 SV=1	PF00651	BTB/POZ domain	GO:0007155	cell adhesion	GO:0005515	protein binding	--	--	KOG4276	Predicted hormone receptor interactor	FALSE	2.0941	0.88639	FALSE	-0.5913	0.92877	DOWN	-2.748	0.0055426	FALSE	-0.32784	1
	2-3k.c14168/1/2704	9.95333	5.80333	3.43667	2.95667	3.34	5.04333	7.79	2628	297822777	XP_002879271.1	2360	1.1e-263	BTB/POZ domain-containing protein [Arabidopsis lyrata subsp. lyrata]>gi|297325110|gb|EFH55530.1| BTB/POZ domain-containing protein [Arabidopsis lyrata subsp. lyrata]	62318686	AK220663.1	2180	0	Arabidopsis thaliana mRNA for hypothetical protein, complete cds, clone: RAFL21-73-K07	--	--	--	--	Q8LEV3	2330	4.6e-261	BTB/POZ domain-containing protein At2g30600 OS=Arabidopsis thaliana GN=At2g30600/At2g30610 PE=2 SV=1	PF00651	BTB/POZ domain	GO:0007155	cell adhesion	GO:0005515	protein binding	--	--	KOG4276	Predicted hormone receptor interactor	FALSE	1.2397	1	FALSE	-0.3218	1	FALSE	-1.6889	0.10853	FALSE	0.014673	1
	2-3k.c6326/1/2709	12.33	6.3	0.313333	0	1.58	0.67	1.03667	2699	297822777	XP_002879271.1	2346	4.8e-262	BTB/POZ domain-containing protein [Arabidopsis lyrata subsp. lyrata]>gi|297325110|gb|EFH55530.1| BTB/POZ domain-containing protein [Arabidopsis lyrata subsp. lyrata]	297822776	XM_002879225.1	2177	0	Arabidopsis lyrata subsp. lyrata BTB/POZ domain-containing protein, mRNA	--	--	--	--	Q8LEV3	2316	2e-259	BTB/POZ domain-containing protein At2g30600 OS=Arabidopsis thaliana GN=At2g30600/At2g30610 PE=2 SV=1	PF00651	BTB/POZ domain	GO:0007155	cell adhesion	GO:0005515	protein binding	--	--	KOG4276	Predicted hormone receptor interactor	FALSE	1.6256	1	FALSE	-3.8144	0.082029	DOWN	#NAME?	3.65e-05	FALSE	2.4274	0.81774
	2-3k.c9907/1/2805.1	0.0633333	1.06667	0.676667	1.74667	0	5.48	13.3867	1981	297822777	XP_002879271.1	2346	3.5e-262	BTB/POZ domain-containing protein [Arabidopsis lyrata subsp. lyrata]>gi|297325110|gb|EFH55530.1| BTB/POZ domain-containing protein [Arabidopsis lyrata subsp. lyrata]	62318686	AK220663.1	1654	0	Arabidopsis thaliana mRNA for hypothetical protein, complete cds, clone: RAFL21-73-K07	--	--	--	--	Q8LEV3	2316	1.5e-259	BTB/POZ domain-containing protein At2g30600 OS=Arabidopsis thaliana GN=At2g30600/At2g30610 PE=2 SV=1	PF00651	BTB/POZ domain	GO:0007155	cell adhesion	GO:0005515	protein binding	--	--	--	--	FALSE	4.3004	0.66408	UP	7.8116	0.018087	FALSE	4.8197	0.092147	FALSE	#NAME?	0.96277
	3-6k.c21578/1/3479	6.50333	2.32667	0.696667	0.323333	0.216667	1.26333	1.31	3434	297822777	XP_002879271.1	2355	5.5e-263	BTB/POZ domain-containing protein [Arabidopsis lyrata subsp. lyrata]>gi|297325110|gb|EFH55530.1| BTB/POZ domain-containing protein [Arabidopsis lyrata subsp. lyrata]	334184585	NM_001202713.1	1242	0	Arabidopsis thaliana BTB/POZ domain-containing protein mRNA, complete cds	--	--	--	--	Q8LEV3	2325	2.3e-260	BTB/POZ domain-containing protein At2g30600 OS=Arabidopsis thaliana GN=At2g30600/At2g30610 PE=2 SV=1	PF00651	BTB/POZ domain	GO:0007155	cell adhesion	GO:0005515	protein binding	--	--	KOG4276	Predicted hormone receptor interactor	FALSE	0.92685	1	FALSE	-2.3367	0.08181	DOWN	-4.3215	1.4171e-05	FALSE	-1.6488	1
PLATZ	1-2k.c6073/1/1819	24.89	15.6867	14.6667	14.3	5.60333	10.16	5.43667	1828	727440597	XP_010501743.1	901	1.2e-94	PREDICTED: uncharacterized protein LOC104779044 [Camelina sativa]	332189094	CP002684.1	766	0	Arabidopsis thaliana chromosome 1 sequence	--	--	--	--	--	--	--	--	--	--	--	--	--	--	--	--	--	--	FALSE	-1.4573	1	DOWN	-2.224	0.04703	FALSE	-0.75099	0.71948	FALSE	-1.3477	0.43506
	2-3k.c10987/1/1146	479.307	426.947	417.28	336.593	246.127	217.12	207.713	1135	565495354	XP_006305316.1	1345	2.4e-146	hypothetical protein CARUB_v10009696mg [Capsella rubella]>gi|482574027|gb|EOA38214.1| hypothetical protein CARUB_v10009696mg [Capsella rubella]	145335959	NM_101953.4	794	0	Arabidopsis thaliana PLATZ transcription factor family protein mRNA, complete cds	--	--	--	--	--	--	--	--	--	--	--	--	--	--	--	--	--	--	FALSE	-1.0117	1	FALSE	-1.2066	0.34192	FALSE	-0.43847	0.93597	FALSE	-0.71791	0.60415
	2-3k.c16467/1/1115	24.2933	9.96	13.1267	8.4	4.76	3.06	2.85333	1115	727481437	XP_010416579.1	1260	1.7e-136	PREDICTED: uncharacterized protein LOC104702429 [Camelina sativa]	727481436	XM_010418277.1	600	0	PREDICTED: Camelina sativa uncharacterized LOC104702429 (LOC104702429), mRNA	--	--	--	--	--	--	--	--	--	--	--	--	--	--	--	--	--	--	FALSE	-2.2172	0.88875	DOWN	-3.1421	0.010204	FALSE	-1.4746	0.23643	FALSE	-1.3918	0.71144
	2-3k.c19409/1/1129	113.027	43.7467	53.9367	35.1733	18.78	12.21	10.9533	1138	727481437	XP_010416579.1	1265	4.5e-137	PREDICTED: uncharacterized protein LOC104702429 [Camelina sativa]	30699184	NM_106309.2	635	0	Arabidopsis thaliana PLATZ transcription factor family protein mRNA, complete cds	--	--	--	--	--	--	--	--	--	--	--	--	--	--	--	--	--	--	FALSE	-2.2898	0.29438	DOWN	-3.38	0.00023489	DOWN	-1.6197	0.0305	FALSE	-1.4597	0.34327
	2-3k.c24412/1/869	188.31	135.003	107.18	89.05	41.99	54.31	30.6067	867	727440597	XP_010501743.1	1164	1.8e-125	PREDICTED: uncharacterized protein LOC104779044 [Camelina sativa]	30692741	NM_103004.2	643	0	Arabidopsis thaliana PLATZ transcription factor domain-containing protein mRNA, complete cds	--	--	--	--	--	--	--	--	--	--	--	--	--	--	--	--	--	--	FALSE	-1.828	0.61178	DOWN	-2.644	0.0041845	FALSE	-1.0102	0.32825	FALSE	-1.3044	0.11416
[truncated: 59 more rows]
[truncated: 52 more columns]
